# Supplementary material for: Subcellular Phenotyping: Using Proteomics to Quantitatively Link Subcellular Leaf Protein and Organelle Distribution Analyses of Pisum sativum Cultivars
Source: Front Plant Sci. 2019 May 17;10:638. doi: 10.3389/fpls.2019.00638 (PMC6534152; doi:10.3389/fpls.2019.00638)
Supplement: Table S2 — Avarage abundance values of the confocal microscopy analyses for volumes and areas of the analyzed organelles of Pisum sativum leaf cells for cultivar Protecta and Messire. [file Table_2.xlsx]

## Sheet: Tab. S2
supplemental Table 2. Avarage abundance values and respective standard errors of the confocal microscopy analyses for volumes and areas of the analysed organelles of Pisum sativum leaf cells for cultivar Protecta and Messire. (n=3)
	average					standard error
Volume [µm^3]	Chloroplast	Vacuole	Mitochondria		Volume [µm^3]	Chloroplast	Vacuole	Mitochondria
Protecta	4418.21	12353.3	782.979		Protecta	423.781	841.298	117.94
Messire	6037.28	14585.3	987.211		Messire	137.941	2216.43	170.548
%	Chloroplast	Vacuole	Mitochondria		%	Chloroplast	Vacuole	Mitochondria
Protecta	25.1685	70.3712	4.46027		Protecta	1.4927	1.71615	0.369617
Messire	27.9377	67.4939	4.56835		Messire	2.56779	3.01988	0.937455
	average					standard error
Area [µm^2]	Chloroplast	Vacuole	Mitochondria		Area [µm^2]	Chloroplast	Vacuole	Mitochondria
Protecta	4261.32	3279.43	2258.53		Protecta	169.394	143.287	370.861
Messire	6299.74	3846.07	2458.33		Messire	1391.91	164.627	256.698
%	Chloroplast	Vacuole	Mitochondria		%	Chloroplast	Vacuole	Mitochondria
Protecta	43.4861	33.466	23.0479		Protecta	1.27409	0.81374	2.08503
Messire	49.9815	30.5144	19.5042		Messire	5.05229	2.78339	2.97198
