# Supplementary material for: Subcellular Phenotyping: Using Proteomics to Quantitatively Link Subcellular Leaf Protein and Organelle Distribution Analyses of Pisum sativum Cultivars
Source: Front Plant Sci. 2019 May 17;10:638. doi: 10.3389/fpls.2019.00638 (PMC6534152; doi:10.3389/fpls.2019.00638)
Supplement: Table S3 — Information of selected proteotypic peptides from all identified Pisum sativum leaf proteins and their corresponding peak intensities (LFQs, MaxQuant) in 9 fractions each of the 10 different non-aqueous fractionations (NAF). [file Table_3.xlsx]

## Sheet: TabS3
Supplemental Table S3. Information of selected proteotypic peptides from all identified Pisum sativum leaf proteins and their corresponding peak intensities (MaxQuant) in 9 fractions each of the 10 different non-aqueous fractionations (NAF).
								Fractions of NAF 1									Fractions of NAF 2									Fractions of NAF 3									Fractions of NAF 4									Fractions of NAF 5
Sequence	Protein(group)	Leading razor protein	Unique (Groups)	Unique (Proteins)	PEP	Score	Intensity	Intensity fraction_1	Intensity fraction_2	Intensity fraction_3	Intensity fraction_4	Intensity fraction_5	Intensity fraction_6	Intensity fraction_7	Intensity fraction_8	Intensity fraction_9	Intensity fraction_1	Intensity fraction_2	Intensity fraction_3	Intensity fraction_4	Intensity fraction_5	Intensity fraction_6	Intensity fraction_7	Intensity fraction_8	Intensity fraction_9	Intensity fraction_1	Intensity fraction_2	Intensity fraction_3	Intensity fraction_4	Intensity fraction_5	Intensity fraction_6	Intensity fraction_7	Intensity fraction_8	Intensity fraction_9	Intensity fraction_1	Intensity fraction_2	Intensity fraction_3	Intensity fraction_4	Intensity fraction_5	Intensity fraction_6	Intensity fraction_7	Intensity fraction_8	Intensity fraction_9	Intensity fraction_1	Intensity fraction_2	Intensity fraction_3	Intensity fraction_4	Intensity fraction_5	Intensity fraction_6
AEENQNKYEETTSATNSETEIKDR	18375;frv2_106889;frv2_79480;frv2_32832;frv2_33093	18375	yes	yes	5.8549e-142	217.39	10928000	18518	75020	111380	244650	1408800	32432	33632	0	28165	0	70194	66444	49252	168170	70131	58639	29702	26963	0	105350	148060	22243	39512	0	20699	18709	22668	0	0	85657	130310	0	0	0	0	0	30665	135180	64293	121770	0	73858
TNEVYFFKGDYYAR	113570	113570	yes	yes	7.8266e-12	130.72	669580	0	0	0	0	0	0	0	0	0	0	0	0	0	0	11375	0	0	0	0	0	0	0	0	0	0	0	0	0	0	0	0	0	0	0	0	0	0	0	0	0	0	0
VTVTPGATDDQIMDGVR	113570	113570	yes	yes	0.0042656	70.335	177610	0	0	0	0	0	0	0	0	0	0	0	0	0	0	0	0	0	0	0	0	0	0	0	0	0	0	0	0	0	0	0	0	0	0	0	0	0	0	0	0	0	0
VTVTPGATDDQIMDGVRK	113570	113570	yes	yes	0.026021	65.905	110730	0	0	0	0	0	0	0	0	0	0	0	0	0	0	0	0	0	0	0	0	0	0	0	0	0	0	0	0	0	0	0	0	0	0	0	0	0	0	0	0	0	0
THTDGTGYGSTGYGASGGGIGNTGQEYVR	118587	118587	yes	yes	0.0012022	48.579	194920	0	0	0	0	0	0	0	0	0	0	0	0	0	0	0	0	0	0	0	0	0	0	0	0	0	0	0	0	0	0	0	0	0	0	0	0	0	0	0	0	0	0
GVFNVEDEITSVVAPAILYKALVTDADNLTPK	118933;frv2_69729;frv2_102115;frv2_102117;frv2_71190;frv2_38373	118933	yes	yes	0.0033847	43.835	258420	0	0	0	0	0	0	0	0	0	0	0	0	0	0	0	0	0	0	0	0	0	0	0	0	0	0	0	0	0	0	0	0	0	0	0	0	0	65338	0	0	0	0
ATEEPIVAVETVPEPIVTEPTTITEPEVPEKEEPK	121953;frv2_71408;frv2_31335	121953	yes	yes	0.0021703	46.76	13406000	265060	223690	0	0	0	0	25105	22855	0	0	0	0	0	0	0	0	0	0	0	0	0	0	37045	100680	0	0	0	0	0	0	0	0	0	267810	0	0	246240	243590	158800	160360	107790	0
ATEEPIVAVETVPEPIVTEPTTITEPEVPEKEEPKAEVEK	121953;frv2_71408;frv2_31335	121953	yes	yes	7.0017e-08	65.898	5230800	102430	0	214380	306550	397910	0	0	0	0	0	0	54046	52472	0	0	0	0	0	0	0	0	0	0	0	0	0	0	0	0	0	0	0	0	0	0	0	148450	353620	199060	0	0	0
ELNPSLVISLSTGLSLFLGR	131193	131193	yes	yes	4.6854e-29	148.2	2498500	0	102570	113310	195240	0	27944	11305	0	0	18080	0	0	0	0	0	0	0	0	59640	0	0	0	0	0	0	0	0	0	0	0	0	0	0	0	0	0	0	0	0	0	0	0
LPMFGTTDPAQVVKEVDEVVAAYPEAFVR	132082	132082	yes	yes	0.00049794	61.904	22034000	215870	379650	439190	0	0	0	0	0	0	0	0	0	0	0	0	0	0	0	2338500	490920	286170	0	0	0	0	0	0	392300	0	0	0	0	0	0	0	0	0	305210	0	0	0	0
FFELTPEK	137577	137577	yes	yes	0.0051981	99.442	224460	0	0	0	0	0	0	0	0	0	0	0	0	0	0	0	0	0	0	0	0	0	0	0	0	0	0	0	0	0	0	0	0	0	0	0	0	0	0	0	0	0	0
FFELTPEKNQQLQDLDLFVNSVDLK	137577	137577	yes	yes	3.4503e-59	153.76	7873800	0	0	0	0	0	0	0	0	0	0	0	0	0	0	68828	0	0	0	0	0	103440	0	0	0	0	0	0	0	0	0	0	0	0	0	0	0	0	0	0	0	0	0
NQQLQDLDLFVNSVDLK	137577	137577	yes	yes	1.4552e-129	232.01	2416000	0	0	0	0	0	0	0	0	0	0	0	0	0	176130	0	26288	0	0	0	0	64930	0	0	0	0	0	0	0	0	0	0	0	0	0	0	0	0	0	0	0	81829	0
AKLSSGDVFVIPAGHPVAVK	137582	137582	yes	yes	0.010556	56.039	282660	0	0	0	0	0	0	0	0	0	0	0	0	0	0	0	0	0	0	0	0	0	0	0	0	0	0	0	0	0	0	0	0	0	0	0	0	0	0	0	0	0	0
LSSGDVFVIPAGHPVAVK	137582	137582	yes	yes	4.6078e-08	119.54	3064300	0	0	0	0	0	0	10225	0	0	0	0	0	0	0	21969	0	0	0	0	0	0	0	0	0	0	0	0	0	0	0	0	0	0	0	0	0	0	0	0	0	75823	0
AGSQIFSEGGLDYLGNPSLVHAQSILTVWATQVILMGAVEGYR	169061	169061	yes	yes	0.0022754	29.806	21275000	0	399210	479570	516030	2092200	0	109720	0	0	578790	170720	0	0	0	0	0	0	0	451020	219510	0	0	0	0	0	0	0	1058900	82984	0	0	0	0	0	0	0	24400	240190	0	0	0	0
AAVSHVQQVLR	282925	282925	yes	yes	0.0047485	85.963	99809	0	0	0	0	0	0	5129.9	0	0	0	0	0	0	0	0	0	0	0	0	0	0	0	0	0	0	0	0	0	0	0	0	0	0	0	0	0	0	0	0	0	0	0
ATPAEVLANAFGLR	282925	282925	yes	yes	9.7524e-13	134.61	271340	0	0	0	0	0	0	6399.5	0	0	0	0	0	0	0	0	0	0	0	0	0	0	0	0	0	0	0	0	0	0	0	0	0	107820	0	0	0	0	0	0	0	0	0
MEILPILSDSYTLGFIGAGK	417540;frv2_85350	417540	yes	yes	0.00062388	93.776	1735900	10984	21056	0	53683	84183	0	0	0	10836	0	13765	0	11194	0	0	12990	0	0	0	0	0	0	0	0	0	0	0	0	0	19621	10625	0	0	0	69445	0	0	78899	0	0	0	0
GSYADELVK	461501	461501	yes	yes	0.00074907	125.82	10355000	114200	230280	185530	574940	690930	27916	13062	11227	27917	0	0	0	0	0	0	0	5975	0	439760	131200	81150	28878	27402	22668	25180	28101	13796	236600	101790	111180	44396	44040	0	88562	59883	0	180620	147980	59886	47032	0	36331
ADQLTDDQISEFKEAFSLFDK	535444;frv2_75164;frv2_127997;frv2_52735;frv2_75161	535444	yes	yes	1.7709e-71	178.22	11031000	26788	0	0	0	0	119730	0	0	73562	80777	287210	60201	207430	274050	85013	45350	0	30578	0	0	0	0	0	195860	163500	117820	0	61872	31991	0	133630	0	0	174180	0	35427	0	289170	219920	0	0	129620
ADQLTDDQISEFKEAFSLFDKDGDGCITTK	535444;frv2_75164;frv2_75161	535444	yes	yes	1.1779e-07	77.169	1516600	0	0	0	0	0	0	0	0	0	0	0	0	152430	259730	114810	31945	0	0	0	0	0	0	0	0	287910	103530	0	0	0	0	78550	0	0	169490	0	0	0	0	0	0	0	0
AAELTTLLESR	543866	543866	yes	yes	1.3718e-66	231.07	129640000	415850	670510	650540	2138400	2523100	498240	215110	323560	470320	333840	397480	430710	502330	839090	404060	417890	6202.9	440830	1146900	1110400	1033400	830540	279250	529480	1048000	762110	312050	508510	358190	715860	1268700	2234800	462920	2246900	1964500	795920	687290	1518700	1131000	1736100	1977600	1688900
APGIIER	543866	543866	yes	yes	0.024692	85.265	1608900	0	13737	8959.3	31109	39993	0	0	0	6467.8	5530.5	0	0	0	0	0	0	0	0	12651	27317	0	13388	0	8775.7	12011	14045	0	12959	9695.6	17984	28400	35551	0	0	28827	21614	10674	24592	13608	15172	23319	15370
ATSESETLYCVYVAIGQK	543866	543866	yes	yes	2.8408e-05	102.72	3898700	0	0	0	0	0	0	0	0	0	0	95745	32512	128060	183460	110190	0	0	0	0	135210	146900	40542	0	0	108410	0	0	0	0	0	0	167220	0	252880	168120	0	0	0	0	0	0	0
AVDSLVPIGR	543866	543866	yes	yes	0.00014992	156.83	129930000	303880	636650	545350	1403300	1878900	440500	174210	224490	575560	308660	537640	393540	455130	593090	366180	319620	0	344670	925970	1128600	921440	957250	391810	620970	949500	982990	367860	627110	336180	723170	1553500	2490700	379180	2644800	2480200	940640	554270	1627000	1024500	1436500	2332300	1576300
GIALNLENENVGIVVFGSDTSIK	543866	543866	yes	yes	2.5621e-13	110.57	8180000	70873	0	0	0	0	112340	20446	18880	97240	0	131480	0	75237	0	0	72482	9761.3	0	0	220670	0	0	0	0	194600	0	0	0	0	80658	0	0	0	310150	196640	138870	0	167290	98348	0	0	0
GIALNLENENVGIVVFGSDTSIKEGDLVKR	543866	543866	yes	yes	2.5798e-22	110.89	13255000	0	0	0	0	0	0	0	0	0	215920	638900	184650	470200	134250	403540	593630	0	110260	0	0	0	0	0	0	129400	0	0	0	0	0	0	0	0	0	0	0	0	0	0	0	0	0
ITNFYTNFQVDEIGR	543866	543866	yes	yes	7.0078e-225	281.99	568820000	1642300	1846700	2029000	3580800	5860400	3051100	1010500	1519300	2521000	2086800	3473200	2350700	3547200	3926900	2960300	2793500	30040	2249900	4486900	6587900	3597500	1873800	504370	2299100	5542600	3492000	1265200	2343800	1818000	838330	7180700	7445100	0	11208000	5590100	3822700	2484400	7412400	5569800	7270400	8453200	6546900
ITNFYTNFQVDEIGRVVSVGDGIAR	543866	543866	yes	yes	2.0436e-05	75.773	952700	0	0	0	0	0	0	0	0	0	0	0	0	0	70750	0	176480	0	0	0	0	0	0	0	0	0	0	0	0	0	0	0	0	0	0	0	0	0	0	0	0	0	0
KSVHEPMQTGLK	543866	543866	yes	yes	0.00028511	114.24	2426600	0	0	5058.8	15532	82155	0	0	0	8219.8	15676	11509	17359	15046	34025	19930	8007.8	0	14351	15495	12388	8177.1	0	0	0	11842	8379.9	0	0	19901	0	27060	17970	0	0	54019	0	11330	21990	16374	21296	13967	0
RTGSIVDVPAGK	543866	543866	yes	yes	0.005368	96.23	5573700	15489	25806	20205	68115	158780	29285	16428	11665	21074	22799	36352	0	0	0	21581	0	0	0	80080	83361	34653	22010	22539	25842	0	48299	14738	37296	33643	19910	70743	70713	0	166540	151690	0	35796	111020	0	37959	0	70818
SVHEPMQTGLK	543866	543866	yes	yes	0.00058258	105.4	7516500	20090	34446	30949	47309	151690	0	14110	15438	26687	25621	26226	11130	29694	25950	31693	10133	0	27184	71289	67073	24966	48194	18607	10660	68190	20451	14569	38941	36909	62270	74334	186790	0	247800	163830	70834	19476	87166	60669	70336	122990	72533
TAIAIDTILNQK	543866	543866	yes	yes	2.5811e-144	267.07	249310000	431240	775260	924930	2371700	3852600	1044700	341790	312560	1135200	815180	1063400	1022400	1123500	1481700	987880	798150	16804	813180	2736800	3121100	1866500	1338000	689020	1084000	4659300	1494000	564440	1115900	609330	1010500	2127300	3390900	942940	3754900	4163500	2359100	955260	3135400	2801300	2801700	4101100	2681600
TGSIVDVPAGK	543866	543866	yes	yes	0.00039888	143	6065800	21971	42968	37667	106650	146810	19650	13776	13032	25592	0	0	0	28849	35846	0	0	0	24011	58215	51087	56491	49282	29337	18864	0	0	19870	52309	0	0	69089	129150	53270	196050	101090	76265	37149	70204	0	0	0	0
VVDALGVPIDGR	543866	543866	yes	yes	0.0006406	102.87	175910000	723620	1073600	818520	2842900	2981500	668010	279180	333220	623030	499550	661540	607450	673900	986580	500660	410480	8885.6	274390	1637500	1688000	1022600	1294900	690550	786560	1056900	830110	329600	1051600	584650	1001500	1908000	3904500	611160	3501200	2635400	915150	1047300	2215600	1124400	1295300	2633300	1219700
VVSVGDGIAR	543866	543866	yes	yes	0.00091038	131.09	26779000	0	188070	132430	488500	442820	85432	60169	67899	114510	61549	92377	84368	99832	128990	96742	83834	0	70342	0	177480	148230	187990	70993	72527	173520	156090	0	0	0	188540	249430	518960	49951	689420	473420	0	142040	274420	243520	271720	323350	293130
VYGLNEIQAGELVEFASGVK	543866	543866	yes	yes	4.543e-211	261.94	713490000	2038500	2379300	2975000	6803100	13171000	3619100	384130	292270	4191600	2836900	3473500	2672900	3621600	5565600	2896000	3127300	42300	2563800	6578200	8080300	5630000	569100	127650	849740	7380300	3443800	1066600	3597200	1744400	1735300	7721300	2732500	3835300	11068000	5616800	4784700	3099300	11495000	7084800	9875500	3948900	8570800
LDQPLTSNPNVGGFGQGDAEIVLQDPLR	552817	552817	yes	yes	0.00013335	59.561	8140700	152540	167800	93317	0	0	0	31924	36879	197990	0	0	0	0	0	0	0	0	68949	0	0	0	0	0	0	0	174790	87761	0	60003	0	0	0	0	0	0	0	194450	0	0	128330	0	0
KGFLELGDVNTQLK	625990	625990	yes	yes	9.6353e-29	181.76	23488000	0	0	0	586650	1185500	0	0	61968	0	171890	194580	159150	160050	219490	142230	0	0	0	245170	0	0	0	0	99884	258070	137550	102740	132490	66760	55747	282650	0	0	428920	0	0	0	0	439480	0	0	0
TPLIISGPAEKPSDQYFK	693759	693759	yes	yes	1.9032e-05	104.94	6243200	78704	53768	68593	131780	391930	0	0	0	0	33954	96661	42236	0	0	0	0	0	0	429560	41124	48999	0	0	0	0	0	0	155620	80706	68361	0	0	0	0	0	0	140970	0	0	0	0	84661
SVGTYGDAEVEAIQNLQK	729104	729104	yes	yes	0.046324	50.077	947750	0	0	0	0	0	0	0	0	0	0	0	0	0	0	0	0	0	0	0	0	0	0	0	0	0	0	0	0	0	0	0	0	0	123900	0	0	0	0	0	0	0	0
SNVLDGLK	737595	737595	yes	yes	0.00043467	160.82	56654000	144050	296510	228720	849670	842390	182450	156100	236650	238360	142790	128630	148580	198230	363270	185390	128280	14394	133710	404090	250620	261170	610030	455890	391500	418070	451450	178420	278270	196080	488690	439270	1130000	468830	1292700	807600	444410	215390	350330	282790	443180	728380	426930
SNVLDGLKYAPSHEWVK	737595	737595	yes	yes	0.0035771	70.783	1582700	0	0	0	0	0	34841	0	0	0	0	0	0	0	31865	0	0	0	0	0	0	0	0	0	0	0	0	0	0	0	0	0	0	0	0	0	0	0	0	0	0	187200	0
DSDDLLPSVLDALNEITFHPNFLASR	799369	799369	yes	yes	2.2624e-06	81.144	3149800	20038	39449	46633	88886	181520	0	0	0	0	126510	0	0	0	0	0	0	0	0	393710	0	80679	0	0	0	0	0	0	0	0	0	0	0	0	0	0	0	0	53827	0	0	0	0
LANGIPVNYK	799369	799369	yes	yes	0.080143	51.949	29960	0	0	0	0	0	0	0	0	0	0	0	0	0	0	0	0	0	0	0	0	0	0	0	0	0	0	0	0	0	0	0	0	0	0	0	0	0	0	0	0	0	0
LSVGLGGNSIERPTNTTDQSK	799369	799369	yes	yes	0.014929	52.365	1847900	26072	27149	18859	50801	0	0	0	0	0	47159	0	0	9261.6	0	0	6097.4	0	0	216880	69996	33088	0	0	0	0	0	0	41773	33608	21069	0	0	0	0	0	0	0	53359	0	0	0	0
SAFVGKYADELIK	1168408	1168408	yes	yes	1.2405e-28	189.99	4611500	0	0	0	0	0	0	0	0	0	0	0	0	0	0	0	127020	0	0	0	0	0	0	0	0	0	0	0	0	0	0	0	0	0	0	0	0	0	0	0	0	0	0
ATETFLFTSESVNEGHPDKLCDQISDAVLDACLEQDPESK	1346526	1346526	yes	yes	0.00026104	48.847	1747900	0	0	0	0	0	0	0	0	0	0	0	0	0	0	0	0	0	0	0	0	0	0	0	0	0	0	0	0	0	0	0	0	0	0	0	0	0	0	0	0	0	0
GKSYPTVSPDYQK	1351963;frv2_119108	1351963	yes	yes	0.002567	102.33	1389600	0	0	6614.9	0	22570	0	11379	4504.2	5091.2	7405.4	8967.5	13033	39090	101420	33440	47299	0	62187	0	0	0	0	0	0	8478.5	0	0	0	0	16040	0	0	0	0	0	0	0	0	15694	31860	11828	28695
GVFVFDDEYVSTVAPPK	1703042;frv2_69711	1703042	yes	yes	3.0408e-82	204.52	364510000	152890	113670	109220	307700	942200	450500	224420	294020	395080	1224400	2432600	2262600	4096800	5931700	3739200	2747800	20788	2111500	2261300	3196200	2976200	4262700	2443200	4734700	8368600	4930100	1129900	1682500	1159600	1902900	8388900	13792000	3921500	14577000	8888500	4070100	2704800	8247000	6757800	8619800	11006000	5897400
GVFVFDDEYVSTVAPPKLYK	1703042;frv2_69711	1703042	yes	yes	2.4021e-50	168.08	5882600	0	0	0	0	0	0	0	0	0	56014	32871	100370	193400	363520	75500	467790	0	91707	0	0	0	0	0	0	0	0	0	0	0	0	0	0	0	0	0	0	0	0	0	0	0	0
GVFTYENDTTSTVPPAK	1703043;frv2_42493	1703043	yes	yes	1.7544e-10	122.16	7740100	0	0	0	0	0	0	0	0	0	31590	52182	61465	120290	237090	108150	80980	3714.8	80906	0	0	0	56411	35069	59543	72485	65447	15344	0	31869	161640	170760	494680	211900	571150	378310	142110	92197	208010	150630	218740	408290	201780
GVFTYENDTTSTVPPAKLFK	1703043;frv2_42493	1703043	yes	yes	0.05186	44.391	301540	0	0	0	0	0	0	0	0	0	0	0	0	0	0	0	0	0	0	0	0	0	0	0	0	0	0	0	0	0	0	0	0	0	0	0	0	0	0	0	0	0	0
TNNKEAFNISDLSSALNEEDRADLVNALK	1778378;frv2_50256;frv2_82730	1778378	yes	yes	1.2958e-27	119.25	8945100	0	0	64292	0	0	0	0	0	0	0	0	296270	0	999150	0	0	0	157990	0	0	0	0	0	0	0	0	0	0	0	0	0	0	0	0	0	0	0	0	0	0	0	0
MLVYQDLLTGDELLSDSYPYK	2507443;frv2_88077	2507443	yes	yes	1.628e-125	215.88	249180000	655050	516450	317940	999950	1974200	1639500	98622	177540	2334200	252750	404640	319520	392880	407670	406530	300010	0	615740	2814800	4557400	2959700	512960	103280	632710	827800	2685000	316740	1582000	549680	926090	2496700	2187600	2307100	5695600	2218800	2777600	955480	3053100	962210	915450	3642400	1367600
MLVYQDLLTGDELLSDSYPYKEIENGMLWEVEGK	2507443;frv2_88077	2507443	yes	yes	1.5054e-42	112.9	101470000	138360	255350	188850	1192200	5139900	43380	0	0	0	1148100	3184200	22426	508540	84918	84453	887410	0	255690	2053700	0	1021400	0	0	0	819410	0	0	284220	0	220090	468740	0	0	1038600	0	0	0	1500600	389300	0	0	0
EGNAIIR	3893097	3893097	yes	yes	0.0023359	110.63	10004000	187030	0	0	0	0	0	0	0	108520	0	189050	0	90875	139080	82938	0	0	114080	0	0	0	0	0	0	0	0	0	0	0	0	0	0	0	0	170780	0	565860	0	228770	0	0	150690
EIKFEFPAMDTL	3893097	3893097	yes	yes	0	317.44	9737300000	102430000	128340000	114670000	233110000	303840000	22504000	6202900	8310300	31363000	105800000	60344000	36640000	31577000	29908000	24680000	21492000	203990	23251000	326980000	77830000	53699000	8188900	2290300	10664000	37709000	14529000	8995000	93960000	54551000	22283000	33237000	26153000	9869400	41138000	27049000	31105000	122640000	118620000	71692000	46228000	19901000	36433000
FEFPAMDTL	3893097	3893097	yes	yes	4.5123e-24	199.29	421730000	5628200	7758100	3707300	11397000	7664600	1124200	182450	316030	2118200	1978100	854160	591460	408060	344180	349630	286510	4557.2	349750	14426000	5175800	3185700	827740	315640	422290	1060300	872300	273050	7582300	3598400	3394600	1146500	2464500	354820	3562200	2654800	1679600	7161400	5120600	2445200	1533600	2988400	1133100
VALEACVQAR	3893097	3893097	yes	yes	3.7468e-06	166.66	22421000	16297	0	0	0	55305	22410	35722	20645	57470	402910	218450	252520	389840	340730	525510	178890	20084	66948	216630	221970	224490	381730	63766	65551	176070	185850	73229	281520	17281	440420	98531	561550	137360	497920	165160	142860	20589	0	46073	48305	54167	0
WSPELAAACEVWK	3893097	3893097	yes	yes	1.1902e-21	177.36	132100000	0	0	0	0	0	255980	0	0	625300	941620	0	997950	4302100	2489600	3842400	1257300	21866	534200	5405800	4698100	5088400	1168200	204890	794840	3291100	1646300	299410	3779400	0	826110	0	3618000	1681100	3666500	1177500	2485100	0	0	0	0	0	0
LIGSVDVEESVK	3913218	3913218	yes	yes	0.023774	63.073	9280500	0	0	0	0	0	538980	0	0	0	0	0	0	0	0	19501	14310	0	0	0	0	0	97484	0	0	0	0	0	0	0	75665	124650	0	0	164470	146650	63074	0	131690	0	0	0	0
SPFVQIPLGVTEDR	3913218	3913218	yes	yes	0.046414	54.859	926490	0	0	0	0	0	0	0	0	0	0	0	0	0	0	0	0	0	0	0	0	0	0	0	0	0	0	0	0	0	38251	0	0	0	0	0	0	0	0	0	0	0	0
AATGVLAEIIDGDVYK	3913711;frv2_47989;frv2_81966	3913711	yes	yes	4.2032e-134	244.57	468680000	930440	1969700	1054200	2967600	3928900	3647900	527880	1200800	4232700	281710	478790	555830	829680	1328900	849440	816840	0	1397600	2036000	3601300	3953800	4749900	1940900	5813600	6343200	9321000	5506400	1221800	598190	901580	4313000	7143300	7008700	8291600	4782100	5114800	1049000	0	1875900	4543500	3547900	3714200
AATGVLAEIIDGDVYKYYADGEWK	3913711;frv2_47989;frv2_81966	3913711	yes	yes	6.5037e-142	215.62	23406000	49395	45593	112370	298180	967500	106360	0	0	79709	162420	239410	44779	181770	176510	69220	327810	0	278940	130070	0	182120	0	0	48502	519650	63742	89816	0	0	31458	152800	0	0	232380	110060	59149	0	286900	130750	72828	0	0
AATGVLAEIIDGDVYKYYADGEWKK	3913711;frv2_47989;frv2_81966	3913711	yes	yes	9.6107e-72	161.31	203120000	220460	318980	662390	1414100	9483900	624470	12354	0	399370	1294400	2653800	1550900	3112800	5246400	2241500	3014200	28021	3186500	887640	108500	696000	0	0	92656	2828700	212840	322730	121950	70641	194750	1192300	0	0	1051000	269780	357500	102720	1551000	2121800	1509500	0	711510
NLVLYFHDILYNGK	4585273	4585273	yes	yes	2.9117e-17	162.94	5641100	0	0	0	0	0	0	0	0	0	0	157830	144140	213460	140910	199270	316670	10264	147270	0	90523	129080	0	0	0	45460	0	0	76874	0	0	579370	0	0	254360	0	0	0	0	0	0	0	0
ALSSTAATTSSKLKLSNPPSLSHTFTASASASVSNSTSFR	6015084	6015084	yes	yes	0.051024	23.588	1866800	0	0	0	0	0	0	0	0	0	0	0	0	0	0	0	0	0	95596	0	0	0	0	0	0	0	0	0	0	0	0	0	0	0	0	0	0	0	0	240240	78804	0	0
ITEISGVVVSFDPKPIPGDWNGAGAHANFSTK	6016132	6016132	yes	yes	5.7038e-35	118.15	25066000	0	0	0	0	717100	350090	0	0	0	0	296930	135990	200940	1152000	321090	351810	0	226060	0	482840	289560	0	0	0	1266100	395290	0	0	0	180100	553900	0	0	1256900	1043000	540290	0	0	0	0	0	0
WNYDGSSTDQAPGKDSEVILYPQAIFK	6016132	6016132	yes	yes	5.554e-08	84.602	13718000	0	0	0	0	473290	123290	0	0	140770	67798	174730	48121	67099	0	0	0	0	0	271640	387550	212010	0	0	0	0	243290	0	0	0	0	0	0	0	0	0	0	0	0	0	0	195830	0
SVVDEVGSSFETIEK	8489806	8489806	yes	yes	0.010822	67.019	24364000	770210	0	0	0	1941300	187830	51675	24592	121940	0	681860	0	0	0	188950	0	0	0	0	0	0	0	0	0	169250	0	0	624750	0	28028	0	0	0	250350	75752	146170	0	0	0	0	0	135150
WFNVPGFNIVHAINAWDEEDGK	22335707	22335707	yes	yes	0.029457	41.31	1783500	50596	0	0	153190	258380	0	0	0	0	32682	0	0	0	0	0	0	0	0	297540	0	0	0	0	0	0	0	0	69102	0	0	0	0	0	0	0	0	0	0	0	0	0	0
YKTENEAGYPLFPNVFSGFNSLIASAAR	22335707	22335707	yes	yes	3.7784e-28	119.29	9809300	139850	137350	146200	389280	865080	0	0	0	0	0	0	0	0	0	0	0	0	0	631220	0	0	0	0	0	0	0	0	177700	0	0	0	0	0	0	0	0	0	0	0	0	0	0
GAIIGDTIVYGTEVPIK	27446517	27446517	yes	yes	5.1864e-97	220.59	55701000	638510	631780	498970	1088900	0	104980	47853	48677	0	607250	300170	175270	152410	250170	101010	89576	0	43493	2397600	604700	326420	171950	91879	84975	193540	66081	0	658750	333970	107630	161760	299230	0	257430	147720	103360	889620	545940	314620	205950	213550	132820
AEEGQVIGVHTVDAWK	27466894;frv2_46495;frv2_75210	27466894	yes	yes	3.4067e-09	128.1	8215900	0	0	0	0	0	49577	0	0	61500	0	0	0	0	0	0	0	0	0	0	149010	225320	0	0	0	0	150430	62152	51589	40673	0	0	183550	0	0	277970	0	67820	121200	0	95812	228620	0
AEEGQVIGVHTVDAWKEQLEK	27466894;frv2_46495;frv2_75210	27466894	yes	yes	2.4368e-32	147.49	112210000	329890	276080	385400	560940	2034600	595780	176990	149190	444920	278670	770450	541090	706520	0	704540	601800	0	827950	1275300	1010900	1267100	226680	38127	534030	1423800	887930	428630	484750	262780	140130	1646700	964250	513390	1784100	1201800	752780	583860	1876400	1305000	1241600	642510	1610800
VLAGKLSTELGIK	34452233;frv2_74669;frv2_33536	34452233	yes	yes	0.011535	86.944	194780	0	0	0	0	0	0	0	0	0	0	0	0	0	0	0	0	0	0	0	0	0	0	0	0	0	0	0	0	0	0	0	0	0	0	0	0	0	0	0	0	0	0
ASLPKPTPLLKDELDIVIPTIR	34582497;frv2_107216	34582497	yes	yes	1.9058e-15	118.84	0	0	0	0	0	0	0	0	0	0	0	0	0	0	0	0	0	0	0	0	0	0	0	0	0	0	0	0	0	0	0	0	0	0	0	0	0	0	0	0	0	0	0
ATTTVRPPPLTSTSEPPPLFDGTTR	37051105;frv2_80219	37051105	yes	yes	4.5733e-09	96.128	135700000	333450	474040	472220	1353100	2513700	759150	287340	470860	793170	608020	625800	830060	884610	1896000	874710	1196100	6681.8	772710	447880	1919800	1968300	1554000	587860	1264900	778170	499520	1295100	721490	339910	915910	2482100	3040900	476200	3129000	2890200	1180600	0	797570	286920	0	391160	1137500
AVTFYNLK	38232568;frv2_45967	38232568	yes	yes	0.028273	124.98	5091700	0	0	0	0	0	0	23182	33836	27896	0	0	31706	36436	95758	21863	29706	0	0	0	73002	76333	67368	36442	79970	81434	61965	45740	0	17039	40549	91919	130740	0	134800	115460	0	0	93606	54523	99464	0	0
AVLNPMAAMFGGIVGQEVVK	49175783	49175783	yes	yes	2.8776e-13	124.94	1602600	0	0	139310	0	0	0	8495.2	0	0	0	0	0	0	0	0	0	0	0	0	0	0	0	0	0	0	79483	0	0	0	0	0	113870	145380	0	0	0	0	0	0	322900	90094	0
EALTNPGEFLLSDFSK	49175783	49175783	yes	yes	1.5608e-24	159.04	3354900	0	0	0	0	0	0	0	0	0	0	0	61513	0	0	0	0	0	58142	0	0	0	0	0	0	0	0	0	130370	0	0	157890	87971	0	239050	0	0	0	0	191580	0	0	103060
FISEIGRFPVAGSEDDAQK	49175783	49175783	yes	yes	3.7709e-05	96.208	10467000	0	56037	0	0	146810	0	0	0	0	47094	117370	0	17372	0	12903	0	0	0	0	254580	0	0	0	0	66215	0	0	0	41912	31664	0	0	0	246930	0	34523	0	394620	210710	0	0	0
FISIANSINENSGDGRLEDVNPK	49175783	49175783	yes	yes	4.4146e-05	81.878	17015000	92869	97169	94736	0	0	97948	0	20992	80996	0	186050	104970	129960	0	0	0	0	0	0	276060	0	72881	0	0	178920	126520	0	0	73143	0	317120	0	0	410170	0	124690	167730	0	466860	476110	0	0
LLQQFAFGAR	49175783	49175783	yes	yes	0.00068008	125.71	5128800	0	0	0	0	531720	0	0	0	0	0	95621	85829	0	0	0	80955	0	0	0	366400	0	0	0	0	0	0	0	0	0	0	0	0	0	0	0	0	0	0	0	0	0	177700
VLNFKPLR	49175783	49175783	yes	yes	0.01621	104.21	757260	0	0	0	0	0	0	0	0	0	0	0	0	0	0	0	0	0	0	0	0	0	8923	0	0	26934	0	0	0	0	33923	37531	33976	0	0	46677	39946	0	0	0	0	0	0
MEFDTIPQEAMWQMNLR	62901479;frv2_102835	62901479	yes	yes	0.0043816	99.392	6942100	0	0	0	0	0	0	0	0	73766	0	0	0	0	0	0	0	0	0	0	151520	133510	0	24567	166570	261100	282090	164340	0	0	0	0	176740	0	252550	0	85088	0	89969	0	0	0	0
GQDAGGVLDAIGETIAEIAHTTK	75102461	75102461	yes	yes	0.028015	40.137	118550	0	0	0	0	0	0	0	0	0	0	0	0	0	0	0	0	0	0	0	0	0	0	0	0	0	0	0	0	0	0	0	0	0	0	0	0	0	0	0	0	0	0
GSDILGAVTETVSDIGSSMIKPIDNANTK	75102461	75102461	yes	yes	0.00059617	54.261	233130	0	0	0	0	0	0	0	0	0	0	0	0	0	0	0	27868	0	0	0	0	0	0	0	0	0	0	0	0	0	0	0	0	0	0	0	0	0	0	0	0	0	0
LNYEAYTYPR	75107084	75107084	yes	yes	3.8861e-12	183.99	14515000	235960	0	0	0	0	0	0	0	0	359020	0	0	0	0	0	0	0	0	0	0	0	0	0	0	0	0	0	578610	298000	0	0	0	0	0	0	0	824830	556210	0	0	0	0
AFFDQLVLLDSSYPGGLVAYINNAK	75110834	75110834	yes	yes	0.02002	44.183	977940	0	0	0	0	0	0	0	0	0	0	0	0	0	0	0	0	0	0	0	0	0	0	0	0	0	0	0	0	0	0	0	0	0	0	0	0	0	89968	0	0	0	0
AGNNPFDGFTPSVPTGETLK	75110834	75110834	yes	yes	1.9021e-19	131.9	16963000	0	0	0	102580	0	88896	35057	67025	135580	0	0	68425	0	0	0	0	0	0	0	179060	0	105410	42661	102860	0	189510	82951	0	0	0	220010	252790	0	328620	306500	197310	0	259830	0	0	323200	217800
GNPYHSATSGEMAIYR	75110834	75110834	yes	yes	0.0027266	74.966	1179200	0	0	0	0	0	8078.4	5748.7	0	0	0	0	0	0	0	0	0	0	11147	0	17477	9986.7	0	0	0	26294	22046	0	0	0	0	0	29666	0	50490	28145	19890	0	27286	19930	0	28795	0
MLLDNGQDHLFR	75110834	75110834	yes	yes	0.031501	60.161	613020	0	0	0	0	0	0	0	0	24953	0	0	0	0	0	0	0	0	0	0	0	18404	0	0	0	40501	0	0	0	0	0	0	0	0	0	0	0	0	0	0	0	0	0
VGFTVMETWFAYAPVK	75110834	75110834	yes	yes	0.00059938	89.506	1537000	0	0	0	0	0	0	0	0	0	0	0	0	34283	0	14327	20068	0	31095	0	0	0	0	0	0	0	0	0	0	0	0	0	0	0	0	0	0	0	107340	49620	0	0	0
DAFGVWEIFLPNNADGSPPIPHGSR	75221107	75221107	yes	yes	1.9547e-07	86.439	12412000	98120	103740	110230	288080	658420	77273	0	0	60482	205760	171780	83939	70635	119310	77035	0	0	0	774000	246690	0	0	0	0	0	0	0	182370	49717	0	0	0	0	0	0	30585	110950	0	0	0	0	0
IVLDSDDTLFGGFNR	75221107	75221107	yes	yes	1.5558e-30	185.27	10231000	105410	105610	152190	176840	359600	0	10090	0	0	135030	150290	0	88757	101040	0	34441	0	0	521030	186480	0	0	0	24797	0	83318	0	163490	62829	0	0	0	0	0	0	0	186840	0	0	0	0	0
LNHTAEYFTSEGWYDDRPR	75221107	75221107	yes	yes	0.00232	70.334	4926900	56503	0	42595	0	148900	0	0	0	0	65144	60400	24415	40349	144260	0	24407	0	31097	433650	128160	97241	0	0	0	61772	0	0	76345	0	0	0	0	0	63079	0	0	75566	80726	47121	85461	46429	0
SAALVGDFNNWNPNADVMTK	75221107	75221107	yes	yes	1.3714e-27	140.47	12023000	166020	0	144090	226080	350700	73372	45955	57887	104450	253270	142040	104050	92092	99048	61390	59686	0	55632	825920	215230	121680	57276	0	0	0	80954	0	0	135570	0	0	123440	0	0	0	0	0	0	146880	0	0	0
LDVLSNEVFVK	75303233	75303233	yes	yes	0.0051764	84.507	1521900	0	0	0	0	0	0	0	0	0	0	0	0	0	0	0	30264	0	29427	0	0	0	0	0	0	100010	0	0	0	0	0	0	0	0	0	0	0	0	0	0	0	0	0
TLLYGGIFLYPGDKK	75303233	75303233	yes	yes	0.0084855	69.03	4846300	0	0	0	0	0	0	0	37902	0	0	0	0	0	189360	136860	0	26540	118070	0	287920	0	0	0	0	0	0	0	0	0	0	0	0	0	0	0	0	0	0	0	271320	200480	0
AMGIMNSFINDIFEKLASEASR	122045024	122045024	yes	yes	4.8042e-05	84.208	3556900	51256	0	0	0	0	0	0	0	0	0	0	40145	22770	14415	13621	0	0	0	0	0	0	0	0	0	0	0	0	0	0	0	28205	0	0	41073	0	0	0	106110	0	0	0	0
SLLSDLINLDLSGTTEK	227478241	227478241	yes	yes	0	300.18	400800000	1104000	1821000	2153100	4644000	9534300	0	161480	67406	1769100	1657900	2380500	5001.4	4294500	0	608780	3792400	0	1911400	4013400	4744000	6431800	0	281780	0	6580000	2717000	4778500	2006800	543510	2508600	4386600	2300400	3782000	10600000	9553300	3373500	212780	5387900	1634400	996920	0	1070700
EIAEAYLGSALDDVVTVPAYFNDSQRQATKDAGVIAGLNVMR	257307195	257307195	yes	yes	0.042133	22.585	1273800	0	0	0	0	0	0	0	0	0	0	0	0	0	0	0	0	0	0	0	0	0	0	0	0	0	0	0	0	0	0	0	0	0	0	0	0	0	0	0	0	0	0
ETFYSSEPVIGYTDYPFLE	257632899	257632899	yes	yes	5.1731e-13	126.63	27902000	40454	62323	0	108940	168640	121990	36898	55086	94996	158850	291930	0	346890	587560	322990	315080	0	393690	186590	0	0	0	0	195660	366930	303000	0	0	0	0	422100	678580	0	774390	665210	0	249800	732340	430010	503770	439010	429360
GATTTDSVPLLTPYNMGK	257632899	257632899	yes	yes	8.9655e-05	97.214	5704400	0	0	0	0	0	0	0	0	0	0	138390	163840	115500	206170	73077	52640	0	56234	171610	0	0	66287	28325	0	0	0	0	0	68460	198820	168380	409140	0	224910	126500	92112	0	0	0	0	0	0
IIDTFDPVETPHSLEPMR	257632899	257632899	yes	yes	3.2155e-171	254.71	48602000	38456	22517	41103	103470	451660	282800	61857	66221	177970	28988	31003	141900	176980	294600	176690	175610	0	292170	0	312920	279870	131530	111290	198120	153110	124510	151270	116140	61692	157680	730460	861440	0	1661200	1204600	562690	0	586990	491090	1661500	2237100	547290
IIDTFDPVETPHSLEPMRK	257632899	257632899	yes	yes	1.0919e-06	109.79	45777000	0	0	30553	0	89799	117970	43822	10467	94970	69829	398530	431840	614440	1200200	498350	652780	0	703790	0	206060	222350	0	21558	169030	160590	271260	135750	159400	117120	0	783100	759570	0	1357300	897860	606180	356670	1306600	959250	1105200	280760	1082600
GATTTDPIPLLTPYNMGK	257632905;frv2_49036	257632905	yes	yes	2.5311e-11	126.63	5600900	0	0	0	0	0	0	0	0	0	107190	121380	0	88672	119230	62323	78252	0	0	0	0	0	59607	0	0	0	0	0	106280	0	150120	264780	418470	0	0	0	0	0	0	142290	0	186970	0
GAPIANAIPLITPYK	257632919;frv2_49034	257632919	yes	yes	0.00035493	101.2	2800000	28141	48615	50912	117470	0	0	0	0	0	66098	58374	34235	29066	39998	20872	14166	0	0	326690	69352	0	0	0	0	0	0	0	119530	0	63328	0	0	0	0	0	0	75480	0	0	0	0	0
ATAPTPREEFVYMAK	257664820;frv2_85128;frv2_43449;frv2_33475	257664820	yes	yes	0.00034152	110.55	1267800	0	0	0	0	0	0	0	0	0	0	0	0	0	0	0	102300	0	0	0	0	0	0	0	0	0	0	0	0	0	0	0	0	0	0	0	0	0	0	0	0	0	0
AGLAPEGSQFDAGKFDAR	257721498;frv2_113083	257721498	yes	yes	0.00014127	109.1	7110000	0	63223	0	0	287690	47886	31248	0	73483	0	53047	71287	96504	119480	48043	58675	0	78157	0	0	0	39558	0	64562	0	125480	76836	0	0	90494	161490	0	0	0	0	79688	0	187810	121660	195220	0	183290
TITPPPSDTEVSVLENK	295136979;frv2_80230;frv2_49839	295136979	yes	yes	4.5426e-16	130.47	50175000	698460	1187300	782160	2051100	2370400	89192	32835	32629	103980	556100	517530	0	0	243870	75580	51951	0	39630	1879800	37865	204020	47203	20161	22213	70700	0	30690	76224	555190	48656	88509	111100	0	0	97940	62766	77174	523180	211150	81027	0	93729
TITPPPSDTEVSVLENKNLGR	295136979;frv2_80230;frv2_49839	295136979	yes	yes	0.063269	54.668	530000	0	0	0	0	0	0	0	0	0	42167	0	21787	27424	41243	0	13021	0	0	0	0	0	0	0	0	0	0	0	0	0	0	0	0	0	0	0	0	0	0	0	0	0	0
DRWLTMALMGGFAR	295136980	295136980	yes	yes	0.00069253	94.402	1193900	0	34045	49516	67866	0	0	0	0	0	44088	0	0	0	0	0	0	0	0	98441	0	0	0	0	0	0	0	0	0	0	0	0	0	0	0	0	0	0	0	0	0	0	0
ETIEANLSLR	295136980	295136980	yes	yes	0.0089802	82.494	2057400	51498	144050	0	221040	0	0	0	0	0	0	0	0	0	0	0	0	0	0	292630	0	0	0	0	0	0	0	0	0	35049	0	0	0	0	0	0	0	0	0	0	0	0	0
ETIEANLSLRR	295136980	295136980	yes	yes	0.037321	79.23	6784800	57872	73438	68435	148790	289720	0	9916.8	7639.9	0	73832	31876	29591	13734	0	0	13251	0	9807.1	423170	0	0	0	0	10239	0	14936	0	84252	53704	46630	26020	0	0	0	0	13065	129500	202090	96799	21887	14818	56055
IGNNEITILVTDAESASDINPQEAQQTLQIAEANLNK	295136980	295136980	yes	yes	9.2518e-38	108.61	171320000	2998900	1364700	974170	1879700	4450800	522990	0	0	49495	1836700	486390	0	347090	173530	0	309820	0	46942	14326000	4966100	2368000	23172	0	71589	733490	316180	165040	3873400	907650	1089600	331740	92958	143280	1071800	482390	55210	359680	0	1663300	620180	0	202260
IGNNEITILVTDAESASDINPQEAQQTLQIAEANLNKAEGK	295136980	295136980	yes	yes	9.6787e-42	107.43	53676000	814110	399830	421280	416170	1705800	0	0	0	53155	607210	629230	55128	156370	102090	0	193150	0	178190	4537600	651120	680130	0	0	0	383330	39782	0	788970	190600	524730	278800	0	0	136110	0	0	153130	1569000	794490	355200	0	85841
IGNNEITILVTDAESASDINPQEAQQTLQIAEANLNKAEGKR	295136980	295136980	yes	yes	4.7218e-32	101.72	47894000	0	249970	379650	467940	3245600	0	0	0	0	1759700	1739000	268380	604700	852760	256780	441430	0	276910	1433300	0	0	0	0	0	220530	0	0	0	51223	0	179560	0	0	0	0	0	0	1100400	1182000	368440	0	208840
IVWDSEVK	295136980	295136980	yes	yes	0.038081	76.478	1949200	0	172570	119620	383740	291380	0	0	0	0	0	0	0	0	0	0	0	0	0	0	0	0	0	0	0	0	0	0	0	0	0	0	0	0	0	0	0	0	0	0	0	0	0
RETIEANLSLRR	295136980	295136980	yes	yes	0.016188	85.924	399190	0	0	0	0	0	0	0	0	0	0	0	0	0	0	0	0	0	0	117860	0	0	0	0	0	0	0	0	0	0	0	0	0	0	0	0	0	0	0	0	0	0	0
TRVEAIVETIK	295136980	295136980	yes	yes	0.0020962	125.03	47241000	434260	516830	386600	1193100	1525100	85537	36694	35061	105500	408320	299530	111820	102000	98119	65438	51562	0	44368	2517900	483070	249230	10980	0	9535.7	0	0	0	926850	403960	60828	0	32365	0	40094	0	0	1019400	676360	286840	105050	189660	123140
TRVEAIVETIKR	295136980	295136980	yes	yes	0.0001096	128.36	35002000	307560	269240	360060	851780	1664000	56630	16326	0	136130	418270	227870	179110	94069	115160	59820	61125	0	46230	1558500	273820	145630	15333	0	24586	57279	44526	23594	940120	213370	388240	147990	69764	0	0	60259	69781	427090	569840	175320	0	98877	0
VEAIVETIK	295136980	295136980	yes	yes	0.01382	70.028	1721100	23797	45852	21797	75093	44519	0	0	7444.4	6357.6	8259.7	8348.5	0	0	0	0	0	0	0	44743	17321	10617	0	0	0	0	0	0	35258	22827	30057	0	0	0	0	0	0	32950	24437	11210	0	0	0
VEAIVETIKR	295136980	295136980	yes	yes	8.315e-06	166.86	11333000	148140	179590	136280	400030	354090	12482	6545.5	11487	20658	61069	25079	18510	21916	24328	11498	15567	0	14745	403940	147160	69616	15247	0	10145	39607	18382	9862.3	199020	125200	124310	25873	0	0	0	0	20302	262010	111100	0	39803	0	0
WLTMALMGGFAR	295136980	295136980	yes	yes	1.0863e-72	231.05	120730000	1201200	2357200	2276200	5412200	6349500	74463	0	0	44959	1155400	631000	175740	119570	108460	177980	92026	5404.8	26267	4762600	763590	474290	0	0	0	0	0	0	1847900	279970	35266	98326	0	0	0	0	0	1102800	1006900	209860	0	0	0
DYIAPNFYEIQDAH	295136983	295136983	yes	yes	0.0053805	74.789	4478100	61249	102290	92352	223180	253240	0	0	0	0	83346	41611	35686	0	0	0	0	0	0	237440	56795	0	0	0	0	0	0	0	99358	66372	0	0	0	0	0	0	0	0	0	0	0	0	0
ILMPESWIGWPLR	295136983	295136983	yes	yes	0.0028769	82.85	4418400	0	0	0	179850	257670	0	0	0	0	30105	0	0	0	0	0	0	0	0	307430	100500	0	0	0	0	0	0	0	121820	34456	0	0	0	0	0	0	0	0	0	0	0	0	0
IPSLFWVWK	295136983	295136983	yes	yes	9.0806e-06	135.71	9308000	106650	187950	185120	442120	0	0	0	0	0	88334	69653	0	17722	43775	13575	13390	4474	0	370280	0	83083	0	0	0	0	0	0	134920	0	0	0	0	0	0	0	0	96784	114960	0	0	0	0
MQGNLSASLVK	295136983	295136983	yes	yes	0.0026224	93.623	1858700	22792	26548	32160	50398	60902	0	0	0	6369.9	0	0	5080	6518.3	0	12468	0	0	0	156660	27660	0	14336	0	0	0	0	0	35050	24721	23226	0	21473	0	0	0	0	43754	0	0	0	0	0
AKQIASAPR	295136986	295136986	yes	yes	0.0063864	112.11	804300	21185	25717	21055	50173	32351	0	0	0	0	0	0	0	0	0	0	0	0	0	14462	0	0	0	0	0	0	0	0	46235	0	0	0	0	0	0	0	0	33063	13041	13174	9821	0	0
VYLWHETTR	295136986	295136986	yes	yes	1.7205e-07	174.02	425460000	3097000	4012100	3571800	9883900	10135000	618100	379750	699750	961690	3690700	1661800	1296800	1298100	2213900	1007300	694760	5127.7	467290	16566000	4215500	1964400	1616800	486490	841970	1358800	797450	140640	8638600	4188600	5019300	2067500	3589000	133840	2702600	1971200	1169500	5753000	4606300	2404300	1709500	1781700	1577000
KEEENPGSVEFQVFNFTNK	295136999	295136999	yes	yes	8.4971e-37	153.83	26268000	399530	549430	383820	649500	627460	138490	14322	0	0	335300	167620	59670	78782	37496	0	0	0	69179	1666300	221260	0	0	0	0	0	51027	65002	270250	181730	39774	60842	0	0	0	72232	0	700070	507610	273400	0	0	0
LLSYLSK	295136999	295136999	yes	yes	0.028692	82.671	3718500	43272	87750	48623	139620	80785	0	0	0	0	57228	0	9912.7	0	0	0	0	0	0	207930	41173	15942	13100	8034.4	0	0	0	0	89760	14486	32734	0	0	0	0	0	0	85534	51327	13280	0	0	0
LTSHFELHPK	295136999	295136999	yes	yes	0.0053393	88.134	1322300	7463.7	8584.9	14120	41800	0	3097.3	0	0	0	34710	8432.5	0	3204.6	0	0	0	0	0	200380	18389	8952.7	0	0	0	0	0	0	49014	14104	11305	0	16454	0	0	0	0	22684	23009	11397	0	0	3346.5
RLTSHFELHPK	295136999	295136999	yes	yes	0.029859	62.166	189280	0	0	4969.4	0	0	0	0	0	0	0	0	0	0	0	0	0	0	0	106040	0	0	0	0	0	0	0	0	0	0	0	0	0	0	0	0	0	0	7741.4	0	0	0	0
DLMIVNMGPQHPSMHGVLR	295137000	295137000	yes	yes	0.0017526	68.413	2254200	29368	0	0	0	0	0	0	0	0	42450	0	0	0	0	0	0	0	0	517930	0	0	0	0	0	0	0	0	84754	0	0	0	0	0	0	0	0	63767	0	0	0	0	0
ELIYDLFEAATGMR	295137000	295137000	yes	yes	1.2631e-47	181.71	3138800	29508	44324	29410	91164	82247	0	0	0	0	33706	23111	0	0	0	0	0	0	0	253790	0	39648	0	0	0	0	0	0	83956	23244	0	0	0	0	0	0	0	0	0	0	0	0	0
TIIQYLPYVTR	295137000	295137000	yes	yes	0.0019754	98.368	6589700	96245	0	69280	263520	0	0	0	0	0	72323	0	28401	21472	0	0	0	0	0	651420	132930	0	0	0	0	0	0	0	130520	69555	38160	0	0	0	0	0	0	130970	185080	0	0	0	0
FDSLEQLDEFSR	295137004	295137004	yes	yes	5.662e-247	301.35	113790000	3236000	4188100	2314600	5283700	3666600	219750	130480	105390	0	51408	0	47917	29877	0	30311	0	0	47986	401400	0	48290	0	0	0	0	0	0	108050	0	57468	0	0	0	0	0	0	2641800	1176500	745540	340820	167960	211660
PNEYFTETR	295137004	295137004	yes	yes	0.013319	80.014	589560	35672	0	0	0	0	0	0	0	0	0	0	0	0	0	0	0	0	0	0	0	0	0	0	0	0	0	0	0	0	0	0	0	0	0	0	0	77240	0	0	0	0	0
QGIPLITGR	295137004	295137004	yes	yes	0.0023855	101.66	50214000	881740	1267800	918450	2008000	1603900	76420	32841	66877	70112	33161	21825	19997	0	0	10300	0	0	9114.1	118040	0	0	0	0	0	0	0	0	47386	0	16497	0	0	0	0	0	0	1146900	637850	245090	136600	94614	71679
QGIPLITGRFDSLEQLDEFSR	295137004	295137004	yes	yes	0.00028014	78.401	68187000	1060600	901060	2022100	2377800	7266800	84007	43739	0	60182	132280	112410	148940	99264	66696	60373	80509	0	28931	0	0	0	0	0	0	0	0	0	0	0	0	0	0	0	0	0	0	876520	1115800	696280	329990	0	132000
SFADIITSIR	295137004	295137004	yes	yes	1.9667e-11	177.57	33633000	684190	850310	715630	1056700	1297400	57243	12863	23835	0	0	0	0	0	0	0	0	0	0	150450	0	0	0	0	0	0	0	0	42003	0	0	0	0	0	0	0	0	981240	581150	145810	0	0	0
TIDRTYPIFTVR	295137005	295137005	yes	yes	4.1912e-05	153.49	28708000	280120	372190	937380	841960	2290300	70888	74346	63050	115460	0	0	0	0	0	0	67270	0	0	0	0	124280	106610	41568	77888	0	0	45366	0	0	0	0	0	0	0	0	0	520700	500040	0	162620	0	161770
TYPIFTVR	295137005	295137005	yes	yes	0.037199	102.77	74429000	1081000	1513800	1555800	3361500	3757300	70558	28371	41699	126430	40398	29996	34006	12528	48463	14753	0	0	0	241390	0	0	0	0	0	0	0	0	111760	0	33959	0	0	0	0	0	0	1360300	1193000	301040	99768	80131	144840
EAIQEQMELF	295137014	295137014	yes	yes	0.0008727	141.88	6747800	88415	234380	142660	509930	416750	0	12912	0	35761	81703	30304	18111	0	15042	0	0	0	14566	307610	81995	0	0	0	0	0	0	0	102260	73508	87613	0	0	0	0	0	0	93468	0	36609	0	0	0
EGTVGIALNLESK	295137014	295137014	yes	yes	4.4006e-65	180.3	76824000	1081200	960440	716910	1396800	1601200	199190	73774	105080	196980	724240	340150	147260	161600	232990	302790	139210	6316.5	104760	4428300	1069600	608250	144080	48466	111050	259670	132510	151580	831300	646420	381240	269850	187940	0	571980	276980	160160	3638500	1228900	449680	235690	373740	277580
FNEIISSTK	295137014	295137014	yes	yes	9.3226e-08	166.69	100880000	836650	1547100	1076600	2737500	5163300	155510	93066	174340	306870	1098100	499370	372030	357450	467580	255680	156590	0	100020	3683800	731760	530460	0	151230	0	275250	208680	95613	1544400	1072800	861740	270660	474020	0	545330	331200	261420	1439700	887910	476490	318450	267650	203500
GEISTSESR	295137014	295137014	yes	yes	0.0013941	109.29	1788900	11325	0	29112	133480	198070	0	0	0	0	7209.4	7637.9	0	0	0	0	0	0	0	15518	18863	10856	0	0	0	0	0	0	64262	6190.4	0	0	0	0	0	0	9237.9	30172	35989	6523.9	0	0	0
IYGLDDVMAGELVEFK	295137014	295137014	yes	yes	8.488e-208	249.36	1414700000	14197000	17171000	12867000	23973000	32847000	3539000	328130	499250	4647900	13320000	8519300	3039200	2966000	2443000	2301300	1474900	15319	1509800	57569000	20081000	10598000	472810	160590	991790	4225600	1274300	1070200	19823000	8541800	3796600	4107100	1562500	894760	5105400	1333700	2639900	18944000	18170000	8259500	5029100	1116500	3124700
IYGLDDVMAGELVEFKEGTVGIALNLESK	295137014	295137014	yes	yes	2.9424e-98	172.3	21944000	29398	127920	510900	765250	2073600	159750	8929.1	0	0	1366600	1009400	26874	0	0	15181	32887	8573.4	0	242470	0	0	0	0	0	0	0	0	0	0	0	0	0	0	0	0	0	0	0	0	0	0	0
QSQSAPLTVEEQIITIYTGTNSYLDSVEIAQVR	295137014	295137014	yes	yes	8.9852e-46	124.82	457540000	3153200	4961300	5945800	940760	17987000	1688700	75822	0	22432	661070	8572700	338390	1922000	400650	14625	1490800	14565	580660	30009000	9152400	6287400	640920	0	117270	1495000	288700	467970	7869500	592500	190990	844350	154510	0	2041700	1851000	464190	162310	8908900	2233100	383200	47345	79609
QSQSAPLTVEEQIITIYTGTNSYLDSVEIAQVRK	295137014	295137014	yes	yes	8.9034e-54	126.04	67032000	120290	462280	1062500	1208700	4262700	0	0	0	0	3707900	2594700	714030	1110000	1712900	497280	610700	0	48328	1064900	0	77911	0	0	0	132110	0	0	0	0	0	84335	0	0	0	0	0	0	587270	724240	163470	0	102000
TFTGEAEAILK	295137014	295137014	yes	yes	1.1526e-41	213.35	78477000	858980	1545500	1046200	3048500	2780700	198820	103380	135500	256530	568480	339380	285860	278680	336660	171450	96397	7430.7	138190	2266000	714770	417840	188280	114710	203390	290490	251580	142280	1126400	767650	559100	254700	0	0	0	0	0	2165500	0	442850	178100	0	210240
TFTGEAEAILKEAIQEQMELF	295137014	295137014	yes	yes	0.023554	60.938	1067300	0	0	21217	0	73113	17970	0	0	0	57102	142110	0	14261	0	0	31371	0	0	0	0	0	0	0	0	0	0	0	0	0	0	0	0	0	0	0	0	0	0	0	0	0	0
VVNALAKPIDGR	295137014	295137014	yes	yes	1.7468e-05	150.09	392060000	3948200	4763200	3685500	8983900	11078000	627690	221910	490520	963690	3358300	1833300	1284000	778890	973690	683950	373370	3760.8	327360	17628000	4267800	2605500	1073300	158430	441920	1234800	557590	261120	7071900	3582600	3872200	1221700	1916700	115470	1977600	1432100	823370	7727200	5414300	2183600	998090	1080900	814500
VVNALAKPIDGRGEISTSESR	295137014	295137014	yes	yes	2.8399e-30	139.78	210080000	1576300	1665100	3183200	3297400	10659000	125840	324720	125210	112510	6632600	4395300	2652000	1786800	3234900	1455300	1103200	0	653380	3341300	194380	305970	80436	33777	192130	494430	39071	71141	692780	987670	923210	525860	70974	0	265770	156840	131410	2871000	2305300	2779400	896580	23490	878930
AINQVQQSVLQQALQGALGTLNSCLNNELHLR	295137015	295137015	yes	yes	2.9483e-111	171.36	10150000	0	59247	0	0	189360	0	0	0	0	537200	109100	0	0	0	0	15447	0	0	307880	0	146760	0	0	0	0	0	0	548380	0	0	0	0	0	0	0	0	0	0	0	0	0	0
EKLNLINSIYTSLEQFENDK	295137015	295137015	yes	yes	4.9432e-83	201.9	17687000	237080	182430	147090	369680	1432100	40436	0	0	33349	348150	319820	65823	25978	32321	44836	0	0	0	749390	121830	0	0	0	0	0	0	0	283090	82525	0	0	0	0	0	0	0	167010	306140	144130	0	0	0
EKLNLINSIYTSLEQFENDKNK	295137015	295137015	yes	yes	2.0465e-11	112.82	18539000	147800	434100	270080	323950	1485500	0	0	0	73305	502050	52802	131110	0	0	110560	0	0	0	1519900	0	0	0	0	0	0	0	0	357810	64795	0	0	0	0	0	0	0	404850	0	275510	110490	0	0
ETAIEQLEK	295137015	295137015	yes	yes	0.0039396	94.309	1083900	9396.6	26124	24808	97905	130860	0	4189.1	0	6840.4	8310	0	0	8515.3	8281.3	0	7079.8	0	5153.9	0	0	23302	0	5610.8	0	0	0	0	0	0	0	15092	30289	0	0	36497	23484	0	31171	0	0	14210	0
GVLSDLLDNR	295137015	295137015	yes	yes	0.0004756	152.04	7706900	114780	247820	150890	473260	346890	0	0	0	0	0	0	0	0	0	0	0	0	0	283110	52334	0	0	0	0	0	0	0	107540	34514	0	0	0	0	0	0	0	143560	78114	0	0	0	0
GVLSDLLDNRK	295137015	295137015	yes	yes	0.001682	139.32	31053000	253800	428850	367960	1030200	2286000	0	0	0	0	138240	81199	23397	0	0	0	0	0	0	970380	199540	30798	0	0	0	0	0	0	382510	33611	0	0	0	0	0	0	0	538990	206000	58794	0	0	0
LNLINSIYTSLEQFENDK	295137015	295137015	yes	yes	0	352.25	78913000	848570	693030	674070	1787800	4136000	159840	0	0	163330	1240300	965870	152550	88992	48719	67321	50082	0	54853	3082200	516070	120130	0	0	0	0	0	0	1361600	246840	0	28490	0	0	40333	0	0	394120	1384300	624000	0	0	0
LNLINSIYTSLEQFENDKNK	295137015	295137015	yes	yes	4.0548e-96	211.67	172160000	2310800	2333900	1646000	4419500	6801300	423140	0	8146.1	476130	2355500	1065500	728070	406270	492870	532360	293630	0	323800	8661200	1025900	655580	0	0	0	557150	0	0	2683200	617670	100640	277950	0	0	226040	0	165540	1970500	2687400	1433300	1098000	25789	0
TIGATIGMFGSMK	295137015	295137015	yes	yes	1.6353e-51	205.87	93623000	1212900	1299100	1180200	2444200	3258900	186820	58129	79073	193460	453730	427240	188050	60986	151640	122820	134350	5964.4	89177	2544900	507080	138720	87644	19082	0	79970	0	15649	1055800	418890	233730	80605	63949	0	108290	0	50557	1521300	788110	126190	126570	340520	403670
TIHFEQQR	295137015	295137015	yes	yes	0.0090008	94.309	1966900	19724	36576	27136	93733	131730	4093.4	0	0	9612.4	18284	10111	6865.6	5774.9	8340.4	5187.4	3670	0	0	57561	0	8380.8	0	0	0	4428.2	0	0	42875	24165	14061	0	0	0	0	0	8328	38831	34583	18550	0	6033.4	0
VNGYAEIER	295137015	295137015	yes	yes	0.029568	58.592	600750	11575	30508	21225	57777	54874	0	0	0	0	0	0	0	0	0	0	0	0	0	0	0	6735.6	0	0	0	0	0	0	19377	9221.1	0	0	0	0	0	0	0	19514	23177	0	0	0	0
QLSHFETYLGGIK	295137018	295137018	yes	yes	2.9927e-05	112.08	3081100	19288	60063	51278	84190	185740	0	0	0	0	77034	29733	0	0	0	0	0	0	0	396150	0	0	0	0	0	0	0	0	0	0	0	0	0	0	0	0	0	0	0	0	0	0	0
YMTGLPDIVIIVDQQK	295137018	295137018	yes	yes	7.8628e-07	115.58	2180900	61111	0	0	0	0	0	0	0	0	79768	0	0	0	0	0	0	0	0	554600	104290	0	0	0	0	0	0	0	112110	0	0	0	0	0	0	0	0	0	0	0	0	0	0
INAIIGQNK	295137024	295137024	yes	yes	0.0041787	93.178	1114100	15096	19471	19633	87202	0	0	5780.5	0	0	38573	13859	18662	7015.7	0	2926.3	0	0	0	0	0	0	0	0	0	0	0	0	35419	0	0	0	0	0	0	0	0	0	0	9566.9	0	0	0
IVSQIAILK	295137024	295137024	yes	yes	0.0018086	105.98	1187600	0	22237	20669	0	0	0	0	0	0	55552	31183	13297	0	0	0	0	0	0	234590	61119	0	0	0	0	0	0	0	62643	0	16192	0	0	0	0	0	0	37642	0	0	0	0	0
IVTGVPDAIPVIGSSVVELLR	295137034	295137034	yes	yes	4.3005e-07	100.46	3786900	97715	90801	152260	160950	244360	0	0	0	0	28926	0	0	0	0	0	0	0	0	0	0	0	0	0	0	0	0	0	0	0	0	0	0	0	0	0	0	110490	103520	0	47154	0	0
FILNILQIENHFV	295137036	295137036	yes	yes	2.8616e-08	131.79	3522000	0	60504	84161	145740	220970	0	0	0	0	98193	52492	20477	17396	0	0	0	0	0	230020	0	0	0	0	0	0	0	0	0	0	0	0	0	0	0	0	0	38745	0	0	0	0	0
GTPFAAQTAAGNAIQTVVEQGMQR	295137037	295137037	yes	yes	5.2053e-160	225.66	8671900	0	0	118460	0	0	0	0	0	0	357430	72541	43701	0	0	21527	0	0	0	1293800	0	0	0	0	0	0	0	0	181040	29444	0	0	0	0	0	0	0	0	669220	0	545130	0	0
RGTPFAAQTAAGNAIQTVVEQGMQR	295137037	295137037	yes	yes	2.0837e-07	88.976	2270800	0	0	0	0	0	0	0	0	0	0	0	0	0	0	0	0	0	0	0	0	0	0	0	0	0	0	0	0	0	0	0	0	0	0	0	0	0	0	0	0	0	0
MIQPQTYLNVADNSGAR	295137040	295137040	yes	yes	0.00059057	82.877	4649700	0	0	0	225650	366360	0	0	0	0	49311	21727	25509	0	0	0	0	0	0	305450	0	0	0	0	0	0	0	0	85615	0	62715	0	0	0	0	0	0	65783	0	0	0	0	0
GSPEYWVAVVKPGK	295137041	295137041	yes	yes	2.4128e-16	161.21	24272000	268780	243950	201880	499580	903340	0	14970	10378	0	424840	50357	121280	50200	0	32660	33945	0	0	1455400	353790	159240	14998	0	0	0	0	0	497000	112570	150410	59730	0	0	0	0	0	427770	426360	185650	0	89513	0
IFPDKPVTVRPTETR	295137041	295137041	yes	yes	0.0085467	82.705	18366000	159510	0	170670	469420	685130	25431	10051	8424.3	24044	208340	104520	40815	46396	72366	23179	22355	0	0	1091100	271180	146430	17715	0	20312	50148	0	10726	323580	89041	152070	74187	112620	0	79433	0	0	446420	362890	108880	95865	104810	48812
ILYEMGGVPENIAR	295137041	295137041	yes	yes	3.3201e-13	143.05	40829000	465330	694280	410920	955650	1074100	55224	16814	30605	57444	436470	118920	168170	68433	82163	47911	0	0	0	1651900	626690	237760	86708	52613	65404	123290	65607	0	654820	124320	236520	0	338100	0	122410	114870	0	592240	427780	238520	0	109620	0
TQFILSK	295137041	295137041	yes	yes	0.033229	80.455	996960	23085	38932	23897	77089	70186	0	0	0	0	23363	7824.1	4873.3	0	0	0	0	0	0	73501	0	0	0	0	0	0	0	0	27526	7168.9	0	0	0	0	0	0	0	37933	11557	0	0	0	0
YALQALEPAWITSR	295137041	295137041	yes	yes	1.2031e-12	132.23	45533000	476990	567320	570040	1109500	1188300	50592	0	30343	28080	634570	251010	158040	102010	93358	64846	44380	0	0	2142000	513690	205520	0	36340	55843	132020	0	0	568970	177220	0	84417	192540	0	98541	0	0	663200	440800	172170	65681	130350	0
LGATQSHDSIWFAQPIIYSK	295137042	295137042	yes	yes	4.0685e-07	109.37	26408000	214190	218740	171780	738110	931090	0	0	0	0	513060	244460	161880	125020	0	0	0	0	0	2233700	717110	0	0	0	0	0	0	0	503710	271730	0	0	0	0	0	0	0	324110	0	0	0	0	0
LGEFSPTLNFGGFAK	295137043	295137043	yes	yes	4.615e-61	209.22	75852000	1297100	1619100	1507900	0	0	0	94638	116130	0	1280900	0	0	0	451360	0	0	0	0	4349400	0	0	222070	139070	0	0	0	0	1263700	432830	0	0	0	0	244910	0	0	1486700	0	0	0	0	0
GIITAGHR	295137044	295137044	yes	yes	0.0073839	96.492	382300	0	0	7685.4	23394	31678	0	0	0	0	8212.8	0	0	0	0	0	0	0	0	11439	0	0	0	5409.7	0	0	0	0	16832	7498.8	7069.7	0	0	0	0	0	0	16824	10685	0	0	0	0
YSDNLILR	295137044	295137044	yes	yes	2.6372e-06	146.69	4785200	82253	105930	70633	274420	214340	0	0	0	7919.2	39671	21329	16034	16263	17324	0	7684.1	0	0	148560	35796	0	24786	16271	15832	0	0	0	69407	28682	44101	0	0	0	0	0	0	131100	88141	24254	0	22449	0
AFSLAESIFTGNSK	295137046	295137046	yes	yes	2.3826e-273	300.49	67023000	857550	927060	800770	1508100	2330100	111940	0	89946	130230	831160	0	0	373530	0	0	0	6064	0	2951600	467600	0	277410	0	0	0	0	85858	758570	239940	216810	0	265940	0	0	0	170740	1171500	0	363570	0	0	0
QGDSEIAESWFDQAAEYWK	295137048	295137048	yes	yes	6.7499e-20	138.46	4431400	60321	77215	0	89218	0	0	0	0	0	115560	100220	29380	25044	0	13847	0	0	0	327390	71695	0	0	0	0	0	0	0	85590	49458	0	0	0	0	0	0	0	62809	0	0	0	0	0
YILIGGGVSAGYAAR	296511935	296511935	yes	yes	4.376e-14	145.1	10863000	64587	82291	68276	149200	0	50912	47347	0	109120	78582	54229	100640	39579	119530	78485	96664	20759	41354	0	0	0	0	0	56553	189100	114400	0	0	59420	0	103620	190510	0	0	95435	77818	0	66982	100840	0	75702	0
TYGESLAQVLWMIGVNPISDGLGR	357595287	357595287	yes	yes	0.00082456	63.522	138200	0	0	0	0	0	0	0	0	0	0	31561	0	0	0	0	0	0	0	0	0	0	0	0	0	0	0	0	0	0	0	0	0	0	0	0	0	0	0	0	0	0	0
WYEGMLSSGYEGVR	357595287	357595287	yes	yes	0.00012579	108.36	2953000	48774	56432	74618	125930	155000	0	0	0	0	46594	32896	14813	0	0	0	0	0	0	365600	58442	71557	0	0	0	0	0	0	0	29340	0	0	0	0	0	0	0	0	0	0	0	0	0
LPMFGTTDASQVLKELDEVK	550544719	550544719	yes	yes	0.054995	43.946	3044600	57675	33260	0	0	0	0	0	0	0	0	0	0	0	0	0	0	0	0	0	0	0	0	0	0	0	0	0	0	0	0	0	0	0	0	0	0	0	0	0	0	0	0
MATAASAATFSIGTAQTGR	550553961;frv2_74137	550553961	yes	yes	0.014749	57.595	19377000	94410	237350	298860	467880	372250	0	9493.6	0	0	157040	74155	108850	0	0	0	36790	0	0	299180	352820	444820	0	0	30933	0	0	70592	338040	38548	78746	145830	0	0	0	0	0	423140	328120	248370	278800	36920	202320
ASHIVGYPR	662225959;frv2_46863	662225959	yes	yes	0.024378	145.72	105590000	138040	262070	225690	946890	801210	206040	78902	124570	261680	246610	699350	339490	719820	474360	345760	387260	0	456450	470650	1594600	769450	523000	233740	379070	640580	750120	675790	1467200	685570	872100	1723200	2470600	0	2807900	2458000	1496800	554660	1443400	790220	1071800	1057400	1301000
FSQGLAQDPTTR	753534344	753534344	yes	yes	1.9754e-05	133.04	9462900	214110	275840	140950	313060	314690	23685	16649	16199	28768	10896	3845.5	0	0	0	0	0	0	0	25705	0	0	0	0	0	0	0	0	7022.3	0	0	0	0	0	0	0	0	269840	103920	66924	34960	42808	34857
DFIGSSTNVIMVASTTLMLFAGR	753534353;frv2_110844	753534353	yes	yes	6.9007e-38	142.27	37549000	273030	1043600	1441600	1728000	1935600	692670	49604	9342.8	0	290940	190930	23806	12747	5892.5	0	10633	0	4668.7	272160	143330	35069	12382	0	0	0	0	0	299900	25359	90871	0	0	0	0	0	0	20599	485880	101010	38956	0	0
SVFDAYLEK	753534355;frv2_3426;frv2_88159;frv2_47296	753534355	yes	yes	0.00079038	137.95	100280000	1428300	1936000	1318400	3126400	2420700	198150	132200	242680	254830	1270500	608360	442970	498350	689630	261450	127870	0	52428	2869000	953540	422740	381380	421700	172630	142690	114520	62751	2421500	958160	1418200	260820	593990	0	413300	311910	132850	1577200	586210	261200	113060	133760	152080
LNNQDDVLQLLEK	frv2_100427	frv2_100427	yes	yes	5.1928e-65	213.67	91571000	0	282760	0	0	0	553830	253500	438480	853810	0	0	121450	158060	214790	181740	133860	0	292610	0	525050	660230	439790	291890	628350	1248700	1177100	525590	261740	228140	730660	937570	1164900	0	1625900	1848800	907730	391460	778760	427800	778930	1327200	439800
LNNQDDVLQLLEKDVFL	frv2_100427	frv2_100427	yes	yes	8.4208e-47	182.49	47027000	26130	0	58411	0	2022700	26284	35622	0	167730	555290	950990	849190	1997100	2790800	960850	1745300	0	1324600	0	0	42903	43730	8940.8	215380	1696700	14537	128360	0	77462	0	0	0	0	998960	306150	0	0	0	635310	0	0	0
TALHFACGYGEVK	frv2_100427	frv2_100427	yes	yes	0.0087079	103.46	1090200	0	0	0	0	0	0	0	0	0	0	0	0	14528	32041	30118	6701.6	0	0	0	0	0	110750	19563	10270	100410	26807	0	0	0	0	0	187860	0	56259	40686	0	0	0	0	0	0	0
TFVNPNGFTFSK	frv2_100460	frv2_100460	yes	yes	0.0028796	92.295	13825000	0	48507	0	151330	302950	69502	15027	12546	0	42152	77454	56456	55287	63529	33693	61989	0	67620	141940	219620	79188	65362	24534	62489	135350	115890	0	0	36306	107620	0	196700	0	0	0	133990	0	260510	119410	164310	0	107890
ESTMDKESVGFNSENILQPNISSTGNANATTVGSNPK	frv2_100629	frv2_100629	yes	yes	1.2907e-18	86.023	21325000	87702	84822	74401	0	0	208120	99210	69815	244510	0	104520	108300	203750	373350	216250	225240	0	393610	327210	292070	0	143660	50609	232990	668870	579800	0	0	0	80040	337690	313540	0	632140	640090	217130	0	0	0	0	0	0
ESVGFNSENILQPNISSTGNANATTVGSNPK	frv2_100629	frv2_100629	yes	yes	0.016966	35.153	4838200	0	0	0	0	0	96816	46403	0	93141	0	0	23752	0	0	0	0	0	0	0	165490	0	0	0	80816	0	0	48625	0	0	0	0	0	0	0	175040	74985	0	0	0	0	0	0
LWNTEHSPEDVPLALDR	frv2_100629	frv2_100629	yes	yes	9.3721e-05	97.073	24216000	59592	67838	64549	0	445700	188230	75657	65542	257060	90951	74615	94803	137020	140090	151070	210030	0	172740	244340	335640	408900	0	0	201070	485200	310450	277910	0	64873	0	379400	502270	0	589420	709750	453260	0	0	0	0	61581	0
NLVQPNLASTWR	frv2_100629	frv2_100629	yes	yes	7.1511e-12	174.23	20492000	83189	124120	118680	388770	530760	163470	63274	90500	164120	0	130610	124590	122200	288700	113810	155120	0	154010	330460	258760	172480	181430	90026	169840	338220	244900	170250	119490	49754	192560	249050	572790	0	554490	784560	309250	0	0	0	0	0	0
KLNLLPHPEGGFYAETFR	frv2_100707	frv2_100707	yes	yes	0.0035368	69.805	2501700	0	0	0	0	0	0	0	0	0	24515	0	29393	53087	93044	44369	55021	0	46372	0	0	0	0	0	0	0	0	0	0	0	0	0	0	0	459930	208860	95557	0	0	0	0	0	0
AMIEHNLLSASK	frv2_100717	frv2_100717	yes	yes	1.9787e-05	122.52	945040	0	0	0	0	0	0	0	0	0	0	0	0	0	0	0	0	0	0	0	25222	14188	10117	0	0	0	0	0	0	0	0	17245	59208	0	32794	0	9006.4	0	0	11933	0	0	0
YVADLSNKFTQQR	frv2_101292	frv2_101292	yes	yes	0.00017384	112.08	614330	0	0	0	0	35298	0	0	0	0	17949	21967	18731	18127	17997	7850.7	13476	0	9547.2	0	0	0	0	0	0	0	0	0	0	0	0	0	0	0	0	0	0	0	0	12291	0	0	0
VSTVHSMAVLTQSDPPSSGSFDPALQSTLK	frv2_101403	frv2_101403	yes	yes	0.00040243	51.851	5643900	0	0	0	0	0	100920	0	0	0	0	0	0	38150	101920	50456	64131	0	67684	0	118920	157120	0	0	0	130080	0	0	0	0	0	0	0	0	216040	143970	99646	0	0	0	0	0	0
IVSKEDMAAESYDETIASLTELLK	frv2_101519	frv2_101519	yes	yes	0.0019613	56.292	7723600	0	0	0	0	354990	127700	0	0	0	0	0	0	97479	167260	0	108430	0	125390	115010	0	0	0	0	0	0	83087	0	0	37338	0	209890	0	0	298690	0	76383	0	0	117200	0	0	139820
HNSQLAWDAQISQVAGR	frv2_101773	frv2_101773	yes	yes	8.3362e-49	184.2	24993000	35604	48890	32942	182620	498290	169790	50546	108140	99823	82306	84994	72652	89651	422510	73555	129520	0	136430	245100	238490	49899	196500	106360	309160	366390	226780	50639	58335	41315	95276	340650	764630	0	600730	472140	96801	31218	255090	133190	155930	318600	231710
GYEVLYMVDAIDEYAVGQLK	frv2_101812	frv2_101812	yes	yes	3.4858e-127	224.36	99579000	298300	332910	303310	909450	1329100	717670	7808.2	0	575400	77147	177500	24729	535580	317830	196130	551140	12427	376320	1602100	1519500	1657300	52041	0	211490	1660600	553340	383880	728460	126270	553610	1103900	199190	64264	2529600	1957500	737120	314260	2311600	1019000	856680	93895	482440
GYEVLYMVDAIDEYAVGQLKEFEGK	frv2_101812	frv2_101812	yes	yes	4.0201e-07	84.993	5483100	0	0	0	0	0	0	0	0	0	185280	212580	38556	119370	124300	37250	96375	0	21988	0	0	29967	0	0	0	0	0	0	0	0	0	0	0	0	0	0	0	0	66733	92442	0	0	0
GYEVLYMVDAIDEYAVGQLKEFEGKK	frv2_101812	frv2_101812	yes	yes	4.082e-06	83.251	4096300	0	0	0	0	304970	0	0	0	0	50525	186960	17627	29849	16951	19360	116030	0	0	0	0	0	0	0	0	0	0	0	0	0	0	0	0	0	0	0	0	0	0	0	0	0	0
ITLYLK	frv2_101812	frv2_101812	yes	yes	0.010333	114.6	4099200	0	0	0	0	0	25085	0	0	0	0	11380	0	0	0	0	0	0	0	88088	117090	64064	0	0	0	0	0	0	61519	20820	0	87569	149270	0	136050	147500	0	33455	91656	0	0	0	0
ITLYLKEDQLEYLEER	frv2_101812	frv2_101812	yes	yes	9.4427e-71	212.35	40229000	148380	197890	213230	172470	436080	213750	16715	0	90968	198830	536630	83810	528190	711910	703370	539660	0	251510	494100	445000	360540	0	0	74111	681830	0	0	152060	55074	66002	1122200	0	0	895780	439270	59430	82333	440900	736830	916460	0	620490
ITLYLKEDQLEYLEERR	frv2_101812	frv2_101812	yes	yes	0.0043345	81.128	7161600	0	0	0	0	0	0	0	0	0	50493	149490	83992	140280	286470	159510	165390	0	66602	0	0	61747	0	0	0	82095	0	0	0	0	0	0	0	0	125790	0	0	0	150400	262160	0	0	143140
KGYEVLYMVDAIDEYAVGQLK	frv2_101812	frv2_101812	yes	yes	1.6006e-31	141.7	15525000	0	0	126800	214220	1330000	52568	0	0	87810	0	142720	143970	50480	73400	46276	73272	0	185040	135160	153290	127630	0	0	0	318860	0	0	0	0	0	106840	0	0	298830	227190	55823	0	203160	0	181170	0	0
KGYEVLYMVDAIDEYAVGQLKEFEGK	frv2_101812	frv2_101812	yes	yes	5.6573e-72	160.21	1159600	0	0	0	0	0	0	0	0	0	16021	49099	0	0	0	0	12839	0	0	0	0	0	0	0	0	0	0	0	0	0	0	0	0	0	0	0	0	0	0	0	0	0	0
LDGQPELFIHIIPDKTNNSLTIIDSGIGMTK	frv2_101812	frv2_101812	yes	yes	4.1097e-10	80.117	42304000	0	0	0	0	0	219990	0	0	149980	0	76102	121250	301760	184650	311850	530540	0	315260	580380	972700	1512500	0	0	0	2087500	0	0	204660	0	745920	1582500	0	0	2952900	852240	315920	0	729120	834830	2283800	0	172760
MKEGQSDIYYITGESK	frv2_101812	frv2_101812	yes	yes	4.0641e-24	163.44	8315600	0	17075	20306	34992	177610	32898	17848	0	57048	0	28650	19925	34267	105970	52396	56410	0	72515	39385	53963	66753	12256	34352	54489	133380	173570	19444	0	0	80349	105520	160940	0	355270	264350	142540	0	105860	100390	130920	88753	48130
MKEGQSDIYYITGESKK	frv2_101812	frv2_101812	yes	yes	0.002311	85.362	4651700	12346	0	20444	44231	252310	15673	15929	0	15506	0	0	34926	53664	88267	64465	47124	0	57468	39554	0	26305	0	8442.2	0	71291	35474	0	0	21347	42220	81450	42428	0	131860	133490	35089	20575	68415	80687	78435	0	84902
SKLDGQPELFIHIIPDKTNNSLTIIDSGIGMTK	frv2_101812	frv2_101812	yes	yes	2.9121e-27	105.21	46448000	0	0	0	392900	1562700	104020	0	0	0	330470	735130	180730	544490	680360	673500	695250	0	164270	1080300	999470	666740	0	0	0	820080	0	0	273100	72211	0	879280	0	0	1175600	224940	160280	0	797920	1019900	1165400	0	553870
TNNSLTIIDSGIGMTK	frv2_101812	frv2_101812	yes	yes	6.1854e-179	260.58	76887000	132580	19499	163780	600590	1726400	328240	119850	88500	269990	331840	639240	263210	305450	293850	324470	163290	7447.1	85313	960460	1002200	431220	236960	143280	222650	0	352410	87175	318730	180140	74283	416740	628680	0	784560	1144500	204190	356620	1325100	877270	274480	781120	622820
AGLGALGIRPPPPGYEESVEEFVR	frv2_101817	frv2_101817	yes	yes	8.262e-13	104.68	4292400	102930	132440	0	0	209950	0	0	0	0	0	0	0	0	0	0	0	0	0	537550	179850	0	0	0	0	0	0	0	262100	71044	0	0	0	0	0	0	0	156520	0	0	0	0	0
LRPVPGKPADLPFFDLMSIGGK	frv2_101817	frv2_101817	yes	yes	6.7924e-12	118.05	7388700	0	70456	64452	339100	683950	0	0	0	0	126580	45276	0	19017	0	0	0	0	0	395700	0	0	0	0	0	0	0	0	213960	0	0	0	0	0	0	0	0	0	111700	0	0	0	0
ILQADSVLFASPEYNYSLTAPLK	frv2_102052	frv2_102052	yes	yes	2.1684e-06	91.883	5747300	0	0	0	0	0	0	0	0	0	0	0	0	0	0	0	0	0	0	0	0	0	0	0	0	0	0	0	0	0	0	0	0	0	0	0	0	0	825960	258570	526430	480300	535690
SALIALDSLLQTVPSDVLSK	frv2_102208	frv2_102208	yes	yes	3.6469e-70	188.54	20656000	120960	189300	154850	360320	776770	40801	0	0	35086	145810	94914	45182	75867	182630	50340	22485	0	15033	662080	103710	0	0	0	0	49320	0	0	163570	56728	0	42284	0	0	0	0	0	156100	0	102810	0	0	30222
IWQIQNSHAPFNPNDPFLSK	frv2_102267	frv2_102267	yes	yes	0.07391	35.089	2219900	0	0	0	0	0	0	0	0	0	0	37545	0	0	86124	71214	0	0	0	0	0	0	0	0	0	0	0	0	0	0	0	0	0	0	297360	0	107140	0	0	0	0	0	0
ALLQGTTQDHLQIFNIELK	frv2_102274	frv2_102274	yes	yes	0.0058819	60.307	13004000	0	0	67846	0	494260	114910	0	0	63660	24334	124890	56819	94998	0	93134	104030	0	0	0	432820	256560	0	0	0	172310	102770	0	0	0	0	544790	0	0	351210	0	0	0	221970	220490	0	0	0
ETTPQNSVVIVDMSMPNQPLR	frv2_102274	frv2_102274	yes	yes	8.7504e-09	105.68	13336000	0	0	0	0	0	100660	26160	68790	113880	0	0	0	27946	0	0	44370	0	0	0	187020	148420	124280	59923	0	375630	352440	0	0	0	0	253580	296570	0	536560	410300	180860	0	0	0	252370	374890	257520
AQLQGTTQDHLQIFNIELK	frv2_102276	frv2_102276	yes	yes	0.028664	46.337	13334000	0	0	0	107340	387260	93028	13668	0	0	0	55545	33592	0	79958	57571	0	0	0	0	170780	112440	0	0	67552	278150	0	0	0	50212	0	498760	203840	0	557010	328830	137110	0	197800	201620	297100	166580	155180
ETSPQNSVVIVDMSMPNQPLR	frv2_102276	frv2_102276	yes	yes	0.0030125	63.125	8357900	0	0	0	0	0	0	0	27375	92883	0	0	0	0	0	0	0	0	26313	0	141860	142970	48179	24877	60074	215480	151660	46711	0	0	24646	152040	225640	0	288180	247150	0	0	119670	104190	152190	197360	178170
AFWTESFVQWSPLGTYLATVHR	frv2_102293	frv2_102293	yes	yes	2.9404e-33	145.17	3413100	0	0	0	0	374280	0	0	0	0	23824	46254	0	0	0	0	27876	0	19321	0	0	96736	0	0	0	0	0	0	0	0	0	0	0	0	0	0	0	0	0	0	57958	0	0
DFKGSADDFAIGGTGGVTGVSWPVFK	frv2_102293	frv2_102293	yes	yes	0.0061361	47.331	3467500	0	0	0	0	0	0	0	0	0	0	120600	48009	105950	0	0	91476	0	141480	0	0	0	0	0	0	0	0	0	0	0	0	0	0	0	0	0	88547	0	0	0	0	0	0
DYAPGENLQQWLTDAK	frv2_102293	frv2_102293	yes	yes	6.84e-05	105.06	15736000	0	64869	0	181320	0	0	29892	0	107970	0	120710	109870	93450	91353	76951	82247	0	75699	0	157750	184810	61938	29283	93532	312990	167330	53269	115780	0	0	192520	186530	0	0	0	172060	104270	0	180930	0	152420	0
GSADDFAIGGTGGVTGVSWPVFK	frv2_102293	frv2_102293	yes	yes	4.8677e-51	157.01	14346000	0	0	0	0	0	165350	0	30444	0	0	0	0	62098	89259	47173	58287	0	70462	0	332640	183060	0	0	88914	354100	378570	90907	0	0	0	0	262270	0	443970	0	272770	0	373900	144520	274150	224090	153460
IFSQIGVIKDDGFWMPVDPATEK	frv2_102293	frv2_102293	yes	yes	0.0062945	52.99	6704100	0	0	0	0	0	127120	0	0	0	0	72217	57914	0	90994	84785	58993	0	60802	0	0	154960	0	0	0	150640	99130	0	0	0	0	196560	0	0	230740	0	0	0	0	122380	0	0	0
QGAAVWGGATTFNR	frv2_102293	frv2_102293	yes	yes	0.0044043	77.372	3813900	0	0	13598	0	227100	0	10811	0	37750	25798	33926	0	0	0	0	0	0	0	0	99531	72952	0	0	0	0	0	0	0	28211	75999	0	0	0	0	0	0	0	96850	0	65729	0	60014
SLKVENIMDFSWSPTDPIISLFVPETGGGNQPAR	frv2_102293	frv2_102293	yes	yes	0.0062443	37.117	1644600	0	0	0	0	0	0	0	0	0	50942	71739	0	0	0	0	0	0	0	0	0	0	0	0	0	0	0	0	0	0	0	0	0	0	0	0	0	0	0	0	0	0	0
VENIMDFSWSPTDPIISLFVPETGGGNQPAR	frv2_102293	frv2_102293	yes	yes	0.0064468	38.553	676830	0	0	0	0	0	0	0	0	0	0	0	0	0	0	0	0	0	0	0	0	0	0	0	0	0	0	0	0	0	0	0	0	0	0	0	0	0	0	0	0	0	0
VIINIFDVR	frv2_102293	frv2_102293	yes	yes	0.00082501	145.25	9512100	0	0	0	0	0	0	23670	23580	81410	18740	0	35265	0	0	0	0	0	58614	75860	0	84134	28951	0	0	195080	132720	47452	70276	19280	36838	112190	119450	0	120290	134270	136360	0	0	141210	221910	266500	210130
VSLVSIPSKEELR	frv2_102293	frv2_102293	yes	yes	0.0035899	97.631	12654000	0	0	0	0	0	67111	30658	11214	96265	0	0	0	26913	0	45653	0	0	102290	0	80176	79557	80660	39748	83428	213700	184200	45705	0	30993	0	111590	311410	0	425260	458390	177790	0	138950	0	330570	279000	154860
YLVTYSSHEPSNPR	frv2_102293	frv2_102293	yes	yes	5.0307e-05	110.44	1571600	0	0	0	0	39353	6770.3	0	0	11118	0	5693.2	7267.6	8550.4	13501	9477	8932.8	0	14587	29413	11971	11668	13793	0	8792.8	16159	16615	0	0	0	18321	22231	23681	0	40177	31839	17454	0	18579	15526	21377	0	29221
GLGNWGSSSNFNKPEFGAGR	frv2_102329	frv2_102329	yes	yes	0.00080914	73.498	564120	14200	0	0	0	91442	0	0	0	0	0	0	0	0	0	0	0	0	0	0	0	0	0	0	0	0	0	0	0	0	0	0	0	0	0	184440	0	0	0	0	0	0	0
AHVTLVDAFR	frv2_102339	frv2_102339	yes	yes	0.00010401	123.11	4455600	0	19439	14436	0	0	20331	12365	15383	0	0	12778	9111.3	13793	19953	14336	12883	0	8591	32019	47362	44484	30920	24744	56218	51243	40147	0	40393	0	43259	72933	116580	0	0	0	0	27478	85747	51768	104270	82455	77429
DVVSSYLDSGGSVDEQGVEDAFELLHEMSER	frv2_102339	frv2_102339	yes	yes	0.0024914	43.956	1513500	0	0	0	0	0	0	0	0	0	0	39963	0	0	0	0	12970	0	0	0	67620	0	0	0	0	56293	0	0	0	0	0	46432	0	0	231160	106660	0	0	0	0	0	0	0
GVYHPAQEYVNHANK	frv2_102339	frv2_102339	yes	yes	1.8319e-06	116.9	3727100	6642.9	5456.1	0	32204	40683	6314.6	0	0	0	13452	16636	0	18590	24884	21709	7899.6	0	7244.1	18226	65436	12192	0	0	8860.4	60662	12940	0	10110	0	13527	74358	119000	0	177380	123170	0	8116.2	76462	11716	63359	81143	16758
LQVYNPQSETSVSR	frv2_102436	frv2_102436	yes	yes	0.0019283	84.62	2198900	18410	21540	0	58723	60497	20275	12093	13036	22684	0	0	0	5888.1	0	0	0	0	0	0	22177	0	0	21126	22540	0	55972	0	0	0	19470	0	65465	0	54634	45004	28271	0	0	0	0	0	0
LSASAAPFNPSPAIAR	frv2_102436	frv2_102436	yes	yes	1.2533e-06	112.57	14512000	56467	93794	73370	217590	338520	75849	31274	33493	78770	0	35230	23346	34779	0	34174	29726	0	44909	145940	84212	66137	78229	86312	63784	106910	104620	69252	61871	0	63563	115560	277600	0	178070	160640	81515	83105	151300	56487	79733	126380	67592
GLLLLAEMSSAGNLAK	frv2_102446	frv2_102446	yes	yes	4.6476e-05	107.13	1201000	0	0	44718	92104	0	0	0	0	28559	0	0	0	0	0	28362	0	0	0	0	88006	0	0	0	0	94272	0	0	0	0	0	0	0	0	0	0	0	0	0	0	0	0	0
IEPLPFDIPSILLDDASTR	frv2_102529	frv2_102529	yes	yes	0.024788	53.768	383520	0	0	0	0	0	0	0	0	0	0	0	0	0	0	0	0	0	0	0	0	0	0	0	0	0	0	0	0	0	0	0	0	0	0	0	27645	0	0	0	56099	11648	37821
IVSLETFKPLPPNQLGEIWFR	frv2_102529	frv2_102529	yes	yes	0.0046404	60.062	2629800	0	0	0	0	0	0	0	0	0	81089	0	0	0	0	40410	40827	0	56404	0	0	0	0	0	0	0	0	0	0	0	0	50318	0	0	0	0	96688	0	348800	164030	210140	0	0
LMEDVVPFFQSVKLPQSAVTAEDCMVEMAK	frv2_102582	frv2_102582	yes	yes	0.016354	62.582	3922200	0	0	0	0	0	0	0	0	0	0	333390	0	0	0	0	0	0	0	0	0	0	0	0	0	0	0	0	0	0	0	0	0	0	0	0	0	0	0	0	0	0	0
NDYGNFPIYIHENGQLSPR	frv2_102704	frv2_102704	yes	yes	1.6836e-28	148.19	14465000	0	0	0	0	0	0	0	0	53879	0	0	29485	32261	35536	0	23376	0	200630	0	113440	116040	0	35332	0	55079	0	116070	0	0	56309	0	194280	0	608770	1814200	351330	0	169000	0	83246	0	111620
IFFTGSPRVASIVMTSAAR	frv2_102708	frv2_102708	yes	yes	0.020373	88.427	40862000	0	0	0	0	0	0	0	0	0	0	0	0	0	0	0	0	0	0	0	0	0	0	0	0	0	0	0	0	0	0	0	0	0	0	0	0	485960	2117200	1292500	1553800	1406600	1366600
IQESIEFINSK	frv2_102708	frv2_102708	yes	yes	0.047607	56.404	736600	0	0	0	0	0	0	0	0	0	0	0	0	0	0	0	0	0	0	0	0	0	0	0	0	0	0	0	0	0	0	0	0	0	0	0	0	0	0	0	0	0	0
VASIVMTSAAR	frv2_102708	frv2_102708	yes	yes	0.059623	54.005	478480	0	0	0	0	0	0	0	0	0	0	0	0	0	0	0	5620.1	0	0	0	0	0	0	12099	0	17353	0	0	0	0	0	19458	0	0	56436	25373	0	0	0	0	0	0	0
EDNGKFYSGDCYIVLYTYHSGER	frv2_102709	frv2_102709	yes	yes	0.056149	38.379	13855000	0	0	0	0	0	219270	45510	0	95414	0	0	0	0	0	0	0	0	68429	0	0	0	0	0	249950	0	0	44597	0	0	0	618360	0	0	242240	637270	458940	0	0	0	0	0	0
ESPQFVALFQPMVVLK	frv2_102709	frv2_102709	yes	yes	2.2036e-21	153.41	10567000	0	0	0	0	0	89391	10133	0	0	0	0	0	0	0	55022	46245	0	53198	0	0	231060	0	0	49765	168580	112240	46589	0	0	0	320250	154500	0	254300	135720	126280	0	262390	0	192420	135920	0
GLPDETYTAESIALVR	frv2_102709	frv2_102709	yes	yes	1.6397e-20	147.83	11049000	0	71723	0	98072	0	82606	29383	49551	103450	0	0	0	56964	0	62670	54830	0	88592	0	94147	86115	102530	46231	57021	0	145490	40562	0	38916	0	202620	206640	0	291920	280680	167680	0	0	152740	0	284920	0
LFDGKESPQFVALFQPMVVLK	frv2_102709	frv2_102709	yes	yes	0.03527	45.347	1972700	0	0	0	0	0	0	0	0	0	0	79799	30138	39522	104170	49489	69363	0	0	0	0	0	0	0	0	100550	0	0	0	0	0	0	0	0	0	0	0	0	0	0	0	0	0
VAEFLRPGIALK	frv2_102709	frv2_102709	yes	yes	0.00011371	121.68	14607000	0	0	0	72685	100930	88118	16827	13840	63814	13747	55703	28412	20842	35108	25764	20209	0	83527	67317	173110	132620	76355	61286	57502	208280	171490	93409	32750	22034	71737	155660	421660	0	351370	366450	184130	0	216370	143070	259430	295450	154550
VIQGYETHSFK	frv2_102709	frv2_102709	yes	yes	0.00035745	120.55	8159100	10297	7978.7	13940	55002	90343	31651	19153	23057	47563	3753.6	24418	21915	28336	35712	38919	37535	0	32096	32413	52469	60358	66816	40117	53759	113380	101590	28705	24536	21421	49978	80678	93999	0	239530	213130	103350	21300	20684	53337	73630	128880	73932
VISEDDIVPETIPAQLYSIADGEAK	frv2_102709	frv2_102709	yes	yes	0.024274	38.724	3896700	0	0	0	0	0	0	0	0	0	0	0	98376	42674	93414	0	31179	0	32080	0	0	0	39073	18395	65461	0	170530	0	0	0	0	0	0	0	254420	0	0	0	0	0	179560	84623	0
ALEVIQLLK	frv2_102711	frv2_102711	yes	yes	0.00061354	152.11	10139000	0	39294	0	130410	255550	53701	21997	23787	54923	0	41510	29181	44392	88057	52494	47125	0	55501	0	100150	117180	77442	38478	75366	148120	127720	38135	0	0	60199	119820	161770	0	170800	178490	120720	38700	108050	132600	125590	155010	122170
FYMGDSYIILQTAQGK	frv2_102711	frv2_102711	yes	yes	1.764e-46	187.75	15143000	115590	117030	0	206960	521170	68796	23680	0	81080	0	76851	53910	65009	89429	70384	84238	0	75855	0	194390	149220	77210	23385	50371	158940	120470	0	0	0	0	216340	0	0	187650	0	115900	0	242990	135730	228460	138610	224930
GLEPAFQGVGQK	frv2_102711	frv2_102711	yes	yes	0.0092775	73.435	1262400	0	0	0	0	0	0	0	0	0	0	0	0	10392	24055	0	0	0	0	0	0	18528	34531	10972	11145	23757	17292	11678	0	6933.3	16520	34008	48392	0	99795	36197	33994	0	0	0	0	30429	0
IENFQPVPLPK	frv2_102711	frv2_102711	yes	yes	9.1941e-09	171.92	14484000	30294	22992	41377	148110	243080	61101	18503	0	74532	21191	44468	31516	53620	98345	41369	40667	0	76963	0	89553	97829	112220	39970	63980	169500	183450	61551	44345	0	89261	155960	323850	0	354190	336800	179910	60279	136350	127460	187720	245490	149580
NPNDPLAAQNFQVLGEAYQVLSDPAQR	frv2_102762	frv2_102762	yes	yes	0.0073062	44.167	3213000	0	0	0	0	0	0	0	0	0	0	73206	0	88883	0	0	0	0	89758	0	102190	0	0	0	95974	0	90171	0	0	0	0	0	0	0	164280	0	0	0	0	0	0	0	0
AFTDRDGLSGMQWHK	frv2_102814	frv2_102814	yes	yes	7.3086e-18	161.21	5832000	0	0	0	0	0	26310	15354	15351	131200	0	0	0	14927	14036	38383	29503	0	164070	0	16598	0	11690	0	33773	112330	96535	144490	0	0	0	67345	81517	0	134060	126010	236040	0	0	33439	38048	0	46067
HASLVLSGQLT	frv2_102814	frv2_102814	yes	yes	0.013897	72.289	633860	0	0	0	0	0	0	0	0	26161	0	0	0	0	0	0	0	0	23902	0	0	0	0	0	0	18038	0	35660	0	0	0	0	43918	0	20516	37844	74293	0	0	0	0	0	0
HLIYGPSK	frv2_102814	frv2_102814	yes	yes	0.015021	88.819	1351400	0	0	0	0	0	0	0	5342.6	26932	0	0	0	0	0	6912.1	8180.6	0	26038	0	3652.9	6814	10119	7789.9	8912	23413	30449	40404	0	0	0	16044	33316	0	39338	36745	76912	0	0	0	0	0	4753.5
HNGYGSQSFPGIGDAVQMAK	frv2_102814	frv2_102814	yes	yes	6.6403e-09	113.23	4035000	0	0	0	0	0	17284	0	0	192570	0	0	0	0	0	0	21153	0	163250	0	0	0	0	0	34783	154840	175500	102060	0	0	0	0	0	0	105350	144500	276550	0	0	0	0	0	0
AIDMPLDSDVFAVPSGYNAPQQVHITQGDLVGK	frv2_102917	frv2_102917	yes	yes	1.3642e-27	105.79	115280000	0	0	0	0	1198800	731530	164800	296220	1012300	0	159800	222030	414210	915380	758910	780380	0	925700	0	411520	736280	0	59942	458200	2791700	2117500	716930	0	0	112830	1058900	1217300	0	1960300	1120700	1352800	0	761180	492770	1413600	1615000	1436100
AVIVSWVTEDEPGSNTVR	frv2_102917	frv2_102917	yes	yes	3.0379e-58	193.54	49283000	38644	0	0	0	257370	371780	144570	228710	540350	0	37655	44946	150570	334520	290910	253470	0	719970	0	147430	163460	162430	108090	367410	933240	1443300	1131200	0	0	72178	493590	515480	0	1195400	0	704950	0	0	0	661980	687670	553210
DEVAALAFEDMLSWMHEGGQVGIFDATNSNR	frv2_103161	frv2_103161	yes	yes	0.0032479	42.923	746220	0	0	0	0	0	0	0	0	0	0	0	0	0	0	0	0	0	0	0	53485	0	0	0	0	0	0	0	0	0	0	0	0	0	0	0	0	0	0	0	0	0	0
DTFGHGTHTASTAAGNVVSGASYYGLATGTSK	frv2_103190	frv2_103190	yes	yes	4.8395e-45	126.04	19461000	0	0	0	0	0	98924	43135	33935	71799	0	168430	95144	135920	421730	123450	101690	0	64839	0	272780	93890	52802	53416	117610	227330	192440	0	0	58190	65167	268630	555140	0	552680	337260	102530	60321	258810	148820	263850	433710	222720
ISIVEELGGLGLVHITDSEGAVANNYK	frv2_103190	frv2_103190	yes	yes	6.1678e-05	64.349	3986800	0	0	0	0	0	0	0	0	0	0	76504	0	0	0	0	0	0	0	0	272770	0	0	0	0	0	0	0	0	0	0	0	0	0	0	0	0	0	331230	0	0	0	0
NIIKPDIAAPGVTILAAWIGNDEK	frv2_103190	frv2_103190	yes	yes	0.0028972	54.869	3692400	0	0	0	0	0	0	0	0	55407	0	61904	0	27358	0	0	0	0	0	0	0	112290	0	0	0	83844	0	0	0	0	0	0	0	0	100630	0	51943	0	0	0	0	0	0
SAIMTSATQINNMK	frv2_103190	frv2_103190	yes	yes	7.097e-105	234.52	10108000	0	31433	30895	70605	0	32590	13960	17852	29507	0	72035	47187	60317	105020	47003	38511	0	0	0	160980	72453	73228	45549	56507	130880	84331	33318	23387	39675	45695	117860	264240	0	190640	146470	51418	31701	152180	62659	0	137660	78480
SRNPTWSASAIK	frv2_103190	frv2_103190	yes	yes	0.054379	73.36	572940	4861.8	0	0	22490	38542	3932.9	0	0	0	0	8845.4	10258	9186	11604	5027.6	6990.1	0	6325.5	0	19258	8232.1	0	0	0	8209.1	0	0	0	0	9975.7	0	14264	0	0	0	0	8432.2	23983	16622	9432.2	11333	0
VQLVPEKLQFTK	frv2_103190	frv2_103190	yes	yes	0.046656	54.343	1483100	0	0	29861	0	0	0	0	0	0	0	45503	30185	22698	50426	20746	17949	0	0	0	38026	0	0	0	0	20279	0	0	0	0	0	0	0	0	0	0	0	0	72342	46392	0	0	0
LILDLAPTFESEETSYGTLYNSFHELESDYEK	frv2_103596	frv2_103596	yes	yes	0.038667	29.287	1750300	0	0	0	0	0	0	0	0	0	0	0	0	0	0	0	0	0	0	0	0	0	0	0	0	0	0	0	0	0	0	68757	0	0	244710	0	0	0	315910	195920	0	0	0
TIEEGGDSYNNLIQLIDELK	frv2_103596	frv2_103596	yes	yes	0.00020219	85.737	946180	0	0	0	0	0	0	0	0	0	0	0	0	0	0	0	0	0	0	0	0	0	0	0	0	0	0	0	0	0	0	0	0	0	0	0	0	0	0	82167	0	0	81252
GNPDIVPSLLTLAINDALTYDKETK	frv2_103634	frv2_103634	yes	yes	3.9651e-22	119.18	68494000	0	0	0	0	0	0	0	0	0	0	0	0	0	0	0	0	0	0	0	0	0	0	0	0	0	0	0	0	0	0	0	0	0	0	0	0	1159700	2600100	1457100	661400	0	240400
QLAVLSAFIGPDQDATEALLASDSDVAPWVQK	frv2_103634	frv2_103634	yes	yes	4.7531e-35	117.15	57293000	0	0	0	0	0	0	0	0	0	0	0	0	0	0	0	0	0	0	0	0	0	0	0	0	0	0	0	0	0	0	0	0	0	0	0	0	79132	2929600	775300	134940	0	0
EASIEQPTTSATEMYNQPFVIGVAGGAASGKK	frv2_103908	frv2_103908	yes	yes	0.00067286	48.854	3796100	0	0	0	0	0	0	0	0	0	0	0	40641	70062	0	67176	67363	0	63613	0	0	0	0	0	94624	221130	0	0	0	0	0	0	0	0	271550	167900	0	0	0	0	149910	0	203730
GSINMLNAPLMLIQVTRLK	frv2_104079	frv2_104079	yes	yes	0.0028139	92.096	259540	0	0	0	0	0	0	0	0	0	0	0	0	0	0	0	0	0	0	0	0	0	0	0	0	0	0	0	0	0	0	0	0	0	0	0	0	259540	0	0	0	0	0
ILNNIVTR	frv2_104169	frv2_104169	yes	yes	1.7419e-06	171.53	6192200	58641	212080	296270	0	0	0	0	0	0	0	0	30337	0	0	0	0	0	0	0	0	183780	21839	0	45409	0	0	0	139770	0	35452	70918	0	0	0	55512	0	0	0	46978	0	0	0
ALPEDVIEGWRPK	frv2_104383	frv2_104383	yes	yes	0.051735	71.933	4850200	0	0	0	0	0	30784	17490	35552	41698	0	39817	0	0	67902	31463	26954	0	27589	0	0	93962	69754	0	46574	71067	0	30886	0	0	0	113420	180900	0	110640	132650	63210	0	0	0	53357	0	0
DPNDGTEQALLDELSIFNDYLK	frv2_104383	frv2_104383	yes	yes	2.9777e-09	105.38	1138800	33939	0	0	0	0	0	0	0	0	0	13341	0	0	0	0	0	0	0	87392	0	0	0	0	0	0	0	0	43655	16026	0	0	0	0	0	0	0	0	0	0	0	0	0
IFSTFIGFLK	frv2_104383	frv2_104383	yes	yes	3.1516e-75	237.44	36915000	297570	538450	557900	1425600	1634600	93174	24088	10739	75797	363090	227530	116920	112740	159040	102810	134630	46956	64136	939290	274470	218400	0	0	50830	110620	0	62067	393980	140790	0	196340	54212	0	189920	55974	140440	374810	346790	181370	123790	32961	127420
KWAVPDSLNFLK	frv2_104383	frv2_104383	yes	yes	0.0053289	96.334	4136900	26727	47269	51229	180070	242340	0	0	0	0	78075	35078	33695	0	62871	19847	19510	0	0	239240	100460	0	0	0	0	0	0	0	83505	37392	0	0	0	0	0	0	0	58040	0	0	0	0	0
LYHLEIVLGHYK	frv2_104383	frv2_104383	yes	yes	9.3213e-06	143.97	8385400	49528	25281	51458	231340	421070	43514	0	0	64401	69990	18303	21534	16413	61916	28365	9418	0	0	407910	153680	145790	0	0	0	68662	0	0	197930	33281	0	0	0	0	0	0	0	57458	184020	41333	41787	106480	0
NKPEWFLEISPEGK	frv2_104383	frv2_104383	yes	yes	4.8678e-08	124.5	13094000	91520	71351	47676	154680	204060	121020	0	0	69681	0	0	0	0	0	0	0	0	0	967040	339870	0	0	0	0	0	0	0	0	59192	31937	0	236400	0	114010	0	58017	177890	285030	54386	0	0	0
NKPEWFLEISPEGKVPVINIDGK	frv2_104383	frv2_104383	yes	yes	9.8112e-05	84.327	12716000	0	0	0	589400	1516200	0	0	0	0	706060	0	233250	355100	0	0	272470	0	0	564730	0	0	0	0	0	0	0	0	0	0	0	0	0	0	0	0	0	0	0	0	0	0	0
SKDPNDGTEQALLDELSIFNDYLK	frv2_104383	frv2_104383	yes	yes	8.7415e-40	146.72	86009000	744350	544020	434950	798300	2258600	408020	0	0	332780	1096400	878320	229120	557050	480320	194750	246470	0	263820	3790400	1007900	639980	0	0	74378	733740	174390	0	1370800	598230	542920	585050	124580	0	1207300	401560	273760	654050	1220500	581030	415900	0	256080
SKDPNDGTEQALLDELSIFNDYLKENGPFINGK	frv2_104383	frv2_104383	yes	yes	0.00032473	52.427	3312800	0	0	0	0	362080	0	0	0	0	148830	203080	25620	60694	97216	28205	51083	0	26544	267190	0	0	0	0	0	0	0	0	0	0	0	0	0	0	0	0	0	0	0	0	0	0	0
VPVINIDGK	frv2_104383	frv2_104383	yes	yes	0.007384	87.806	7377100	64668	74449	40210	192200	95438	20691	0	8239.5	37114	32071	18113	10231	15647	13968	7698.8	6949.1	0	0	169350	70616	54957	30052	12489	0	36584	31363	0	113980	58888	90432	32236	97096	0	121990	69683	64090	72948	68666	21925	37650	45564	24083
WAVPDSLNFLK	frv2_104383	frv2_104383	yes	yes	5.6087e-07	166.69	51157000	328070	530410	511430	1395900	1323300	147230	44739	45553	151990	505860	284070	233630	237340	289520	154750	173500	6604.1	113000	1497500	625970	344610	89503	40959	142760	272460	113010	75478	606530	257980	136490	243680	298520	0	363420	198440	345930	506570	554730	282810	208360	213780	166100
WVPDSDVITQILEEK	frv2_104383	frv2_104383	yes	yes	2.8992e-09	122.08	16499000	161040	139450	0	161280	0	109780	0	12570	125400	77077	77782	26908	43997	54141	35493	0	0	23040	749570	424000	164540	19181	0	0	106440	104480	0	349350	155570	0	87667	132030	0	203720	0	67255	0	220220	68182	0	0	0
WVPDSDVITQILEEKYPSPPLVTPPEK	frv2_104383	frv2_104383	yes	yes	1.6573e-08	90.378	96666000	566640	489130	465180	1343800	3537400	366930	12891	0	289250	1437200	1155300	724220	695440	1075100	639710	466010	0	463840	3334300	743410	691600	0	0	0	877170	149800	0	929840	651980	0	622760	0	0	809630	0	291000	655100	1142200	682840	522760	57433	350580
DLLNQVVSFIK	frv2_104859	frv2_104859	yes	yes	4.3231e-19	168.83	9080200	52925	0	71941	233830	285320	63589	6686.4	0	28154	43633	44184	30681	33849	52794	51244	35566	0	21488	0	0	77692	0	0	33650	55846	21605	0	144400	41361	0	129540	41843	0	156900	0	0	86592	0	63917	111460	45831	74589
AIHDQNFTGK	frv2_104966	frv2_104966	yes	yes	0.044125	57.347	780830	0	0	0	0	16855	0	0	3012.8	5747.4	0	0	0	0	10002	5388.4	5359.6	0	8311.1	5626.2	8324.8	6966.9	7469.2	6812	8716.5	15744	13715	5877.9	5489.6	5907.6	9646.5	16266	30675	0	0	0	0	0	15448	9367.9	15835	0	14980
LIGHQVNVQMEYSR	frv2_104966	frv2_104966	yes	yes	2.3883e-13	144.8	3903100	4427.6	0	0	0	37761	5061.5	16532	21609	40430	0	5938	5714.4	25250	69376	46230	31470	4542.7	28690	0	49522	31489	49294	18859	53705	130900	118750	26633	22919	17155	29556	98871	240040	0	205590	223420	72415	0	0	0	0	0	0
LQTSFGSDRIPDLR	frv2_104966	frv2_104966	yes	yes	0.0013762	87.641	26207000	9613	80335	42493	149540	259430	136730	19514	24560	138540	43059	102890	55562	69963	196650	56325	143430	0	184630	131550	373940	206270	66546	32058	122360	416640	121060	143060	111180	36520	83638	300040	673920	0	399410	342920	144500	0	662890	347810	666710	329930	534570
TGTFLGSLWESK	frv2_104966	frv2_104966	yes	yes	2.2147e-11	169.89	17345000	0	0	23191	131910	209840	128770	34973	15853	118480	62556	89231	68426	69492	106480	86387	105930	0	107570	124770	0	118100	66896	29846	88058	262690	221870	65630	88992	57244	0	0	156280	0	399030	220570	176780	0	318190	232780	329150	355270	273990
TPSHNLVWDVATGSGQAAK	frv2_105010	frv2_105010	yes	yes	1.1322e-126	228.19	38534000	0	0	0	81643	359000	74283	32435	30491	83897	183110	274720	274350	456170	740800	323050	284510	0	368350	212550	222860	215210	203180	112650	156260	298850	191860	39104	210150	158260	306280	629350	1297900	208620	1520700	1119200	470770	219600	880470	430200	554370	1042600	584250
ESLEEQEK	frv2_105035	frv2_105035	yes	yes	0.03141	76.1	82146	0	0	0	14182	28440	0	0	0	0	0	0	0	0	0	0	0	0	0	0	0	0	0	0	0	0	0	0	6327	0	0	0	0	0	0	0	0	0	0	0	0	0	0
ICGAATSSTYSTASNSLQVFVSSSFSTPAK	frv2_105035	frv2_105035	yes	yes	0.065143	26.952	1486200	0	0	0	0	0	90119	0	0	32916	0	0	0	0	0	0	0	0	0	0	0	0	0	0	0	0	0	0	0	0	0	187100	0	0	0	0	71467	43168	0	0	0	0	0
TEVGYTQGLVHNPAYEDVCAGTTNHSEVVR	frv2_105035	frv2_105035	yes	yes	0.036785	31.923	628800	0	0	0	0	0	0	0	0	0	0	0	0	50518	76304	70843	0	0	0	0	70077	0	0	0	0	0	0	0	0	0	0	0	0	0	0	0	0	0	0	0	0	0	0
LVLCFLMLLSNANSSYASLPLNGTEIVMFR	frv2_105531	frv2_105531	yes	yes	0.066571	26.766	540990	0	0	0	0	0	0	0	0	0	0	0	0	0	0	0	0	0	0	0	0	0	0	0	0	0	0	0	0	0	0	0	0	0	0	0	0	0	0	0	0	0	0
QTANAMVSTGLVDLGYK	frv2_105531	frv2_105531	yes	yes	1.2357e-10	124.45	1746100	0	0	0	91770	226100	0	23420	0	0	35337	0	0	0	136840	0	0	0	0	0	0	0	106100	59577	0	117360	0	0	0	0	0	0	0	0	0	0	0	0	0	0	0	0	0
KTQLILDAVK	frv2_105536	frv2_105536	yes	yes	0.037831	81.676	3871500	14458	23745	0	38041	201250	17394	11771	0	28876	11932	20483	17148	19266	36406	17064	18845	0	15337	77666	0	49660	0	12757	0	0	0	0	0	0	0	0	0	0	0	0	0	33288	93631	41272	0	65072	34755
APGFAHLQGLDFMSK	frv2_106227	frv2_106227	yes	yes	0.007107	71.08	5193900	0	0	0	0	161300	39210	14450	0	56605	0	0	16723	0	0	0	20559	0	25375	0	161550	154220	0	0	41849	142470	92878	0	0	0	0	0	0	0	0	116750	167340	0	0	86257	0	81813	0
VLIFTPLITNPVSTAPSFFLGEK	frv2_106235	frv2_106235	yes	yes	8.6584e-06	88.976	2179200	0	0	0	0	0	0	0	0	0	0	0	0	0	0	0	0	0	0	0	0	0	0	0	0	0	0	0	0	0	0	0	0	0	0	0	0	0	287830	229320	196040	52232	64357
IVMEAALLAGR	frv2_106949	frv2_106949	yes	yes	0.0043718	104.43	192100	0	0	0	0	0	0	0	0	0	0	0	0	0	0	0	4651.9	0	0	0	0	0	21512	6772.9	0	0	0	0	0	0	0	0	0	0	0	0	0	0	0	0	0	0	0
DYGDSFVSVEHLVLGFIQDQR	frv2_107236	frv2_107236	yes	yes	0.00035439	72.772	454230	13923	0	0	0	0	0	0	0	0	21563	20667	0	0	0	0	0	0	0	105690	0	0	0	0	0	0	0	0	30688	0	0	0	0	0	0	0	0	0	0	0	0	0	0
IVGESAGSMLGR	frv2_107236	frv2_107236	yes	yes	0.00036309	107.09	347340	0	0	0	0	0	0	0	0	0	0	0	0	0	0	0	0	0	0	139740	0	0	0	0	0	0	0	0	0	32332	0	0	0	0	0	0	0	42850	0	0	0	0	0
SGYSDNFFFQLLGK	frv2_107353	frv2_107353	yes	yes	7.1644e-06	116.58	2778200	0	0	26075	48732	0	28074	0	0	0	0	39716	45072	73312	75521	0	53144	0	0	0	71599	59981	0	0	0	25926	0	0	0	0	0	0	0	0	77779	0	0	0	108930	58102	0	0	0
LDSLLFQWANSLAQGASLPLPMPLKVDK	frv2_107818	frv2_107818	yes	yes	3.9697e-114	180.45	39381000	255410	541160	815270	2101700	3812700	0	0	0	0	786820	342310	70940	128000	42434	45624	109410	0	0	2004700	275010	0	0	0	0	46335	0	0	419280	0	0	0	0	0	0	0	0	0	311530	92145	0	0	0
SLMQALQK	frv2_107818	frv2_107818	yes	yes	0.00094886	118.74	588240	20998	0	0	0	0	0	0	0	0	20038	0	0	0	0	0	0	0	0	102200	0	0	0	0	0	0	0	0	40298	0	17613	0	0	0	0	0	0	0	0	0	0	0	0
APGILNVGPGVQVLADYPVPSDK	frv2_107924	frv2_107924	yes	yes	4.5466e-39	144.95	10599000	0	0	0	0	0	0	0	23934	80401	0	0	0	0	0	0	0	0	0	0	0	168940	0	0	0	0	100920	57947	0	19524	0	82418	0	0	162870	127100	198700	0	0	0	0	139360	51582
EASSSIVPEQVTQVGTSFK	frv2_107924	frv2_107924	yes	yes	3.3e-05	97.713	7682300	0	82127	0	0	151950	74697	28957	0	88548	23200	35028	23682	32126	0	29666	0	0	49644	93464	102310	104060	36293	19341	126300	144940	118750	57309	0	0	110850	95955	0	0	230730	242220	140910	0	0	0	0	0	0
KPEQLLTVNSLIIPGGESTTMAK	frv2_107924	frv2_107924	yes	yes	0.042281	41.45	2143700	0	0	0	0	0	0	0	0	0	0	0	0	0	0	0	0	0	0	0	0	0	0	0	0	0	0	0	0	0	0	0	0	0	0	0	0	0	0	0	0	0	0
LAEAFNLFPALR	frv2_107924	frv2_107924	yes	yes	1.618e-05	138.89	11543000	43545	74114	86159	240690	307640	62588	5908.1	18047	77102	44654	60516	0	0	0	42051	60205	0	62015	202970	0	122750	0	0	0	149850	0	0	55695	31183	0	76320	0	0	125660	97777	94435	0	0	102070	76523	0	62903
NFFGSQIQSFETELLVPELVSK	frv2_107924	frv2_107924	yes	yes	4.7347e-05	85.224	13420000	0	0	0	0	0	117070	0	0	79170	79908	117670	40299	63979	70864	44301	95029	0	80744	115200	0	191590	0	0	0	218950	32774	47506	54060	0	0	68748	0	0	239220	0	91974	15365	144490	127160	77752	0	37172
QGNILATAFHPELTADTR	frv2_107924	frv2_107924	yes	yes	0.000273	85.006	12639000	0	0	0	0	286770	38417	27750	0	127770	0	25179	72872	44678	62415	93945	64739	0	109000	0	141480	116410	69608	20958	46435	319330	101820	47352	0	0	0	0	112460	0	150470	96467	135490	0	135090	0	204780	0	0
WHSYFLK	frv2_107924	frv2_107924	yes	yes	0.074422	63.306	3472400	6312.4	6858	9407.5	0	55416	10306	0	0	19236	0	0	0	0	21077	8560.6	7876.8	0	16528	30650	40535	21927	0	0	0	42451	0	0	0	0	0	0	0	0	0	0	0	0	42443	14890	26382	0	33895
HAEFAELNTEILGVSVDSVFSHLAWVQTDR	frv2_108091	frv2_108091	yes	yes	2.4429e-85	165.01	14359000	85097	0	0	523390	1011200	0	0	0	0	325770	132670	0	0	0	0	0	0	0	2049100	0	56392	0	0	0	0	0	0	540530	0	0	0	0	0	0	0	0	0	0	0	0	0	0
HAEFAELNTEILGVSVDSVFSHLAWVQTDRK	frv2_108091	frv2_108091	yes	yes	3.0591e-82	153.52	95414000	236500	492920	674840	3055900	8462300	156430	0	0	0	3200000	2007300	68567	67944	0	79300	97459	0	85030	8282900	186580	566840	0	0	0	0	0	0	3065600	57985	0	0	0	0	0	0	0	62317	659940	290360	0	0	0
KSGGLGDLNYPLVSDVTK	frv2_108091	frv2_108091	yes	yes	1.202e-57	193.72	33279000	259840	236130	265790	702460	1074500	77518	36025	47154	111240	148330	176660	176150	182510	271220	112780	113740	0	146850	1010600	98012	198410	74776	0	78208	78429	0	0	295050	217610	221710	157730	114120	0	0	155350	212860	565830	165890	125930	295660	118430	89412
SGGLGDLNYPLVSDVTK	frv2_108091	frv2_108091	yes	yes	4.483e-138	204.71	578260000	5451500	6406500	5599900	12397000	12709000	2155700	948190	1373900	2843600	6447300	3793600	2925000	40755	5122500	3386800	27818	0	33673	19932000	5736500	0	1946400	643280	0	0	0	0	7372900	5778600	4205700	0	0	1781500	114190	104950	0	9086600	208720	63111	0	0	0
SYGVLIPDQGIALR	frv2_108091	frv2_108091	yes	yes	5.437e-48	201.08	2153600000	11570000	14368000	16210000	39301000	39610000	4602900	2672400	3993700	7913500	12899000	9328300	13432000	6852400	13738000	20227000	4580800	56554	4853100	51051000	27486000	13528000	7397400	3312700	7764800	7683800	5714100	3653400	17944000	9069200	8423300	9260700	12730000	2151800	12236000	12637000	11560000	37109000	19482000	22692000	13825000	13083000	8737300
NLVTGIVGNNHLILELVSADLNPK	frv2_108423	frv2_108423	yes	yes	0.00078238	60.133	1916800	0	0	0	0	0	0	0	0	0	116130	95070	34524	0	0	23754	38430	0	0	219810	0	0	0	0	0	0	0	0	119670	0	0	0	0	0	0	0	0	0	87082	0	0	0	0
NKDFVAEFGDQQFQVESSNLQDSDFLNAVVK	frv2_108576	frv2_108576	yes	yes	1.2987e-06	66.633	3433600	121450	0	0	0	0	0	0	0	0	199780	243240	0	91678	0	0	0	0	0	432990	0	0	0	0	0	0	0	0	0	0	0	0	0	0	0	0	0	0	0	0	0	0	0
QFTSTGSAFMIGGR	frv2_108576	frv2_108576	yes	yes	0.0073667	72.523	5497500	92514	99331	154840	250920	403230	23273	14481	0	40353	167980	0	54896	0	90670	0	15035	0	0	375670	118570	43095	38778	45504	0	0	0	17937	149290	52680	0	83989	0	0	0	55217	22669	0	0	0	0	0	0
EGSFFGLEASLEGLEPGYPGGPLLNPLGLAK	frv2_109296	frv2_109296	yes	yes	0.011507	36.319	2160700	0	40077	0	115670	176110	0	0	0	0	65779	34687	0	0	0	0	0	0	0	231320	0	0	0	0	0	0	0	0	77732	0	0	0	0	0	0	0	0	0	102240	0	0	0	0
FAMLGVLGILVTDLLR	frv2_109296	frv2_109296	yes	yes	0.00087097	98.421	120120	0	0	0	0	0	0	0	0	0	0	0	0	0	0	0	0	0	0	0	0	0	0	0	0	0	0	0	0	0	0	0	0	0	0	0	0	0	0	0	0	0	0
QICTATQQR	frv2_109296	frv2_109296	yes	yes	0.060636	56.258	0	0	0	0	0	0	0	0	0	0	0	0	0	0	0	0	0	0	0	0	0	0	0	0	0	0	0	0	0	0	0	0	0	0	0	0	0	0	0	0	0	0	0
ANEISVSAEEEFNIEKLQLVEADKK	frv2_109379	frv2_109379	yes	yes	0.073464	45.423	2673700	0	0	0	0	0	0	0	0	0	0	0	28017	81512	170560	73319	70918	0	150550	0	0	0	0	0	0	124200	0	0	0	0	0	0	0	0	0	0	0	0	124940	0	125740	0	149830
DLIIQSLLR	frv2_109379	frv2_109379	yes	yes	1.6527e-11	183.72	69367000	107900	211220	276930	553860	1340400	426390	86528	103680	486020	81048	211740	194420	238070	332200	313550	281840	16611	383410	189940	492950	540400	278710	132120	259600	1114400	408150	551570	166170	84881	250120	891240	794320	0	1133900	993440	928820	173840	520170	510160	744280	818970	685430
ELLNVSGDPEVYGSLLKDLIIQSLLR	frv2_109379	frv2_109379	yes	yes	0.0063118	47.05	1778800	0	0	43093	0	0	0	0	0	0	49770	132510	0	10787	0	0	52629	0	0	0	0	0	0	0	0	0	0	0	0	0	0	0	0	0	0	0	0	0	0	0	0	0	0
EVDLPLVEDVLESAAQEYAEK	frv2_109379	frv2_109379	yes	yes	5.5474e-205	257.88	62370000	153020	150710	147750	194470	178490	473310	15798	0	555750	64933	252080	175530	345870	541830	421430	456690	0	933740	288060	267330	408970	57443	0	327380	1138200	712900	150450	164280	150670	366730	894200	297220	260560	1767000	1411300	534860	165010	422040	473940	719810	45153	463800
LDVLFR	frv2_109379	frv2_109379	yes	yes	0.0028144	133.99	16886000	30159	56504	46604	204070	225100	65139	25401	27017	100140	0	40116	50100	51996	90918	49550	66233	0	107210	0	90501	108310	141100	33266	42488	175640	131590	151190	44169	31363	82095	169910	237910	0	369660	200120	213100	47394	159020	70318	182450	165020	185210
QIQQMVR	frv2_109379	frv2_109379	yes	yes	0.0020763	114.59	3795100	7982.6	12393	13272	31145	49902	17191	8100.1	13471	29920	5654.9	9930.6	0	17395	0	18942	0	0	25338	12587	17341	23681	41380	30228	0	53076	57573	22371	10133	12845	29959	25236	97239	0	105740	72407	61019	10850	21892	18631	26338	41591	25682
NFFVGLPASTNAAR	frv2_109472	frv2_109472	yes	yes	0.066489	51.643	720540	0	0	0	0	0	0	0	0	0	0	0	33314	18531	0	0	32756	0	0	0	0	75672	0	0	0	0	0	0	0	0	0	0	0	0	0	0	0	0	0	0	0	0	0
NGFVPSPTLINQLLPIVR	frv2_109472	frv2_109472	yes	yes	0.00077835	81.606	3151300	0	60380	49079	146190	447850	35513	0	0	0	0	0	27937	33603	0	34545	38465	0	0	0	100370	60754	0	0	0	40680	0	0	0	0	0	0	0	0	0	0	0	0	0	0	0	0	0
NSWNQWINTITAK	frv2_109472	frv2_109472	yes	yes	0.045018	81.904	3908900	0	0	0	0	0	0	0	0	0	0	0	0	0	0	0	0	0	0	0	0	0	0	0	0	0	0	0	0	0	0	0	0	0	0	0	0	0	395750	114900	72427	0	0
EKGVEEIEEALHLFENELK	frv2_109914	frv2_109914	yes	yes	3.7769e-06	105.5	1758500	0	0	0	0	0	0	0	0	0	0	47629	17378	30537	59792	40432	33198	0	0	0	0	0	0	0	0	0	0	0	0	0	0	106580	0	0	0	0	0	31141	99320	0	142610	0	0
FIDDKIINAAR	frv2_109914	frv2_109914	yes	yes	0.011732	101.39	3231900	0	0	0	0	0	0	0	0	0	31045	57329	56981	60916	85687	59781	62653	0	52604	0	0	0	0	0	0	50400	0	0	0	0	70103	87520	57300	0	123740	29619	0	19088	114180	111320	137580	0	90753
GVEEIEEALHLFENELK	frv2_109914	frv2_109914	yes	yes	1.1197e-39	173.28	4340600	0	0	0	0	0	0	0	0	0	20534	45582	28467	39675	28596	140470	23663	0	25494	0	0	73228	0	0	0	117110	0	0	0	40881	0	206800	0	0	431860	0	47611	22862	0	232180	97411	0	49026
GVEYKYEVENLQNKSEFLLK	frv2_109914	frv2_109914	yes	yes	0.036532	60.669	3110500	0	0	0	0	0	0	0	0	0	0	88718	98533	132490	134460	95398	122220	0	111020	0	0	0	0	0	0	0	0	0	0	0	0	0	0	0	0	0	0	0	0	0	87135	0	95132
LLGMVESPFVSR	frv2_109914	frv2_109914	yes	yes	1.0283e-08	166.11	29832000	0	0	35038	116740	161070	62589	0	0	95230	74449	190850	190800	182840	285790	228330	216170	8275.3	283980	290240	290260	206280	155370	34675	94788	344010	106180	74877	134340	89045	345340	474870	772590	0	732040	770470	879700	249290	777090	655770	708970	686500	761520
LYNWSQDFNNHPIVK	frv2_109914	frv2_109914	yes	yes	4.8379e-106	238.88	40006000	0	0	0	0	0	48914	0	0	45425	197200	290270	293690	289690	487700	356030	395400	0	388260	0	215470	369270	114530	16970	51266	527930	199020	98361	179890	136450	303560	979140	1192300	0	1385600	941860	716370	325470	1039300	797390	966680	956330	686230
ATSDHAFNATIWDVLVDPGYQGQGLGK	frv2_11030	frv2_11030	yes	yes	2.7064e-11	92.886	7947600	131270	0	96874	199640	449550	0	0	0	0	168690	159650	0	68117	106170	0	0	0	0	687730	0	0	0	0	99579	0	0	0	0	72107	0	0	0	0	0	0	0	181110	0	0	0	0	0
DAVFLSGGPEYK	frv2_110547	frv2_110547	yes	yes	7.8638e-06	130.56	1759100	0	0	0	0	0	0	0	0	0	0	0	0	0	0	0	0	0	0	0	0	0	0	0	0	0	0	0	0	0	0	0	0	0	140650	102160	167320	0	46876	0	63665	0	69139
DAVFLSGGPEYKVPLGR	frv2_110547	frv2_110547	yes	yes	1.8076e-32	158.14	16877000	0	0	0	0	0	0	0	0	0	25186	47981	71923	112430	0	0	157720	0	882960	0	0	0	0	0	0	0	0	0	0	0	46852	146050	378750	0	346010	678160	1017200	0	491030	849930	742370	0	1603200
DIGQAAGLLR	frv2_110547	frv2_110547	yes	yes	2.5554e-05	164.33	7081300	0	0	0	0	0	0	0	0	0	0	19466	29346	44982	39899	31216	52975	0	105890	0	0	0	0	0	0	0	0	0	27648	0	0	133980	183600	0	269770	268560	350540	44318	229540	166990	171330	347720	360100
IFDKDIGQAAGLLR	frv2_110547	frv2_110547	yes	yes	5.8662e-13	147.39	2167300	0	0	0	0	0	0	0	0	0	0	0	0	0	0	0	45094	0	236270	0	0	0	0	0	0	0	0	0	0	0	84793	0	0	0	43985	0	456600	0	0	0	550130	0	0
VKAGDSTPEELANATQVQGSYLPIVR	frv2_110794	frv2_110794	yes	yes	0.026468	41.06	809830	0	0	0	0	0	0	0	0	0	0	55443	46220	0	120800	0	0	0	39185	0	0	0	0	0	0	0	0	0	0	0	0	0	0	0	0	0	0	0	0	0	0	0	0
NILQQLQNMNLIELDTK	frv2_110796	frv2_110796	yes	yes	1.2192e-170	253.36	40694000	58945	106600	127280	325860	834310	336370	0	0	536650	0	0	0	121570	187950	145450	225960	0	464050	0	281800	150280	0	0	0	614420	282260	116470	0	0	0	163550	0	0	771930	0	441110	0	541050	144340	232640	0	0
NPVILQSEDLANYILETAVYPR	frv2_110858	frv2_110858	yes	yes	7.7461e-44	153.25	10516000	0	0	0	0	0	0	0	0	27723	0	25576	8411.8	43466	0	23048	26022	0	103020	86773	78477	234400	0	0	0	176280	43663	0	194950	54657	86324	138330	133100	0	600270	210600	298550	48789	655880	257260	196920	0	137020
NPVILQSEDLANYILETAVYPREPEILK	frv2_110858	frv2_110858	yes	yes	3.441e-10	84.156	3255900	0	0	0	0	0	0	0	0	0	0	142770	0	79641	0	32140	78102	0	59905	0	0	0	0	0	0	0	0	0	0	0	0	61514	0	0	104450	0	0	0	207300	228550	88632	0	0
DLVDVENFLASHK	frv2_110900	frv2_110900	yes	yes	3.0047e-65	217.46	11753000	115790	92938	78286	223060	311070	0	0	0	0	61259	62390	41657	0	0	0	0	0	0	567940	264030	96465	0	0	0	0	44697	0	236830	91478	0	39798	0	0	0	0	0	278590	284320	89782	176060	0	53561
FPGSQPILTTQMK	frv2_110900	frv2_110900	yes	yes	9.6759e-05	109.95	1104600	0	0	0	0	0	0	0	0	0	0	0	0	0	0	0	0	0	0	0	0	0	0	0	0	0	0	0	0	0	0	0	0	0	0	0	0	0	0	0	0	0	0
IDGLALR	frv2_110900	frv2_110900	yes	yes	0.013617	94.262	737190	14341	33810	20177	0	0	0	0	0	0	0	0	0	0	0	0	0	0	0	46120	9134	0	0	0	0	0	0	0	23991	0	0	0	0	0	0	0	0	15491	0	0	0	0	0
IHAVYAAMK	frv2_110900	frv2_110900	yes	yes	0.0028692	99.375	3610300	22375	27951	31753	83375	105540	5713	0	0	0	57116	36607	18714	15588	20046	12970	11077	0	0	148520	67288	29458	11666	5217.5	0	16999	0	3736.3	6818.6	22857	0	26010	46727	0	0	0	0	59371	67269	22693	9573.3	8185.9	0
LPLSGSVFLSLNDLTKPHLEK	frv2_110900	frv2_110900	yes	yes	0.00017281	81.643	13499000	84136	196260	144940	495780	741740	0	0	0	0	125970	101230	0	43125	0	24066	16195	0	0	930140	385030	181010	0	0	0	0	0	0	345140	80078	0	0	0	0	0	0	0	112010	217100	0	0	0	0
LRDYSIAIIR	frv2_110900	frv2_110900	yes	yes	0.0051772	132.25	10954000	96954	83748	99794	249900	450200	16294	3848.7	8852.3	17756	161580	93238	66730	56051	92926	34859	24106	0	19599	308840	137910	60003	18572	8143.8	19454	37050	18712	0	82024	68778	49814	57246	0	0	45443	0	24692	226520	198810	95934	55427	0	50842
LSDLTHADFYEVK	frv2_110900	frv2_110900	yes	yes	3.6287e-22	183.06	8300600	92218	139580	81001	278400	263290	0	0	0	0	113640	68125	71329	72588	64284	4998.1	0	0	56187	420840	113550	0	0	0	0	0	0	0	177740	95921	117460	0	0	0	51820	0	22679	156540	137390	75072	0	0	0
LSLGVAPAYK	frv2_110900	frv2_110900	yes	yes	0.022566	68.657	1936600	22402	49540	41993	93802	75512	0	0	0	0	28373	29286	12861	7945.7	0	4811.9	2775.8	0	0	116470	50394	0	0	0	0	0	0	0	51192	17996	21359	0	0	0	0	0	0	55915	17657	0	0	0	0
LSVGYTLDQIPNDITQK	frv2_110900	frv2_110900	yes	yes	4.4941e-112	224.36	26672000	596480	727670	567760	1072900	1461600	86287	27297	32723	57568	527310	480250	260970	205710	382590	136630	128970	0	0	1857600	766700	428990	103590	51630	0	210220	86445	0	657890	296800	78438	260100	226100	0	0	0	0	0	0	0	0	0	0
MIALQDFMVDELKE	frv2_110900	frv2_110900	yes	yes	1.9344e-13	148.7	21122000	257270	195870	130160	422930	596250	62804	0	0	58367	288560	171460	111600	104690	102500	49297	61311	0	30625	724230	305730	148630	0	0	0	115150	0	0	235810	128260	0	95814	59127	0	132370	0	0	274150	342870	145390	43618	0	0
QFKDLVDVENFLASHK	frv2_110900	frv2_110900	yes	yes	0.00065649	86.548	3060600	0	30013	49707	0	259570	0	0	0	0	79252	94989	43441	40952	61541	32527	23875	0	0	0	0	0	0	0	0	0	0	0	0	0	0	0	0	0	0	0	0	0	93441	0	0	0	0
RLSLGVAPAYK	frv2_110900	frv2_110900	yes	yes	0.024	84.31	7545700	72698	185770	108360	799440	458420	12368	3715.1	0	11838	54729	41585	27069	22513	39983	0	17128	0	0	241460	99046	46094	7486.1	0	0	0	0	0	113530	0	49856	17723	31796	0	0	0	0	0	154400	0	0	13172	0
SLLGWKEYELEVMR	frv2_110900	frv2_110900	yes	yes	4.0981e-08	125.36	1152700	0	0	0	0	0	0	0	0	0	0	0	0	0	0	0	0	0	0	0	0	0	0	0	0	0	0	0	0	0	0	0	0	0	0	0	0	0	0	0	0	0	0
STGEVMGIDPLYNIAFAK	frv2_110900	frv2_110900	yes	yes	7.2674e-71	203.92	43145000	373270	504360	498880	1278300	1455500	0	15841	21284	0	808900	531680	245030	225860	242120	153340	118680	0	0	2063900	0	0	34802	0	0	0	0	0	669300	274890	0	0	0	0	0	119470	0	534430	0	0	0	103620	0
TPASFEPSIDYVVTK	frv2_110900	frv2_110900	yes	yes	9.8855e-49	201.3	33905000	357520	426110	330330	843490	987570	78140	24353	0	56789	295460	249450	149320	142060	0	84172	0	0	0	1313600	501510	194950	161370	72989	68573	157400	0	0	411360	248810	227800	119520	0	0	202860	157070	83325	650990	624920	187510	0	0	86149
VILINSNPATIMTDPDMADR	frv2_110900	frv2_110900	yes	yes	1.2277e-110	214.42	52504000	575220	432580	400220	679370	1076700	0	0	0	166850	377500	268580	125370	139650	156130	105360	73705	0	92305	1893800	790730	394310	0	0	0	326870	0	0	774100	342910	192280	0	0	0	0	0	0	817610	695990	347260	354790	243080	123420
VLILGGGPNR	frv2_110900	frv2_110900	yes	yes	0.0039643	94.309	9556600	75148	108650	96661	292880	213340	12628	0	0	0	116230	84028	40235	29145	46803	21062	12223	0	10474	358020	147760	79669	33832	11153	17959	37986	0	0	175200	61679	96778	46461	0	0	74692	0	0	155180	0	67022	52722	0	0
VPIVTTVNGALATAEAIK	frv2_110900	frv2_110900	yes	yes	0.012541	84.94	7302900	52590	108600	67211	195010	251310	0	0	0	0	61671	54997	0	0	0	0	0	0	0	271490	135680	0	0	0	0	0	0	0	120070	0	0	0	0	0	0	0	0	98553	137860	46775	0	0	0
YASLVMSGK	frv2_110900	frv2_110900	yes	yes	0.0023015	102.06	3362000	26355	45558	40502	109700	107860	4157.1	0	0	0	57552	33761	19152	17964	19183	10336	0	0	0	170660	56975	30908	8347.5	0	0	0	0	0	66508	26708	35575	19303	27846	0	28354	14777	0	56210	21637	0	0	0	0
YGVELIGAK	frv2_110900	frv2_110900	yes	yes	0.037086	64.654	565150	0	0	0	40080	0	0	0	0	0	20238	17558	0	0	0	0	0	0	0	0	0	0	0	0	0	0	0	0	0	0	0	0	0	0	0	0	0	0	0	0	0	0	0
QTIATIGENIK	frv2_110906	frv2_110906	yes	yes	0.0099411	76.326	28674000	62466	112260	75965	0	0	0	0	0	0	0	39000	0	0	0	0	0	0	0	0	0	0	0	4508.1	0	0	0	0	0	0	0	0	0	0	0	0	0	0	0	0	0	0	0
ALGSMPGVYR	frv2_110910	frv2_110910	yes	yes	0.0025267	101.65	3934800	9288.9	19238	22260	55530	0	21158	6040.6	0	22019	5645.2	9579.2	0	0	0	5399.1	0	0	8164.7	30788	51778	47898	35787	13996	23256	59480	28751	8068.9	0	9043.7	25032	44433	81580	0	80694	0	30238	18375	51360	19121	20065	45207	0
DGIDEMSSTSSSVLLSVLK	frv2_110910	frv2_110910	yes	yes	5.6972e-06	103.41	3052400	0	0	0	0	0	52784	0	0	55516	0	0	0	28846	0	24610	21597	0	0	0	169740	73783	0	0	0	104730	0	0	0	0	0	122430	63282	0	0	0	0	0	0	0	0	0	0
ELANLTLIMGNR	frv2_110910	frv2_110910	yes	yes	0.0011277	96.756	5174300	0	0	0	34440	0	0	0	17565	68025	0	0	0	15448	0	0	0	0	13870	128830	158790	0	0	10928	0	0	50545	36879	0	0	19120	142440	53000	0	103040	86927	65448	0	0	58935	62931	0	0
GVFINPAFIEPFGLTLIEAAAYGLPMVATK	frv2_110910	frv2_110910	yes	yes	0.00024085	53.679	4879200	0	41053	68508	246720	229720	0	0	0	0	0	28597	0	0	0	0	0	0	0	157190	87317	16969	0	0	0	0	0	0	0	0	0	0	0	0	0	0	0	0	60144	0	0	0	0
LIDKYDLYGQVAYPK	frv2_110910	frv2_110910	yes	yes	1.5662e-08	122.63	6722500	0	0	0	0	138470	38065	12410	0	70432	0	29041	0	28162	0	0	43066	0	0	75313	137580	57195	61900	0	39583	101710	49480	0	0	0	0	0	158070	0	153470	118180	95911	0	104450	0	87534	0	55333
LYNGFDPVLER	frv2_110910	frv2_110910	yes	yes	0.00079559	107.97	4671800	0	0	0	0	0	49211	13881	19148	71752	0	0	0	0	0	0	0	0	0	0	0	0	41227	26087	40879	112990	105810	0	0	0	0	50570	93931	0	149610	131360	69490	0	0	0	82857	0	0
RIEAEELALDGTEIVITSTR	frv2_110910	frv2_110910	yes	yes	0.00053848	77.505	5427000	0	0	0	0	0	67005	0	0	101390	0	0	0	0	0	0	0	0	0	0	0	0	0	0	0	149770	0	0	0	0	0	106260	0	0	253090	0	92281	0	0	123770	0	0	92538
YFVEEVIGFDETDLYR	frv2_110910	frv2_110910	yes	yes	0.00051655	91.355	7095500	0	56027	0	94621	0	117070	0	0	106100	0	58155	26360	61851	68801	0	85170	0	78893	0	121710	0	0	0	0	181340	82775	0	0	0	0	150200	0	0	0	0	0	71983	0	103410	100730	0	94201
YIPKEELWPYIPEFVDGAIGHIIQMSK	frv2_110910	frv2_110910	yes	yes	0.0094737	45.042	662270	0	0	0	0	0	0	0	0	0	0	0	0	0	0	0	0	0	0	125220	0	0	0	0	0	0	0	0	0	0	0	0	0	0	0	0	0	0	0	0	0	0	0
LTELLQNVYASYPQYR	frv2_110924	frv2_110924	yes	yes	0.00037136	94.922	689740	0	0	0	0	332600	0	0	0	0	0	0	0	0	0	0	0	0	0	0	0	0	0	0	0	0	0	0	0	0	0	0	0	0	0	0	0	0	0	0	0	0	0
TANLGSWQVISPVETIGYVEVVDELLAVQNK	frv2_110924	frv2_110924	yes	yes	0.072519	25.207	1405300	22832	17817	0	45340	130500	0	0	0	0	75633	53499	0	0	0	0	0	0	0	191480	0	32326	0	0	0	0	0	0	39872	0	0	0	0	0	0	0	0	0	62569	0	0	0	0
AQISNAQPDDLIDFYHLK	frv2_110926	frv2_110926	yes	yes	8.8692e-06	108.75	33685000	0	49988	57310	0	736920	196230	35183	71133	206660	30754	69891	50934	46206	80184	105230	108380	0	112520	337320	441050	371140	106370	105080	241820	383600	308560	71507	68492	58207	158900	496540	611950	0	921300	555970	392510	0	290860	370180	661580	582420	402140
AVQQVNSTTVSSR	frv2_110926	frv2_110926	yes	yes	0.0052798	75.102	340600	0	0	3977.4	0	0	0	0	0	0	0	0	0	0	0	0	0	0	0	0	12899	12169	6958.1	7644.4	0	5656.3	6546.2	0	0	0	11182	10163	18105	15917	24436	0	8316.3	0	9433.1	0	13633	0	6734.9
EIMVDMVMDVLR	frv2_110926	frv2_110926	yes	yes	2.5797e-05	99.5	853040	0	0	0	0	0	0	0	0	0	0	0	0	0	0	0	0	0	0	101870	0	77792	0	0	0	56718	0	0	0	0	0	27488	0	0	143090	0	0	0	0	0	0	0	0
INESEIVEPLIPSILSNLEHR	frv2_110926	frv2_110926	yes	yes	6.9647e-09	102.89	4485200	0	0	0	0	0	0	0	0	34864	0	0	0	28788	0	0	0	0	23798	147300	144000	127850	0	0	0	152650	0	0	0	0	0	0	0	0	153760	0	37915	0	0	0	210270	28073	0
LVERPQNYTLAPESSK	frv2_110926	frv2_110926	yes	yes	1.4458e-14	132.15	4782200	8516.5	0	0	0	0	20527	0	5161.4	15667	0	0	0	14530	0	12856	0	0	8368.2	0	33233	110110	45893	27407	31131	76542	71217	0	22811	0	67719	120500	205820	0	374450	95597	90856	20277	45502	105160	164440	108790	42379
ALSSSSSSSSSSPSSSTPAPAPAPAPAPVESQPK	frv2_110946	frv2_110946	yes	yes	0.002126	56.048	2426300	47247	49932	34181	106210	0	0	0	0	0	44290	46533	0	25237	32316	0	14189	0	0	93745	43295	0	0	8151.1	0	0	0	0	0	0	0	41712	0	0	0	0	0	0	79380	0	0	0	0
TTASGVELGTVVPFTTMQNAVSR	frv2_110946	frv2_110946	yes	yes	0.00040059	71.042	4659700	95304	80943	79934	143310	0	0	0	0	0	0	0	0	0	0	0	0	0	0	345640	128260	0	0	0	0	0	0	0	183750	59940	0	0	0	0	0	0	0	100340	0	0	0	0	0
VGYTFTTDALDALYK	frv2_110946	frv2_110946	yes	yes	2.1293e-09	124.16	8810500	0	0	0	384870	547900	0	0	0	0	167180	144470	49910	39848	0	0	0	0	0	388500	0	96257	0	0	0	0	0	0	227170	0	0	0	0	0	0	0	0	179420	170290	0	0	0	104000
VIYGSDLALFLQTLSQIIEDPK	frv2_110946	frv2_110946	yes	yes	4.5731e-09	102.16	3078200	0	55800	70876	155890	104480	0	0	0	0	0	8843.8	0	0	0	0	0	0	0	286650	59184	19961	0	0	0	0	0	0	93851	0	0	0	0	0	0	0	0	0	0	0	0	0	0
EVEMDDWLFEFAQLFR	frv2_111004	frv2_111004	yes	yes	5.7266e-06	118.2	286200	0	0	0	0	0	0	0	0	0	0	0	0	0	0	0	0	0	0	0	0	22206	0	0	0	0	0	0	0	0	0	0	0	0	0	0	0	0	0	0	0	0	0
KIDLTSWDPTETLELFNSAEEK	frv2_111004	frv2_111004	yes	yes	4.1078e-05	85.855	3047800	0	0	0	0	0	0	0	0	0	0	0	0	0	0	0	0	0	102510	238810	0	0	0	0	0	226930	75759	0	0	30549	0	0	0	0	0	0	0	0	0	0	0	0	0
LAESFVDSYLLKEPESDKSDSISVLR	frv2_111004	frv2_111004	yes	yes	5.3983e-47	145.67	23299000	0	0	0	0	578200	288800	23688	0	132660	0	446580	137060	123840	135500	245520	164530	0	272140	0	0	215840	0	0	98510	572310	355840	0	0	0	0	0	0	0	326220	0	0	0	0	211250	651240	219180	259820
QEAQQDLHSRPSPAALGASAVR	frv2_111004	frv2_111004	yes	yes	0.00047707	71.872	2961500	0	0	12963	30815	88284	14867	0	0	9778.9	0	14869	0	18498	28848	13215	22680	0	22692	0	0	0	0	0	0	62595	0	0	0	0	0	45250	58786	0	115530	110310	29432	0	0	23665	0	62073	26054
QQNVALKPLSNGPAVQPNSK	frv2_111004	frv2_111004	yes	yes	0.00017493	86.016	4849600	0	0	20299	63920	132110	18636	9935.2	0	23670	20667	25884	25079	24212	35114	24151	32049	0	28560	48931	42384	34183	14142	0	18141	50308	54153	32690	0	0	29947	49367	0	0	61038	97882	53499	0	84716	42702	71331	51076	46721
EEVINWGLSGPMLR	frv2_111006	frv2_111006	yes	yes	0.0019283	84.62	985070	0	0	0	0	0	0	0	0	0	0	0	0	0	0	0	0	0	0	0	0	0	0	0	0	0	0	0	0	0	0	0	0	0	0	0	0	0	0	0	0	0	0
FLIIDSMLACR	frv2_111031	frv2_111031	yes	yes	0.00040051	120.45	2482900	0	0	0	0	0	0	0	0	42544	0	0	30991	0	0	0	0	0	25956	0	0	0	0	0	0	59216	0	0	0	0	0	0	0	0	0	0	96252	116680	227420	87652	145230	0	87075
ALVAASHPEFSSMR	frv2_111040	frv2_111040	yes	yes	0.0025785	82.202	5157500	0	0	16309	38792	81468	19645	7624.1	9230.2	22055	11225	22782	17921	14915	45607	18839	25866	0	12900	31558	60871	49222	33969	10419	30296	72258	45317	0	0	17043	63206	102620	148420	0	112080	127320	31915	22721	0	29108	80006	0	0
QQDALEFFLHFLDQVER	frv2_111040	frv2_111040	yes	yes	0.068641	46.873	104640	0	0	0	0	0	0	0	0	0	0	0	0	0	0	0	0	0	0	0	0	0	0	0	0	0	0	0	0	0	0	0	0	0	0	0	0	0	0	0	0	0	0
TGNPVYLHVK	frv2_111040	frv2_111040	yes	yes	0.024583	67.334	715270	0	4822	4911.9	0	0	0	0	0	0	1803.1	0	4743.4	0	0	0	0	0	0	13718	8148.1	9537.4	0	0	0	7476.7	7155.3	0	0	0	0	0	30908	0	26954	18722	9448.9	0	11898	5626.7	7559.6	0	0
ALENTSVPIGDLPEDKLSTGQGLMQIDK	frv2_111044	frv2_111044	yes	yes	0.0002909	57.692	12866000	0	0	0	0	0	121780	61359	39605	126920	0	121050	69315	84856	0	81331	64832	0	98779	0	112470	0	0	0	0	0	213070	67707	0	0	0	269810	253550	0	463170	299360	0	0	0	0	133510	0	238140
VYSSGDAYPSSSNLPK	frv2_111044	frv2_111044	yes	yes	0.044155	66.826	0	0	0	0	0	0	0	0	0	0	0	0	0	0	0	0	0	0	0	0	0	0	0	0	0	0	0	0	0	0	0	0	0	0	0	0	0	0	0	0	0	0	0
AIDLLYDAALVSSGFTPDNPAQLGGK	frv2_111051	frv2_111051	yes	yes	1.5271e-07	83.871	5018600	0	0	0	0	432980	64480	0	0	0	0	132570	0	0	120770	0	0	0	0	0	0	0	0	0	87031	134890	66941	0	0	0	0	111730	0	0	159340	0	115090	0	0	0	0	30368	54663
ELISNASDALDKLR	frv2_111051	frv2_111051	yes	yes	4.9658e-28	182.37	82827000	180690	244810	327760	800010	2168700	242610	100030	107390	192130	0	365140	800420	501260	827880	483500	513000	0	395550	271860	947990	849230	0	189530	423150	1150700	135750	0	553420	0	725840	1122300	1064300	0	0	0	0	585550	1717900	948420	2486000	0	1445700
LAEKDLEVLFLVDPIDEVAIQNIK	frv2_111051	frv2_111051	yes	yes	0.0013354	59.996	1538400	0	0	0	0	0	0	0	0	0	72098	91443	34473	66056	77128	31689	55820	0	22071	0	0	0	0	0	0	0	0	0	0	0	0	0	0	0	0	0	0	0	0	0	0	0	0
LMDLIVNSLYSNK	frv2_111051	frv2_111051	yes	yes	0.018975	91.307	5915400	0	0	86228	122400	265180	48582	0	0	38199	0	0	41167	0	71887	27348	0	10101	25978	0	107590	98350	58780	23934	43802	145310	78960	0	66350	0	37277	149060	144490	0	0	133470	81344	0	0	56377	0	0	0
IASDDEAFSGLAFK	frv2_111059	frv2_111059	yes	yes	0.0013954	88.706	5731000	121580	293630	180050	459700	431500	0	0	0	0	142310	78428	74288	45679	57323	40597	26125	0	30349	544170	133670	65789	0	0	0	0	0	0	157020	0	140740	0	0	0	0	0	0	0	0	0	0	0	0
GEEAYSLGLVDALVSR	frv2_111075	frv2_111075	yes	yes	4.2865e-06	111.11	2566900	0	0	0	0	0	29673	0	0	48039	0	0	0	0	0	0	0	0	0	0	98512	0	0	0	0	124030	0	65885	0	0	0	65865	76123	0	148160	122350	93027	0	0	0	84826	105270	0
QLDELGDTSTLAEPQVVNQLIELADQ	frv2_111079	frv2_111079	yes	yes	0.0070147	45.072	2888000	39813	0	25689	53356	0	24262	0	0	15419	66792	66315	6475.1	49478	45956	10427	0	0	31187	131130	0	0	21222	0	41443	63720	53269	0	0	19858	68086	0	33607	0	91895	0	0	0	0	0	0	0	32746
SIEDPAGFWSEIASDFYWK	frv2_111079	frv2_111079	yes	yes	4.3668e-37	148.52	5953000	26521	41457	44694	94920	235420	15834	0	0	0	89558	123340	0	18287	0	0	21655	0	10376	322460	109040	82700	0	0	0	43474	0	0	105860	0	0	0	0	0	62469	0	0	0	190900	32562	0	0	0
VLGSVGEPINPSAWR	frv2_111079	frv2_111079	yes	yes	0.0010382	88.108	9935000	86183	95458	108400	206250	310850	45845	0	0	0	154990	84337	68455	44586	102930	46141	37554	0	39267	331470	209360	0	0	0	0	94657	0	0	123600	0	129780	107560	0	0	231020	196950	89029	0	216650	131110	0	115630	108170
VSIFYTAPTLVR	frv2_111079	frv2_111079	yes	yes	0.00034651	107.34	6882800	41532	91567	0	223460	0	0	0	0	33449	68882	80609	36823	30370	44900	28251	29241	0	31429	193130	151190	101500	19839	0	0	49881	0	0	107090	32420	42499	53920	0	0	69109	0	0	78577	168390	0	0	0	50447
VVITSNAVK	frv2_111079	frv2_111079	yes	yes	0.071442	55.461	75065	0	0	0	3727.5	0	0	0	0	0	0	0	0	0	0	0	0	0	0	10528	3108.1	0	0	0	0	0	0	0	0	0	0	0	0	0	0	4798.7	0	0	0	0	0	0	0
WFYNVVGDSR	frv2_111079	frv2_111079	yes	yes	0.024765	94.465	2267800	0	0	26432	96223	0	0	0	0	50615	38081	30472	0	12799	45445	23933	20989	0	22630	0	0	0	0	0	0	61244	0	0	0	0	49037	0	0	0	95622	0	0	0	134590	76630	0	0	0
KTAEDLDGFLNMIR	frv2_111103	frv2_111103	yes	yes	0.012538	81.789	19811000	31009	82611	114890	195400	295350	134120	23341	0	45994	42126	0	94645	71697	145270	58478	82679	0	71659	182110	353870	691090	0	87166	472900	250560	253150	358310	93899	0	0	733940	0	0	0	390250	106240	98299	173620	0	340290	0	385010
LLLKLANGK	frv2_111103	frv2_111103	yes	yes	0.0091113	107.9	494470	0	0	0	0	0	0	0	0	0	0	0	0	0	0	0	0	0	0	0	0	0	0	0	0	47260	27606	0	0	0	0	0	0	0	0	0	0	0	0	0	0	0	0
AIVLTGK	frv2_111105	frv2_111105	yes	yes	0.076656	62.715	302400	0	0	0	0	0	0	0	0	0	0	20748	0	0	0	0	0	0	0	0	0	0	0	0	0	0	0	0	30130	0	0	0	0	0	0	0	0	0	0	0	0	0	0
AQLGLPELTLGIIPGFGGTQR	frv2_111105	frv2_111105	yes	yes	0.028868	47.472	916430	0	0	0	0	0	0	0	0	0	0	0	0	0	0	25403	15125	0	29659	0	0	0	0	0	0	48773	0	0	0	0	0	0	0	0	0	0	69253	0	0	0	0	0	0
LGLIDAIVSSEELLK	frv2_111105	frv2_111105	yes	yes	5.2623e-23	174.24	11339000	26638	0	0	0	247360	66649	0	0	117660	26356	0	18470	25287	33668	22281	31425	0	71486	101050	0	0	0	5856.6	0	173030	149350	0	51186	28772	0	60364	0	0	201170	0	156710	49284	247970	159740	183840	21058	170460
TAEVSLVEK	frv2_111109	frv2_111109	yes	yes	0.0040988	93.556	1226300	0	0	0	0	0	0	0	0	0	0	0	0	0	0	0	0	0	0	0	0	0	0	0	0	0	0	0	8218.1	0	0	0	0	0	0	7983.9	0	38472	42017	18682	0	0	0
IENLAGMIPFFDFSVVEK	frv2_111119	frv2_111119	yes	yes	0.00038539	87.668	3587300	0	0	0	0	117970	0	0	0	21478	0	0	0	0	0	0	0	0	20344	117190	43098	86108	0	0	0	57809	0	27233	0	0	0	0	0	0	100900	0	55529	0	155980	0	0	0	0
PAVSVASATPAPGK	frv2_111119	frv2_111119	yes	yes	0.052598	53.869	356620	0	0	0	0	0	4181.1	0	0	0	0	0	0	0	0	0	0	0	0	0	0	0	7667.8	6758.4	0	6895.8	16596	5658	0	0	0	0	0	15248	22174	34461	10989	0	0	0	0	32282	0
TSLEADGLRDHLASFAEQLNK	frv2_111119	frv2_111119	yes	yes	0.0012284	70.094	3445600	0	0	0	0	0	0	0	0	0	24513	45051	0	0	59210	45044	55408	0	89414	0	0	54623	0	0	0	0	0	0	0	0	0	0	0	0	0	0	0	0	206980	0	0	0	0
AGALPTFVLLDR	frv2_111127	frv2_111127	yes	yes	0.00025625	108.72	9002700	29230	0	0	0	74941	57564	13656	33221	142420	0	0	14433	25215	0	23289	25415	0	107390	0	85731	48241	40075	28918	47128	107100	97503	92870	0	0	0	104590	0	0	107180	165000	214680	42647	143670	126870	161150	143440	148710
AGASAVLVADDIEEKLITMDTPEEDGSSAK	frv2_111127	frv2_111127	yes	yes	0.040981	42.738	2436700	0	0	0	0	0	0	0	0	0	0	0	0	0	0	0	0	0	0	0	0	198840	0	0	0	83084	0	0	0	0	0	0	0	0	56236	0	0	0	140330	0	0	0	0
GDVTILPTLVVNSR	frv2_111127	frv2_111127	yes	yes	0.0043057	77.633	9794800	25127	32265	0	0	0	56576	39963	69160	145330	0	0	19338	45306	76456	50659	39760	0	136040	0	0	52729	85490	56298	77699	221770	215720	110840	0	0	0	0	273340	0	164450	182500	275430	0	86654	146890	158270	124000	132810
GTYDSAIGNFGIPQYGGSMAGNVVFPK	frv2_111127	frv2_111127	yes	yes	0.017584	41.475	5810100	0	0	0	0	0	54480	0	0	329720	0	0	0	0	0	0	0	0	0	0	0	0	0	0	0	0	147100	116260	0	0	0	0	0	0	0	0	109160	0	0	0	0	0	0
KVSGPVVVADGMNGAAMYELVR	frv2_111135	frv2_111135	yes	yes	3.3954e-13	119.94	146080000	0	0	0	0	3059100	998610	492250	445790	1346100	0	391550	523690	683170	1295800	722680	1039200	11324	1367200	0	742020	902610	379940	112340	1002200	2774900	2261500	754520	0	0	107350	1407000	1164000	488290	2480200	2300100	1963400	0	1218000	1112400	2277600	1526500	2057800
LEGDSATIQVYEETAGLTVNDPVLR	frv2_111135	frv2_111135	yes	yes	5.2862e-87	171.42	63778000	53942	68841	0	0	0	594770	0	0	1126400	0	0	0	65547	61005	45121	73315	0	403590	0	226250	319370	122430	0	454320	1441700	2080700	914020	0	60960	0	477130	922460	259450	2400600	742590	1269500	0	606560	410010	983860	0	872500
VGHDNLIGEIIR	frv2_111135	frv2_111135	yes	yes	7.031e-09	154.1	75105000	39315	45228	0	210660	357250	178610	80051	98060	235630	18989	71315	50705	67520	193280	99654	230850	0	331140	0	521060	598790	498060	145210	429740	1228700	1453700	639750	229090	120500	268740	700890	1902300	0	2471200	2046000	1027300	74015	253150	119410	471950	2418400	874510
VGHDNLIGEIIRLEGDSATIQVYEETAGLTVNDPVLR	frv2_111135	frv2_111135	yes	yes	4.8438e-27	97.118	20701000	0	0	95858	0	1812000	0	0	0	0	0	591840	0	0	0	0	0	0	0	0	0	147490	0	0	0	0	0	0	0	0	0	0	0	0	0	0	0	0	409500	76359	0	0	0
VSGPVVVADGMNGAAMYELVR	frv2_111135	frv2_111135	yes	yes	1.1831e-125	217.73	70283000	0	86958	0	175010	511140	445300	87603	326590	830630	37301	0	81312	104930	115660	170990	207130	0	313980	0	387390	413150	326220	117480	352190	1058900	1301800	534380	0	56643	78716	562260	1240000	236680	1415800	1064800	976700	110240	333930	295430	892830	1817400	675560
GEGFYYDAHYGDLGLNDDHFK	frv2_111169	frv2_111169	yes	yes	7.2844e-09	102.5	5485800	0	0	0	128190	205420	80267	0	0	65846	0	0	0	0	0	30716	23412	0	36934	0	0	0	0	0	0	0	0	0	0	0	0	0	0	0	0	0	0	0	0	0	0	0	0
GPHIPNTSFVK	frv2_111169	frv2_111169	yes	yes	0.044477	57.532	417510	0	0	0	0	0	0	0	0	0	0	0	0	0	0	0	0	0	0	0	17392	0	0	0	0	9879.9	0	0	0	0	0	0	0	0	26823	38826	9868.9	0	0	0	0	0	11698
QELILHHEWSPGSWFFLPHGAR	frv2_111169	frv2_111169	yes	yes	0.073582	32.627	1480400	0	0	0	0	0	0	0	25742	25583	0	0	0	0	0	0	0	0	0	0	0	0	122480	40114	55462	0	92120	0	0	0	0	0	281470	0	0	112730	0	0	0	0	0	100510	0
TVFGTKPAPSVDSYSSR	frv2_111173	frv2_111173	yes	yes	0.00046232	101.78	4897500	24902	48651	24950	130390	162180	29800	0	0	4809	0	24077	23413	12304	31599	0	7796.6	0	0	0	120610	44457	9793.4	0	0	0	0	0	0	10441	19941	17985	58597	0	64310	21627	0	0	103460	31645	27090	18834	0
VDEASFFGYAAGTASGIASNSR	frv2_111173	frv2_111173	yes	yes	2.2043e-97	199.75	25594000	123650	103500	0	254480	583850	190120	42692	61843	71157	0	74776	93612	141700	157080	152000	120890	5415.8	130290	0	344530	214030	55875	39082	101190	233510	110440	0	0	62483	0	192290	201600	0	299100	93800	0	46414	423560	359850	288810	378420	142890
ATNPGLVYDITEADYADFLCGEGYTAK	frv2_111175	frv2_111175	yes	yes	0.016714	43.306	321680	0	0	0	0	0	0	0	0	0	0	0	0	94781	0	61250	0	0	40835	0	0	0	0	0	0	0	0	0	0	0	0	0	0	0	0	0	0	0	0	0	0	0	0
AVYNLNLPSFALK	frv2_111175	frv2_111175	yes	yes	4.9726e-08	127.02	4600700	0	44545	0	156150	154460	0	0	0	0	0	0	0	0	0	0	0	0	0	0	0	0	0	0	0	0	0	0	0	0	0	0	0	0	0	0	0	0	269680	87665	127850	0	0
GPNPITPNILKPDIAAPGVNVIAAWTPLNPISEFEDDKR	frv2_111175	frv2_111175	yes	yes	1.9284e-08	71.212	48470000	77792	121960	197580	723840	3624400	126820	0	0	0	0	312030	226880	0	615180	310400	533950	0	163540	0	225640	0	0	0	0	420850	0	0	0	0	161680	205220	0	0	200590	0	135720	0	1637200	1214200	1247800	0	295660
IIGAQYFNIK	frv2_111175	frv2_111175	yes	yes	1.7479e-35	204.42	42555000	102600	187220	181390	1661400	1137300	368840	31524	42059	55664	0	47635	134680	182610	311630	155100	127260	4652.6	29689	0	667670	444600	0	0	187470	234480	0	50870	0	66580	244020	353200	0	0	426540	337390	0	0	1149800	0	403500	0	0
IIGAQYFNIKR	frv2_111175	frv2_111175	yes	yes	0.043119	112.71	2938500	0	0	0	0	120170	0	0	0	0	0	0	43870	55101	123080	38330	32337	0	0	0	0	0	0	0	0	0	0	0	0	0	0	0	0	0	0	0	0	0	47327	26201	57590	0	0
KVVITPYFK	frv2_111175	frv2_111175	yes	yes	0.0038907	117.53	11610000	0	25570	24583	110170	295630	21106	6179	0	12808	0	24376	47034	50233	103260	53292	53368	0	20673	11847	116680	100860	34076	10504	28498	81645	16762	0	0	17613	98795	115230	95805	0	0	0	0	19153	387640	200450	174630	82286	78546
MNLESDIIVGVIDSGIWPK	frv2_111175	frv2_111175	yes	yes	1.4454e-69	188.86	28885000	17301	31967	43233	176570	235730	177560	0	0	50379	0	14393	68252	243630	328530	33987	245770	0	87539	0	242350	335100	22400	0	70307	330120	72272	0	0	0	0	174510	53243	0	458480	180510	31107	0	1019600	387840	240060	0	73860
NVFDIGSFHAMK	frv2_111175	frv2_111175	yes	yes	3.837e-06	150.51	30340000	0	28609	37227	284380	789120	33820	0	0	10211	0	14444	18375	24108	0	24626	27715	0	15180	0	511770	561940	32532	9562.6	29132	30314	0	0	0	37818	41923	83080	150940	0	449530	68644	0	0	831280	399820	351700	0	0
RMNLESDIIVGVIDSGIWPK	frv2_111175	frv2_111175	yes	yes	0.0023997	65.765	2886000	0	0	0	0	143320	0	0	0	0	0	0	17463	23555	0	23443	23491	0	0	0	0	0	0	0	0	0	0	0	0	0	0	0	0	0	0	0	0	0	160210	72878	0	0	0
SAIMTTATPMSHALNPEAEFAYGAGQINPVK	frv2_111175	frv2_111175	yes	yes	9.4388e-45	125.91	314020000	246010	270130	349110	1463500	3820800	1529300	152500	213370	442060	0	712110	1130900	2132900	2806500	2026100	1849500	16910	865250	0	4446000	2955800	84734	0	919040	2200100	741580	224730	221830	375530	318560	2926100	2892900	978800	3588900	1681100	474150	162740	6727800	5341600	4372800	3771500	1932800
SPIVVYGK	frv2_111175	frv2_111175	yes	yes	0.00080228	128.61	2528000	0	0	0	0	0	0	0	4861.2	0	0	0	0	14481	13274	0	0	0	15496	0	53624	34058	0	0	5371.1	0	0	0	0	0	0	25656	61387	0	79882	0	13988	0	106000	0	0	0	34007
SWDFIGLPHNSK	frv2_111175	frv2_111175	yes	yes	1.742e-11	171.26	86515000	121960	183250	180710	794170	1868400	360020	65113	89328	122550	0	62398	102190	307010	588160	283460	258500	0	102110	0	829610	701150	501460	204550	408380	603660	441510	0	0	0	154550	557140	1335000	0	1171700	601750	119350	0	1711400	901010	1067100	1532400	542880
SWDFIGLPHNSKR	frv2_111175	frv2_111175	yes	yes	0.0037536	110.38	4776700	0	0	12798	39420	139650	0	0	0	0	0	21095	29459	56907	311670	53459	85458	0	25932	0	18118	0	0	0	0	42134	0	0	0	0	0	33057	0	0	0	0	0	0	93368	165680	177470	0	131250
TVTNVGSATSTYK	frv2_111175	frv2_111175	yes	yes	0.00040671	103.11	1911900	0	10029	11596	42888	64984	6432.8	0	0	5630.8	0	5960.7	15245	6789.2	0	13340	13312	0	11101	0	41328	41337	0	0	0	0	0	0	0	0	0	0	0	0	0	0	0	0	0	0	0	0	0
VVITPYFK	frv2_111175	frv2_111175	yes	yes	0.020024	84.743	6294300	0	31328	34557	129060	177920	0	0	0	0	0	16043	23636	26329	0	25805	25196	0	0	0	46295	0	39789	13460	0	46725	0	0	0	0	39227	0	93764	0	64516	0	0	0	212700	109970	87049	74648	0
MKETAEAYLGK	frv2_111200	frv2_111200	yes	yes	0.013926	95.273	2419100	10016	11182	0	26779	33537	11889	0	0	7740	11250	14598	12484	14671	22317	15043	17712	0	11522	26649	23173	0	13077	8209.2	15814	38076	15960	0	0	20962	25252	29904	41307	0	82178	60652	21015	12798	31837	21294	22643	24288	17365
GEALSLHSLSGTSSVDWLQGYLVSR	frv2_111213	frv2_111213	yes	yes	4.6558e-12	101.89	6049200	0	0	0	0	0	0	0	0	0	0	0	0	0	0	0	0	0	0	0	0	144380	0	0	0	226450	0	0	0	0	0	202500	0	0	0	0	0	0	0	0	0	0	0
GQVWLNGQHLGR	frv2_111213	frv2_111213	yes	yes	1.9409e-05	121.02	7881800	0	0	0	37718	164340	29467	8214.7	9407	29177	0	0	0	24968	31960	31113	40350	0	0	0	42223	51441	0	0	0	59615	19826	0	0	0	67774	63118	89351	0	233200	117960	0	0	78847	62123	127900	106350	55889
PTGNLLVMFEELGGNPNGVFLVR	frv2_111213	frv2_111213	yes	yes	2.6239e-08	94.271	2894600	0	0	0	0	134810	37208	0	0	0	0	0	0	8168.6	0	5358.5	12585	0	8891.1	0	0	67414	0	0	0	32688	0	0	0	0	0	0	0	0	48697	0	0	0	0	0	0	0	0
TTFDAPLGVAPLALDMVSMGK	frv2_111213	frv2_111213	yes	yes	4.7501e-98	203.81	34770000	0	0	56845	209640	848520	280240	31171	10596	167740	0	0	0	53730	0	112550	0	0	141440	0	150210	216120	0	0	0	325490	103380	0	0	0	98216	310330	167870	244170	684090	261990	149870	0	219500	243550	291330	261930	268240
FDVESLFILTSNILK	frv2_111231	frv2_111231	yes	yes	5.2623e-23	174.24	1513300	0	11856	16764	53006	44764	0	0	0	0	0	6596.7	0	0	0	0	0	0	0	0	117190	46645	0	0	0	0	0	0	0	0	0	0	0	0	0	0	0	0	42983	0	0	0	0
FWIGIESLFANMIQK	frv2_111231	frv2_111231	yes	yes	1.2619e-74	214.48	1183800	0	0	0	50996	0	0	0	0	0	0	0	0	0	0	0	0	0	0	0	0	63249	0	0	0	0	0	0	0	0	0	0	0	0	0	0	0	0	0	0	0	0	0
ILWIPVVDEWTLLHK	frv2_111231	frv2_111231	yes	yes	0.00055475	94.781	3750300	0	31912	0	0	112860	0	0	0	0	0	28819	0	0	0	0	0	0	0	0	109130	164340	0	0	0	0	0	0	0	0	0	0	0	0	0	0	0	0	101150	49790	0	0	0
LDMPWYVAEYFYPLAGIR	frv2_111231	frv2_111231	yes	yes	2.3626e-05	104.2	5124100	0	56790	43566	159570	0	0	0	0	0	0	0	0	0	0	0	0	0	0	0	256320	211570	0	0	0	0	0	0	0	0	0	0	0	0	0	0	0	0	230590	31220	0	0	0
NVLVFISGLDSIRDEIR	frv2_111231	frv2_111231	yes	yes	1.5831e-15	133.96	1620300	0	0	0	0	0	0	0	0	0	0	0	0	0	0	0	0	0	0	0	86465	84425	0	0	0	0	0	0	0	0	0	0	0	0	0	0	0	0	0	47129	0	0	0
QDQPGWVLLSK	frv2_111231	frv2_111231	yes	yes	0.0043802	87.216	891710	0	0	0	0	0	0	0	0	0	0	0	0	0	0	0	0	0	0	0	136270	38881	0	0	0	0	0	0	0	0	38253	0	0	0	0	0	0	0	0	0	0	0	0
TGTPVGLIEDKVPLPGYEPPFR	frv2_111231	frv2_111231	yes	yes	3.41e-05	86.748	10979000	72560	0	85080	275660	306210	0	0	0	0	0	0	0	39402	0	0	0	0	0	0	986740	0	0	0	58058	0	66092	0	0	0	0	0	0	0	0	144080	0	0	784810	0	0	0	0
VLIFHNEIQDPLVYDGLNR	frv2_111231	frv2_111231	yes	yes	6.4411e-38	155.2	8880500	39026	0	0	0	199760	0	0	0	0	0	0	18461	0	0	0	0	0	0	0	909810	306910	0	0	0	0	0	0	0	56970	0	182060	89970	0	172530	0	0	0	376020	97111	147230	0	0
FIAVATR	frv2_111235	frv2_111235	yes	yes	0.012563	95.352	1413400	0	0	0	14447	0	6759.8	5494.8	0	20794	0	0	0	0	11410	9972.4	10746	0	16583	0	0	0	17714	9352.6	0	30776	17662	36102	0	0	0	18146	62702	0	57505	50467	73643	0	0	10278	0	12810	12900
FIGSFPVFSPR	frv2_111235	frv2_111235	yes	yes	1.397e-08	169.65	14699000	0	0	0	0	421410	70483	34567	52616	317050	0	0	0	28826	38511	49022	65902	10858	258250	0	122100	0	44547	17198	49599	246180	163340	187420	0	0	0	0	260020	0	0	0	763040	0	0	0	190310	125980	80765
FVSPQTHHLNPFISPDATR	frv2_111235	frv2_111235	yes	yes	1.0699e-08	114.28	36681000	20222	21768	0	0	0	167960	15383	35279	839950	0	0	59064	115210	361540	179180	186580	0	832500	91562	119440	142440	42779	32019	96593	777570	532460	492060	0	0	0	319430	890820	0	672500	863560	1319200	0	0	141360	331090	395070	210240
GIDNWWSIYR	frv2_111235	frv2_111235	yes	yes	9.1969e-05	157.68	13833000	0	20998	0	66452	142030	95163	25652	30433	261910	0	26748	35004	40359	66167	46592	86111	0	249740	0	81084	57123	34211	0	51396	275990	186630	144510	0	0	0	59236	180660	0	293640	0	558810	0	0	58237	87524	179610	63856
HDPGSGSFEVYLIHPDGTGLK	frv2_111235	frv2_111235	yes	yes	4.2053e-43	149.86	27873000	49988	0	0	111450	176180	192580	0	42191	487920	0	0	38403	46565	0	56717	41597	0	225990	0	0	55321	0	0	142810	305850	309260	409520	157190	57720	0	0	234300	0	588640	397180	503540	0	0	0	59628	308410	189480
HDPGSGSFEVYLIHPDGTGLKK	frv2_111235	frv2_111235	yes	yes	7.1598e-05	82.859	6474300	0	0	0	0	0	19359	0	0	119460	0	0	0	0	35346	25935	25518	0	160440	0	70530	87486	0	0	0	141170	0	91105	0	0	0	0	0	0	222900	109130	248620	0	0	33883	99876	237890	80654
HIELFDLVNNEFK	frv2_111235	frv2_111235	yes	yes	6.0881e-12	163.99	21163000	0	0	0	0	137300	139200	25631	41665	712950	0	0	0	0	0	57572	61767	0	383680	0	0	119920	0	0	32750	528530	305960	360020	0	0	0	189370	0	0	562850	262660	1103400	0	0	0	194170	265520	107610
HIELFDLVNNEFKELTR	frv2_111235	frv2_111235	yes	yes	0.00056809	82.578	1587400	0	0	0	0	0	0	0	0	0	0	0	0	0	56046	53273	90782	0	141560	0	0	0	0	0	0	0	0	0	0	0	0	0	0	0	0	0	0	0	0	0	0	0	0
ILYVDLPGVYVVNR	frv2_111235	frv2_111235	yes	yes	4.4885e-09	127.02	19894000	0	0	0	0	324330	122050	33747	45394	604350	0	0	28214	47655	46876	44438	108460	0	419530	0	0	114420	0	0	60305	354750	237240	586550	0	0	0	158220	139210	0	260110	0	1111600	0	130710	179690	258250	0	199210
LTHNSYEDGTPAWSPK	frv2_111235	frv2_111235	yes	yes	5.6532e-38	184.21	10489000	0	0	0	0	58343	37897	37488	35956	231950	0	0	12479	23412	55300	34872	42754	0	157690	0	0	29825	46189	32179	56894	159520	248040	228210	0	6106.6	24408	90768	235410	0	299750	302790	446680	0	0	17054	64104	103500	87196
LTPYGVADFSPAVSPSGK	frv2_111235	frv2_111235	yes	yes	2.1004e-05	105.01	6958900	0	0	0	0	0	0	0	0	244330	0	0	0	36683	81531	55593	59657	0	192950	0	0	40196	0	0	0	0	111100	134560	0	0	37301	128520	0	0	181440	265160	337910	0	0	39061	0	0	0
NLYVMNAVEGEKEGLR	frv2_111235	frv2_111235	yes	yes	8.2411e-19	140.93	3627300	0	0	0	0	0	0	23858	20976	84046	0	0	0	0	30795	14796	27933	0	88663	0	0	36582	0	0	32206	118340	73829	80169	0	0	0	62133	93338	0	142920	90447	103140	0	0	0	0	0	35227
NSIIFTTLGR	frv2_111235	frv2_111235	yes	yes	1.1618e-17	188.27	14725000	0	0	0	61212	94484	70848	35883	94141	216820	0	16546	18546	36220	103220	49979	63787	0	204840	0	57362	75177	160450	91100	161860	381900	479680	423850	0	0	45087	127160	232510	0	283630	323840	456670	0	0	0	114140	164860	149060
RLTPYGVADFSPAVSPSGK	frv2_111235	frv2_111235	yes	yes	3.5255e-12	125.03	13343000	0	0	0	54199	102110	53670	29246	16316	254450	0	24526	62111	66953	162830	67438	120250	0	363660	0	0	28226	0	0	0	243870	121150	158320	0	0	0	79496	0	0	189270	234320	520000	0	0	50116	103290	0	52365
SLVFTSDYAGISAEPISNPHHYQPYGEIFTVR	frv2_111235	frv2_111235	yes	yes	9.1726e-27	106.06	53633000	0	0	0	0	396470	452840	0	0	1148900	0	72283	39858	238620	581710	107690	367500	0	1186100	0	0	203290	0	0	0	1377800	240780	146450	0	0	0	565790	0	0	1957000	0	1936100	0	0	601940	368640	0	617140
SPVPNLTLFR	frv2_111235	frv2_111235	yes	yes	0.0071589	83.081	3013300	0	0	0	0	0	23187	8284	13169	98272	0	0	16697	13831	0	0	21495	0	79343	0	0	0	0	0	0	102430	56942	73065	0	0	0	0	89140	0	0	0	0	0	0	0	0	0	0
TNHPYFSPDGK	frv2_111235	frv2_111235	yes	yes	0.009284	69.721	1299800	0	0	0	0	0	6283.9	0	5052.3	40984	0	0	0	0	7916.8	4551.5	8559	0	39282	0	0	0	0	5266.1	7463.5	18366	23518	30520	0	0	0	0	16950	0	36199	33856	82353	0	0	0	0	16700	7989.8
VSNTSPQFLLENVR	frv2_111235	frv2_111235	yes	yes	1.6291e-18	166.79	6934500	0	0	0	57073	0	0	12988	0	141210	0	0	28418	16944	0	0	33266	0	94984	0	0	115590	71122	0	0	164960	0	239750	0	0	0	100710	193240	0	245140	0	358260	0	0	0	0	0	0
VTPPGLHAFTPATSPGNHK	frv2_111235	frv2_111235	yes	yes	0.00018663	86.772	5862200	0	0	0	0	121050	19778	5955.1	0	81209	14806	0	10736	12281	51494	19176	24448	0	45174	0	46143	43531	0	0	33661	137830	91405	115130	0	0	0	75537	168390	0	239960	189040	310580	0	31331	25940	57735	93280	47695
YMKPVNVERPK	frv2_111235	frv2_111235	yes	yes	0.018623	89.827	1550700	0	0	0	0	25535	0	0	0	27628	0	0	0	0	8387.9	9676	0	0	39275	0	12479	0	0	0	0	28725	29907	0	0	0	0	0	22562	0	0	58838	79086	0	0	0	18563	0	13946
DLVLGQGALVPLLAQLNEHAK	frv2_111243	frv2_111243	yes	yes	0.0017869	62.658	5906100	0	0	0	0	0	48796	0	0	42403	0	0	36154	22004	48778	57128	36601	0	40567	0	0	117200	0	0	0	138640	0	0	0	19920	0	120550	0	0	0	56455	63346	0	0	49557	0	0	0
EAAWAISNATSGGSHEQIK	frv2_111243	frv2_111243	yes	yes	0.01999	55.031	1431500	0	0	0	0	0	0	0	0	15241	0	0	7138.2	0	15346	11486	6353.5	0	14648	0	31028	27001	9656.9	0	0	0	18817	0	0	0	29128	0	0	0	63638	67418	0	0	33986	17551	44097	0	0
EGLQPQQIPSSIHSVVEK	frv2_111243	frv2_111243	yes	yes	2.3744e-05	104.16	8000100	0	0	46936	0	0	70854	11469	20708	25860	0	65129	17626	16851	97071	15789	38348	0	80460	37591	142530	92422	19576	0	82722	164180	234490	48193	0	0	31809	0	0	0	0	0	0	0	194800	38425	93064	0	93627
LVELLLHPSPSVLIPALR	frv2_111243	frv2_111243	yes	yes	0.00045133	99.238	0	0	0	0	0	0	0	0	0	0	0	0	0	0	0	0	0	0	0	0	0	0	0	0	0	0	0	0	0	0	0	0	0	0	0	0	0	0	0	0	0	0	0
NIGNTGDVNLYAQLIDDAEGLEK	frv2_111243	frv2_111243	yes	yes	0.00054657	68.916	3397800	0	0	0	0	0	53354	0	0	0	0	0	0	0	0	0	0	0	0	0	0	0	0	0	0	0	40745	0	0	0	0	0	0	0	0	0	0	0	0	0	93688	0	0
TPPIEEVIQTGVVSR	frv2_111243	frv2_111243	yes	yes	0.0013273	84.508	11728000	0	0	0	0	161750	56440	0	18782	54883	0	0	0	53451	0	42353	31748	0	29210	0	162820	0	70978	16322	0	92514	61955	34942	0	88988	0	106300	185240	0	265980	194390	93487	0	281450	138000	171900	153050	107600
SRQVPNVTASASTGVASVTIK	frv2_111278	frv2_111278	yes	yes	0.034491	45.469	14765000	0	0	0	0	0	0	0	0	0	0	0	0	0	0	0	164370	0	0	0	445030	187160	0	0	0	0	0	0	0	0	51719	0	324800	0	0	0	0	0	0	0	0	0	0
MALWEEISQSLLADGISR	frv2_111298	frv2_111298	yes	yes	8.7084e-48	180.03	4490700	58810	59688	37503	147120	282550	0	0	0	26685	77652	0	16235	20168	0	0	0	0	0	178320	0	43278	0	0	0	0	0	0	55903	23656	0	0	0	0	0	0	0	0	0	0	0	0	0
VITTQFASNLHR	frv2_111298	frv2_111298	yes	yes	0.03398	59.227	998920	6107	9426.4	7188.7	30214	48770	0	0	0	0	17771	9684.9	0	0	0	0	0	0	0	79103	25412	0	0	0	0	0	0	0	0	12289	0	0	0	0	0	0	0	25232	30785	0	0	0	0
WIIYTSSPINFNHDGSEVK	frv2_111302	frv2_111302	yes	yes	0.0016439	68.978	9743400	0	0	0	0	0	0	0	0	0	0	57871	131020	161150	329490	220700	223100	5486.4	148050	0	274770	259760	39551	22438	63830	255090	69546	0	0	0	0	266390	280150	0	244280	0	63922	0	185760	0	0	71412	143960
LINEVLAEAESGGNGLVTR	frv2_111308	frv2_111308	yes	yes	1.8007e-19	137.23	11784000	75053	119030	68389	227960	333740	0	0	0	0	0	19586	0	0	0	0	0	0	0	491440	0	185560	0	0	0	0	0	0	236060	0	0	0	404920	0	0	0	0	0	250690	126900	0	0	0
NQYSAPSSIPSYTHQGSSK	frv2_111308	frv2_111308	yes	yes	0.0038238	66.893	1069600	0	0	0	0	0	0	0	0	0	0	0	0	15112	0	0	0	0	0	0	46740	31557	0	16058	0	0	0	0	0	0	0	0	0	0	45338	19443	0	22176	76163	0	24985	0	0
TKFDVVTPTPYESTDFK	frv2_111308	frv2_111308	yes	yes	0.03446	67.645	439120	0	0	0	0	0	0	0	0	0	0	28772	15848	0	0	0	0	0	0	0	33414	0	0	0	0	0	0	0	0	0	0	0	0	0	0	0	0	0	0	0	0	0	0
TKFDVVTPTPYESTDFKNQYSAPSSIPSYTHQGSSK	frv2_111308	frv2_111308	yes	yes	0.043736	27.987	1692100	0	0	0	0	0	0	0	0	0	0	209650	64687	87313	257290	0	52548	0	0	0	0	0	0	0	0	0	0	0	0	0	0	0	0	0	0	0	0	0	0	0	0	0	0
ATVIWTHNDGTGSPGFVAESTGHQR	frv2_111324	frv2_111324	yes	yes	1.0699e-05	76.744	362660	0	0	0	0	0	0	0	0	0	0	0	0	0	0	0	0	0	9428.4	0	0	0	0	0	0	47844	0	0	0	0	0	0	0	0	53908	59537	0	0	0	0	0	0	0
LVANDPVFR	frv2_111330	frv2_111330	yes	yes	0.037086	64.654	2535800	0	0	0	27097	44933	15005	0	0	19084	0	0	0	16611	13616	13382	9990.5	0	16837	0	0	26092	35246	20129	20616	33097	41360	14519	34044	0	29866	48293	75853	0	147760	0	58534	0	89592	56751	93042	90321	96981
LYEEAWKDPLNDSVVPDGFHQYVQPILR	frv2_111330	frv2_111330	yes	yes	5.8797e-37	124.19	19404000	0	0	0	0	0	0	0	0	0	299610	76409	149220	0	0	66977	108850	0	96588	293160	0	193530	0	0	0	0	133010	0	0	192890	126240	283320	0	0	1082200	0	602690	133810	1433100	667280	768180	120420	812320
ALHDALSIVK	frv2_111347;frv2_46092	frv2_111347	yes	yes	0.0073538	82.831	1897300	0	0	0	0	0	0	0	0	0	0	0	6200.3	0	0	0	0	0	0	25934	48298	28994	0	7049.1	11918	0	0	12933	28631	8649.3	0	37018	60980	0	88488	94617	40942	0	0	0	0	0	0
ALHDALSIVKR	frv2_111347;frv2_46092	frv2_111347	yes	yes	0.064732	52.49	926930	0	0	0	13336	53738	0	0	0	0	10387	0	11748	5153.5	13331	11513	16522	0	12968	12195	0	12787	0	0	0	20554	0	0	0	0	0	16832	10956	0	0	0	0	0	25718	21059	14783	0	18405
YFVEAGAIAVR	frv2_111347	frv2_111347	yes	yes	0.00037539	117.14	1966400	0	0	0	0	88173	0	0	0	51794	0	0	0	0	0	0	16138	0	0	0	77561	50178	0	0	0	0	0	0	0	16577	19262	0	0	0	155360	0	0	0	0	0	0	97443	0
AESEAGDEGALVTEVDIQHIVAAWTGIPVDK	frv2_111349	frv2_111349	yes	yes	4.0556e-10	77.939	2160400	41469	0	0	0	0	0	0	0	0	0	0	0	0	0	0	0	0	0	190710	0	0	0	0	0	0	0	0	121400	36578	0	0	0	0	71993	0	0	0	0	0	0	0	0
ALATYYFGSEEAMIR	frv2_111349	frv2_111349	yes	yes	3.9347e-14	145.52	54932000	382400	435210	506330	1117800	0	0	0	0	0	0	406310	401740	373240	851710	416210	536220	0	0	0	0	0	221760	0	0	0	630850	0	454110	0	0	1444700	0	0	2778000	1342500	0	0	0	1307700	0	1790700	1620600
FQPVKVPEPTVSETIQILK	frv2_111349	frv2_111349	yes	yes	0.00050417	82.709	8734100	56277	123060	97520	317470	240470	0	0	0	0	166220	94975	68349	48577	64228	26952	29507	0	25165	0	135690	0	0	0	0	0	0	0	130740	53450	0	0	0	0	0	0	0	177370	192610	0	0	0	0
IIGQHEAVEAISR	frv2_111349	frv2_111349	yes	yes	2.3654e-08	135.14	10630000	92941	74617	67645	192280	198830	9484.1	6405.2	12831	15707	95741	66029	33160	30120	75983	29281	13160	0	13716	309800	91364	47424	36952	9516.8	16823	43942	47917	18371	151700	93420	85632	93546	76665	0	160760	84110	56559	199540	142930	72694	71130	47182	60410
RFQPVKVPEPTVSETIQILK	frv2_111349	frv2_111349	yes	yes	0.0017954	81.807	2783500	0	0	0	0	0	0	0	0	0	104040	95426	0	58474	0	0	33402	0	0	0	0	0	0	0	0	0	0	0	0	0	0	0	0	0	0	0	0	0	0	0	0	0	0
RIIGQHEAVEAISR	frv2_111349	frv2_111349	yes	yes	0.0017414	85.271	1304300	7759.3	6662.5	0	44894	41509	0	0	0	0	36543	33634	15586	20302	0	0	0	0	0	94091	20409	0	0	0	0	0	0	0	18177	27019	0	0	0	0	0	0	0	0	0	10188	0	5882.5	0
YTDDALVAAAELSHQYISDR	frv2_111349	frv2_111349	yes	yes	3.7259e-28	144.41	22464000	279010	198330	87676	328530	0	86719	0	45879	52054	207990	42056	62043	50723	103950	48897	0	0	0	1369400	564700	86029	0	0	0	212640	86947	0	169550	314900	0	138840	133250	0	136520	0	70594	612820	389170	213830	130980	114780	0
YTDDALVAAAELSHQYISDRFLPDK	frv2_111349	frv2_111349	yes	yes	2.5314e-29	124.77	3478600	0	0	0	0	0	0	0	0	0	192260	130810	43441	0	68710	0	0	0	0	0	0	0	0	0	0	0	0	0	0	0	0	0	0	0	0	0	0	0	0	0	0	0	0
HLSHAYGTLAER	frv2_111363	frv2_111363	yes	yes	0.00021202	109.39	259020	0	0	0	0	0	0	0	0	0	0	0	0	0	0	0	0	0	0	0	0	0	0	0	0	0	0	0	0	0	0	0	0	0	0	0	0	0	0	0	0	0	0
EIQSQLLPIPDAFLGLR	frv2_111373	frv2_111373	yes	yes	2.9441e-05	107.72	15663000	30886	36961	55233	196320	283600	61866	7132.3	11892	75131	0	28418	49888	33554	80413	56445	61181	0	52808	0	173150	113510	18218	0	0	158860	66230	22731	0	0	0	154090	68543	0	244730	0	143660	0	274550	125330	263730	110570	123600
FIHYVNQDGR	frv2_111373	frv2_111373	yes	yes	0.0013311	101.9	4278500	0	6464.8	14192	34251	60544	20887	3665.8	5432.7	28105	0	15717	0	9065.2	9655.6	0	23793	0	13127	0	44440	17008	27486	5634.1	20501	49312	33072	0	0	6659.4	20384	34622	96297	0	71093	53234	62695	0	48702	14637	44097	19943	43839
LTQYINR	frv2_111373	frv2_111373	yes	yes	0.036677	78.77	587280	0	0	0	0	0	0	0	0	0	0	0	4335.7	8822.7	0	8362.3	0	0	0	0	0	0	0	0	0	10488	0	0	0	0	0	0	0	0	0	0	0	0	11120	0	10451	0	0
SASSPNTDSLADALAIAQHHDAVSGTEK	frv2_111373	frv2_111373	yes	yes	1.5064e-05	65.881	13476000	0	0	0	0	0	115600	37947	38238	87410	0	0	44202	111480	225800	0	0	0	122310	0	149520	0	0	0	0	266690	126240	0	0	0	0	0	270740	0	385300	213550	93455	0	0	133880	259320	373220	156540
SGSPSDTFEVGLGNLK	frv2_111373	frv2_111373	yes	yes	0.0090521	66.246	3315700	0	0	0	0	0	40151	0	0	0	0	0	21351	47588	46264	36691	32063	0	26092	0	89529	0	0	0	0	0	0	0	0	0	26375	0	0	0	129640	0	0	0	0	58989	0	0	0
VHALYSTPSIYTDAK	frv2_111373	frv2_111373	yes	yes	2.5719e-09	122.97	7297800	0	0	0	0	69473	24967	8998.2	0	21123	0	15627	14527	34783	58631	46001	33899	0	23436	0	0	44415	51053	18935	0	39315	12896	0	0	0	22980	94837	97549	0	106760	50931	23734	0	58139	59157	96098	151580	123270
IVLGDLQTPFIK	frv2_111385	frv2_111385	yes	yes	0.00073779	101.53	1763300	0	0	0	0	0	0	0	0	0	0	0	0	0	0	0	0	0	0	0	0	0	0	28058	0	0	73066	0	0	0	0	102890	0	0	290230	223570	227800	0	0	0	0	0	0
EFMEALQAGADVSMIGQFGVGFYSAYLVAEK	frv2_111447	frv2_111447	yes	yes	0.044066	29.365	3923500	0	0	0	0	0	0	42257	75994	0	0	260480	0	0	0	0	134050	0	0	0	0	0	0	154220	0	0	0	0	0	0	0	0	0	0	0	0	0	0	0	0	0	0	0
GYEVLFMVDAIDEYAVGQLK	frv2_111447	frv2_111447	yes	yes	0.0008762	84.249	781360	0	0	0	0	0	0	0	0	0	0	0	55768	0	0	0	0	0	0	0	0	0	0	0	0	0	0	0	0	0	0	0	0	0	0	0	0	0	0	0	0	0	0
KGYEVLFMVDAIDEYAVGQLK	frv2_111447	frv2_111447	yes	yes	6.8048e-33	147.64	8720600	0	0	103730	331600	0	0	0	0	147890	0	0	0	0	0	0	138560	0	0	483340	297440	0	0	0	0	0	0	0	197730	0	0	0	0	0	0	0	160790	0	478250	0	0	0	0
KPEEISKDEYAAFYK	frv2_111447	frv2_111447	yes	yes	0.00018602	114.64	836740	0	0	0	0	0	0	0	0	0	13049	0	23760	0	0	48453	30404	0	14375	0	0	0	0	0	0	0	0	0	0	0	0	0	0	0	0	0	0	0	0	0	0	0	0
MILFATGMENIR	frv2_111451	frv2_111451	yes	yes	5.2944e-34	202	13174000	0	0	0	0	296160	127900	19117	39678	138830	0	0	0	48818	47090	0	47532	0	51574	0	0	182890	0	47698	82901	212530	102350	68497	0	0	0	313500	249800	0	329690	0	193720	0	0	0	141840	0	128880
FFGVLIEHYAGDFPLWLSPIQAR	frv2_111453	frv2_111453	yes	yes	0.0055818	50.404	746240	0	37996	0	0	0	0	0	0	0	34100	0	0	0	0	0	0	0	0	233160	0	0	0	0	0	0	0	0	72932	0	0	0	0	0	0	0	0	0	0	0	0	0	0
GYDLLYTPHVAK	frv2_111453	frv2_111453	yes	yes	0.002435	88.803	1423800	0	25347	0	57011	86872	0	0	0	0	21280	16330	9074.8	0	0	5787.1	0	0	8845.7	134120	36816	32080	16058	0	0	0	0	0	34089	0	0	0	0	0	0	0	0	28787	0	0	0	0	0
GPYQDFLLEPLFNFR	frv2_111457	frv2_111457	yes	yes	2.9454e-09	121.95	1513300	0	0	0	0	0	15495	0	0	55583	0	0	0	0	0	0	0	0	12015	0	0	0	0	0	0	0	20696	0	0	0	0	0	0	0	51503	0	76268	0	0	0	0	18016	0
GTDPGVMIYMLPLGR	frv2_111457	frv2_111457	yes	yes	0.00059169	94.09	1431700	0	0	0	0	0	0	12957	13061	131820	0	0	0	0	0	0	0	0	75765	0	45581	0	0	16738	38617	0	0	82305	0	0	0	0	0	0	0	88528	0	0	0	0	0	47442	0
SGNVLLTQTVVPAASSDPYLR	frv2_111457	frv2_111457	yes	yes	1.3362e-11	122.18	5470500	0	0	0	0	0	0	0	0	90910	0	0	29307	41367	0	35286	48473	0	97137	0	0	0	35924	17989	0	0	66363	49981	0	0	0	0	80269	0	195690	168480	204790	0	0	0	0	0	0
SSIHDVVLVGGSTR	frv2_111461	frv2_111461	yes	yes	0.00069475	95.822	8665900	0	0	0	0	0	0	0	0	0	0	0	0	0	242420	181260	121540	0	0	396210	0	0	0	322930	0	0	0	206080	0	0	0	0	1183700	0	0	0	0	0	676190	0	0	0	360550
AVGIYASLVNINAYHQPGVEAGKK	frv2_111474	frv2_111474	yes	yes	0.066387	36.454	3883600	0	0	0	0	324280	0	0	0	0	91433	0	50324	32130	121090	41455	36787	0	0	340300	0	0	0	0	0	0	0	0	110380	0	0	0	0	0	0	0	0	0	0	0	0	0	0
DGVHNFFATFIEVLR	frv2_111474	frv2_111474	yes	yes	0.0004483	96.773	2837100	47384	49064	63253	170210	297980	0	0	0	0	86949	64306	20977	21567	37525	20644	30213	0	11649	135200	0	0	0	0	0	0	0	0	0	18216	0	0	0	0	0	0	0	0	0	0	0	0	0
FIDNTDPAGIDHQIAQLGPELASTLVIVISK	frv2_111474	frv2_111474	yes	yes	2.9322e-20	98.225	3858600	33619	0	41900	144520	222730	0	0	0	0	133090	107430	0	14398	0	0	17008	0	0	314120	0	0	0	0	0	0	0	0	115520	0	0	0	0	0	0	0	0	0	107000	0	0	0	0
FPMFDWVGGR	frv2_111474	frv2_111474	yes	yes	0.00094033	142	7806300	60149	80037	75211	357500	0	0	0	0	0	87873	46400	37439	37855	36150	30155	20119	0	0	395290	108910	0	13588	0	0	27765	0	0	104010	59096	0	0	0	0	75410	0	0	101190	101070	70817	0	0	0
GSTDQHAYIQQLR	frv2_111474	frv2_111474	yes	yes	0.0018652	87.641	1081900	6703.3	12649	6377.5	27425	54128	0	0	0	0	11882	9587.4	0	0	0	0	0	0	0	51495	26506	0	0	0	0	8790	0	0	28566	20564	26999	0	0	0	21231	0	0	18812	0	17630	0	0	0
IIAHMAANDR	frv2_111474	frv2_111474	yes	yes	0.0034084	95.775	1903100	13997	13541	15700	29821	34132	0	0	4131.2	8202.4	22939	8016.7	9562.3	9030	16867	10245	7220.4	0	0	63905	27457	0	9407	6576.2	0	11455	6946.5	0	30838	21298	25462	0	34027	0	0	23704	0	0	26695	0	0	11069	0
SVGALVALYER	frv2_111474	frv2_111474	yes	yes	0.0095581	63.473	2022400	0	45482	94516	0	265730	0	0	0	0	52266	66133	0	24005	0	48125	0	0	0	155290	0	0	0	0	0	0	0	27504	0	0	0	0	0	0	36943	0	0	136370	0	0	0	0	0
TSEMSAVGLLPAALQTIDIR	frv2_111474	frv2_111474	yes	yes	0.0038916	89.917	18029000	107820	147110	139420	223260	667000	0	0	0	42386	176210	143570	105340	83692	139870	74395	55615	0	38186	626160	254020	139430	0	0	0	94549	0	0	247490	80665	0	108410	0	0	138390	0	0	132660	278900	146300	121710	0	0
VNQGLSVYGNK	frv2_111474	frv2_111474	yes	yes	0.00047022	140.78	609530	9496.5	13968	11623	24787	0	0	0	0	0	6582.7	4361	0	0	0	0	0	0	0	45636	16453	0	0	0	0	0	0	0	20599	12058	0	0	0	0	0	0	0	15214	0	0	7911.3	0	0
YLQQLVMESLGK	frv2_111474	frv2_111474	yes	yes	7.6592e-05	112.08	6498500	0	68114	42439	159520	229620	0	0	0	0	51471	0	19320	19572	0	0	0	0	0	364980	179990	89740	0	0	0	0	0	0	188200	75772	0	52506	0	0	0	0	0	131030	144360	0	0	0	0
YLQQLVMESLGKEYDLDGNR	frv2_111474	frv2_111474	yes	yes	0.0090422	57.708	1385100	0	37724	57618	0	0	0	0	0	0	111790	72323	34168	29652	0	0	0	0	0	156050	0	0	0	0	0	0	0	0	0	0	0	0	0	0	0	0	0	0	0	0	0	0	0
IAPFPPAFQAIAR	frv2_111503	frv2_111503	yes	yes	0.034143	58.274	9131300	0	0	0	121040	0	41793	18599	0	52127	0	26452	0	0	23589	20076	24750	0	29743	0	0	87088	49677	45333	62013	0	71107	36950	0	0	0	130890	173250	0	234260	167950	101380	0	105040	98730	75760	204620	146770
LYDLLLQNTSDLSDLVSSGR	frv2_111503	frv2_111503	yes	yes	8.2546e-05	90.397	7420400	0	0	0	139290	0	63589	0	0	112770	0	0	0	46617	60205	0	37539	0	46587	0	0	74638	0	0	0	172070	121620	0	0	0	0	121840	94398	0	0	0	0	0	130580	129480	0	0	106580
NPIVLDLAYNTIEFPDIEHR	frv2_111503	frv2_111503	yes	yes	4.0324e-07	107.72	4801700	0	0	0	0	0	67952	0	0	0	0	0	0	0	0	0	43784	0	0	0	72349	0	0	0	0	0	0	0	0	0	0	0	0	0	162390	0	79748	0	0	0	116980	79175	101740
ALPQAIPTASSVSGGSGSAGTGNR	frv2_111520	frv2_111520	yes	yes	4.6414e-39	140.13	9580200	0	0	0	0	120840	45070	17459	48409	57866	0	17531	20452	29355	96896	42855	26693	0	40743	39222	70048	99566	103950	63970	67439	133550	136740	45973	0	0	0	126490	298640	41910	211880	200280	66901	0	100800	0	140720	204320	108730
QPPSQPPSGPPPPAQQFYGTPSQGYESPSSR	frv2_111520	frv2_111520	yes	yes	0.03667	30.945	1898200	0	0	0	0	0	0	0	0	0	0	0	0	0	0	0	0	0	0	0	0	0	38495	0	0	68338	0	0	0	0	0	0	0	0	0	128560	0	0	0	0	0	0	0
SGSSYSSGYGTLSGPAEPYR	frv2_111520	frv2_111520	yes	yes	3.3616e-07	109.77	6399300	0	0	0	0	0	0	18805	23214	33182	0	0	25408	41189	96598	41680	32535	0	28521	0	0	34564	79488	39414	42369	97782	95797	31674	0	0	52968	114370	243710	0	176220	184800	84275	0	56906	58421	62679	80408	68480
GDIEELFQSLTGDKLNL	frv2_111525	frv2_111525	yes	yes	0.00038886	102.89	912240	0	0	0	0	0	0	0	0	0	0	0	0	0	0	0	0	0	0	0	0	46588	0	0	0	66041	0	0	0	0	0	0	0	0	0	0	0	0	0	0	0	0	0
GVILDPLPFDMER	frv2_111525	frv2_111525	yes	yes	0.00054809	100.38	11365000	0	0	0	0	239310	107040	21334	41907	104460	0	0	0	40394	38331	45855	51447	0	83312	0	0	0	48034	29230	91628	365180	272940	0	0	0	0	80450	166540	0	329840	209590	205400	0	0	0	0	0	198370
YYKGDIEELFQSLTGDKLNL	frv2_111525	frv2_111525	yes	yes	0.00052184	89.669	2426200	0	0	0	0	265300	0	0	0	0	0	38987	0	0	0	0	42664	0	32183	0	0	0	0	0	0	0	0	0	0	0	0	0	0	0	0	0	0	0	0	0	0	0	0
HVGPGVLSMANAGPNTNGSQFFICTVPTPWLDNR	frv2_111576	frv2_111576	yes	yes	2.305e-06	64.806	14106000	0	0	0	0	0	0	0	0	0	822000	322770	0	223120	643010	355690	280710	0	0	0	0	671370	0	0	0	274940	0	0	450250	0	0	0	0	0	0	0	0	0	0	0	0	0	0
HVVFGHVIEGLDIVK	frv2_111576	frv2_111576	yes	yes	4.9416e-144	252.08	529450000	2595600	3592400	3641400	8973600	22472000	1511300	182810	153830	1662700	6442600	2756500	1965500	1639700	3660100	1474200	1357000	24768	969590	21731000	5276600	4370600	44488	0	359810	2482400	509060	244380	6305100	2786800	1294600	2168400	1014400	0	5115200	1307600	1128400	8576900	5471600	3581900	2771800	3872500	2267200
HVVFGHVIEGLDIVKK	frv2_111576	frv2_111576	yes	yes	5.1725e-25	164.22	7941500	60006	120640	99751	349350	825440	15886	0	0	0	89001	0	0	0	0	0	0	0	0	790340	174030	0	0	0	0	0	0	0	317760	22497	0	0	0	0	0	0	0	157590	173450	94059	135010	0	0
IIQNFMIQGGDFTEGNGTGGVSIYGSKFEDENFDLK	frv2_111576	frv2_111576	yes	yes	1.561e-110	162.81	380000000	3256600	2289200	2490500	4954500	9082600	1761000	0	0	801360	9106200	10392000	1466600	5117500	6625800	2713800	3521300	31358	1355900	9599300	228260	303060	0	0	0	1265200	106740	0	3641100	1780400	1949200	1969200	0	0	3395100	1056500	0	2581300	4182000	2538100	1860400	0	1039100
KLESQETSK	frv2_111576	frv2_111576	yes	yes	0.004366	144.77	1082600	0	12534	11253	116080	356000	0	0	0	0	0	0	0	0	0	0	0	0	0	0	0	0	0	0	0	0	0	0	87960	0	0	0	0	0	0	0	15318	30908	37894	10143	0	0	0
KLESQETSKLDNSPK	frv2_111576	frv2_111576	yes	yes	0.010304	81.565	2893000	22604	43327	47493	122010	363160	0	6650.1	0	0	31530	25807	21668	16789	35860	13802	21132	0	15650	0	13240	0	0	0	0	4786.8	0	0	45927	0	43595	0	0	0	8798.5	17412	17699	0	38255	0	0	0	0
TVTDAPQFDASNIASLQLMFSKFEYDGK	frv2_111604	frv2_111604	yes	yes	0.048992	35.228	1556800	0	0	0	0	0	0	0	0	0	0	0	0	0	0	29797	0	0	0	0	0	0	0	0	0	0	0	0	0	0	0	0	0	0	0	0	0	0	190400	0	118980	0	0
EYAELLDEFMHAVK	frv2_111629	frv2_111629	yes	yes	1.0678e-37	193.11	1647900	0	0	0	0	0	0	0	0	0	0	0	0	0	0	13114	22994	0	40095	0	0	0	0	0	0	54491	0	0	0	0	0	0	0	0	0	0	0	66456	160990	0	0	0	66871
ILGLGDLGAQGMGIPVGK	frv2_111629	frv2_111629	yes	yes	3.7138e-07	111.73	7199600	0	0	0	0	0	0	0	0	0	0	0	0	0	0	0	0	0	0	0	0	0	34149	0	0	0	64389	0	0	0	0	245440	199330	0	346530	241410	210380	0	0	0	474980	374250	370920
ILVQFEDFANHNAFDLLDK	frv2_111629	frv2_111629	yes	yes	0.0027168	64.588	3050500	0	0	0	0	0	0	0	0	0	0	85650	0	30592	0	52335	27627	0	0	0	0	0	0	0	0	0	0	0	0	0	0	0	0	0	267180	0	0	0	354750	210380	0	0	99053
AAVEEGIVPGGGVALLYASNELSK	frv2_111632	frv2_111632	yes	yes	5.5886e-30	130.37	103610000	305180	295730	262580	821550	1550500	558300	175600	208440	502830	356860	141170	319280	455130	574850	407720	399460	0	327610	1024500	1060500	708180	26363	0	494300	1004300	634780	247350	518920	251730	144550	1231200	1374300	324690	1873500	976670	722200	555550	1737500	1077100	1617600	965660	1333700
SAPANPFGDAFSGPEMWAK	frv2_111635	frv2_111635	yes	yes	3.4002e-110	216.16	78431000	238120	168660	176390	581470	1028200	504160	120080	209080	467930	206660	348160	313540	342680	930610	415770	383700	0	327750	427690	444800	354510	643500	422470	711580	947080	821750	176760	310700	166920	0	778620	1514200	0	1746000	1009400	645820	175450	666690	396390	500160	1438500	398000
AGSLVTILNENPPSPGSPTPIFFPN	frv2_111637	frv2_111637	yes	yes	4.692e-16	108.99	19385000	93599	40827	0	0	389010	275880	58454	87482	233420	0	0	0	0	107640	61504	0	0	0	0	280130	213810	0	56883	260420	249770	470940	208060	0	0	0	344440	0	0	662320	225880	147930	0	0	0	262500	270860	289070
FSQLNHIVYSELALK	frv2_111645	frv2_111645	yes	yes	0.058359	44.132	2084500	0	0	36796	0	0	0	0	0	0	0	18463	0	0	0	32479	35462	5378.4	40863	0	0	0	0	0	0	0	0	0	0	0	0	0	0	0	123990	150050	0	0	108000	108510	117280	0	125960
IVDIVLSHQGVK	frv2_111645	frv2_111645	yes	yes	1.9738e-05	122.33	4185500	0	0	0	0	0	0	0	0	6373.8	22452	39596	26825	41216	50224	25735	36938	0	41417	0	28343	42705	0	0	9029.5	79313	0	0	0	13175	33188	168110	162820	0	229020	169890	106880	12836	105580	73422	101980	99198	96562
KAEPFTGSFPILGPPTAISGK	frv2_111645	frv2_111645	yes	yes	0.00042142	74.776	6797400	0	0	0	0	0	0	0	0	0	46758	45147	74167	66814	103200	61969	81155	8989.4	94047	0	0	0	22292	0	0	0	0	0	0	0	0	0	173600	0	378000	230750	171220	0	0	272820	385730	235570	246420
LVEPLMSLVK	frv2_111645	frv2_111645	yes	yes	0.075574	52.725	830150	0	0	0	0	0	0	0	0	0	0	0	0	0	0	18029	22765	0	21707	0	0	0	22297	0	0	0	0	0	0	0	0	0	66028	0	108500	71564	0	0	0	0	88584	0	58332
MEDLVSAPLAVEDALVGLFDHSDNTLQR	frv2_111645	frv2_111645	yes	yes	6.6928e-06	73.461	7333400	0	72198	40533	0	0	0	0	0	0	34470	67934	0	55083	15288	17401	108180	0	232730	0	0	118870	0	0	0	122820	0	0	0	0	0	0	0	0	354400	198130	56878	0	296920	296390	362380	0	187780
SLQFLPAIISAALR	frv2_111645	frv2_111645	yes	yes	0.002057	83.633	1250800	0	0	0	0	0	0	0	0	0	0	0	19179	29666	34174	24716	40223	0	23674	0	0	0	0	0	0	0	0	0	0	0	0	0	0	0	0	0	0	0	123610	62073	0	21005	35010
NVVIEQSFGAPK	frv2_111647	frv2_111647	yes	yes	0.00022804	109.15	6577000	0	26371	27452	66076	213740	26669	12306	17353	41208	0	0	7055.1	8084	0	26702	0	0	0	35031	33426	30421	47573	23382	12015	44175	38393	0	19765	19765	35649	67356	183180	0	123430	190280	43081	46828	67509	49458	66491	91954	71437
EGVPTAVSHGLWLNIPDYDAPTQLVKPLER	frv2_111652	frv2_111652	yes	yes	2.2195e-29	118.9	54455000	0	0	0	0	0	512800	0	0	261400	325210	565720	253000	331830	444430	354840	397530	0	213490	0	1414700	978240	0	0	0	1653700	0	0	322050	145860	0	1162600	0	0	2063900	778380	553630	0	1431000	710110	1424800	0	0
GIFWQEDIIPFFQK	frv2_111652	frv2_111652	yes	yes	4.7165e-48	201.48	34980000	66961	110360	93117	424770	884210	225330	7748.6	0	115800	118910	298920	209460	271540	289170	249280	210620	0	167000	372920	250550	328280	0	0	0	363300	0	0	181170	60417	104890	394550	0	0	618150	161400	229240	82746	665840	317440	425280	33079	125590
IDPYFDKLADAMVTWIESWDELNPAGASAANGK	frv2_111652	frv2_111652	yes	yes	0.0064249	38.45	235170	0	0	0	24219	0	0	0	0	0	0	0	0	0	0	0	0	0	0	0	0	0	0	0	0	0	0	0	0	0	0	0	0	0	0	0	0	0	0	0	0	0	0
LADAMVTWIESWDELNPAGASAANGK	frv2_111652	frv2_111652	yes	yes	0.048424	36.948	1030500	0	0	0	0	0	0	0	0	0	0	0	0	0	0	0	0	0	0	0	0	69216	0	0	0	0	0	0	0	0	0	34584	0	0	122890	0	0	0	0	0	0	0	0
NLDFLEMWRPFFEPYHLIIVQDGDPSK	frv2_111652	frv2_111652	yes	yes	1.2328e-25	120.63	4644300	0	30404	0	0	534170	0	0	0	0	0	0	0	0	0	0	0	0	0	301950	0	0	0	0	0	0	0	0	0	0	0	0	0	0	0	0	0	0	0	0	0	0	0
TGLPYIFHSK	frv2_111652	frv2_111652	yes	yes	0.0026793	89.171	8185900	0	23869	0	123620	136070	31973	4861.9	0	41978	0	64065	58106	70341	69204	53517	58304	0	45390	0	109440	97803	32045	19889	29728	133870	41907	25158	41575	0	96882	140710	212700	0	103450	61680	38338	0	160330	0	155600	117790	64844
YVDAIMTIPK	frv2_111652	frv2_111652	yes	yes	0.0010892	139.15	6605500	0	0	0	0	0	0	0	0	0	33031	38411	0	50547	60685	32735	57037	0	28726	0	113340	101270	72832	0	0	116760	0	0	0	0	116940	118160	305350	0	0	0	0	0	183490	85802	159890	0	68599
LAAEAYSIFR	frv2_111655	frv2_111655	yes	yes	0.00093461	115.57	1428700	18516	0	38450	80021	143270	0	0	0	0	57960	29171	0	0	0	0	0	0	0	137850	0	0	0	0	0	0	0	0	0	0	0	0	0	0	0	0	0	0	0	0	0	0	0
AGILLHPTSFQSPYGIGDLGIEAFR	frv2_111675	frv2_111675	yes	yes	1.1513e-87	175.23	20500000	225010	338960	300280	889240	1229900	0	0	0	0	372900	175570	90811	62507	101520	67898	42659	0	0	1312800	253950	0	0	0	0	0	0	0	352010	124790	0	0	0	0	0	0	0	186160	292260	0	0	0	0
GFPLLVSGVPPDAFSETGQLWGSPLYDWK	frv2_111675	frv2_111675	yes	yes	0.012138	37.821	2280500	0	0	0	104720	162350	25411	0	0	0	0	0	0	0	0	0	0	0	0	157820	0	0	0	0	23510	0	0	266390	0	0	0	0	0	0	54361	0	47136	0	0	0	0	0	0
GLAGYWAVPSEAK	frv2_111675	frv2_111675	yes	yes	0.0053244	77.185	2155700	0	0	0	302030	581430	0	0	0	0	65621	0	21450	0	0	0	17478	0	0	0	0	0	0	0	0	0	0	0	0	0	0	0	0	0	0	0	0	0	92459	0	0	0	0
MNIPATQFGNWGWR	frv2_111675	frv2_111675	yes	yes	1.0834e-14	155.43	13773000	101250	183760	158150	469440	652720	0	0	0	38517	199870	97852	52194	42067	43232	47677	38956	0	20431	509660	148320	110360	0	0	0	0	0	0	209820	77930	0	0	0	0	186440	0	0	93194	152600	71976	0	0	0
VGPGTSFFNAISK	frv2_111675	frv2_111675	yes	yes	0.0041622	79.875	2284000	45783	70851	73077	163310	254880	0	0	0	0	87556	51034	35039	19853	30149	17581	16260	0	0	246980	89525	0	0	0	0	0	0	0	93277	0	43630	0	0	0	0	0	0	0	0	0	0	0	0
DFAAAHMIGAK	frv2_111696	frv2_111696	yes	yes	0.0001428	152.04	10285000	0	0	10526	36213	76541	0	18875	20893	69187	0	13418	13155	32100	85004	39230	3738.4	0	62048	0	59774	72569	108830	46650	74186	163070	132720	62218	0	0	74549	153470	371750	0	390490	364710	172060	0	64135	76741	127630	148150	127890
DVSGLVNLYR	frv2_111696	frv2_111696	yes	yes	1.4031e-12	156.16	14267000	0	0	0	141040	0	67051	34388	41150	144130	0	0	57339	75534	0	78931	0	0	98946	0	92701	120780	111950	45905	106850	173250	147740	82094	0	0	89573	155240	373560	0	402270	272790	250190	0	197810	143980	191440	224080	131910
ELNRPIVYSLSPGTK	frv2_111696	frv2_111696	yes	yes	2.3695e-09	128.82	14800000	0	0	0	53300	384790	72046	22988	11087	44440	0	37097	81248	132720	253910	147490	162670	0	165790	0	98581	120920	52868	35548	75638	188710	46324	29668	0	0	105920	246020	311070	0	163640	303890	223290	0	194710	168450	310250	82173	279160
FGIHVMR	frv2_111696	frv2_111696	yes	yes	0.10009	74.717	2594200	0	0	0	0	35423	6855.8	0	0	15961	0	0	7606.5	17150	27314	24410	19836	0	15970	0	27611	29864	20962	0	12350	28437	14250	12014	0	0	17539	55158	92716	0	0	0	0	0	20947	0	32657	34366	23126
GISTQAVNANTPILDTK	frv2_111696	frv2_111696	yes	yes	7.0175e-97	219.85	25478000	20920	39040	0	102710	0	97000	29121	28229	209120	0	63212	93860	126530	242690	164360	132700	0	232700	0	170530	204580	150450	65095	101520	274550	202060	110620	31154	37244	99658	266720	543410	93913	637310	421880	364100	0	241850	209540	372780	372890	239610
KVEGAYHDSLGFDVIDKWGR	frv2_111696	frv2_111696	yes	yes	6.6945e-05	96.455	2227500	0	0	0	0	0	0	0	0	0	0	0	26235	0	0	45730	0	0	0	158880	0	0	0	0	0	0	0	0	0	0	0	0	0	0	0	0	0	0	0	0	0	0	90635
SLYQQYAAWGVDFVK	frv2_111696	frv2_111696	yes	yes	1.6845e-48	199.33	17060000	0	0	0	0	0	141020	0	0	199140	0	43949	48668	77385	99383	122150	110120	0	156720	0	215720	202770	0	0	0	309700	0	63633	0	29094	0	345930	186500	0	594700	164430	378470	0	130790	192520	208090	244780	167140
DVGFLPISGLIGANLK	frv2_111698	frv2_111698	yes	yes	1.8283e-15	134.02	9838100	0	29089	45026	105920	312100	63933	14218	18434	61020	0	0	38503	67455	113810	46065	59749	0	45875	66945	149910	86114	0	0	77221	0	79618	47215	59366	25586	0	113500	130480	0	181160	0	118810	0	0	78133	95197	64231	75214
ESIVDVEGVVSIPAAPIK	frv2_111736	frv2_111736	yes	yes	1.075e-29	148.97	15292000	63494	0	61886	0	204400	93654	13389	0	128440	32244	82636	28430	70907	50031	57183	88530	0	93925	0	241560	160550	66697	0	79032	244180	126520	0	46799	0	0	171200	182820	0	419540	249770	177560	0	191330	195760	289550	0	116690
TPVDVNEWTRVEALDDSVANKPVK	frv2_111736	frv2_111736	yes	yes	7.0791e-13	110.38	6045700	0	0	0	0	0	34659	46300	0	0	0	71187	86465	130620	290760	87981	116350	0	123180	0	0	0	0	0	84092	221120	82019	0	0	0	0	99328	0	0	147230	0	0	0	0	129860	146420	0	86674
AAILQGVSEVADAVK	frv2_111738	frv2_111738	yes	yes	0.0079199	84.62	4460000	39246	0	0	148520	265050	0	0	24635	49818	36988	40488	35166	0	64171	0	0	0	37220	66512	75913	67820	57293	0	59822	0	58590	31125	42984	29065	30294	123830	0	0	76768	0	49934	71903	166700	0	0	104050	0
AALDDLAILTGGEVITEER	frv2_111738	frv2_111738	yes	yes	0.0027977	71.263	855220	0	0	0	0	0	0	0	0	0	0	0	0	0	0	0	0	0	0	0	0	0	0	8675.6	0	0	0	0	0	0	0	0	0	0	0	0	0	0	0	0	0	0	0
GYISPYFITDQK	frv2_111738	frv2_111738	yes	yes	0.03851	57.52	2467100	0	0	0	0	73368	0	0	0	15926	0	24867	16084	19889	97860	20334	20550	0	19065	0	0	0	0	0	0	0	0	0	0	0	0	0	0	0	153720	91225	0	0	0	54215	0	0	0
DDIEVLDEPLYANFLK	frv2_111740	frv2_111740	yes	yes	0.00066204	89.136	4997000	0	0	0	0	0	59627	14353	24062	47206	0	0	0	0	0	21237	0	0	19000	0	0	33135	0	0	34175	117590	117250	0	0	0	0	0	0	0	167990	0	47646	19520	98232	39402	0	59309	65353
GIVLVTASTR	frv2_111740	frv2_111740	yes	yes	0.022277	68.847	1085000	0	0	0	0	0	0	0	0	0	0	0	0	0	0	0	17830	0	0	0	0	0	0	0	15780	0	0	0	0	0	0	44138	0	0	0	0	0	0	0	41395	0	36885	0
IHHNNLLNNILAK	frv2_111740	frv2_111740	yes	yes	0.037473	51.286	264730	0	0	0	0	0	0	0	0	13770	0	0	0	0	0	0	0	0	0	0	0	0	0	0	0	34409	9624.6	0	0	0	0	0	0	0	0	0	0	0	0	0	52163	0	35277
ISLSEVHSADEVWTTGTMGELSPVVK	frv2_111740	frv2_111740	yes	yes	0.0025944	50.189	4839100	0	0	0	0	0	0	0	0	125430	0	0	0	0	0	0	0	0	53990	0	0	75650	0	0	0	0	0	0	0	0	0	0	0	0	0	0	144230	0	0	0	0	0	0
LLVWVGDEIVTR	frv2_111740	frv2_111740	yes	yes	0.0032801	89.301	5092600	0	0	0	0	0	61738	0	0	117890	0	22868	18347	0	0	0	31918	0	43757	0	0	44786	0	0	0	123470	60809	53637	0	0	0	0	0	0	137340	74237	70843	0	104140	0	0	0	0
VSVFDSITQGGDSVWEGLR	frv2_111740	frv2_111740	yes	yes	8.362e-20	138.28	7745200	0	0	0	0	0	93501	0	0	244770	0	0	0	0	0	0	0	0	0	0	0	0	0	0	0	330350	516750	0	0	0	0	0	155840	0	559960	70600	460970	0	0	0	0	0	0
MPDVAMTLAVVALFANGPTAIR	frv2_111748	frv2_111748	yes	yes	2.216e-05	86.189	567180	0	15631	18804	56155	72154	0	0	0	0	0	0	0	0	0	0	0	0	0	36240	0	0	0	0	0	0	0	0	13817	0	0	0	0	0	0	0	0	0	29570	0	0	0	0
QAVVEGSGGLFPTGR	frv2_111748	frv2_111748	yes	yes	3.7082e-05	109.48	5320200	0	38419	44577	78860	0	0	7618.2	0	27802	71017	50151	42729	66352	76757	31240	30757	0	30423	109590	0	39450	22142	0	0	26057	22839	0	82655	48917	47364	0	61931	0	75804	79446	0	123180	146280	76220	85978	87291	62055
VTWTENSVTVTGPPR	frv2_111748	frv2_111748	yes	yes	2.7152e-06	115.09	3476900	0	0	0	0	0	0	0	0	0	0	97920	0	0	0	0	0	0	17141	0	226820	146600	19485	0	0	0	0	0	0	89635	0	0	90348	0	127340	65789	0	312800	286570	0	0	0	0
IDALVAAWLPGTEGTGITDVIFGSHDFEGQLPVTWFR	frv2_111795	frv2_111795	yes	yes	0.018961	27.825	411730	0	0	0	0	0	0	0	0	0	0	0	0	0	0	0	0	0	0	0	0	0	0	0	0	0	0	0	0	0	0	0	0	0	0	0	0	0	0	0	0	0	0
GDNQWVDKIYQLMDEVDKYIPIPQR	frv2_111891	frv2_111891	yes	yes	4.632e-72	163.92	8466700	0	78923	137160	617020	1403400	0	0	0	0	115820	53928	0	0	0	0	0	0	0	1536400	0	0	0	0	0	0	0	0	199300	0	0	0	0	0	0	0	0	0	0	0	0	0	0
QTELPFLLAIEDVFSITGR	frv2_111891	frv2_111891	yes	yes	0	322.71	162440000	869950	2091600	2298600	6345500	8115800	131380	0	0	0	2644900	1420900	40304	73102	25327	0	112820	0	50943	13090000	2406600	1483200	24514	0	0	0	0	0	2776800	37544	25060	0	0	0	25413	11103	0	91047	2022500	170930	0	0	0
TTLTAALTMALASLGNSAPK	frv2_111891	frv2_111891	yes	yes	0	297.63	331470000	2362400	5473200	6002300	14735000	13347000	249370	6202.1	0	302240	2903500	1648400	1140200	1016800	1334600	953000	441430	3002.1	252630	10957000	2684000	1637000	12799	10215	44447	428500	29137	106470	4886600	977920	810870	538140	52094	54693	566570	0	225680	2610600	2012900	880930	714270	91346	252860
MFEFLHGSALDTPIINK	frv2_111909	frv2_111909	yes	yes	7.3407e-05	98.943	2978800	0	0	0	0	103010	19210	0	0	0	0	15930	20333	0	23585	23102	15923	0	0	0	218700	132050	0	0	0	115130	0	0	0	0	0	83537	0	0	142790	0	0	0	0	0	0	0	0
TAIGVLGDLADTLGGAAGPLIQQSVSSK	frv2_111909	frv2_111909	yes	yes	2.3407e-37	126.1	5400300	0	0	0	0	0	0	0	0	41044	0	0	0	41275	36259	30205	28865	0	20357	0	77021	162000	0	0	0	83404	36048	0	55639	14849	0	112280	39954	0	193480	0	48100	0	156920	59767	145790	0	0
TQLLMPYAPHVLQFLDSLYLEK	frv2_111909	frv2_111909	yes	yes	0.00032917	71.001	3767600	0	0	0	134800	217070	0	0	0	0	0	0	0	0	0	0	0	0	0	112010	0	110850	0	0	0	0	0	0	0	0	0	0	0	0	0	0	0	0	0	43927	0	0	0
SQSQSQPQPLTHDSNNNSTPSPATPPPASSK	frv2_111918	frv2_111918	yes	yes	0.00036285	51.052	2194800	25810	36402	33684	67744	70981	0	0	0	0	43072	27361	18010	23163	23371	12963	10738	0	0	93887	31607	19467	0	0	0	14134	0	0	75796	0	0	0	0	0	0	0	0	50132	50067	27878	0	0	0
FGTAPFFWNWGMEAMTK	frv2_111954	frv2_111954	yes	yes	7.6182e-24	142.94	2432700	0	0	44573	158960	196770	0	0	0	0	54635	0	0	0	0	0	0	0	0	272320	0	0	0	0	0	0	0	0	54928	0	0	0	0	0	0	0	0	0	0	0	0	0	0
RASQGTINFAMNR	frv2_111954	frv2_111954	yes	yes	0.036694	56.551	94545	0	0	0	0	0	0	0	0	0	10010	0	0	0	0	0	0	0	0	0	0	0	0	0	0	0	0	0	0	0	0	0	0	0	0	0	0	0	0	0	0	0	0
VLVLGGTGR	frv2_111954	frv2_111954	yes	yes	0.018549	74.376	674330	13946	23657	18150	51302	0	0	0	0	0	0	6383.5	0	0	0	0	0	0	0	0	11803	0	0	0	0	0	0	0	29140	9421.7	0	0	0	0	0	0	0	27059	0	0	0	0	0
ILDPTFLDGVTNTFR	frv2_111985	frv2_111985	yes	yes	8.9618e-11	128.71	7815400	0	0	66044	170950	475440	76101	0	14364	49067	0	51123	0	84202	149200	120240	118460	0	85013	0	0	146990	0	8203.7	0	152360	0	0	0	0	0	122400	137280	0	263060	83920	0	75035	0	116520	0	0	0
FHVMAQMSFAKGPLVFMGFSTAAKK	frv2_112013	frv2_112013	yes	yes	0.035814	52.72	104110000	0	182010	267770	571510	1059100	785240	42243	0	289040	110240	198960	322380	153090	441200	305970	571220	0	1343100	542450	2099300	3563200	0	0	539490	1194200	0	0	370920	0	0	2755700	141940	0	0	0	0	0	1206900	698430	2649000	429890	2141800
ILFDTEDGEISATNVK	frv2_112013	frv2_112013	yes	yes	0.02771	57.034	1946200	0	0	0	0	0	0	0	0	0	0	0	0	0	51535	0	0	0	0	677980	0	0	0	0	0	0	0	0	0	0	0	0	0	0	0	0	0	0	0	0	0	0	0
IYAMFTNTDESTFDPSIGAYSR	frv2_112013	frv2_112013	yes	yes	0.0011519	65.416	82956000	0	0	0	181730	273370	96744	0	0	100790	41921	318330	286770	333040	695870	287970	412470	10089	722190	0	154450	158530	70311	38557	161500	305670	169320	96779	155800	189090	0	1050600	982700	0	1613800	1130500	1634200	409470	3210100	3272500	5637400	4262500	5432400
DGWYPPGHGDVFPSLSNSGK	frv2_112029	frv2_112029	yes	yes	7.4303e-05	90.718	21011000	67669	76662	0	249300	297310	107640	0	0	180210	34531	0	26000	0	0	0	0	0	84334	269090	575970	372660	0	0	47079	201510	101580	69576	199860	0	53468	188650	259670	0	538710	582560	172110	0	263490	0	147210	243230	0
DGWYPPGHGDVFPSLSNSGKLDALLSQGK	frv2_112029	frv2_112029	yes	yes	0.011027	42.347	2614000	0	0	0	0	417740	0	0	0	0	0	0	0	0	72587	0	0	0	0	0	0	0	0	0	0	0	0	0	0	0	0	0	0	0	0	0	0	0	0	0	0	0	0
IQTPTDEVVVPYDTLAPTPAGSSEIK	frv2_112029	frv2_112029	yes	yes	1.3122e-59	155.31	203950000	638870	1002100	570750	1317000	1140700	1394700	490170	641540	1851100	402950	721790	631200	681450	1381700	271730	473300	7280.1	1029100	1551300	1856400	1432400	865350	537190	1307700	2507600	2061900	821600	729710	142790	430180	1774700	2714300	614780	3367700	1239100	1556900	555150	1603200	1126300	1706900	1781800	1688200
IQTPTDEVVVPYDTLAPTPAGSSEIKNLLDK	frv2_112029	frv2_112029	yes	yes	2.0207e-14	88.829	10638000	0	0	0	0	0	0	56777	0	0	213370	344240	333080	279250	419070	257790	298560	0	91697	0	0	0	0	0	0	0	0	0	0	0	0	0	0	0	0	0	0	0	0	184080	0	0	0
IVEKYQNSNIEIHTFNQSQYPR	frv2_112029	frv2_112029	yes	yes	3.5395e-07	97.621	4473700	0	0	0	0	0	0	0	0	0	27701	120340	57677	61392	273910	125110	153540	0	173800	0	0	0	0	0	0	0	0	0	0	0	0	0	0	0	0	0	0	0	0	40708	0	0	40809
LDALLSQGK	frv2_112029	frv2_112029	yes	yes	0.0018809	105.4	4350100	27029	41468	0	77018	0	17022	0	8424.3	0	0	0	0	9487	0	8071.8	0	0	13298	0	57277	0	0	0	0	0	45938	0	0	0	49467	0	93334	0	132230	0	0	0	0	30997	30521	60267	0
LIADDFLPLPSK	frv2_112029	frv2_112029	yes	yes	2.8605e-08	164.48	100700000	316360	534110	453640	1428000	2055800	464690	99526	129770	889930	113160	239420	174150	141490	173910	220430	152110	0	318970	811120	1071500	714860	459400	174340	223340	1317800	637470	327860	421340	179420	465130	740290	1040800	0	1337900	1287800	946360	271680	1021400	634240	935810	782670	680750
NGFINLVSR	frv2_112029	frv2_112029	yes	yes	0.00077013	126.39	22703000	59339	93804	105760	357890	489100	142950	47318	69419	142420	54144	98735	68743	57002	102830	61057	58391	0	64549	181960	325440	170150	0	84662	160090	256710	307540	120680	0	0	44629	180020	386800	0	425870	369480	174700	80098	204570	144660	189900	0	188840
SSVAGLEQISENEK	frv2_112029	frv2_112029	yes	yes	0.012899	67.102	809070	0	0	0	53074	0	14976	6129.2	0	32175	0	0	0	0	0	0	0	0	0	0	0	30109	0	0	0	0	29435	0	0	0	0	0	0	0	0	0	0	0	30322	0	0	0	0
SSVAGLEQISENEKNGFINLVSR	frv2_112029	frv2_112029	yes	yes	7.9354e-05	79.565	2658300	0	0	0	0	0	0	25193	0	0	0	0	0	0	0	0	160570	0	247320	0	0	0	0	0	104180	0	0	0	0	0	0	111770	0	0	0	0	168210	0	0	0	0	0	0
YGSSVPLLLMNSFNTHDDTQK	frv2_112029	frv2_112029	yes	yes	1.084e-55	162.92	138290000	324910	468340	507120	1710800	3496000	837220	198440	190470	1172900	304800	549820	458310	444460	552210	527770	511080	18748	581750	2311200	2414000	1236300	383180	137510	515270	2247400	1002300	503290	630280	283700	114180	1265900	0	366870	386960	321210	200150	390330	1247700	1166900	1528400	1106700	170950
YQNSNIEIHTFNQSQYPR	frv2_112029	frv2_112029	yes	yes	0	305.55	158900000	380830	81422	400560	1165100	2306600	809290	191250	286200	1126700	25639	542460	411000	353350	724630	424470	321710	0	635590	1649700	2052600	1522900	979540	258610	94411	2193100	1446400	605220	74214	348960	803040	1368600	2466600	0	2793000	2511600	1340600	471020	1567600	875570	1773500	1890700	1179700
MLSSWPITMIFPVIDIVR	frv2_112037	frv2_112037	yes	yes	0.00041268	87.088	592680	0	0	0	0	79704	0	0	0	0	0	0	0	0	0	0	5099.8	0	0	26825	0	0	0	0	0	0	0	0	0	0	0	0	0	0	0	0	0	0	0	0	0	0	0
EIMNSPAMQNLLNNPDIVR	frv2_112095	frv2_112095	yes	yes	0.00044897	84.66	9242300	0	0	0	0	0	0	25835	0	101670	0	0	0	0	141480	100330	86054	0	85206	0	0	101360	74381	0	0	178760	102180	0	0	0	0	159150	230140	0	220300	172290	119550	0	0	0	243480	179110	0
GFTPANTTGGTNTSGANTTTTNAR	frv2_112095	frv2_112095	yes	yes	0.0016633	59.07	1442400	0	0	0	0	36905	9666.4	4223.7	0	13439	0	7525.8	6777.5	9693.7	22083	12006	12357	0	12958	9677.3	14828	14938	14131	0	0	20948	13787	0	0	0	16086	0	33693	0	58668	45321	12502	0	19801	18907	32991	22227	25196
ILKDDQTLQSYGLEADHTVHLVR	frv2_112095	frv2_112095	yes	yes	0.01284	47.472	8432600	0	0	0	0	0	46172	0	0	68102	0	51421	30414	75124	247830	73072	100880	0	97629	0	70377	0	0	0	0	208450	0	0	0	0	0	0	126600	0	417480	0	60828	58290	109240	149530	329660	250610	201390
NQSTNPSTTSAEATSPVPNTNPLPNPWSSAATGGAQSNVR	frv2_112095	frv2_112095	yes	yes	0.10172	12.399	6354100	0	0	0	0	0	0	0	0	103680	0	86989	0	0	182360	0	72158	0	69419	0	246990	0	0	0	0	0	0	0	0	0	0	0	252980	0	0	0	0	0	0	0	0	0	0
NQSTNPSTTSAEATSPVPNTNPLPNPWSSAATGGAQSNVRR	frv2_112095	frv2_112095	yes	yes	0.0039307	33.063	1685200	0	0	0	0	0	0	0	0	0	0	0	50705	98660	148710	79114	73465	0	61820	0	0	0	0	0	0	0	0	0	0	0	0	0	0	0	0	0	0	0	0	0	0	0	0
VLQAQDDIVNSMK	frv2_112129	frv2_112129	yes	yes	0.00033486	104.7	1983300	0	0	0	0	0	0	0	0	0	0	0	0	0	0	0	0	0	0	0	0	0	34318	15205	0	66107	64203	29642	0	0	0	34821	65085	0	144420	122750	68432	0	0	0	0	0	28650
EIATLIETGSYSK	frv2_112153	frv2_112153	yes	yes	0.0099422	70.889	4461200	0	0	0	0	0	14562	30012	173270	24364	0	0	0	12671	0	19258	0	0	0	0	0	0	237520	124960	23123	56829	86898	12925	0	0	0	0	104640	0	0	0	0	0	48519	0	0	513250	60065
DLPLLINQWANVTR	frv2_112163	frv2_112163	yes	yes	3.3977e-13	142.91	6027300	66609	82687	83496	203420	316610	0	0	0	0	94599	0	46031	0	0	0	19260	0	0	245210	97620	55048	0	0	0	0	0	0	94966	0	0	0	0	0	0	0	0	87480	0	57379	0	0	0
SQDFNAWYLDIIAHAELADYGPVR	frv2_112163	frv2_112163	yes	yes	3.0919e-06	87.062	1517200	0	0	0	0	0	0	0	0	0	151630	0	0	0	0	0	0	0	0	408570	0	0	0	0	0	0	0	0	0	0	0	0	0	0	0	0	0	0	0	0	0	0	0
DYTGDYVTAENLYAVILGDK	frv2_112178	frv2_112178	yes	yes	0.0001441	88	1938200	0	0	0	0	0	34513	0	0	68635	0	0	0	0	0	0	0	0	39273	0	0	0	0	0	28926	160640	133540	0	0	0	0	0	0	0	0	0	74558	0	0	0	0	0	0
PGVIINHPQGPNVYDGVPK	frv2_112178	frv2_112178	yes	yes	0.024529	48.216	1822500	0	0	0	0	0	0	0	0	39252	0	0	0	0	0	0	0	0	9308.4	0	0	18642	0	0	16268	45934	59718	37971	0	0	0	0	76819	0	0	78296	79597	0	0	0	0	0	0
WAVLVAGSNGYGNYR	frv2_112178	frv2_112178	yes	yes	0.0013796	83.856	1377100	0	0	0	0	0	0	10063	13402	0	0	0	0	0	0	0	0	0	0	0	0	0	0	0	55759	70673	54515	49796	0	0	0	0	0	0	0	0	101260	0	0	0	0	0	0
MDVIDLEDETIDAEILNSMAVTNEHFQTALGTSNPSALR	frv2_112184	frv2_112184	yes	yes	0.029689	24.506	941090	0	0	0	0	0	0	0	0	0	0	0	0	0	0	0	0	0	0	0	0	0	0	0	0	0	0	0	0	0	0	0	0	0	89672	0	0	0	0	0	0	0	0
NAPSIIFIDELDSIAPK	frv2_112184	frv2_112184	yes	yes	9.6522e-83	210.57	85438000	166740	240600	180250	415080	814910	623840	119520	166490	530690	166430	426750	321140	386840	570540	416630	358030	0	424030	520740	914080	687170	228990	85168	271480	1180200	804230	240630	322540	238800	241570	859850	988070	841730	1676200	1057300	891220	435550	1469300	729150	1242300	1404200	1002300
ALAAFHLDGNK	frv2_112188	frv2_112188	yes	yes	0.015595	71.03	2249400	0	0	0	0	0	0	0	0	0	17559	0	0	0	0	0	0	0	0	0	0	0	0	0	0	0	0	86740	0	0	0	0	0	0	425100	269160	130500	0	0	0	0	0	0
ILDMAFITLNK	frv2_112188	frv2_112188	yes	yes	6.9699e-09	164.48	11211000	86026	119160	145970	363860	335820	23532	0	0	28963	102210	67729	45130	37232	0	23433	24129	0	0	406090	229710	91676	0	0	0	0	0	0	201140	57271	26594	69235	0	0	0	0	0	153140	196580	131770	0	0	0
IMGLDLSHGGHLSHGFMTPK	frv2_112188	frv2_112188	yes	yes	0.0022342	63.546	1407400	0	0	0	0	173080	0	0	0	0	0	0	0	0	0	0	0	0	0	212520	0	0	0	0	0	0	0	0	37060	0	0	0	0	0	0	0	0	0	0	0	0	0	0
LVSGGSDNHLVLVDLRPSGIDGAR	frv2_112188	frv2_112188	yes	yes	0.028976	42.639	15967000	111540	66474	97521	230090	843280	46806	0	0	0	141780	126930	72004	73994	0	38798	0	0	59912	891390	424530	169830	0	0	0	0	0	0	271520	124400	77413	103510	0	0	0	0	0	321150	384390	110970	0	0	0
TASIFRPK	frv2_112188	frv2_112188	yes	yes	0.022401	101.25	9639800	0	271230	293590	0	1903200	0	0	0	0	0	0	0	0	0	0	0	6714.4	0	0	0	560030	0	0	0	0	0	0	543990	0	0	0	0	0	0	0	0	0	890380	0	0	657150	0
VQDFLNFAISPEFPLKDK	frv2_112188	frv2_112188	yes	yes	0.00010507	105.91	18163000	153050	202840	166500	209440	887560	0	0	0	76634	256950	225600	77709	69762	44440	40160	0	0	0	1014700	165450	78196	0	0	0	0	0	0	334590	66631	0	0	0	0	0	63497	0	227560	341030	168170	0	0	0
VSATSVYFESMAYRLDESTGLIDYDMLEK	frv2_112188	frv2_112188	yes	yes	0.020968	37.526	1412800	0	0	0	0	0	0	0	0	0	84006	62820	0	33032	0	0	40095	0	0	0	0	0	0	0	0	0	0	0	0	0	0	0	0	0	0	0	0	0	0	0	0	0	0
WGVNVQPLSGSPANFAVYTAILKPHDR	frv2_112188	frv2_112188	yes	yes	1.6176e-16	107.57	12004000	75093	128380	108290	563360	1451400	0	0	0	0	201760	0	37872	0	0	0	34400	0	0	1094800	294720	160660	0	0	0	0	0	0	231110	0	0	0	0	0	0	0	0	0	0	0	0	0	0
ATDLNQGVVYGVK	frv2_112220	frv2_112220	yes	yes	0.0045557	80.312	2186700	28719	33601	29832	98314	71307	0	0	0	8641.8	20634	15890	10930	0	0	0	5582.6	0	0	129630	31489	0	0	0	0	0	0	0	53122	17937	17688	0	0	0	0	0	0	54702	0	20782	0	0	0
FDYDAIFGTALNR	frv2_112220	frv2_112220	yes	yes	4.637e-22	182.37	4239300	58331	86370	58147	0	0	0	0	0	58040	0	0	0	0	0	0	0	0	0	596450	213920	0	0	0	0	0	0	0	114720	0	0	0	0	0	0	0	0	91063	0	0	0	0	0
LFDHQLGLDSLTPISSIQDR	frv2_112220	frv2_112220	yes	yes	9.9001e-05	89.756	23026000	254040	353120	238800	593110	892200	58458	0	0	105840	192830	139900	60356	53894	0	37936	44943	0	53663	1242500	396130	357160	0	0	0	0	0	36312	316600	159010	0	0	91427	0	0	0	0	345770	339580	152450	0	140180	0
LGTMGEYGTPNIDIEEGYITITHNGR	frv2_112220	frv2_112220	yes	yes	9.5605e-11	94.456	11772000	174640	98176	0	252000	0	97299	0	0	0	188710	181830	67807	52472	0	81190	0	0	0	1289600	405620	226300	0	0	0	0	0	0	102110	125530	0	0	0	0	0	0	0	169930	0	136290	0	0	0
LVDLGLRPHFLSDSLIDSLLNFAVQYK	frv2_112220	frv2_112220	yes	yes	3.4884e-16	103.28	5560300	0	0	186490	897260	519190	0	0	0	0	61023	0	0	0	0	0	0	0	0	481670	0	0	0	0	0	0	0	0	0	0	0	0	0	0	0	0	0	0	0	0	0	0	0
QIMPGVSWR	frv2_112220	frv2_112220	yes	yes	0.013806	79.489	3554600	45305	75846	0	174110	152920	15333	0	0	0	46248	24399	18405	15688	21529	8144.4	0	0	0	189750	0	0	0	0	0	0	0	0	99857	35640	28473	0	41585	0	0	0	0	51533	0	28037	0	0	0
RLFDHQLGLDSLTPISSIQDR	frv2_112220	frv2_112220	yes	yes	3.1345e-05	90.442	4278500	47154	0	84981	295770	644900	0	0	0	0	0	0	0	21623	0	0	0	0	0	558030	0	0	0	0	0	0	0	0	96663	0	0	0	0	0	0	0	0	0	0	0	0	0	0
VFNQFTEQFK	frv2_112220	frv2_112220	yes	yes	1.409e-17	186.87	9638600	106520	112890	132400	420450	380070	16531	0	0	42253	97204	73687	54849	27231	19669	18381	0	0	10055	522320	168220	57558	0	0	0	0	0	0	176440	57580	68859	0	0	0	0	0	0	216610	140210	77253	0	0	0
VSELASIVTK	frv2_112220	frv2_112220	yes	yes	5.2062e-05	161.51	2801400	36783	49979	38371	98327	177340	0	0	0	7395.3	22071	18419	9830.1	9905.3	0	0	0	0	0	148500	60389	30053	0	0	0	0	0	0	49338	0	0	0	0	0	17614	0	0	0	0	23368	0	0	0
SPSLTSYEEALEALSSLIIR	frv2_112285	frv2_112285	yes	yes	1.5345e-06	103.9	3545400	0	23643	0	64875	112620	0	0	0	16371	13614	13750	0	11054	0	0	12802	0	9312.3	75810	82289	57650	0	0	0	31076	0	0	41244	0	16989	29558	0	0	90068	77171	0	0	57840	24969	32954	0	0
DLVLSHGALLPLLAQLNEHAK	frv2_112301	frv2_112301	yes	yes	5.9167e-07	97.776	8317900	0	0	0	129230	306670	61624	0	0	59792	0	0	34838	33049	0	48916	52973	0	54197	0	172010	134960	0	0	0	134390	0	0	87210	17428	0	132890	0	0	340110	0	53650	0	0	58626	92890	0	97087
EAAWAVSNATSGGSHEQLK	frv2_112301	frv2_112301	yes	yes	0.036356	50.722	1276000	0	0	0	0	0	0	0	0	14650	0	0	4014.3	6480.6	10448	11469	0	0	0	0	19565	14779	7179.3	0	0	22470	0	0	0	0	0	0	0	0	78097	44570	35415	0	0	8475	0	0	32047
LMNLLSNTYKK	frv2_112301	frv2_112301	yes	yes	0.047023	75.819	1878700	0	0	0	0	0	0	0	0	0	0	0	0	0	0	0	0	0	0	0	0	78109	31215	12427	11094	28024	0	8766.2	27892	13356	0	51979	61288	0	37996	28231	0	0	0	0	20338	0	0
LVELLQHPSPSVLIPALR	frv2_112301	frv2_112301	yes	yes	0.00026874	85.176	10657000	0	0	48650	122160	346750	39306	0	0	58048	29038	40320	38420	29790	44285	38764	39603	6974.3	47371	0	157670	112340	0	0	0	86231	0	0	0	0	0	81453	0	0	211250	159020	132300	50487	237080	130250	139440	130200	0
SPPIEEVIQAGVVPR	frv2_112301	frv2_112301	yes	yes	0.00072813	91.969	5709800	0	0	0	55857	227050	50688	9464.8	13620	48324	12414	0	31784	0	0	0	0	0	0	0	0	0	46457	0	32492	148180	75540	39038	0	27026	58418	0	0	0	197200	192670	0	0	0	0	0	0	0
VVIDSGAIPIFVK	frv2_112301	frv2_112301	yes	yes	0.014401	95.273	12797000	0	0	0	168370	284680	55961	0	0	67378	0	57694	55128	30164	71223	46304	43893	0	68156	0	177220	115680	0	14683	0	126510	0	0	0	57409	76021	119120	117630	0	256540	211460	179740	0	214060	103570	197840	182570	126480
AKESEMPDPSDLFTNVYVK	frv2_112323	frv2_112323	yes	yes	9.6638e-27	145.71	5377200	0	0	0	0	0	48828	27357	0	0	56907	57930	52191	75413	149390	51939	55903	0	66422	0	0	53812	0	0	0	100740	0	0	0	0	0	108050	0	0	161000	0	0	0	236210	155120	153150	0	0
ESEMPDPSDLFTNVYVK	frv2_112323	frv2_112323	yes	yes	1.4111e-47	182.57	44533000	143100	203020	124940	220030	636610	270000	64597	107870	237650	0	27559	0	175720	0	153580	0	0	0	392410	591930	338020	166980	80691	241130	370760	568200	112640	228670	170260	220890	480020	836810	413620	959260	732680	248970	208650	559050	345530	545780	676370	414860
GGSMHFYR	frv2_112323	frv2_112323	yes	yes	0.021948	83.206	949430	0	4665.5	3075.3	11281	17694	0	0	0	4748.6	0	3135.1	4167.8	0	0	4908.8	4146.8	0	3940.8	17080	18096	8800.5	6179.9	0	0	13996	0	0	11829	0	18562	12928	22969	0	29681	18392	8980.4	0	12875	7069.6	0	0	7551.3
GGTLFEIFSELMGR	frv2_112323	frv2_112323	yes	yes	2.3064e-73	214.61	28675000	64726	157010	241660	538900	894990	72889	0	0	67620	162050	284670	122080	148300	82801	146860	213130	0	138880	393570	270680	273240	0	0	0	112530	0	0	254230	24225	18576	147380	0	0	299580	0	98767	53771	620050	392560	388200	35202	141770
GLGVEAYGADRK	frv2_112323	frv2_112323	yes	yes	0.00059578	110.64	1733800	7303	10769	11203	34336	38316	5374.6	0	0	16667	7360.8	9162.5	10606	12689	22448	9633.6	6674.8	0	9831.3	0	20768	22164	0	0	0	0	0	0	0	0	0	0	0	0	68697	32802	21720	10780	34176	19314	25586	35226	0
KLVLAHDISTEK	frv2_112323	frv2_112323	yes	yes	7.7744e-05	137.62	4701300	10692	6998.9	16660	33568	130520	18759	0	0	21682	0	0	0	0	0	0	0	0	0	58493	64408	46452	0	0	31371	70415	51828	7275.5	36521	31483	64416	71887	123750	0	184980	150300	42480	40346	98123	55902	46491	97286	72235
KVGGFYGGHGIVGAQVPLGVGLAFGQK	frv2_112323	frv2_112323	yes	yes	0.00050402	57.227	2608700	0	0	0	0	0	0	0	0	0	0	0	33749	0	0	0	0	0	0	0	148750	161540	0	0	0	0	0	0	0	0	0	0	0	0	0	0	0	0	151870	0	0	0	0
LVLAHDISTEK	frv2_112323	frv2_112323	yes	yes	0.00037539	121.61	2299000	4571.3	12197	5286.2	29116	30053	7435.6	5547.3	0	16127	0	0	6094.8	0	7854.6	6069.9	0	0	0	19500	25813	21988	19189	15169	15320	26821	23749	0	18558	12672	0	32405	74243	0	87568	67354	33552	14584	25521	18790	31842	54800	22585
RGDYAPGLKVDGMDVLAVK	frv2_112323	frv2_112323	yes	yes	1.5691e-08	119.68	15332000	0	21288	62091	128010	925850	41681	0	0	39858	128490	0	122110	150580	260740	126630	120180	0	104760	174820	100770	78266	0	0	72689	181480	96152	0	57710	0	0	189620	89479	0	320960	151010	0	69335	221580	167400	239120	143510	214620
SVETSSSELMSFFNDMVLMR	frv2_112323	frv2_112323	yes	yes	1.1736e-82	199.41	58611000	149500	184520	183390	688250	1600600	296230	0	0	286050	356490	402320	125010	339990	307040	75761	372140	0	291540	843670	397290	610680	0	0	28722	709770	112300	45329	311460	95794	130370	681440	30823	0	1184800	330200	327060	18507	1115600	494290	464110	0	111950
VGGFYGGHGIVGAQVPLGVGLAFGQK	frv2_112323	frv2_112323	yes	yes	3.4259e-16	108.25	26127000	106510	198250	252790	585500	979380	98206	0	0	39408	198460	191910	86564	143440	133340	111220	138050	0	70712	670600	760590	439110	0	0	0	207830	0	0	429870	107660	0	435790	0	0	538730	0	245100	0	0	201590	0	0	118210
AMSMGETLVFMER	frv2_112335	frv2_112335	yes	yes	0.046506	60.301	98466000	0	0	0	0	0	0	0	0	0	0	0	0	0	0	0	0	0	0	148630	1042900	3660200	0	0	0	1213300	5393100	5310700	0	0	0	0	0	1356000	0	0	0	0	404520	337320	4429800	7597500	2261200
SQSQSNATIDPNSGFSSHSR	frv2_112335	frv2_112335	yes	yes	7.5181e-05	114.58	485050	0	0	0	0	0	0	0	0	0	0	0	0	0	0	0	0	0	0	0	54692	0	0	0	0	0	0	0	0	0	0	0	0	0	0	0	0	0	0	0	79206	0	0
VETSQSDTAAILFSSGTTGR	frv2_112335	frv2_112335	yes	yes	0.060782	37.285	5317000	0	45787	118330	138400	404350	0	0	0	0	0	108990	84810	169580	225700	70857	85237	0	53734	0	0	0	0	0	0	0	0	0	0	0	0	0	0	0	0	0	0	0	0	0	0	0	60407
NAQGLADVLTEMLSALNPK	frv2_112337	frv2_112337	yes	yes	0.010282	60.826	1413500	0	0	0	0	0	16093	0	0	17590	0	0	5927.1	21050	13060	10137	24193	0	26975	0	0	0	0	0	0	0	0	0	0	0	0	49386	0	0	20368	106000	0	0	0	31078	32213	0	0
INMEQAGFYR	frv2_112360	frv2_112360	yes	yes	0.019085	70.942	3496800	0	0	0	0	0	16667	8020.5	12344	47962	0	12145	0	12668	10651	16865	16004	0	29769	0	40334	0	26390	0	18579	51026	54418	21854	0	0	36024	62831	103560	0	106330	114190	86215	0	0	0	0	0	74006
LDGLAGSHPIEVEINHAR	frv2_112360	frv2_112360	yes	yes	0.00071462	76.158	4750700	0	0	0	0	93376	0	0	0	25413	0	15958	17368	13977	0	0	18219	0	23899	34488	73682	73775	0	0	22774	83955	27871	0	0	0	20165	94484	0	0	155460	118820	0	0	82406	52478	149040	108550	61207
VQNIAADAVPDLLNYFK	frv2_112360	frv2_112360	yes	yes	3.0595e-48	184.92	10057000	27753	0	0	0	0	81465	7159.2	0	91694	0	0	75288	0	84145	71653	0	0	101870	0	245430	0	0	0	0	148610	0	0	96991	35236	0	164300	0	0	291350	0	170320	56595	0	0	0	111670	120040
GWFSNSSDLNRPR	frv2_112430	frv2_112430	yes	yes	0.013888	84.605	201410	0	0	0	0	0	0	0	0	0	0	0	0	0	0	0	0	0	0	0	0	0	0	0	0	0	0	0	0	0	0	0	0	0	0	0	0	0	0	0	0	0	0
MSLSEFTGGGYASGGSAAAYPR	frv2_112430	frv2_112430	yes	yes	1.1236e-09	109.12	5015500	0	0	0	0	0	67604	0	53858	0	0	0	0	0	0	0	0	0	0	0	0	0	183630	107670	0	145990	96721	0	0	0	0	173170	0	0	293440	194280	56849	0	0	0	0	0	0
EIYLSYLNLEDDGAEALANALK	frv2_112564	frv2_112564	yes	yes	0.0002514	76.156	3228200	30597	0	0	0	241100	21527	0	0	0	0	74212	0	43555	32546	12622	30779	0	0	92726	67267	0	0	0	0	55088	0	0	0	0	0	59115	0	0	0	0	23294	0	191520	80474	0	0	0
EVDLSDFIAGRPEAEAIEVMNIFSSALEGSVLR	frv2_112564	frv2_112564	yes	yes	9.6082e-07	69.054	1746300	0	0	0	93118	134450	0	0	0	0	0	0	0	0	0	0	0	0	0	0	84398	0	0	0	0	0	0	0	53915	0	0	0	0	0	0	0	0	0	0	0	0	0	0
VVAEAVVQKPGFK	frv2_112564	frv2_112564	yes	yes	1.3844e-07	135.02	4278800	0	22224	15833	56393	120850	11404	6628.3	7557.6	9143.2	0	33482	16312	24171	44523	26432	17569	0	11981	0	66613	27517	29372	15103	26063	36031	32635	0	32055	13804	0	59066	80026	0	80602	67342	7815.9	26943	105800	48194	55077	63119	48130
EYVFVANSDNLGALVDLK	frv2_112607	frv2_112607	yes	yes	1.3855e-57	188.9	15913000	96445	86755	130620	0	0	236260	0	0	204330	0	0	0	103680	0	98664	0	0	169570	310350	422930	0	0	0	37565	405800	141370	0	106120	0	0	270140	0	0	331740	97770	200190	0	0	0	0	0	148880
ILNHLIQNK	frv2_112607	frv2_112607	yes	yes	7.2894e-05	162.25	1800300	3981.5	0	0	14964	0	6368	0	0	15951	0	0	0	0	0	3424.9	4295.1	0	0	27061	26866	22792	10656	0	0	19182	16634	5158.8	8882.4	0	16326	18779	56405	0	49041	37962	28477	0	20419	6536.4	14111	33629	9395.8
IVEKYTNSNVEIHTFNQSQYPR	frv2_112607	frv2_112607	yes	yes	0.031315	44.441	27373	0	0	0	0	0	0	0	0	0	0	0	0	0	0	0	0	0	0	0	0	0	0	0	0	0	0	0	0	0	0	0	0	0	0	0	0	0	0	0	0	0	0
LVVDDFLPLPSK	frv2_112607	frv2_112607	yes	yes	1.8547e-05	135.02	7355400	0	53743	0	0	275940	48773	0	0	72047	15464	0	30039	24009	29633	22461	0	0	0	0	0	98991	29692	15108	21869	176700	0	44402	49911	35370	37586	122470	143410	0	230160	239720	141140	38896	0	88890	0	125870	0
VQLLEIAQVPDEHVSEFK	frv2_112607	frv2_112607	yes	yes	4.7442e-05	97.291	19150000	0	0	0	0	428940	70724	33884	0	193650	0	142490	104440	30486	77410	28668	83955	0	137700	117540	241410	109390	36410	0	0	324860	263440	0	0	47039	0	163660	144160	0	340710	375340	248390	0	0	104680	178730	251990	293900
YTNSNVEIHTFNQSQYPR	frv2_112607	frv2_112607	yes	yes	8.7637e-34	159.54	15768000	0	0	0	33318	0	92835	0	9485.8	111000	0	0	12035	11450	0	0	10955	0	26252	115550	226160	221210	164500	25551	44499	325850	192680	82280	51907	0	136990	184350	372820	0	569190	334810	183320	0	38642	35509	61207	322630	162560
GRPSQLGYGDAGNMYAGVQGSGAR	frv2_112625	frv2_112625	yes	yes	6.7639e-07	92.098	2437700	0	0	0	104770	0	0	0	0	0	0	0	0	0	0	0	0	0	0	0	0	0	0	0	0	0	0	20323	0	0	0	0	0	0	195580	120820	94635	0	0	0	0	0	0
HPNITQGADTHDYSNSNLNR	frv2_112625	frv2_112625	yes	yes	0.005825	56.906	1779100	6573.7	0	0	14181	38226	0	0	0	10648	0	14267	9161.1	7233.3	10436	7346.8	7428.1	0	10487	24479	23715	19896	0	0	0	24825	20728	13520	18418	8961.4	0	0	18299	0	101820	74778	30963	0	0	17613	0	35963	33592
ALQNYYEGYNSNVHR	frv2_112637	frv2_112637	yes	yes	2.8217e-13	130.02	3399600	22035	26187	24163	78639	114530	0	0	0	10898	52083	25340	17842	22160	40341	12523	10572	0	10291	158570	79005	28021	0	0	11912	0	0	0	59762	26568	31310	0	0	0	0	0	0	44862	69541	0	26695	0	0
GIHFLSAK	frv2_112637	frv2_112637	yes	yes	0.031892	75.738	414370	0	0	6977.7	0	17570	0	0	0	0	9357.5	8536.1	4262.7	0	0	5042.5	2808	0	0	43521	12482	6623.2	0	0	0	0	0	0	17461	5615.9	0	0	0	0	0	0	0	0	13094	4789.1	0	0	0
LLSVPNIR	frv2_112637	frv2_112637	yes	yes	0.032729	75.109	911320	16673	19917	22378	50085	0	0	0	0	0	12721	10604	9404	0	0	0	0	0	0	73269	0	0	0	0	0	0	0	0	0	0	19333	0	0	0	0	0	0	0	0	0	0	0	0
LVYIDNAATSQKPTAVIK	frv2_112637	frv2_112637	yes	yes	2.0677e-23	140.75	9475600	53059	53112	32057	201350	378880	12646	7367.9	16094	38554	131480	81576	47615	42047	95549	31021	27912	0	22879	412290	124380	81840	34242	19472	30069	34346	36625	0	126050	57687	85028	49254	64804	0	81485	48409	23421	142450	156020	0	0	56545	36361
NATEAINLVAYSWGLSNLK	frv2_112637	frv2_112637	yes	yes	3.369e-37	150.63	9845900	94863	93109	136990	199080	404620	37021	0	0	0	164800	101960	46494	55902	60791	46572	32861	0	22549	425580	164320	0	0	0	0	0	0	0	112060	42747	0	0	0	0	0	0	0	85802	128260	0	0	0	0
SGDEIILTVAEHHSAIVPWQLVAQK	frv2_112637	frv2_112637	yes	yes	2.0101e-07	86.258	2012700	0	0	0	0	0	0	0	0	0	215300	117430	0	30634	0	0	0	0	0	0	0	0	0	0	0	0	0	0	165110	0	0	0	0	0	0	0	0	0	0	0	0	0	0
VATFINASDSR	frv2_112637	frv2_112637	yes	yes	0.016256	70.54	449870	0	22157	17495	41030	27985	0	0	0	0	16295	0	0	0	0	0	0	0	0	40990	0	0	0	0	0	0	0	0	0	0	0	0	0	0	0	0	0	15717	0	0	0	0	0
IAAAAGYSGVAFNQNVLR	frv2_112647	frv2_112647	yes	yes	1.8286e-57	187	9909500	109550	94408	140930	151360	239220	41529	12745	0	0	229340	156480	120890	58244	148190	66908	38485	0	0	367500	202620	107580	65670	27031	32780	0	0	21933	169760	105570	97172	118200	113880	0	0	0	45427	89111	0	58706	0	0	0
YIPAAPIFLPEGPWK	frv2_112647	frv2_112647	yes	yes	0.0010408	88.075	18775000	219740	294240	268610	684170	886090	82764	28545	39033	74245	293940	230790	135790	161070	224430	0	75652	7664.7	44023	697660	253050	136230	29382	0	0	133680	66393	0	364810	181970	0	0	0	0	0	0	0	233300	97585	80420	0	58173	0
SLSALGDVLSSLTSK	frv2_112659	frv2_112659	yes	yes	0.0026628	79.346	3669200	0	37137	0	0	0	0	0	0	43334	0	0	0	0	0	0	19625	0	0	0	105970	53595	0	0	0	49820	0	0	0	0	0	68717	0	0	63195	0	35033	0	0	0	0	44908	0
TRPLFEDEGHSVVDFPDDYTIR	frv2_112659	frv2_112659	yes	yes	4.3609e-10	110.4	4709800	0	0	0	0	0	0	0	0	65968	0	0	0	0	0	0	0	0	77563	0	0	0	0	0	0	134540	0	0	0	0	0	0	0	0	0	0	0	0	0	0	0	0	0
ALQAFHLDPQAWGVNVQPYSGSPANFAAYTAVLNPHDR	frv2_112671	frv2_112671	yes	yes	0.00012374	47.23	23440000	0	0	0	0	1408100	169630	0	0	149770	0	181020	0	69062	294730	0	139800	0	0	444090	0	0	0	0	0	402560	0	0	0	0	0	321000	0	0	402900	0	166570	0	317160	254590	0	0	218350
GEPLTVQLPGTQTR	frv2_112679	frv2_112679	yes	yes	0.069933	51.092	3582200	0	0	19772	0	0	24406	0	0	27366	38357	0	0	0	0	0	0	0	0	100480	0	42377	0	0	0	0	56167	0	0	23054	46829	0	73794	0	0	0	0	0	0	79047	0	0	0
ILLTSTSEVYGDPLVHPQPESYWGNVNPIGVR	frv2_112679	frv2_112679	yes	yes	8.9067e-07	65.836	18446000	0	0	0	0	0	91340	0	0	0	0	162250	0	118170	141380	98353	0	0	0	277940	364920	359350	0	0	0	326500	0	0	185160	58990	0	419220	0	0	681850	0	156370	0	0	0	268220	0	0
LMEGENTGPINIGNPGEFTMTELAENVK	frv2_112679	frv2_112679	yes	yes	2.4116e-28	119.2	12527000	0	0	0	0	0	99511	0	0	110200	0	76618	0	0	0	0	0	0	74682	0	222520	0	0	0	0	345360	210530	0	0	0	0	173050	152570	0	865430	0	0	0	0	164710	294290	108150	152740
DAAYQIINDELMLDGNPR	frv2_112683	frv2_112683	yes	yes	2.8014e-05	102.84	2257000	0	0	0	0	0	0	0	23209	0	0	0	0	0	0	0	0	0	0	0	0	0	139680	65250	190020	0	0	118740	0	0	0	0	493000	0	0	0	0	0	0	0	0	276220	0
FGWIVPAYSMPPDAQHITVLR	frv2_112683	frv2_112683	yes	yes	0.0020497	61.962	9433100	0	0	34164	0	0	28705	0	0	0	21247	43085	43333	46792	154220	29673	65543	0	151930	0	41695	190730	0	0	0	162310	0	53695	0	0	0	375930	0	0	0	0	0	0	128590	159410	0	0	162720
TASESDVSVHSTFASR	frv2_112683	frv2_112683	yes	yes	0.018315	61.265	202420	0	0	0	0	0	0	0	0	0	0	0	0	6480.7	0	0	4806.2	0	0	0	0	0	0	0	0	7631.6	0	0	0	0	0	0	0	0	15138	13250	0	0	0	0	0	0	19800
VLHELDAFAAR	frv2_112683	frv2_112683	yes	yes	0.012351	73.435	3249000	0	0	0	0	0	0	0	0	12249	12125	20633	19422	10789	22318	14810	12107	0	0	0	62837	48108	20784	11282	18172	39849	19979	9572.7	0	0	42016	104210	0	0	125230	92805	49461	0	74427	62513	113670	58748	94814
EGEIYLASPYTAAASALTGYVTDPR	frv2_112715	frv2_112715	yes	yes	1.0627e-23	120.42	17701000	100350	107230	107530	439220	399530	49529	0	0	0	253330	159640	113560	114330	149080	76754	62188	0	37499	599760	232550	105350	0	0	0	66292	0	0	153050	103350	0	0	0	0	0	0	0	354230	139010	108590	0	0	97670
LVIIPDHYIFTSDER	frv2_112715	frv2_112715	yes	yes	6.6298e-05	104.95	17110000	104670	101660	130160	375380	786460	42160	0	0	28184	146690	225740	90728	44056	78915	32216	49443	0	52740	627930	386040	116260	34234	0	32994	0	45197	0	237130	113130	60368	0	0	0	0	0	0	350950	359640	133470	142180	81856	117980
VPTFLVPATQK	frv2_112715	frv2_112715	yes	yes	0.000502	101.71	6937600	0	0	0	0	347300	0	0	16874	0	153450	88851	64387	49720	88531	37113	25627	0	22623	0	0	0	64876	20067	0	0	41108	0	560010	94202	104080	0	165780	0	0	0	0	292850	350070	0	0	96817	0
VWMDVYSLPVPGSGGK	frv2_112715	frv2_112715	yes	yes	1.7258e-10	126.77	19587000	136940	176360	168660	428700	402310	57892	0	23773	50569	193710	155110	63580	64105	106080	0	41009	0	40177	573200	225600	136850	0	0	69448	107430	0	0	245820	106790	71326	152110	0	0	183570	103210	0	256920	252680	195760	0	127240	0
FTDISFLR	frv2_112760	frv2_112760	yes	yes	0.00079807	128.12	1545100	34303	55403	54693	160630	0	0	0	0	0	0	14263	0	0	0	0	0	0	0	140900	0	0	0	0	0	0	0	0	0	0	0	0	0	0	0	0	0	36920	0	0	0	0	0
AYHEQLSVPEITNAVFEPASMMAK	frv2_112806	frv2_112806	yes	yes	1.2457e-30	137.23	171000000	205550	210050	201370	778170	2536200	904060	89566	61051	698860	264430	532000	474090	579310	1048500	900920	711350	0	605220	698730	2378100	1900700	0	0	614800	1586700	824290	246220	474370	204600	402130	1802700	1836900	1081200	2972400	2427600	1006100	274960	1444800	1176100	2004100	1416600	1281900
FFQQQLDHFSFK	frv2_112849	frv2_112849	yes	yes	4.6081e-08	162.93	6364000	0	0	0	0	0	0	0	0	153780	0	0	0	0	0	0	0	0	73432	0	0	0	0	0	0	0	55217	0	0	0	0	53440	107520	0	371480	206310	293920	0	0	25490	0	68686	0
FFQQQLDHFSFKK	frv2_112849	frv2_112849	yes	yes	0.00056168	99.539	2618500	0	0	0	0	0	14912	0	0	31113	0	0	12922	23503	22973	17531	35678	0	62114	0	0	0	0	0	0	35834	0	0	0	0	0	49584	0	0	97289	55706	117870	0	0	0	0	0	0
LIQGWINDYYQESQAVYEVK	frv2_112849	frv2_112849	yes	yes	0.036967	47.904	41985000	451640	772450	1008500	2827200	4303100	104590	0	0	106590	393740	208680	104260	47206	109290	59492	102270	0	41559	1531200	0	70851	0	0	0	34062	0	0	179160	0	0	0	0	0	0	0	0	101310	138540	83937	78467	0	28181
LYGLPMR	frv2_112859	frv2_112859	yes	yes	0.0036733	107.55	10220000	59119	125490	108300	269470	271280	13423	0	0	15133	97705	77792	42605	29335	42883	22352	13662	0	14696	325580	152140	71454	32018	0	0	16549	0	0	138780	56439	73506	0	59977	0	66493	0	20659	131830	126830	44842	0	36933	0
QDISSFEGSDVYDQADAAGFIR	frv2_112859	frv2_112859	yes	yes	1.8533e-73	181.23	28744000	185360	283000	174790	563130	0	79612	26976	0	75619	239870	159690	151010	117980	86820	86077	80841	0	56578	552300	331340	146190	86955	46785	63872	0	103150	0	258910	201800	109830	0	0	0	285630	183040	89742	467340	505090	270470	178750	0	0
LGLSVTDAVIDALSK	frv2_11295	frv2_11295	yes	yes	6.6641e-106	200.63	16417000	0	99377	82200	418610	663500	47727	0	0	0	0	0	0	0	0	0	26846	0	27679	0	205160	123930	0	0	0	0	0	0	0	0	0	0	0	0	82256	0	30465	0	273830	233800	316870	0	0
SASFLTTFTK	frv2_11295	frv2_11295	yes	yes	3.0214e-05	163.84	9133100	25368	0	49078	137170	342020	47837	0	0	0	0	0	23753	0	0	21814	81866	0	15592	0	63130	0	0	9678.9	14981	0	0	0	0	0	38337	0	57877	0	0	39172	0	0	139590	86978	93084	124300	105600
TFASSVVVNK	frv2_11295	frv2_11295	yes	yes	0.010173	79.201	1982800	0	0	7981.7	39899	0	7740.2	0	0	0	0	0	0	0	0	0	0	0	0	0	19064	18243	6424.1	0	0	0	0	0	0	0	13347	19147	0	0	33389	0	0	0	46397	20108	0	31060	0
TFASSVVVNKDSVFPR	frv2_11295	frv2_11295	yes	yes	0.0052737	75.143	1709400	0	0	0	0	78785	0	0	0	0	0	23812	0	0	0	0	29806	0	0	0	0	0	0	0	0	0	0	0	0	0	0	0	0	0	0	0	0	0	0	104780	49701	0	60840
MPNLDPLAYTLPLLGISIGGK	frv2_112954	frv2_112954	yes	yes	1.3733e-08	102.43	750050	0	0	0	0	0	0	0	0	0	0	14410	0	48163	36386	23119	99980	0	27823	0	0	0	0	0	0	0	0	0	0	0	0	34859	0	0	115260	0	0	0	0	26502	32684	0	0
AIGLPIDVDSIYNLFPLFKPPGL	frv2_112966	frv2_112966	yes	yes	1.169e-08	100.02	9814400	38788	195470	279200	543650	143380	0	0	0	0	84715	82865	0	0	0	0	0	0	0	559600	146820	0	0	0	0	0	0	0	57539	0	0	0	0	0	0	0	0	0	146830	0	0	0	0
WEYSTRPVYGWGDVGSTQK	frv2_112966	frv2_112966	yes	yes	2.1144e-08	113.14	14331000	147840	127490	120510	295340	0	0	12356	0	31536	260600	203560	100320	0	85689	66390	0	0	31899	582780	0	103450	0	0	0	0	0	0	263080	116840	0	103380	104450	0	189150	0	63218	269200	280790	0	0	110210	0
SYVLSISR	frv2_11297	frv2_11297	yes	yes	0.021001	83.948	1131900	0	0	0	0	0	9253.6	0	0	0	0	0	0	0	0	10170	0	0	0	0	0	16508	0	0	0	13463	0	0	0	0	0	28995	0	0	0	0	0	0	0	0	0	0	0
TFASGILVPK	frv2_11297	frv2_11297	yes	yes	0.00061994	110.39	6681300	15792	36216	0	129460	194020	40955	5932.6	7693.1	16069	0	0	0	0	0	0	0	0	0	0	0	39894	0	0	0	0	0	0	0	0	26914	50661	0	0	0	0	0	0	150570	94457	76827	77309	67325
VEDILPIVAPQTPGLWLNIQHDAFYTQHK	frv2_11297	frv2_11297	yes	yes	0.043078	31.964	3564000	0	0	0	0	0	59122	0	0	0	0	0	0	0	0	0	0	0	0	0	0	0	0	0	0	0	0	0	0	0	0	0	0	0	0	0	0	0	0	0	0	0	0
VSYISSPEVGFLR	frv2_11297	frv2_11297	yes	yes	2.3832e-08	135.02	12199000	34701	83766	111830	0	608590	109900	20610	30673	44534	0	0	0	0	0	66586	63568	0	63061	0	0	0	34273	26907	48832	0	0	0	0	0	85761	0	123250	0	0	0	0	0	0	229580	0	0	0
AAESKENLPTLHNNPYSWSK	frv2_112972	frv2_112972	yes	yes	0.037271	46.461	632520	0	0	0	0	0	0	0	0	0	0	10949	0	18025	65168	16283	38924	0	28476	0	0	0	0	0	0	0	0	0	0	0	0	0	0	0	0	0	0	0	0	0	0	0	0
ENLPTLHNNPYSWSK	frv2_112972	frv2_112972	yes	yes	2.0023e-29	181.75	12692000	12269	15347	0	97656	186670	40627	12134	0	88270	0	27555	28964	41221	104240	66082	78303	0	125310	0	105980	113950	56562	13850	47406	158570	78053	48444	0	0	83950	125830	200060	0	382900	241900	193130	0	122800	93223	133340	179150	90348
FLSHHYSGYVSIDGNAETGK	frv2_112972	frv2_112972	yes	yes	0.0081062	54.764	1531000	0	0	0	0	19358	8942.4	0	0	13000	0	0	0	19839	39286	22320	22348	0	15109	0	24036	22917	0	0	0	40997	0	0	0	0	0	0	74934	0	0	0	0	0	0	0	0	0	0
NLFYYFVSSER	frv2_112972	frv2_112972	yes	yes	1.1614e-38	196.67	22212000	0	0	30358	88889	468340	105660	22588	19763	195980	0	52225	69991	0	140980	169180	135390	12502	207920	0	164440	231750	0	0	52101	379430	138770	169240	0	0	0	355680	241660	0	347940	141910	304440	0	198720	233080	236040	230350	306220
SLITHLPGFSGK	frv2_112972	frv2_112972	yes	yes	0.0032022	85.672	7679700	0	14876	0	49299	0	0	0	0	24264	0	0	12332	28365	27662	0	10209	0	25691	0	38182	24255	0	0	0	0	0	0	0	0	0	0	0	0	62275	0	20685	0	0	0	37522	0	0
VSNVIYLDSPTGVGFSYSK	frv2_112972	frv2_112972	yes	yes	1.1636e-144	235.21	45022000	85564	0	60474	190970	739850	249890	34488	39041	348220	0	80891	164190	183770	253310	242710	241440	8615.4	343270	0	414140	483440	176720	50113	130700	558110	268280	256760	0	37779	106820	576740	640990	0	984300	699500	590190	58859	407910	366800	628930	449280	329060
AVLEYLAAEVLELAGNAAR	frv2_1130	frv2_1130	yes	yes	2.0746e-96	210.67	154780000	952100	1760800	1015000	5181500	5781200	168790	0	0	388700	96247	642370	55114	138360	44783	30486	183400	0	177120	404040	625510	237190	0	0	0	146310	0	95566	397300	8001.7	43784	94660	0	0	144610	18400	160600	82842	10635000	1461000	397950	10504	62319
GQQSLVTWATPK	frv2_113035	frv2_113035	yes	yes	0.091424	38.238	3722600	72817	71557	68339	206410	190580	0	0	0	0	0	45829	0	22133	0	0	0	0	0	0	0	0	0	0	0	0	0	0	0	0	0	0	0	0	0	0	0	0	0	0	25987	0	38888
AFGILKK	frv2_113057	frv2_113057	yes	yes	0.047464	97.64	436660	0	0	0	0	19184	0	0	0	0	5580.4	7504.6	12566	13354	16725	8858	11614	0	0	6217.3	7414.4	0	0	0	0	0	0	0	0	0	0	0	0	0	0	0	0	0	16805	8848.2	14324	0	0
AVMQAAQEVADGKLNDHFPLVVWQTGSGTQSNMNANEVIANR	frv2_113057	frv2_113057	yes	yes	0.0015573	35.221	13535000	0	0	0	0	0	0	0	0	72091	142760	0	107510	294960	412830	0	342290	0	174560	0	0	0	0	0	0	0	0	0	0	0	0	552290	0	0	0	143360	148830	0	0	0	513810	0	0
DTFGPIQVPSDKLWGAQTQR	frv2_113057	frv2_113057	yes	yes	0.00031241	81.807	32468000	78193	0	179800	0	677270	143430	41260	59884	152450	183920	206370	259110	298740	413140	210150	216910	4150.5	247020	491610	550230	325930	152220	61780	336870	812650	268350	0	282750	147220	73666	653350	750710	0	966080	509700	397330	320350	787150	434590	616990	557950	449040
LNDHFPLVVWQTGSGTQSNMNANEVIANR	frv2_113057	frv2_113057	yes	yes	2.8979e-37	120.72	44655000	0	0	0	0	0	243760	0	0	318480	0	0	68607	0	129660	106130	106990	0	115930	0	910800	0	0	0	150350	628690	348370	127480	271030	156700	0	905480	815520	0	885480	621410	451620	273020	783910	412420	934050	1749500	532340
VNMEYGLDPTIGK	frv2_113057	frv2_113057	yes	yes	0.00047166	101.75	8574300	27356	56051	32852	119700	0	52632	16707	0	44449	35362	32477	32662	38034	49585	36767	36072	0	0	0	95529	54446	0	0	53787	56699	0	29843	68258	44787	82646	90785	177300	0	239870	180630	96093	51890	139410	82907	98344	157800	112170
DAAGDQLSHVSAMNLLKDWYLNSDIAK	frv2_113073	frv2_113073	yes	yes	5.8214e-06	73.994	2564800	0	0	0	0	0	0	0	0	0	0	0	0	0	0	0	118570	0	175650	0	0	0	0	0	0	0	0	0	0	0	0	0	0	0	178650	0	0	0	0	0	324560	0	211040
DLFEGILQAGSTIVENLR	frv2_113073	frv2_113073	yes	yes	8.3908e-17	134.4	2098500	0	0	0	29805	0	0	0	0	0	16043	27845	0	9069.3	0	0	22299	0	10526	40569	42881	59895	0	0	0	16792	0	0	34789	3187.9	0	14770	0	0	49938	0	14289	0	160530	27480	19137	0	0
LLLQLTNIGDSALDLQALPQGLASLLSK	frv2_113073	frv2_113073	yes	yes	0.02328	55.158	0	0	0	0	0	0	0	0	0	0	0	0	0	0	0	0	0	0	0	0	0	0	0	0	0	0	0	0	0	0	0	0	0	0	0	0	0	0	0	0	0	0	0
RLDQQLITLK	frv2_113073	frv2_113073	yes	yes	0.017631	92.866	2988600	0	0	0	0	0	0	0	0	10393	0	0	12255	11489	0	10561	19403	0	23298	0	34217	13490	0	0	7137.4	39243	29704	7580.3	12507	12049	39183	46376	91866	0	97282	86489	62453	19220	107760	79570	97513	131050	102460
TAQAILDFNREEIPLFILANWR	frv2_113073	frv2_113073	yes	yes	4.0412e-12	111.77	1080100	0	0	0	0	196470	0	0	0	0	24346	0	0	0	0	0	15623	0	0	0	0	0	0	0	0	0	0	0	0	0	0	0	0	0	0	0	0	0	204180	0	0	0	0
VVPQAGQVWFPDSATK	frv2_113073	frv2_113073	yes	yes	0.006316	69.805	7929600	0	0	0	0	0	0	0	0	41019	28829	38757	39070	44486	47599	44591	43369	0	82343	0	76721	0	0	18767	0	67738	70625	0	58969	0	82808	77484	201570	0	191080	180400	159660	75396	250560	162850	200160	203510	161140
DLSNLVKPEDIINSEHLTTLLAVVSK	frv2_113075	frv2_113075	yes	yes	8.5316e-87	167.87	54372000	46445	108090	95958	355090	1415700	192630	0	0	337460	142920	348560	219030	296260	422170	361030	489440	9023.9	506460	479700	347440	753660	0	0	0	813240	0	0	183230	89492	293830	633830	0	0	1317800	446410	252750	59495	735800	543940	760880	0	352600
DWLASYETLTSYVVPR	frv2_113075	frv2_113075	yes	yes	3.0241e-21	151.8	19365000	0	40387	0	74822	276600	128270	0	0	228700	17926	74256	54654	59582	79855	78868	83524	0	151790	115000	272700	246760	26803	0	0	269730	131430	80540	0	0	91263	280340	100610	0	469300	222080	296420	0	286080	182530	209620	28254	0
EIVDGIHAQVAK	frv2_113075	frv2_113075	yes	yes	0.00047709	118.77	496620	0	0	0	0	0	0	0	0	0	0	6609	0	0	0	6400.5	6462.2	0	0	0	0	0	0	0	0	0	0	0	0	9374	22024	0	0	0	0	0	0	0	0	0	0	0	0
FNIPNLR	frv2_113075	frv2_113075	yes	yes	0.057554	69.383	6767400	0	30752	29404	82776	126210	38743	13315	19014	45332	0	34524	35593	40126	0	31786	0	0	0	54659	80989	0	54764	0	32764	93699	50983	0	37804	17122	0	0	0	0	0	0	0	0	84865	0	0	106010	0
FVWDDAKYPTMSPLK	frv2_113075	frv2_113075	yes	yes	2.5391e-09	128.74	14508000	0	0	73657	58604	0	0	0	0	210980	0	32551	76384	75775	177070	44141	112420	0	227990	0	0	0	29272	0	0	188290	145650	78066	0	0	0	111080	198330	0	380300	79480	259110	0	141880	247150	287120	0	220280
HSFDTPLYR	frv2_113075	frv2_113075	yes	yes	0.0052273	91.265	10547000	19467	21304	0	83199	118030	24073	12574	0	41821	0	19733	20630	33789	39665	28582	33875	0	35310	113320	78262	172980	38383	24026	38368	106060	49729	67421	42902	27268	69298	116940	157960	0	369800	281680	140190	25616	77127	65212	70055	96935	61765
LFSESILR	frv2_113075	frv2_113075	yes	yes	0.0028878	105.14	4047500	0	21225	0	0	111370	0	0	0	43326	0	0	0	15349	0	22499	0	0	0	0	0	52066	34136	0	0	0	0	19671	0	16147	52972	0	0	0	0	140950	64727	20301	72652	57727	0	52856	53496
SILEGLSDSSNSAYWK	frv2_113075	frv2_113075	yes	yes	3.3124e-301	294.97	52630000	74315	94277	84546	254740	527860	285200	62785	94255	582160	47635	125960	120090	138130	200690	149960	135800	0	210440	339670	457580	400660	124650	75562	176180	629790	506010	0	208880	102430	187460	386340	671570	198410	1093600	836190	568850	138280	403540	313260	472760	474880	340910
SNAFMEGVSHK	frv2_113075	frv2_113075	yes	yes	0.041007	78.705	1145600	0	10243	0	0	36625	7020.6	0	0	15799	0	0	3901.5	5503	8720.8	5845	5876.3	0	9159.6	6620.9	11090	11968	7767	0	0	13193	17964	9319	0	6295.9	17208	0	23090	0	0	0	0	0	13106	12247	15999	19238	12257
VGTLDSLLSLSDDLNK	frv2_113075	frv2_113075	yes	yes	6.4008e-179	260.29	102790000	197170	264440	261910	590440	1653500	521110	144880	122760	1052800	147470	314350	271740	384440	412550	346070	378980	0	515460	514670	910050	716480	162480	71825	368070	1123000	779800	479610	325150	212630	119370	1048300	1236000	424660	1824600	1241200	1190500	222430	1014100	884570	1117800	919130	1014200
VSGVNTAALTVDGVPVDSYLTR	frv2_113075	frv2_113075	yes	yes	2.7168e-98	203.58	76046000	124710	136990	187160	214860	888310	369160	108340	149480	888600	86141	241760	204800	321430	293870	178970	330150	0	418410	310250	582800	604310	286750	144260	265590	934640	698200	411310	180380	167640	113290	655540	1092400	0	1428100	1110600	1033400	210270	862310	784530	1155700	1133800	715890
YSQKDWLASYETLTSYVVPR	frv2_113075	frv2_113075	yes	yes	0.0017757	68.41	3592300	0	0	0	0	0	0	0	0	0	46713	75634	72142	97439	138880	64838	124540	0	87799	0	0	0	0	0	0	0	0	0	0	0	0	0	0	0	0	0	0	0	0	0	0	0	0
YWVVSLPVQNNSSSSTIWNQLQQNISK	frv2_113075	frv2_113075	yes	yes	5.1005e-39	137.86	105460000	203020	285170	284250	981010	2336700	720850	0	0	609350	235700	635850	458450	611080	888260	708650	764790	0	668120	0	966100	1419900	0	0	137990	1551200	0	80576	385950	193550	178010	1372200	209290	0	2475300	634400	1397800	116950	1079700	584110	858030	0	237080
IVAPLVATLPLEIK	frv2_113077	frv2_113077	yes	yes	2.2837e-13	145	9201300	0	0	0	82508	173960	37314	0	0	44685	0	41733	21053	17029	0	0	21150	0	0	79492	115140	50619	0	0	23478	44092	24960	0	59084	30843	0	0	80696	0	228760	151080	106510	78893	296180	137250	119450	135570	101140
MHIYVR	frv2_113077	frv2_113077	yes	yes	0.065616	72.338	650370	0	3419.9	0	6089.3	0	0	0	0	0	0	0	5403	4072.1	0	0	6561.1	0	11343	0	8967.3	9892.2	0	0	0	15529	7408.2	0	7630.8	0	0	0	0	0	0	0	0	6558.1	14329	6282.1	8053.5	12982	6104.7
SAQVTESTDFTQLQDKEPWLSSSK	frv2_113077	frv2_113077	yes	yes	3.8597e-13	108.25	46199000	0	145090	157240	245320	0	206730	85493	0	231970	165510	298740	279350	441480	0	354960	0	0	480750	161090	386760	269670	0	213440	233350	718510	546880	0	0	151710	145800	545420	685460	0	1527400	1223900	503440	292450	958170	627240	811310	950950	662160
SGLVALNLDLAQVASFVK	frv2_113077	frv2_113077	yes	yes	7.9214e-30	151.28	6321200	0	53208	0	0	235900	0	0	0	0	30176	66927	20551	49117	0	39898	77755	0	35343	0	88362	80082	0	0	0	59118	0	0	38294	0	0	83734	0	0	221640	0	39048	0	0	129580	0	0	0
TVFVPTGVSLTSK	frv2_113077	frv2_113077	yes	yes	0.0009215	93.649	16464000	0	84872	0	0	183960	61780	22063	0	37400	48001	87602	53279	74623	83105	66156	93186	0	57929	123070	175010	116760	0	33578	0	104120	60963	0	0	58488	78336	163590	236700	0	375280	275070	130590	96236	1599100	286300	260720	0	187750
VMSATESFIHGLDEK	frv2_113077	frv2_113077	yes	yes	2.1794e-15	155.37	4824200	0	0	0	0	0	39713	0	0	0	0	0	17196	17543	0	0	29774	0	51242	0	73530	92082	0	0	0	0	0	0	0	0	0	152280	0	0	290620	0	62324	0	164020	123530	188140	0	123360
WGNIEFPLPFGR	frv2_113077	frv2_113077	yes	yes	9.3173e-07	131.79	12363000	0	43352	51670	158650	331080	0	0	0	48682	42659	55608	46845	53475	0	58348	56536	5173.8	76752	0	117330	119290	0	0	21920	116430	38207	0	78584	19813	0	99941	91635	0	233290	53044	129330	81816	343150	174360	273900	133440	117610
ALSGQKDEAYFYSNASALASR	frv2_113081	frv2_113081	yes	yes	6.4284e-17	126.26	7363900	0	43667	49858	0	302660	72999	0	31151	0	0	94680	63331	77448	0	48250	55473	0	31693	0	0	0	0	17415	135890	93456	64683	0	68310	36480	47151	0	182480	0	222680	192720	76245	60145	124590	96311	0	0	102590
SAPLIALANYIAYR	frv2_113098	frv2_113098	yes	yes	0.0017955	113.52	4473500	27869	54451	69468	126650	0	0	0	0	0	0	42561	18199	27123	0	12487	0	0	0	200030	36001	0	0	0	0	0	0	0	0	0	0	0	0	0	0	0	0	37991	0	0	0	0	0
VYGEDVAVLAGDALLAFAFEHIAVSTSGVSPAR	frv2_113098	frv2_113098	yes	yes	6.6513e-07	68.211	3852700	0	0	55617	175220	154920	0	0	0	0	67782	44194	0	0	0	0	0	0	0	462750	59941	56447	0	0	0	0	0	0	64171	0	0	0	0	0	0	0	0	0	0	0	0	0	0
YIGLLFQVVDDILDVTK	frv2_113098	frv2_113098	yes	yes	1.4496e-47	182.49	1700200	0	0	21850	36739	0	0	0	0	0	0	6977.2	0	0	0	0	0	0	0	199750	22743	14526	0	0	0	0	0	0	16087	0	0	0	0	0	0	0	0	0	0	0	0	0	0
LAMVLFDIPDIR	frv2_113104	frv2_113104	yes	yes	2.1267e-05	130.56	6094400	55744	32169	62460	84342	204330	0	0	0	0	58429	46989	30112	28323	29387	22217	22494	0	0	314620	141230	64274	0	0	0	0	0	0	99582	34253	0	0	0	0	76761	0	0	55269	122200	42531	86617	0	0
NAIYEYFDTNYSNK	frv2_113104	frv2_113104	yes	yes	0.029356	59.884	2091500	0	0	0	0	0	0	0	0	0	68827	49806	0	0	0	25677	0	0	0	0	106620	141470	0	0	0	0	0	0	0	0	49086	0	0	0	0	0	0	136860	0	0	0	0	0
QDVVRDDPTNNVPDNIFSK	frv2_113104	frv2_113104	yes	yes	0.011939	58.635	5893100	75947	128040	74904	129510	223980	16357	13691	0	0	68228	0	36073	37500	59452	28853	11877	0	0	254030	61190	43526	24181	0	29493	0	0	0	63278	45713	49154	60126	0	0	0	0	0	94226	0	38683	0	0	0
SYNDTYYIDPQTVLR	frv2_113104	frv2_113104	yes	yes	0.013891	64.537	4554600	49933	0	0	229170	229480	0	0	0	0	65760	0	40717	49229	0	39245	22674	0	0	353930	0	0	59569	0	0	54706	0	0	0	0	64749	0	0	0	0	75062	0	0	0	0	0	0	0
AIEHIVLFK	frv2_113132	frv2_113132	yes	yes	1.8437e-16	185.72	28468000	103730	188070	180850	404450	1047100	88579	22444	59532	141770	188020	130040	99178	83976	147050	80474	72804	0	87846	907300	391740	241560	106360	33539	97582	230310	180700	73237	489240	110970	156540	212930	266340	0	257000	246230	169430	285160	359650	122540	164150	199710	153800
DRVESVVVVDYVVPPPPPPQSASL	frv2_113132	frv2_113132	yes	yes	0.0063641	51.31	9462600	122850	0	0	0	0	126870	28292	29361	0	135220	137510	48580	139240	252120	89263	80831	0	56035	0	211460	0	0	0	99110	0	87010	0	0	101530	0	0	165650	0	247310	202960	0	0	270760	133470	0	118880	0
GYSVASLAVFPGEK	frv2_113132	frv2_113132	yes	yes	9.2313e-09	123.95	7254700	184940	139920	84640	0	0	0	31733	80812	175420	0	0	0	0	0	0	0	0	0	603020	387350	127550	179010	64489	0	202800	194710	74399	279970	120330	161770	0	339980	0	0	382840	129280	191980	0	0	0	0	0
SKEDLETYSAHPSHLGVVR	frv2_113132	frv2_113132	yes	yes	2.5122e-08	111.73	18441000	59277	89519	65164	157090	696740	23282	0	0	37500	224690	130260	53130	99518	256940	75439	66042	0	64085	806550	248870	136920	0	0	0	131480	0	0	252480	68961	75410	0	121410	0	0	283450	0	312920	384550	176370	218060	247520	129500
VASMVNGLSSLVSLDQVLHLTAGPILR	frv2_113132	frv2_113132	yes	yes	2.4878e-38	132.66	22255000	0	0	0	0	0	0	0	0	0	0	0	0	0	0	0	0	0	0	0	0	0	0	0	0	0	0	0	0	0	0	0	0	0	0	0	0	0	477580	99735	0	0	0
FQSNEIYISGDSYSGITVPIIVQEIAQANEK	frv2_113148	frv2_113148	yes	yes	0.024769	33.487	952330	0	0	0	0	0	0	0	0	0	0	0	0	0	0	0	0	0	0	0	0	0	0	0	0	0	0	0	0	0	0	0	0	0	0	0	0	0	0	0	0	0	0
LFEYWANDDNVRK	frv2_113148	frv2_113148	yes	yes	0.0026932	99.669	1113600	0	0	0	0	0	0	0	0	0	0	0	0	0	0	0	0	0	0	0	0	0	0	0	0	0	0	0	0	0	0	0	0	0	0	0	0	0	0	0	0	0	73277
SDSIQAHQAYQFFR	frv2_113148	frv2_113148	yes	yes	1.2193e-12	132.06	8424100	0	0	0	0	98578	70458	12670	32763	105240	0	0	0	24253	58101	52046	64963	0	114940	0	34152	93020	88527	18798	47847	257410	225160	81746	0	0	0	24104	244330	0	367490	422320	282300	0	0	0	0	0	0
SDSIQAHQAYQFFRK	frv2_113148	frv2_113148	yes	yes	0.028996	58.098	777310	0	0	0	0	0	0	0	0	0	0	0	6666.6	0	25618	14151	21115	0	28381	0	0	0	0	0	0	42155	0	15216	0	0	0	0	0	0	31231	0	28854	0	0	0	0	0	0
VSSIIFVDLPVSTGFTYATTDSGSQR	frv2_113148	frv2_113148	yes	yes	1.5616e-15	103.75	5799200	0	0	0	0	0	70065	0	0	0	0	0	0	43478	0	0	79072	0	70244	0	0	0	0	0	42620	321150	393700	255120	0	0	0	0	0	0	0	0	124310	0	0	0	0	0	0
RIPSIIDAWFNASENMAIFSSSEGMLFPAK	frv2_113153	frv2_113153	yes	yes	0.0022394	47.854	223190	0	0	0	0	0	0	0	0	0	0	0	0	0	0	0	0	0	0	0	0	0	0	0	0	0	0	81598	0	0	0	0	0	0	0	0	0	0	0	0	0	0	0
AILVEGLK	frv2_113162	frv2_113162	yes	yes	0.039605	71.877	538150	0	0	0	0	0	0	0	0	15783	0	0	0	0	0	0	0	0	0	0	0	0	12175	0	0	0	17802	0	0	0	0	0	0	0	28630	35095	0	0	0	0	0	26537	0
APDSYYTELKR	frv2_113162	frv2_113162	yes	yes	0.033034	80.737	1480200	11027	0	0	38634	59219	0	0	0	12850	20096	0	0	11261	9899	0	7797.7	0	14304	39960	0	31490	0	0	0	25684	23115	0	0	0	0	0	0	0	49383	47830	30167	14315	0	24151	0	0	35124
EVGVVAIPTSVFYLNPEEGK	frv2_113162	frv2_113162	yes	yes	1.4914e-45	166.21	107890000	346220	364910	425640	838230	1941000	689050	159990	140590	816420	445770	631500	406900	602000	763020	530200	453050	0	724990	0	1556500	1267100	127790	45188	301880	1473600	830180	535880	459540	269590	157150	979160	899660	0	1517100	1022700	886850	521040	1400100	780000	977930	877210	939380
EVGVVAIPTSVFYLNPEEGKNLVR	frv2_113162	frv2_113162	yes	yes	0.013971	45.844	2185600	0	0	0	0	0	0	0	0	0	0	0	91859	109520	152310	41288	141660	0	58510	0	0	0	0	0	0	0	0	0	0	0	0	0	0	0	0	0	0	0	0	0	0	0	0
GITLRPPDFALPIEELK	frv2_113162	frv2_113162	yes	yes	1.3439e-10	123.29	32384000	243920	221930	260150	651180	1139100	197730	0	27606	259350	74559	266600	48216	54206	45982	117230	152310	0	156870	165180	429260	342720	0	0	0	466800	151830	0	314720	0	0	396410	79029	0	435040	303650	303290	0	423550	313570	136140	270720	208390
GYGVPDLNIAIAER	frv2_113162	frv2_113162	yes	yes	0.00061844	97.223	44325000	137050	197420	219870	498440	939550	273390	78939	112180	486340	177600	225740	182870	274070	346390	233620	221110	3709	0	654370	670000	331530	256260	90010	149260	489570	411000	152180	146930	110630	168900	423980	541110	0	626460	620470	369790	145880	473560	310590	420890	471770	326730
HGAINLGQGFPNFDGPDFVK	frv2_113162	frv2_113162	yes	yes	1.7309e-39	157.62	69758000	0	163900	127100	923180	1908800	425200	44096	36060	476100	384400	414990	325880	306700	488770	91549	130500	0	136790	1496800	1016600	753340	0	0	249320	999530	529410	345910	220320	0	0	720000	641160	0	991350	780970	813280	0	235840	0	440630	736000	730160
IGWAIAPPHLTWGVR	frv2_113162	frv2_113162	yes	yes	0.00035164	92.856	14622000	32306	45709	148380	600610	883110	35027	0	0	43557	31223	0	0	51848	32683	29974	102790	9287.1	42806	193220	390090	239370	0	0	0	195890	0	0	0	0	0	0	0	0	0	0	103230	0	172060	0	0	0	36181
LAFDLEHISIASLPGMFER	frv2_113162	frv2_113162	yes	yes	0.0023809	70.907	6801000	28434	35504	0	0	0	27061	0	0	117410	0	0	22691	0	0	0	14727	0	25302	131210	147040	193220	0	0	0	0	0	0	155240	0	0	0	0	0	120220	0	32957	0	0	0	90176	0	0
QAHAYLTFATSNPMQR	frv2_113162	frv2_113162	yes	yes	1.4644e-19	140.68	11443000	19442	21539	14403	49913	158890	65526	0	0	55440	55874	53407	49116	55233	122250	43918	59128	3155.2	48394	217660	223300	159280	42068	0	0	152540	30845	59881	89863	49452	102600	147340	267760	0	236720	188430	52205	0	223490	0	56776	0	0
RAILVEGLK	frv2_113162	frv2_113162	yes	yes	0.069223	78.098	10329000	26921	37779	40611	147730	306770	41004	22281	12426	49779	55656	82203	51324	57572	83268	57936	44289	0	33664	155980	105830	77843	32370	24818	58156	90418	75814	38731	54816	36920	15673	111290	112500	0	0	0	0	54314	147810	80591	43206	48878	105420
TTIFTQMSMLAIK	frv2_113162	frv2_113162	yes	yes	1.021e-10	157.5	15734000	91106	91518	61246	288230	536470	101470	24217	14780	115940	0	0	50290	52815	90320	62449	83798	8695.4	55376	231200	262900	168290	41853	20220	95319	195720	99424	73540	147970	54863	0	213050	134580	0	189590	151930	114100	0	0	66765	0	57501	0
AQLVNYIQYR	frv2_113168	frv2_113168	yes	yes	0.033198	63.426	1076000	0	0	0	0	0	0	3114.4	0	22169	0	0	0	0	0	0	6795.8	0	22152	0	0	0	0	0	0	25342	27256	28371	0	0	0	0	0	0	0	27866	48430	0	0	0	0	0	0
ATMPSEGWQIPVFK	frv2_113168	frv2_113168	yes	yes	0.0046476	76.728	3025200	0	0	0	0	0	38225	8724.5	0	96184	0	0	0	0	0	0	18981	0	78226	0	0	0	22088	0	0	57672	100080	66414	0	0	0	0	82496	0	112100	140670	193150	0	0	0	0	0	0
VHDQIQLYGSTVK	frv2_113168	frv2_113168	yes	yes	0.014576	66.215	493840	0	0	0	0	0	3230.7	0	0	13065	0	0	0	0	0	0	0	0	0	0	0	0	0	0	0	15831	24890	10309	0	0	0	0	0	0	26838	25591	27234	0	0	0	0	21817	0
IPTHNQTLSTNQNLLLAK	frv2_113199	frv2_113199	yes	yes	4.02e-05	98.408	13758000	24106	47838	33182	117150	82787	40755	16563	25096	54289	27947	75979	53734	67085	160040	70162	62153	0	33987	76662	141310	79353	130470	60355	90632	179120	106020	22291	55916	32093	52146	178580	360410	0	286070	317770	106940	41408	157430	92416	119490	228010	72344
ATELALIGILFNK	frv2_113205	frv2_113205	yes	yes	1.7768e-05	115.57	1356400	0	0	0	0	0	0	0	0	32256	0	0	0	0	0	0	0	0	0	0	40871	40773	0	0	0	0	0	0	0	0	0	33056	0	0	71558	0	0	0	0	0	0	0	0
FANLIDENIEELAALDAIDAGK	frv2_113205	frv2_113205	yes	yes	4.4329e-33	145.81	14007000	26366	0	0	0	164740	65839	0	0	97127	43755	98028	59033	140360	144680	70559	85462	0	106210	154090	113800	115440	0	0	36578	258440	143750	0	60528	52507	0	172440	73014	129780	511010	169850	155090	0	220510	155320	139630	0	132590
ILSYIEHGKR	frv2_113205	frv2_113205	yes	yes	0.0043376	114.89	723450	0	0	0	9746	17988	0	0	0	0	7405.8	9301	7375.3	7934.8	0	0	8375.9	0	0	15454	20737	11291	0	0	0	20019	7582.6	0	11629	0	6467.3	0	0	0	0	0	0	0	0	0	11960	14558	0
LFINGDFVESVSGK	frv2_113205	frv2_113205	yes	yes	0.0090347	70.889	6254800	30475	74452	0	202120	206580	0	0	0	0	39965	48115	0	0	0	64917	0	0	0	0	102170	0	0	19434	0	0	0	0	55825	32496	0	294050	242580	0	0	0	0	0	193780	109740	0	0	0
EISESVPVIALIFGGGAELPLTGHNTLLELEK	frv2_113258	frv2_113258	yes	yes	2.6188e-10	77.907	3404400	0	0	0	0	285630	0	0	0	0	0	0	0	17632	0	0	62596	0	0	0	0	102040	0	0	0	0	0	0	0	0	0	0	0	0	58683	0	0	0	0	29085	0	0	0
VPTIIDSGTVITR	frv2_113258	frv2_113258	yes	yes	9.6759e-05	109.95	3367800	0	15389	0	60666	164000	21848	0	0	0	0	0	0	12322	0	13643	13302	0	0	0	60584	68865	0	0	0	0	0	0	0	0	0	42290	0	0	60403	0	0	0	0	0	0	0	0
IITTNVWSAELSK	frv2_113263	frv2_113263	yes	yes	1.7515e-11	158.31	8283600	0	0	0	122940	0	57161	12775	0	73449	0	0	0	31492	66873	43867	35546	0	46521	0	0	0	91958	37353	63532	137270	129050	0	0	0	0	123960	190850	0	280590	232400	99127	0	0	78454	130800	0	116110
LLKSKASDDLLNGLSDFK	frv2_113318	frv2_113318	yes	yes	0.010817	92.236	5514900	0	0	0	0	0	90575	0	0	0	0	0	0	0	0	0	0	0	0	0	0	0	0	19097	0	0	0	0	0	0	0	0	0	0	0	0	0	0	0	0	201070	0	0
VGYGTYLPPAEEAAIAGVK	frv2_113344	frv2_113344	yes	yes	0.00046244	84.375	68580000	101030	0	138950	352120	810960	329780	103500	184530	533160	141000	322960	194290	203890	241570	185170	187280	0	212950	400260	688700	0	276410	0	244790	1240200	655180	136610	0	108790	209940	488890	748670	0	1234800	1057400	580790	194460	864950	591340	647070	1000700	760250
VGYGTYLPPAEEAAIAGVKR	frv2_113344	frv2_113344	yes	yes	0.0023483	66.022	11552000	0	46151	47989	98792	0	0	30078	0	43064	79084	75179	119890	113330	141340	82955	184870	0	137040	0	127160	74827	0	0	0	0	0	38108	57491	0	0	0	0	0	0	0	0	82643	162730	203720	470650	0	265170
AVHPIALGK	frv2_113361	frv2_113361	yes	yes	0.017285	75.738	1604000	9632.2	8731.4	10381	40228	31900	0	0	0	4545.6	20590	13964	9710.8	10709	13457	8878.6	6344.5	0	5194.4	61740	23246	18079	9887.9	3563.4	8235.8	12736	0	0	33137	16554	19080	0	36108	0	0	22286	0	31611	41024	20241	12831	16291	11899
GASLEYFTTHTDLVKR	frv2_113361	frv2_113361	yes	yes	0.07132	47.227	3292000	26309	0	25686	71204	0	0	0	0	0	62633	49662	39802	60444	154560	29108	24995	0	20435	105480	0	0	0	0	0	0	0	0	43437	0	0	42509	42569	0	0	0	0	78104	134970	59625	81565	0	0
GEIIGWQNIELISDRPLETMLK	frv2_113361	frv2_113361	yes	yes	0.0043199	56.906	14796000	221490	155830	0	393870	0	78413	0	0	63972	248870	151220	0	85199	104440	0	0	0	0	966590	0	0	0	0	0	0	0	0	560600	0	0	0	0	0	0	0	0	0	525820	0	0	0	0
ILIASIMEEYNK	frv2_113361	frv2_113361	yes	yes	4.7283e-06	148.78	9397600	118840	104590	97657	223650	0	0	0	0	34123	160620	0	0	0	0	0	0	0	0	301900	0	88552	0	0	0	102670	0	0	168220	127710	0	94054	150070	0	249220	0	0	0	0	0	0	101450	136830
MPNPFVIGSGPPGTNYTVMK	frv2_113361	frv2_113361	yes	yes	3.7954e-60	183.21	28243000	142070	143820	139030	593570	819810	0	14547	28437	54936	273340	153070	87425	93476	104530	99147	0	0	0	771940	167630	126350	89544	45102	68234	163590	0	0	342140	176920	0	166710	323580	0	283260	130390	0	388750	383020	164290	164220	199820	125000
MTPNITDISQPAR	frv2_113361	frv2_113361	yes	yes	0.0017542	88.282	1888100	44410	0	33784	96238	113700	0	0	0	0	54450	42372	0	23773	0	0	0	0	0	0	0	0	0	0	0	0	0	0	87363	0	42796	0	0	0	0	0	0	0	100470	0	48182	0	0
VINVTPR	frv2_113361	frv2_113361	yes	yes	0.038412	77.923	546220	7831.6	10263	8260.9	16415	0	0	0	0	0	11082	7752.3	6425.4	0	0	0	0	0	0	23241	0	0	0	0	0	0	0	0	22836	9786.5	10123	6183.7	14330	0	9091.2	0	0	22338	0	8815.9	0	7664.1	0
LVHNAHQFLR	frv2_113396	frv2_113396	yes	yes	0.00069637	112.71	7618600	0	0	0	28640	59409	6890.6	0	0	50742	0	9191.5	11624	15727	46412	21561	32690	0	70513	0	14560	22004	0	0	14353	58702	34554	36607	0	0	25427	71141	124680	0	257110	127140	174140	0	19238	22000	55167	67524	48103
QWYSNGQVAGYTR	frv2_113396	frv2_113396	yes	yes	5.7963e-09	146.77	7725200	0	0	0	0	0	31171	4492.7	8031.1	168820	0	0	12393	15725	30656	20210	26115	0	171940	0	38809	25994	0	0	0	149420	95977	133930	0	0	30395	43780	80125	0	245300	193260	349940	0	41172	51895	107540	0	73139
SYEIPFNHGMAMISNELYESLLK	frv2_113396	frv2_113396	yes	yes	1.1827e-30	138.77	46621000	47156	0	53857	182420	935820	454290	0	0	1737900	0	119440	97575	238090	467600	356320	518430	0	1943700	185560	113560	480030	0	0	0	1261300	125650	0	81346	0	0	501750	0	0	1652800	684470	2219600	0	0	0	0	0	0
SYGYILGSYWANDDNVR	frv2_113396	frv2_113396	yes	yes	7.0477e-130	236.75	30186000	0	0	0	0	0	0	41696	80251	735590	0	49414	55647	104230	102460	104490	116890	0	613480	0	109430	134600	66858	39259	113880	700940	581640	831570	0	0	0	152390	195890	0	597540	357180	1237100	0	0	210040	0	276320	268290
VSSIIFLDLPVGTGFSYPNTQK	frv2_113396	frv2_113396	yes	yes	3.2863e-85	194.08	57371000	0	0	176560	288390	927080	248220	14155	0	844280	0	74198	95284	153750	340450	159950	328220	0	697700	0	188520	355910	30234	0	0	711620	406230	579630	0	0	136070	378900	0	0	974550	606590	1646000	0	341390	266450	667270	28875	333100
ILLAAGDTFR	frv2_113406	frv2_113406	yes	yes	0.0039427	92.538	901940	16841	34671	43085	87075	0	0	0	4464.2	0	7315.4	0	0	0	0	0	0	0	0	0	0	0	0	0	0	0	0	0	34513	0	16273	0	0	0	0	0	0	50307	0	0	0	0	0
VVAGAPNEILLVLDGTTGLNMLPQAR	frv2_113406	frv2_113406	yes	yes	2.2866e-22	111.81	10562000	85309	116450	164630	410040	548010	0	0	0	24512	103050	0	13481	18849	41738	13032	20661	0	0	520780	0	59655	0	0	0	0	0	0	146120	34253	0	0	0	0	0	0	0	51296	215910	0	0	0	0
SLEDAAAPLVAFLQNPAAVQELR	frv2_113427	frv2_113427	yes	yes	0.00027982	69.255	4610100	0	0	0	0	161960	25227	0	0	59589	0	26925	0	83622	28610	19877	32271	0	33356	66067	0	69526	0	0	0	49761	0	0	0	0	0	0	0	0	181490	0	78543	0	0	0	85788	0	41338
IIVFSGSPVK	frv2_113491	frv2_113491	yes	yes	0.019892	70.412	1297300	0	0	0	80074	0	0	0	0	0	0	0	0	0	0	0	0	0	0	0	52191	0	17889	0	0	0	0	0	0	0	23057	0	82735	0	0	0	0	0	0	0	0	0	0
IIVFSGSPVKYEK	frv2_113491	frv2_113491	yes	yes	0.036443	74.987	4739100	0	0	0	0	212920	13682	7097	0	0	39257	50500	36664	51237	69250	28587	19407	0	0	0	80363	0	24991	13005	0	0	0	0	57318	0	0	99738	90541	0	97426	59567	41015	0	61001	0	0	0	0
TQSNPENTVGVLTMAGK	frv2_113491	frv2_113491	yes	yes	3.3261e-11	128.45	9407700	25548	33656	0	87877	0	49454	22743	18880	47600	40146	61009	35625	57048	90276	41145	38286	0	42347	93229	143750	106830	117310	42882	57228	159000	139980	42016	92153	0	57412	92142	195270	0	231300	0	0	49056	132880	56271	89208	0	140130
AIGFIDTMIDYSFTNAPIQK	frv2_113499	frv2_113499	yes	yes	2.744e-96	206.63	40342000	246490	309190	361600	921960	1355700	129860	0	0	125850	278160	210980	73809	163450	170110	122830	100070	0	90004	1193600	129370	356290	0	0	0	134710	0	0	555950	129380	0	171420	0	0	132130	0	0	265930	928890	84350	235980	0	99864
AIALAVGDWYFDR	frv2_113507	frv2_113507	yes	yes	0.01614	93.766	4041900	0	0	0	0	0	0	0	12901	0	0	0	0	39522	55531	53378	51894	0	49094	0	0	94285	0	0	53255	119700	0	0	0	0	0	107040	0	0	0	0	0	0	96725	51563	80117	0	0
AIPFTGIMSNNAQQNPDFFNWNR	frv2_113507	frv2_113507	yes	yes	7.6679e-05	76.329	3274700	0	0	0	0	0	0	0	0	0	0	0	0	55629	0	67650	100170	0	0	0	0	92528	0	0	0	171590	0	0	0	0	0	0	0	0	203220	0	0	0	0	0	0	95303	0
YPTGHFLANPQGGLGLQFAQLGR	frv2_113539	frv2_113539	yes	yes	6.367e-64	164.56	27737000	66948	89008	108550	404930	698950	124950	43315	0	94935	63537	104920	105610	0	175530	103250	149100	9741.2	82554	284380	250600	309960	0	0	132740	385530	243590	84028	0	66183	0	274260	303420	0	680860	232800	301970	153850	279350	145670	198330	431690	126660
AFEALNTHLAHNTYLVGDSVTLADIITTSNMLLGFSK	frv2_113609	frv2_113609	yes	yes	3.7078e-05	55.407	8865500	26057	73043	77436	467730	1631600	25646	0	0	0	95298	53334	0	0	0	0	14313	0	0	508350	0	288580	0	0	0	0	0	0	164600	0	0	0	0	0	0	0	0	0	0	0	0	0	0
AKNPLDLLPPSK	frv2_113609	frv2_113609	yes	yes	0.00090206	110.25	5777400	128830	132330	90049	383200	195080	0	10420	10132	38377	0	0	28298	26704	35602	17339	26026	0	31838	0	0	0	19928	10206	32131	129310	103900	29119	0	0	0	57150	75548	0	132610	158980	71315	0	95987	70581	129250	112820	78229
IPVLETPEGAVFESNAIAR	frv2_113609	frv2_113609	yes	yes	1.3681e-126	227.41	72691000	244160	361120	419630	784080	1791800	536880	155260	233680	879210	288140	531320	363890	359610	321790	360040	355980	0	578110	1196600	1237000	937670	292880	126680	300710	1099900	755210	323140	365430	269600	303490	1042200	1013400	0	2056900	1389400	1248100	0	0	0	0	0	0
LGENNLFGSSPIDQAHVDQWIDFSSLEIDANLLK	frv2_113609	frv2_113609	yes	yes	4.7303e-43	116.57	37942000	0	121630	236000	634320	2280400	37361	0	0	0	196950	767930	0	0	0	0	38593	0	22567	1554600	1080600	982280	0	0	0	68612	0	0	374660	0	0	0	0	0	100510	0	0	0	1000700	0	0	0	0
LGHAPFIPLVEESAFSSLK	frv2_113609	frv2_113609	yes	yes	3.7981e-13	125.41	16393000	0	78340	0	0	0	130390	13310	0	104620	63450	191440	0	0	0	0	0	0	0	288100	297350	261510	0	0	0	212270	99329	0	117710	63063	0	0	0	0	291690	209830	155590	0	343300	316440	149370	144370	206100
LGHAPFIPLVEESAFSSLKR	frv2_113609	frv2_113609	yes	yes	1.1411e-06	105.5	23018000	0	103800	124970	390970	1106600	50993	0	0	145470	23915	24978	105400	71307	78805	51023	121130	0	147000	530400	614550	373620	0	0	0	199840	0	0	263720	55997	0	132810	0	0	249460	78377	237820	72263	567120	211410	584690	183430	185880
LNPIGKIPVLETPEGAVFESNAIAR	frv2_113609	frv2_113609	yes	yes	2.1941e-07	88.555	3133000	0	0	0	0	0	0	0	0	0	79854	113660	71799	114100	114140	0	194360	0	142760	0	0	0	0	0	0	0	0	0	0	0	0	0	0	0	0	0	0	0	0	0	0	0	0
MILDEWKR	frv2_113609	frv2_113609	yes	yes	0.013814	89.142	10426000	0	20228	0	26920	261580	44681	31876	32277	102410	0	35512	27645	45417	75474	39775	46995	0	73117	54559	100960	46341	70712	31828	69251	206400	194550	27046	27370	0	70859	149950	155620	0	261140	240890	165830	29082	121350	102420	184240	135390	159050
MLVIGSAAPFK	frv2_113609	frv2_113609	yes	yes	0.00018608	150.1	26499000	43028	86655	117670	357480	763510	117330	25535	67044	93319	107500	142150	130440	117150	152960	88438	76088	0	49549	235320	386680	179910	137170	58481	93737	207820	136310	72751	116530	61140	200120	239890	483250	0	413120	408900	114030	68326	176460	107960	95864	260220	57287
QTEALPPIPSAQKPK	frv2_113609	frv2_113609	yes	yes	0.00080046	103.6	5869600	0	0	0	0	156110	30950	12185	0	56637	20336	29082	0	0	0	0	0	0	0	74896	93218	54396	19908	18854	25993	95667	0	25505	33218	26690	43245	69479	0	0	178500	172490	0	35460	132740	85313	127760	168880	109260
SFTSEFPHVER	frv2_113609	frv2_113609	yes	yes	1.854e-20	155.33	736950	0	0	0	0	0	0	0	17575	0	0	27844	0	0	0	0	0	0	0	106900	0	0	0	0	0	0	0	0	0	22631	0	0	0	0	128400	79205	77398	0	0	0	0	0	0
TLIAAEYVGVK	frv2_113609	frv2_113609	yes	yes	0.00039352	113.69	8523300	25305	35889	17820	46582	121590	31927	0	15130	66401	9739.4	13553	14017	0	0	11399	0	0	15722	68971	109060	69050	20118	22704	24789	71174	83292	35451	28202	0	42140	67089	104690	0	169900	100700	107860	37206	153260	51605	67242	131170	62811
VEEAEEEAPKPK	frv2_113609	frv2_113609	yes	yes	0.0051397	99.732	131000	0	0	0	0	26482	0	0	0	0	0	0	0	0	0	0	0	0	3964.8	0	12080	0	0	0	0	0	0	0	0	0	0	0	0	0	0	0	10056	0	0	0	0	0	0
VELAPDFQMGVSNK	frv2_113609	frv2_113609	yes	yes	9.7686e-06	115.09	24064000	64434	78146	54817	241540	339930	102740	11430	0	258870	25182	43470	32732	28817	0	0	36982	0	63793	419380	360830	194050	0	0	0	173070	192410	95027	113450	39451	181870	143900	0	0	600800	353520	337640	0	268350	193730	244080	267360	144780
MAPGIGGFGGLFPLGDSYLVAGTDGVGTK	frv2_113630	frv2_113630	yes	yes	1.4344e-07	79.332	5473700	0	0	78129	340660	0	0	0	0	0	0	78326	34668	0	0	0	0	0	0	454330	123060	0	0	0	0	0	0	0	93965	18773	0	0	0	0	0	0	0	44755	141690	0	0	0	0
ANPFATVLSAAMLLK	frv2_113641	frv2_113641	yes	yes	2.9378e-29	179.97	8289800	82501	114600	159660	351880	0	16248	0	0	28951	76650	41043	18494	24143	28028	20280	10520	0	11589	342830	111230	91752	0	0	0	0	0	0	115770	53353	0	0	0	0	0	0	28715	76217	134470	60464	30182	0	17908
ANVLEASMLWR	frv2_113641	frv2_113641	yes	yes	0.00013527	152.38	6197300	77192	90417	123460	268300	0	0	0	0	0	125140	73481	36811	28432	50743	28925	0	0	0	367580	0	0	28744	0	0	0	0	0	168430	78513	25762	80856	0	0	0	0	0	107350	94256	0	0	0	0
EGLQVFANLRPATVFPQLVDASTLKR	frv2_113641	frv2_113641	yes	yes	9.7205e-29	123.74	12621000	109160	94342	164590	386200	943410	0	0	0	0	241430	128120	46274	60160	0	38751	0	0	0	771520	144170	0	0	0	0	0	0	0	255260	68458	0	0	0	0	0	0	0	0	302960	128140	0	0	0
ELTGGIYFGKPR	frv2_113641	frv2_113641	yes	yes	2.356e-05	150.09	5089200	41840	47462	24880	112030	197660	0	0	0	16601	0	24376	24258	20846	26886	13227	17440	0	0	261620	79194	26105	0	0	0	18442	0	0	101780	38559	58893	0	0	0	0	47505	0	100960	89420	50935	46949	50758	24288
GFGTNEHGQEIGFNTEIYAAHEIDR	frv2_113641	frv2_113641	yes	yes	0.064788	31.986	1195900	0	0	0	0	0	0	0	0	0	0	71654	0	0	0	27107	0	0	0	0	0	0	0	0	0	0	0	0	0	0	0	0	0	0	0	0	0	158900	0	0	0	0	0
HLKPETGLLQLR	frv2_113641	frv2_113641	yes	yes	6.4751e-17	179.94	2342700	19399	38466	25423	233300	0	6096.3	0	0	8021.8	140210	0	0	0	0	0	0	0	50725	287210	74223	48010	0	0	0	0	0	0	112490	15936	0	0	0	0	0	0	0	69763	131230	42897	0	0	23563
ITLLPGDGIGPEVVSVAK	frv2_113641	frv2_113641	yes	yes	1.2345e-16	132.14	30083000	221960	263960	256860	651050	1024700	65498	18423	0	72559	366780	247690	135200	123480	159080	93759	46722	0	79134	1025700	373500	193100	27123	0	0	0	0	0	519570	203880	58306	131390	107540	0	0	0	0	476030	372280	209700	157100	0	108210
LLGGAAFDATGVPLPDDTLSFAK	frv2_113641	frv2_113641	yes	yes	3.5409e-39	145.73	58115000	524630	550880	567800	1798900	2209800	129540	35494	28284	168140	502320	511840	240490	235800	333170	169910	168060	0	94762	1835500	777570	396930	50068	20764	86477	236030	80361	32057	797980	351570	0	299100	179620	0	328100	0	185050	861270	907140	477760	0	169180	0
QSDAILLGAIGGYK	frv2_113641	frv2_113641	yes	yes	1.1659e-09	129.17	2560900	45587	0	0	93251	0	0	0	0	0	0	0	0	0	0	0	0	0	0	158460	82191	0	0	0	0	0	0	0	93167	46201	0	0	44888	0	0	0	0	79609	87743	0	0	79590	0
VTALAQEYPDVELSHMYVDNAAMQLIR	frv2_113641	frv2_113641	yes	yes	2.2522e-23	113.71	43432000	392830	286360	231920	488330	1005400	206390	0	0	143370	696470	0	166050	246630	380120	150920	122810	0	111680	2166700	592150	448630	0	0	0	295640	64573	0	694370	289520	201910	382530	0	0	389990	0	178390	488570	688410	319230	235770	0	197010
YGLGEAEAAERIESAVLETLNK	frv2_113641	frv2_113641	yes	yes	4.8229e-44	156.08	4772000	0	0	120900	0	0	0	0	0	0	254830	222070	123710	109930	226400	0	0	0	0	137760	0	0	0	0	0	0	0	0	0	0	0	0	0	0	0	0	0	0	0	165150	0	0	0
LAWENYYMASDADLIAEQHIWAAVDPNAR	frv2_113645	frv2_113645	yes	yes	0.01788	36.33	76976	0	0	0	0	0	0	0	0	0	0	0	0	0	0	0	0	0	0	0	0	0	0	0	0	0	0	0	0	0	0	0	0	0	0	0	0	0	0	0	0	0	0
LDTNNFYYTLEDVLFEETSK	frv2_113645	frv2_113645	yes	yes	0.0061295	61.616	3507900	0	0	0	0	152610	0	0	0	16746	0	26206	11039	11915	0	0	21684	0	44059	0	69206	88088	0	0	0	58235	0	0	0	0	0	0	15986	0	94100	0	36613	0	127460	67509	60469	0	24193
LDTNNFYYTLEDVLFEETSKK	frv2_113645	frv2_113645	yes	yes	0.062956	41.513	3456000	0	0	0	0	0	0	0	0	42591	0	44236	0	31138	0	28664	29343	0	39025	0	0	95960	0	0	0	0	0	0	0	0	0	0	0	0	0	0	0	0	139800	0	138990	0	0
NVLTAVIPNAPNLR	frv2_113645	frv2_113645	yes	yes	0.00029245	103.76	13667000	0	0	0	168630	346180	72594	10300	13524	79685	0	0	56874	0	0	48500	54315	0	52813	0	176110	202310	79425	24236	75706	168130	115150	41060	0	0	49678	159220	284320	0	250260	165820	113930	52023	197490	157910	216780	280690	140280
SKEHGFFGFR	frv2_113645	frv2_113645	yes	yes	0.047761	57.174	385610	0	0	0	0	0	0	0	0	0	0	0	0	0	8590	0	0	0	0	0	0	0	0	0	0	0	0	0	0	0	0	0	0	0	0	0	0	0	0	0	0	0	0
ATLNFDGVLTLYK	frv2_113656	frv2_113656	yes	yes	1.4467e-15	167.03	6112700	0	0	0	97150	270270	44848	0	0	0	0	74337	16046	66723	79449	66974	59537	0	0	0	113480	0	0	0	0	111770	0	0	0	0	0	168930	0	0	0	59654	46740	0	167350	167830	0	0	0
LWDTFEFPSDTLLPSQVVEK	frv2_113656	frv2_113656	yes	yes	3.6496e-13	121.77	9736700	0	0	0	0	0	169440	0	0	0	0	51410	37585	66258	70553	0	0	0	0	0	511040	412550	32499	20482	126480	267640	139560	0	0	43975	0	340370	155380	208150	491010	132940	81127	0	0	0	0	0	0
LWSTEGLNGAVSR	frv2_113656	frv2_113656	yes	yes	5.7161e-08	125.84	11385000	19506	42540	31103	94453	130870	66656	23371	22901	35078	0	61570	77446	137630	0	116600	108460	0	64703	0	165380	159450	166260	71103	90634	127320	80381	0	0	0	83941	238660	342260	0	367090	167260	64250	0	150180	85722	144650	125720	115950
TIVWYANGDSPAPK	frv2_113656	frv2_113656	yes	yes	0.0014583	88.224	6759200	0	0	0	36578	174980	32807	8160.2	16988	0	0	36823	36980	85064	134790	83843	58293	0	41567	0	80107	131240	80515	35282	41383	67555	0	0	0	0	81124	104910	186990	0	180700	117880	34345	0	110530	38097	84732	65499	0
DATEVNHEDFNEGIIQVQAK	frv2_113691	frv2_113691	yes	yes	0.0060853	56.424	4379500	34886	0	37128	151370	126420	43592	22396	19084	44787	0	0	24443	31502	51535	41852	15660	0	46679	0	58231	0	0	27333	51185	71598	54921	0	0	0	56874	0	0	0	0	0	0	0	188610	55463	59065	0	78353
DSYLILDTLPSEYDSR	frv2_113691	frv2_113691	yes	yes	1.6607e-07	116.86	11150000	50717	50185	0	121490	0	76027	28515	33065	171380	0	0	0	0	0	0	0	0	0	0	216820	221690	44663	38620	0	204810	0	97086	163560	61582	0	0	252880	0	0	0	0	78932	0	0	182480	310350	128030
LAGPQLVQMFIGDGAK	frv2_113691	frv2_113691	yes	yes	8.5556e-31	175.27	22301000	67837	101250	0	0	570720	117230	38500	38032	127170	68330	0	0	78288	196930	122140	92623	9418.4	0	234980	344910	229100	92532	31294	176430	260990	194290	0	165590	44001	0	0	318900	221350	398620	286150	189900	145310	286350	203430	0	313300	305280
QIQELVEAIVLPMTHK	frv2_113691	frv2_113691	yes	yes	2.9589e-05	106.29	9362300	0	37765	41050	0	0	47323	0	0	64925	25297	0	32897	64527	37496	53834	0	0	30223	0	88126	79334	0	0	0	323160	79810	0	55041	0	0	108500	0	0	203990	116070	113520	0	0	0	113390	270910	75174
ATFISHGNTAR	frv2_113703	frv2_113703	yes	yes	0.0094461	77.124	252280	0	4752.4	3382.8	0	0	0	0	0	0	7806	0	4361.5	0	0	0	0	0	0	24029	0	7675.9	0	0	0	0	0	0	11825	5317.8	0	0	8247.5	0	0	0	0	13177	6485	6125.2	0	0	0
FSWIHDR	frv2_113703	frv2_113703	yes	yes	0.056501	69.825	322010	0	0	0	0	0	0	0	0	0	9591	0	0	0	0	0	0	0	0	76161	0	0	0	0	0	0	0	0	0	0	0	0	20179	0	0	0	0	20491	0	0	0	0	0
IAMPAHLMYDGRDDNLFDNYSAVAQR	frv2_113703	frv2_113703	yes	yes	0.0001404	66.906	1256800	0	0	0	0	0	0	0	0	0	0	76178	37310	0	0	0	0	0	0	0	0	0	0	0	0	0	0	0	64707	0	0	0	0	0	0	0	0	93231	0	0	0	0	0
SLEGWAETTLLTHLKPVEK	frv2_113703	frv2_113703	yes	yes	0.00088396	76.82	5226600	0	0	0	0	256350	0	0	0	0	129060	0	29214	52802	51579	32655	0	0	0	599680	122600	59536	0	0	0	0	0	0	126540	41587	0	0	0	0	0	0	0	116290	190890	120470	0	0	0
TIQYLIGSGMDPR	frv2_113703	frv2_113703	yes	yes	0.026793	60.968	2903100	25465	39490	29502	0	133290	0	0	0	0	59227	29128	23738	16808	0	0	14137	0	0	209160	88776	37770	0	0	0	0	0	0	62340	31657	44486	0	0	0	0	0	0	78940	0	0	0	0	0
TIQYLIGSGMDPRTENSPYLGFIYTSFQER	frv2_113703	frv2_113703	yes	yes	0.050558	33.193	1795200	0	0	0	0	0	0	0	0	0	0	163620	0	32942	0	0	0	0	0	193050	0	0	0	0	0	0	0	0	0	0	0	0	0	0	0	0	0	0	0	0	0	0	0
AINALELAMDAIK	frv2_113709	frv2_113709	yes	yes	7.3606e-115	206.66	42771000	82581	204930	204050	521480	951250	285420	41290	26232	377310	69518	165380	107750	112800	185770	171430	154560	7678.7	23655	295730	440300	330800	82192	18491	144070	405630	198130	0	206170	88320	99170	368270	413280	234450	714570	711480	505660	128360	664370	356230	601420	283110	344640
AINALELAMDAIKEIQLK	frv2_113709	frv2_113709	yes	yes	0.00037583	99.273	1631800	0	0	0	0	0	0	0	0	0	0	50513	36472	44000	56373	45233	141240	0	47973	0	0	0	0	0	0	0	0	0	0	0	0	0	0	0	0	0	0	0	0	0	0	0	0
DSFLSLLSNLIAESR	frv2_113709	frv2_113709	yes	yes	4.4623e-166	263.15	61155000	186580	343100	401490	1202000	2231100	264790	4721.4	0	533040	327310	343340	115480	243100	130930	133030	450040	3893	442650	709560	568100	632380	0	0	23030	432000	50822	147620	328580	47960	147200	445380	0	0	31052	404090	436620	50470	884170	341290	400540	0	107430
EGPLFWIDVADK	frv2_113709	frv2_113709	yes	yes	0.001184	96.067	6058900	0	0	0	60434	113180	46567	0	0	51231	0	36530	0	0	0	14618	0	0	22256	0	100370	71485	0	0	0	0	0	0	44586	0	0	41386	0	0	146630	77721	58416	0	116290	36268	0	0	0
KLQEYVDDINENVQK	frv2_113709	frv2_113709	yes	yes	1.0862e-05	115.8	2079500	0	32996	0	0	0	20313	0	0	0	0	0	12379	0	0	7761	6565.7	0	33534	0	0	39595	0	0	13573	0	36030	0	0	0	0	0	56158	0	156210	120970	63928	0	85798	29265	0	52168	0
KLQEYVDDINENVQKLESR	frv2_113709	frv2_113709	yes	yes	0.00023695	95.554	4115200	0	0	0	0	325420	0	0	0	0	0	99553	64172	47008	94768	84343	82095	0	57770	0	0	0	0	0	0	0	69928	0	0	0	0	0	0	0	0	0	0	0	0	163880	201320	0	151460
LQEYVDDINENVQK	frv2_113709	frv2_113709	yes	yes	1.4734e-28	180.06	4318500	19262	0	0	0	0	22866	9728.8	0	80620	0	0	0	0	0	0	0	0	28254	0	0	0	0	0	23072	0	61843	0	0	12731	68094	0	86500	0	147890	98207	66335	30588	0	0	0	49953	30110
LTPFYNVK	frv2_113709	frv2_113709	yes	yes	0.0673	61.962	2417500	0	0	0	0	0	0	0	0	0	0	0	0	0	0	0	0	0	0	0	0	0	0	0	0	0	0	0	0	0	0	0	0	0	0	0	0	0	0	0	0	0	0
LVESLGNLER	frv2_113709	frv2_113709	yes	yes	2.9656e-05	163.9	13583000	51576	62692	46973	144480	328970	50643	15870	22947	104800	20788	31613	33349	46074	40954	35203	32550	0	47080	80694	64332	88380	71638	25744	54986	130380	77391	37233	27662	36400	89695	94073	221800	0	335710	226730	189460	42528	162870	70097	149300	147020	114980
VVNHLLNSLLPFSTTTGGGPLILNHVTYFPGR	frv2_113709	frv2_113709	yes	yes	1.0325e-56	131.2	16641000	0	137210	161420	819580	1027300	0	0	0	51635	0	0	0	0	0	0	0	0	0	0	121830	180120	0	0	0	0	0	0	0	0	0	0	0	0	0	0	0	0	0	0	0	0	0
LLLTLQK	frv2_113726	frv2_113726	yes	yes	0.00043539	132.09	4288700	73499	95457	67287	0	0	10861	0	4508.9	19397	0	0	0	44707	73970	35467	29032	0	0	444920	0	0	0	0	15213	51206	34389	15223	135540	60455	0	0	0	0	0	0	0	160990	0	60420	53099	0	37865
APLIDNPDFKDDPDLYVFK	frv2_113758	frv2_113758	yes	yes	7.9822e-144	234.12	163690000	381620	277270	210290	866750	2458200	867710	373890	390400	674550	220400	631740	544030	796570	1331300	855030	539610	0	415030	903770	1639000	1202000	648070	310980	1086200	2048200	1222400	234680	629800	346370	193070	2007400	2383900	878960	2907500	2616700	548740	819250	2805200	2116500	2537300	3089500	1813100
DNTLVFQFSVK	frv2_113758	frv2_113758	yes	yes	0.00017291	150.69	4384300	0	0	0	0	0	78194	0	0	52793	23279	0	0	0	0	39698	0	0	0	113910	167920	87098	16486	17425	0	142550	0	44705	0	0	0	140360	71821	0	0	0	0	0	192280	111490	102270	0	76293
FYAISAEFPEFTNK	frv2_113758	frv2_113758	yes	yes	4.1474e-37	188.13	81957000	236450	234660	198890	599130	892440	504010	77456	98094	397460	116510	230180	0	338550	373900	299230	216370	0	0	546840	1098900	865950	274480	369940	369980	0	0	0	344410	258090	195760	934110	979130	0	0	1140400	448730	644950	1838100	787710	1212500	1384300	792480
KPEDWDDEEDGEWTAPTIANPEYK	frv2_113758	frv2_113758	yes	yes	0.051617	38.359	4371500	0	0	0	0	0	0	0	0	0	0	0	0	0	0	0	0	0	30843	0	0	0	0	0	81902	0	0	0	0	0	0	163880	0	0	387950	221520	61440	0	0	0	0	0	0
LSLIPFRSNR	frv2_113758	frv2_113758	yes	yes	0.017615	113.71	63539000	220920	847920	1451200	2017800	1524800	87687	19672	0	43426	396370	441370	249960	78718	72886	68088	85280	0	134230	862990	418530	634270	0	12355	67227	36092	0	184520	503680	74807	65367	332030	0	0	0	0	87686	561240	578600	550290	263820	0	433000
QTGSLYTDWNLLPAK	frv2_113758	frv2_113758	yes	yes	0.00081774	90.853	14309000	0	0	0	0	0	0	97812	124410	0	0	0	0	358990	0	315800	0	0	0	0	0	0	311300	212070	0	724600	245570	0	0	0	0	0	719580	0	0	0	0	0	0	0	739310	833160	461330
QTGSLYTDWNLLPAKK	frv2_113758	frv2_113758	yes	yes	1.0594e-20	153.2	62387000	163220	179250	175170	686800	1526700	270330	102230	117570	230160	101830	165800	419450	524870	727710	493020	474420	0	114120	679840	321620	232210	378900	137310	220560	530520	169290	45283	319660	246280	348400	365490	520100	0	1367500	1116800	250010	418710	637620	398160	529480	587470	375420
WKAPLIDNPDFKDDPDLYVFK	frv2_113758	frv2_113758	yes	yes	7.8608e-23	133.92	30324000	0	0	0	293200	718920	0	0	0	0	0	330940	64450	794010	1564500	753960	97928	0	129300	445630	77057	376410	0	0	0	162640	0	0	149510	0	0	153000	0	0	1338900	0	0	169220	1419400	152780	1616300	0	89750
VVEALTSGNPNVSVESVILPDGEQYKDMDTLMK	frv2_113766	frv2_113766	yes	yes	3.0983e-05	62.993	4265000	0	0	0	0	0	0	0	0	0	281700	230560	75507	0	0	0	91281	0	0	525300	0	0	0	0	0	0	0	0	0	118700	0	0	0	0	0	0	0	185400	0	0	0	0	0
GNSTSNVPAPSIEDPGHFPTLGAK	frv2_113808	frv2_113808	yes	yes	4.1035e-06	85.166	95971000	287430	261390	263070	512220	1294200	434550	269840	448760	401470	221080	311330	376990	437270	953480	503410	366460	0	380640	558380	709460	512310	1008300	458640	735040	1186300	873050	305370	339770	206080	668960	972350	2182200	904730	2054100	1887900	40135	323840	779470	490320	568990	781940	0
SVSINEFLKPAEGEGYYNPGGR	frv2_113808	frv2_113808	yes	yes	3.2284e-56	162.81	59433000	161120	102050	0	324280	973540	410330	165350	309260	467790	169030	281760	246450	405460	848360	346760	313930	0	343590	401470	673500	373000	245470	111510	600160	1073400	1057200	246320	166350	73715	53553	605520	854810	0	1043600	985150	304000	249780	491350	399620	498500	739300	416020
TQQNKPAQLPSKPAPPAQAVR	frv2_113808	frv2_113808	yes	yes	0.00099396	81.639	2282800	10839	10964	8444.7	69965	195960	7988.7	0	0	16154	0	0	0	0	16073	0	8941.8	0	18611	0	0	46520	0	0	0	7035.3	0	20295	0	0	70971	21180	0	0	0	0	0	12526	78216	14553	48573	12711	0
DNLKPHHFQEVNR	frv2_113809	frv2_113809	yes	yes	1.6567e-05	115.37	693700	0	0	0	14117	18437	0	0	0	0	0	0	0	0	0	3776.2	0	0	4078.6	11761	14437	12044	0	0	0	0	0	0	11602	0	0	18063	0	0	59984	23738	11313	4163.5	16464	9878.5	9903.1	0	11495
FLQSFAVK	frv2_113809	frv2_113809	yes	yes	0.0027432	104.44	958600	0	0	0	0	0	0	0	0	0	0	0	0	0	0	0	0	0	0	0	66765	47770	0	13193	0	0	23542	0	60985	11234	0	0	0	0	115660	52214	50421	0	0	0	0	0	0
NAAIANSYFVASINR	frv2_113809	frv2_113809	yes	yes	0.012885	80.387	796080	0	0	0	0	0	0	0	0	0	0	29250	25295	0	0	0	0	4987.3	0	0	0	0	0	0	12844	0	43204	0	0	0	0	0	0	0	103490	0	62321	0	0	0	0	0	0
VGDFNESTYYMEGNTGHPVFETAFGK	frv2_113809	frv2_113809	yes	yes	1.2807e-23	119.72	47168000	83731	98743	0	187530	539800	180260	22795	0	0	128690	215430	162610	218110	306550	192300	247010	0	348030	569790	761600	647130	0	0	157760	491250	0	0	184530	64997	0	524510	692640	0	1086100	584060	228040	150270	718530	319920	799240	419260	370170
YNMVIISSILER	frv2_113809	frv2_113809	yes	yes	0.0055529	79.875	2214600	0	0	0	0	0	0	0	0	49970	0	0	0	0	0	0	22866	0	0	0	125800	124020	0	0	0	0	0	0	0	0	0	0	0	0	0	0	0	0	0	102830	0	0	0
RGEGPTLVECETYR	frv2_113854	frv2_113854	yes	yes	0.075014	64.534	8254600	28864	46924	29568	90544	173770	40512	17457	27060	48844	0	35966	19976	33218	61197	33826	26373	0	23648	0	0	42913	75770	34085	48456	86144	66995	28857	0	0	71980	101030	291210	0	230010	238730	73714	46594	73915	29966	44310	93178	44482
SAVSAHNILPLNVIDDLESDISFVR	frv2_113882	frv2_113882	yes	yes	1.8104e-22	113.36	6394600	0	0	0	0	0	0	0	0	0	0	228310	28649	110700	0	56358	128620	0	91231	0	0	156230	0	0	0	103920	0	0	0	0	0	102390	0	0	261180	64169	0	0	0	110010	84676	0	0
LTGMAFR	frv2_113923	frv2_113923	yes	yes	0.023458	101.69	563900	0	0	0	0	0	0	0	0	0	0	0	0	0	0	0	0	0	0	0	0	0	0	0	0	0	0	0	0	0	0	0	0	0	0	0	0	0	0	0	0	0	0
SVGSTGMAAGQFLDLEGGPNAVGFIQDKK	frv2_113928	frv2_113928	yes	yes	9.302e-06	68.916	8415500	98889	97418	84718	229380	0	0	0	0	0	162780	120020	48020	58719	0	0	0	0	0	668210	284790	0	0	0	0	0	0	0	0	83034	0	0	0	0	0	0	0	135220	0	0	0	0	0
ILQTGVHTVVGTPGR	frv2_113993	frv2_113993	yes	yes	8.2967e-38	188	15480000	33539	20265	20631	79692	160680	54540	5542.4	21036	65514	25391	61454	50444	44685	31185	48985	56307	0	56708	187490	299240	184780	85312	36640	46085	134500	86883	19723	74574	40973	171040	153480	373060	0	156310	71034	158060	71637	212090	121390	60331	213410	123710
MNELLSTDGQELITTYDEVYDTFDAMGLQENLLR	frv2_113993	frv2_113993	yes	yes	6.8973e-07	66.124	4397400	0	0	0	0	169480	0	0	0	0	0	0	0	0	0	0	0	0	0	220150	296140	202760	0	0	0	0	0	0	0	0	52342	0	0	0	45866	138640	0	0	143780	0	0	0	0
ILSNTLR	frv2_114023	frv2_114023	yes	yes	0.057997	69.198	571650	0	0	0	0	0	0	0	0	0	0	0	0	0	0	0	0	0	0	0	0	0	0	12285	0	0	0	0	0	0	0	0	0	0	0	0	33712	0	0	26744	0	0	33458
VFVNGQLIGTFVGNWVK	frv2_114031	frv2_114031	yes	yes	1.288e-33	163.34	5127200	0	0	0	0	0	0	0	0	0	0	0	0	0	0	0	0	0	0	0	0	0	0	0	0	0	0	0	0	0	0	0	0	0	0	0	0	0	0	0	0	0	0
EHAPSIIFMDEIDSIGSAR	frv2_114062	frv2_114062	yes	yes	5.07e-70	190.18	24875000	0	0	0	116140	0	177580	58403	61120	177220	54677	69782	57611	44775	49680	62432	61050	0	71679	192420	166860	318890	0	0	0	363100	238920	53600	88480	37199	0	401560	136620	0	691300	162460	279290	0	517850	244510	504280	435170	0
EVIELPIK	frv2_114062	frv2_114062	yes	yes	0.02266	73.665	3634300	76746	121030	71398	300070	176150	0	0	0	0	34832	14996	15057	0	0	0	0	0	0	230610	0	0	0	0	21870	0	0	0	115110	0	79610	0	0	0	0	0	0	0	90913	0	0	0	0
EVIELPIKHPELFESLGIAQPK	frv2_114062	frv2_114062	yes	yes	6.1077e-24	131.9	24501000	49318	0	0	204900	673620	133700	0	0	164930	0	140020	0	120410	136020	171960	171680	0	192070	337080	414350	273510	0	0	0	401330	101840	0	0	75745	0	0	103870	0	558930	251010	142850	71864	443440	467700	453110	231430	263740
IDILDQALLRPGR	frv2_114062	frv2_114062	yes	yes	0.00069283	96.334	29154000	0	180360	61487	415120	687580	209740	20379	87891	174840	0	91261	31494	18648	105050	30162	76134	0	87932	337990	408640	212200	62495	29029	0	370310	286390	85468	177780	0	42598	264380	183790	0	0	435080	142730	181810	190620	68844	429070	650860	267270
MLREELQLLQEPGSYVGEVVK	frv2_114062	frv2_114062	yes	yes	2.2923e-25	139.11	41595000	135990	99761	160720	392410	916460	197670	20915	47057	173290	130050	329770	212600	300880	358260	261190	271240	0	250680	340670	415370	236260	0	0	71970	632770	349240	113380	178050	83500	0	252100	0	0	675450	309980	200060	158150	803380	458530	385020	158110	269310
NDSYVLHLVLPSKVDPLVNLMK	frv2_114062	frv2_114062	yes	yes	1.6429e-43	152.06	12364000	0	0	98081	249740	483380	0	0	0	117170	40978	129620	46246	0	89412	92424	124070	4790.7	131710	0	0	164450	0	0	0	242350	0	0	0	37229	0	205890	0	0	282150	0	101520	0	245330	209300	231690	0	0
QYYTQHIHELQLLLR	frv2_114062	frv2_114062	yes	yes	0.022303	54.871	9260600	39142	0	0	137610	416050	0	0	0	51493	25287	52712	38754	42458	161820	54605	55656	0	29363	0	110800	81699	0	0	0	222670	0	0	94332	0	0	141000	0	0	0	0	0	0	167390	108780	150430	0	130210
RVHVTQEDFEMAVAK	frv2_114062	frv2_114062	yes	yes	0.0093469	68.033	1855100	0	0	0	0	0	0	0	0	0	11604	0	0	6882.1	24677	21016	15937	0	0	0	0	0	0	0	0	0	0	0	0	0	0	39695	68999	0	184950	129720	41967	0	0	0	0	75770	0
TMLELLNQLDGFEASNK	frv2_114062	frv2_114062	yes	yes	0	294.94	30606000	0	106020	85118	0	351650	195290	14336	19249	201410	0	141070	0	88990	167770	104710	149270	0	239000	296140	353890	426870	0	0	0	570560	255180	0	0	0	68572	328880	118720	0	671140	138560	389960	11015	582910	304880	485500	130910	247180
VHVTQEDFEMAVAK	frv2_114062	frv2_114062	yes	yes	0.00019031	106.58	386830	0	0	0	0	0	0	0	6565.7	0	0	0	0	0	0	0	0	0	0	0	0	0	0	0	0	23246	37736	0	0	0	0	0	64817	0	58246	0	0	0	0	0	0	0	0
VPDSTYDMIGGLDQQIK	frv2_114062	frv2_114062	yes	yes	1.3289e-10	124.04	4912500	0	0	0	0	0	62677	0	20907	100480	0	0	0	0	0	0	0	0	0	0	0	114500	0	0	42476	0	113730	0	0	0	0	115670	0	0	0	171340	118180	0	0	0	0	168090	0
VPDSTYDMIGGLDQQIKEIK	frv2_114062	frv2_114062	yes	yes	0.059058	43.37	1673200	0	0	0	0	0	0	0	0	0	0	136920	100800	25360	70469	27861	48176	0	35532	0	0	0	0	0	0	0	0	0	0	0	0	0	0	0	0	0	0	0	0	0	0	0	0
IGGNAPDTNYLFMGDYVDR	frv2_114111	frv2_114111	yes	yes	0.00058384	82.406	6230000	0	0	0	0	0	0	0	0	78333	0	0	39039	47857	0	51304	43593	0	55298	0	165630	0	0	25935	0	155170	0	0	0	0	0	0	0	0	0	0	0	0	234510	0	216560	0	0
SVYVNSSNVDDYLVESITRPAQDPNAGEVYYR	frv2_114184	frv2_114184	yes	yes	2.1452e-07	73.072	3028700	0	0	79588	0	0	0	0	0	0	113660	0	0	0	0	0	0	0	0	595200	0	0	0	0	0	0	0	0	0	0	0	0	0	0	0	0	0	0	0	0	0	0	0
DLSVVDELGNR	frv2_114186	frv2_114186	yes	yes	0.033199	61.593	390100	0	0	0	0	0	0	0	0	0	0	19424	0	0	22284	10152	10609	0	0	0	0	0	0	0	0	0	0	0	0	0	0	0	0	0	0	0	0	0	0	0	0	0	0
ITSILWVGYPGEAGGAAIADVIFGYHNPSGR	frv2_114186	frv2_114186	yes	yes	0.0029674	43.306	2086600	0	0	0	0	0	0	0	0	0	0	0	0	0	0	0	0	0	0	0	0	0	0	0	0	0	0	0	0	0	0	0	0	0	0	0	0	0	0	0	0	0	0
LPMTWYPQSYVDK	frv2_114186	frv2_114186	yes	yes	0.00013666	109.07	9159100	0	0	0	0	0	95434	13023	17752	62190	0	0	0	0	0	0	40063	0	0	0	76695	0	0	0	0	0	0	0	0	0	0	0	0	0	0	156670	0	0	0	0	0	0	117410
VNILLPGQQQQLVTEVANAAK	frv2_114186	frv2_114186	yes	yes	0.012665	53.958	4412300	0	0	0	0	0	0	0	0	0	0	0	0	0	0	0	0	0	0	0	0	0	0	0	0	0	0	0	0	0	0	0	0	0	0	0	0	0	0	70423	129200	0	0
VPMTNMNMRPDPATGYPGR	frv2_114186	frv2_114186	yes	yes	0.00093889	75.968	13023000	0	0	0	83731	219680	93488	24202	18460	23308	0	0	21402	37701	79615	63621	48703	0	33765	0	50892	50042	38298	28347	59876	39467	23532	0	0	0	0	107410	125710	0	101090	95482	0	0	107050	73225	0	106630	92212
FSLSSHNIR	frv2_114198	frv2_114198	yes	yes	0.00016164	109.29	270530	0	0	0	0	0	0	0	0	0	0	0	7029.9	5401.2	6662.6	5056.7	0	0	5059.6	10382	0	0	6212.8	0	0	0	0	0	0	0	16418	0	0	0	0	0	0	0	0	10641	15750	0	0
MVAADMVSYGAIVNSFEELEPEYASDFKR	frv2_114198	frv2_114198	yes	yes	0.0012182	52.019	1656100	0	0	0	0	0	0	0	0	0	0	0	0	69147	90404	42083	58314	0	52255	0	0	0	0	0	0	84708	0	0	0	0	0	0	0	0	150020	0	0	0	0	0	131320	0	0
SGGILVDMTTSDPSLAVEIAAAASSK	frv2_114208	frv2_114208	yes	yes	0.00055394	60.814	487470	0	0	0	0	0	0	0	0	0	0	31109	0	0	0	0	23669	0	0	0	0	0	0	0	0	61526	0	0	0	0	0	0	0	0	0	0	0	0	0	0	0	0	0
EDLTGTILFVGR	frv2_114219	frv2_114219	yes	yes	0.010706	93.839	3740900	0	0	0	0	0	27936	0	0	75485	0	14644	0	14935	0	9431.3	16707	0	37107	60250	66318	51640	0	11629	0	56943	0	0	0	0	0	0	0	0	0	0	595440	0	0	0	0	0	76514
ELGVVLPFSTGGLTK	frv2_114219	frv2_114219	yes	yes	0.00045184	96.707	10564000	0	0	0	0	0	48300	0	0	121270	0	0	52133	0	25185	52694	0	0	79598	0	208140	139900	0	0	0	138600	0	0	0	0	0	0	0	0	0	145780	254140	0	335830	176820	210960	110340	0
ELLPIGSVNSSTR	frv2_114219	frv2_114219	yes	yes	0.011785	69.03	6902500	0	0	0	0	0	45014	0	12055	48264	0	0	0	0	0	71714	0	0	117360	0	0	93063	52938	15325	33550	83116	68185	52679	65067	0	38580	0	132530	0	177870	134880	118540	0	123380	76450	0	135240	0
VPTTVDFVADRPFLFVIR	frv2_114219	frv2_114219	yes	yes	0.00012365	93.237	20250000	0	89247	79618	216570	457210	113500	0	0	286130	0	54903	42441	44572	116510	68446	71716	5708.5	100800	189970	0	225720	0	0	0	355740	41348	61764	106790	36733	0	230320	0	0	529660	71654	536630	53892	319390	116180	193310	80220	160090
DGTTTAGNASQVSDGAAAVLLMK	frv2_114223	frv2_114223	yes	yes	0.0025504	58.755	257600	0	0	0	0	0	0	0	0	0	0	0	0	0	0	0	0	0	0	0	0	0	0	0	0	0	0	0	0	0	211720	0	0	0	0	0	0	0	0	0	0	0	0
DTLSDDLLASVLK	frv2_114223	frv2_114223	yes	yes	3.1203e-05	111.72	589660	0	0	0	0	0	0	0	0	0	0	0	0	0	0	0	0	0	0	0	0	0	0	0	0	0	0	0	24947	0	0	0	45678	0	0	0	0	0	60471	0	76363	59819	0
MAAFYAGFPETVPLR	frv2_114223	frv2_114223	yes	yes	0.0025715	88.282	1378000	0	0	0	0	0	0	0	0	59762	0	0	49582	0	0	0	0	0	0	0	0	0	0	0	0	87702	0	0	0	0	0	0	0	0	145940	137420	0	0	0	0	0	0	0
QIIVSVDDGIRPNANLADLAK	frv2_114223	frv2_114223	yes	yes	0.0066389	56.906	7003700	0	0	0	0	0	0	0	0	150470	73120	123100	71826	112350	0	111090	107350	0	108110	0	345100	131610	0	0	0	254540	149440	0	0	0	0	0	0	0	509760	287930	140020	0	0	0	436730	0	444700
SFSAVGVDPSVMGVGPAFAIPAAVK	frv2_114223	frv2_114223	yes	yes	3.2873e-10	94.271	5639900	0	0	0	0	0	0	0	0	0	90000	86763	50862	68454	89092	76413	72381	0	64479	0	0	108940	0	0	0	0	63967	0	125600	50472	0	148370	0	0	199690	0	91928	97129	0	126400	133840	114510	121650
VNVNGGAIALGHPLGATGAR	frv2_114223	frv2_114223	yes	yes	0.024939	51.688	1171500	0	0	0	0	0	0	0	0	0	0	0	6324.4	0	0	0	0	0	0	0	37263	30746	0	0	0	0	0	0	34831	0	0	0	66628	0	62380	63023	24444	42752	40651	0	49520	86965	28399
TRDPQVLEGLDAVLDVGGVYDPAR	frv2_114251	frv2_114251	yes	yes	0.045209	39.171	1977200	0	0	0	0	0	0	0	0	0	0	0	0	0	0	0	0	0	0	0	0	0	0	0	0	0	0	0	0	0	0	0	0	0	0	0	0	0	0	0	146900	0	0
AGVNVSVVYGQMPPDAYR	frv2_114287	frv2_114287	yes	yes	6.0677e-26	138.46	2751500	86252	0	0	0	0	0	0	0	0	102840	114120	20824	50643	0	29920	0	0	0	0	0	0	0	0	0	0	0	0	0	111880	0	0	0	0	0	0	0	0	0	0	0	0	0
FREDVWSRPGGGGGISR	frv2_114287	frv2_114287	yes	yes	1.795e-15	132.51	14639000	87983	79571	54738	402000	432180	25627	0	0	63893	144570	90881	40445	59130	151410	45988	31920	0	84141	555630	0	0	0	0	0	85999	0	0	272960	66748	0	0	173510	0	0	0	168740	0	328500	88112	96870	161020	0
GGASADQKPGPIPFFAAGISSVLHPK	frv2_114287	frv2_114287	yes	yes	1.4447e-15	103.51	7534700	129220	104290	144390	459340	714990	0	0	0	0	65791	24360	46298	0	0	0	0	0	0	706880	0	0	0	0	0	0	0	0	351350	0	0	0	0	0	0	0	0	230800	0	0	0	0	0
HFHSIQK	frv2_114287	frv2_114287	yes	yes	0.026001	84.244	28549	0	0	0	14644	13906	0	0	0	0	0	0	0	0	0	0	0	0	0	0	0	0	0	0	0	0	0	0	0	0	0	0	0	0	0	0	0	0	0	0	0	0	0
IESILVSLPLTSR	frv2_114287	frv2_114287	yes	yes	4.293e-09	147.73	65810000	455420	575390	513230	1139100	1297800	190710	28973	48381	319400	333120	278080	138300	158290	155520	141800	101860	10133	213840	1765700	618800	351760	119540	69167	137000	239390	185680	214880	565540	326150	255870	279160	522040	0	487970	640830	786180	702850	729790	441910	321760	516680	302700
NPFAPTLHFNYR	frv2_114287	frv2_114287	yes	yes	1.0425e-05	121.36	32775000	83191	172800	395890	913700	1109300	39201	18553	41145	212970	111230	199010	64008	40248	59254	33180	46388	0	51695	513200	450420	232290	0	0	38667	57736	0	30927	460990	171240	122770	183230	440870	0	381690	224590	344210	489580	210280	210340	306430	0	60535
QWWFGGGTDLTPAYIFEEDVK	frv2_114287	frv2_114287	yes	yes	8.567e-56	163.78	26375000	221480	135190	207310	389520	936040	0	0	0	110110	333710	299730	66188	92973	56463	51615	73055	0	125760	1453500	68406	238830	0	0	0	127770	0	0	336130	87055	0	76268	0	0	180480	0	175780	114030	384530	119480	155470	0	56577
TGGRIESILVSLPLTSR	frv2_114287	frv2_114287	yes	yes	0.0067325	65.105	1070400	0	0	0	0	0	0	0	0	0	55699	40458	33459	33563	55614	0	0	0	34409	0	0	0	0	0	0	0	0	0	0	0	0	0	0	0	0	0	0	0	0	0	0	0	0
YVEFNLVYDR	frv2_114287	frv2_114287	yes	yes	0.0012084	129.82	11149000	146990	114610	95801	129350	231360	49258	0	17602	74008	86991	89315	35516	53831	0	37409	42512	0	70187	387140	125360	88573	0	0	0	56419	0	39425	120500	64450	0	0	0	0	146930	132470	0	232980	156690	92073	0	0	53737
YGFSEDDVTVLIDTDSSYTEPTGK	frv2_114337	frv2_114337	yes	yes	1.5364e-50	152.38	18648000	73326	132040	0	0	0	182460	0	0	178660	0	113100	63627	213240	192260	144740	183500	0	169240	0	227680	210940	51775	0	204300	364100	331530	114280	0	58353	0	412700	255350	0	748020	0	206720	0	0	181000	260620	0	208790
AHQLVMEGYNWGHDQK	frv2_114369	frv2_114369	yes	yes	4.4533e-05	105.5	5187900	0	0	0	0	62930	24726	0	0	18316	0	17292	0	0	0	0	6784.3	0	7383.6	32904	74442	59267	0	0	15214	98384	23893	0	0	0	29405	77621	99061	0	229410	148490	33965	0	167850	21419	142310	102540	0
GAGYTFGQDISEQFNHTNNLK	frv2_114369	frv2_114369	yes	yes	0.0083008	52.814	11280000	0	0	0	0	0	0	0	43559	116980	0	0	0	0	24934	92333	91274	0	0	0	0	0	0	0	85431	305170	0	40847	0	0	0	217850	0	0	472890	301660	201090	0	0	0	245160	0	0
SSPADIRPVLQSYQGSDIPSEFIR	frv2_114440	frv2_114440	yes	yes	1.644e-05	82.56	10904000	0	0	0	0	341120	90788	0	0	0	88551	81079	85046	78736	0	64330	86440	0	88238	0	0	0	0	0	99693	211520	152900	0	99670	0	0	0	162840	0	268000	187220	0	0	0	143140	257570	0	199170
AHAFYPNPIVFK	frv2_114460	frv2_114460	yes	yes	5.3256e-05	115.57	3926400	0	0	0	0	0	0	0	0	45983	0	0	0	0	0	15127	31094	0	137380	0	0	0	0	0	0	37309	0	41026	0	0	24269	0	0	0	0	0	222740	0	0	36789	109260	0	38599
GLPNSLPSQYLGLFSK	frv2_114460	frv2_114460	yes	yes	0.0099296	65.105	3860700	0	0	0	0	0	0	0	0	0	0	0	44164	0	48580	94667	0	12839	201490	0	0	0	0	0	0	0	85423	0	0	0	0	0	143240	0	282200	0	821120	0	0	0	0	0	0
KIDVTLAPIDVVKPK	frv2_114460	frv2_114460	yes	yes	4.0252e-13	141.82	1939500	0	0	0	0	0	0	0	0	26474	0	0	0	0	0	11477	14692	0	66641	0	0	0	0	0	0	0	23048	22447	0	0	18547	0	0	0	0	101540	109180	0	42969	0	38189	52100	36157
SNNGNSGNHVFGVELDTIQSSEFNDINDNHVGIDINDLK	frv2_114460	frv2_114460	yes	yes	8.3567e-05	46.593	2742300	0	0	0	0	0	0	0	0	0	0	0	0	0	0	0	116880	0	235630	0	0	0	0	0	0	0	0	0	0	0	0	0	0	0	327380	0	237040	0	0	0	0	0	0
VNGQAQNLVISELPK	frv2_114460	frv2_114460	yes	yes	2.8861e-09	122.12	1044600	0	0	0	0	0	0	0	0	0	0	0	0	0	0	0	0	0	46007	0	0	0	0	0	0	0	0	41703	0	0	0	0	0	0	112020	0	194150	0	0	0	0	0	0
AVFLDLEPTVIDEVR	frv2_114480	frv2_114480	yes	yes	0.017144	63.29	3062500	0	0	0	0	0	0	0	0	0	0	0	0	0	0	0	0	0	0	0	114290	136320	50520	0	0	0	0	45416	43003	0	0	0	0	0	0	0	0	0	235170	0	0	102330	0
LFNSLK	frv2_114489	frv2_114489	yes	yes	0.027822	88.643	205740	0	0	0	0	0	0	0	0	0	0	0	0	0	0	0	0	0	0	0	0	0	0	0	0	0	0	0	0	0	0	0	0	0	0	0	0	0	0	0	0	0	0
SLFAIDGITR	frv2_114489	frv2_114489	yes	yes	0.0051927	88.596	1038000	0	0	0	0	0	0	0	0	0	0	14829	0	16982	0	25134	15444	0	0	0	0	0	0	0	0	0	29484	0	0	0	0	0	65492	0	107370	0	0	0	0	0	0	0	0
VFFGSDFVTVTK	frv2_114489	frv2_114489	yes	yes	4.5004e-06	149.23	5630100	0	78625	0	0	0	0	0	0	0	0	0	59630	42370	155440	40776	51959	0	0	0	79338	0	124410	0	0	125570	0	0	0	0	0	0	144930	0	211740	0	0	0	175150	101800	0	208970	0
ILQVADMHYANGEK	frv2_114498	frv2_114498	yes	yes	0.0049732	81.651	0	0	0	0	0	0	0	0	0	0	0	0	0	0	0	0	0	0	0	0	0	0	0	0	0	0	0	0	0	0	0	0	0	0	0	0	0	0	0	0	0	0	0
SMDAAFAPAIASNIPWVAVLGNHDQEGTLSR	frv2_114498	frv2_114498	yes	yes	6.0585e-05	55.852	5029100	0	0	0	0	0	0	0	0	107710	0	0	0	66472	194850	84157	77705	0	76200	0	0	155950	0	0	0	0	101200	0	0	0	0	0	0	0	0	0	0	0	0	0	0	0	0
SQEITQAPPVSTTETEPSLPVQPESSETDASLSVQK	frv2_114514	frv2_114514	yes	yes	0.00013564	50.891	5756600	238280	0	0	0	0	0	0	91326	0	0	0	0	0	0	0	0	0	0	251910	116270	0	0	0	0	0	0	0	215450	220920	0	0	0	0	0	0	0	181000	0	0	0	0	0
TVEYSGPSLSYYINEFK	frv2_114514	frv2_114514	yes	yes	6.4177e-194	262.82	132330000	1586400	1307900	1190500	2345200	3827400	0	170450	286880	0	2571800	1371500	751720	915220	1011500	571430	323420	0	208350	4604200	1162300	782450	0	0	338230	586220	0	132670	1821800	1049500	320630	430080	419610	0	520610	233620	187760	2044600	1727200	897280	0	0	401190
VKDESQTQPDTSSFDWTLYLE	frv2_114514	frv2_114514	yes	yes	7.0027e-06	97.384	20588000	327230	458190	508070	681990	284560	0	0	0	51592	320780	308540	0	0	185700	0	81268	0	0	744030	251050	205720	0	0	67471	159510	0	0	174350	159360	0	66654	0	0	110080	0	0	0	370260	0	0	0	0
VSMEWLAEEK	frv2_114514	frv2_114514	yes	yes	0.0043312	91.313	244370	0	0	0	0	0	0	0	0	0	0	0	0	0	0	0	0	0	0	0	0	0	0	0	0	0	0	0	0	0	0	0	0	0	0	0	0	0	0	0	0	0	0
AIGGSSLEDGQIELMLHR	frv2_114628	frv2_114628	yes	yes	1.6778e-05	106.31	15145000	0	0	0	0	0	45712	14025	0	104160	0	0	0	0	0	0	0	0	94467	0	0	145030	0	0	35898	520820	350510	73267	0	0	0	0	0	0	597650	616270	722380	0	0	0	131040	0	0
AIGGSSLEDGQIELMLHRR	frv2_114628	frv2_114628	yes	yes	0.016048	55.975	2169200	0	0	0	0	0	0	0	0	0	0	0	26926	38742	113290	46967	45610	0	121940	0	0	0	0	0	0	99222	0	32697	0	0	0	0	0	0	70642	0	0	0	0	0	0	0	0
ELTVELAPMEIR	frv2_114628	frv2_114628	yes	yes	9.9147e-17	177.83	16395000	19579	34217	0	61266	0	94841	63656	81367	202770	0	20308	39134	49845	145570	81224	114810	0	190590	0	0	89180	94461	38252	193560	270730	372070	297330	0	0	0	206970	258930	0	473010	511720	579190	0	0	58550	105880	0	170340
LAHLYEIEEDKDMSVITSVELK	frv2_114628	frv2_114628	yes	yes	2.2347e-33	146.97	6104000	0	0	0	0	0	91316	0	0	192570	0	0	0	0	135710	46063	0	0	187890	0	0	0	0	0	0	307230	229170	0	0	0	0	278930	0	0	454020	282970	112710	0	0	0	0	0	151080
QVPVTVLHGPIIDEVHQQINPWIYQITR	frv2_114628	frv2_114628	yes	yes	0.068054	29.138	353700	0	0	0	0	0	0	0	0	0	0	0	0	0	0	0	26217	0	50151	0	0	0	0	0	0	0	0	0	0	0	0	0	0	0	0	0	0	0	0	0	0	0	0
TFGQEIYSPLLLAFSEK	frv2_114628	frv2_114628	yes	yes	2.5204e-07	118.48	2276800	0	0	0	0	0	0	0	0	71817	0	0	0	0	0	0	0	0	15278	0	0	0	0	0	0	64035	52008	0	0	0	0	0	0	0	0	0	127620	0	0	0	0	60859	0
VTTFSGFDSSYTLPENIAIITLQEFDHGTVLLR	frv2_114628	frv2_114628	yes	yes	8.3062e-05	55.669	1580200	0	0	0	0	0	0	0	0	0	0	26741	0	0	0	0	0	0	0	0	0	66169	0	0	0	0	0	0	0	0	0	0	0	0	0	0	0	0	0	0	0	0	0
AHAESVNLQFETPLDEDTAR	frv2_114638	frv2_114638	yes	yes	8.4365e-14	126.4	23248000	228920	328820	236580	534400	447670	80493	56841	79315	125430	132570	125740	71740	118360	192040	74926	0	0	109940	612270	176110	0	76082	70821	97495	0	0	0	278130	241620	186960	184890	182770	0	0	0	0	424660	0	189470	231160	0	230150
ESNNFPTPLEVSNKDDVAVGR	frv2_114638	frv2_114638	yes	yes	0.0066951	56.817	19710000	183800	231930	94466	445100	312070	76459	0	42023	116180	78730	0	42708	0	0	63879	0	0	0	621860	240100	181430	62003	17596	72638	121480	173500	47420	329280	205730	156280	0	207070	0	329500	227370	121450	369190	325470	0	0	0	0
FGPIAVDR	frv2_114638	frv2_114638	yes	yes	0.015021	88.819	1585300	17336	28256	18164	63444	43043	4256.1	0	0	0	15931	8675.6	7013	6234	0	7674.4	0	0	0	70975	0	0	14235	0	0	0	0	0	42872	19129	31299	0	0	0	0	0	14076	30607	0	0	0	0	0
GAALNAIQIAEMLL	frv2_114638	frv2_114638	yes	yes	1.2114e-47	197.36	8975900	78949	102790	93514	237170	344880	32015	0	0	19590	153850	84128	30499	58761	22910	14170	10221	0	6398.5	285680	60856	56246	0	0	9343.9	37502	11361	0	125020	10477	58031	20130	0	0	71441	65422	8364.1	43295	97689	53785	37187	0	14857
GTIVVDNSSAFR	frv2_114638	frv2_114638	yes	yes	1.0933e-05	143.42	6601400	50208	102920	70172	240810	140320	17046	8873.9	13000	22575	46830	32792	29173	38873	0	0	27996	0	18952	218950	66391	0	28021	10779	22032	27446	39347	0	145110	70439	82802	38272	0	0	70081	52704	30533	118690	100140	45681	48722	50334	54966
KGAALNAIQIAEMLL	frv2_114638	frv2_114638	yes	yes	1.189e-05	115.34	29311000	233200	287420	309180	620730	1336500	90005	0	0	50349	376180	175130	235050	195430	322710	192680	144310	0	82365	769940	145540	112850	0	0	21058	108960	35875	0	322760	104970	0	97817	0	0	115280	0	27042	210830	358750	125780	238880	31054	0
MDENVPLVIPEVNPEAMAGIR	frv2_114638	frv2_114638	yes	yes	4.08e-12	118.05	58267000	0	0	757800	1322800	1647600	66630	93274	141340	340960	664920	492800	277210	0	348570	234210	52852	0	243990	1010500	621540	534330	83390	0	135580	438470	324020	0	259080	506200	0	180040	432430	0	546230	83161	141770	1568800	913100	256520	567450	360240	255460
MVVSTYQAASGAGAAAMEELELQTR	frv2_114638	frv2_114638	yes	yes	1.9034e-22	116.55	11242000	242440	117690	88610	211960	0	0	0	0	0	355890	279860	92764	117130	205120	32876	0	0	0	0	223940	150860	0	0	0	0	0	0	190790	0	0	0	0	0	0	0	0	0	0	0	0	0	0
NAPGVVVIDDRESNNFPTPLEVSNKDDVAVGR	frv2_114638	frv2_114638	yes	yes	9.9801e-44	121.62	38766000	321600	323100	606190	512700	1801900	75366	0	0	0	1128500	856670	520040	688410	1376300	511360	386240	0	266970	856290	0	0	0	0	0	321130	0	0	126480	248230	0	196230	0	0	0	0	0	607700	259570	479950	269580	0	188600
QYAFNLFSHNAPILSNGYNEEEMK	frv2_114638	frv2_114638	yes	yes	3.8573e-40	147.17	105490000	761960	484800	433670	1057900	2242700	253220	79705	150340	407230	1634600	1248400	574220	671550	886570	629340	340240	0	242550	4113000	1479700	825320	0	0	187730	603530	0	0	1393900	678980	0	731430	299320	0	817970	398920	212310	1336500	1222900	0	639560	685060	360020
IVYFEDMNEGLESAPAAFVGLFHGK	frv2_114657	frv2_114657	yes	yes	0.064445	32.035	126440	0	0	0	0	0	0	0	0	0	0	0	0	0	0	47077	0	0	0	0	0	0	0	0	0	0	0	0	0	0	0	0	0	0	0	0	0	0	0	0	0	0	0
SGEYVFVSAASGAVGQLVGQLAK	frv2_114657	frv2_114657	yes	yes	0.0019937	60.761	9878800	0	0	0	0	123560	59627	0	0	22471	0	0	9891.5	21829	0	18512	28297	0	39704	0	146700	356800	0	0	69264	62574	0	158560	0	0	0	350480	0	0	136450	0	71907	0	494160	154790	301330	0	240090
AVMEKYPPYQSIFAK	frv2_114753	frv2_114753	yes	yes	0.015374	79.337	4168600	0	0	0	0	0	0	0	0	0	0	42143	33642	27836	146270	28211	54747	0	112100	0	0	0	0	0	0	164560	0	0	0	0	0	79124	0	0	0	76398	84626	0	0	0	151890	0	65836
AVNITINSIGTELTR	frv2_114753	frv2_114753	yes	yes	4.0288e-89	223.14	29358000	0	47962	0	116400	572910	104670	71656	68383	226750	15414	85470	106250	127770	233670	166920	127680	11122	202450	142330	367080	193980	388690	97751	205160	552450	359010	135270	0	34907	90957	536850	395790	132090	659050	609880	343400	68069	229360	271150	555780	483840	700410
LGGATAEIMSDLLAFEADR	frv2_114753	frv2_114753	yes	yes	6.5613e-70	191.61	2408000	0	0	0	0	0	0	0	0	0	0	0	0	0	0	0	0	0	0	0	0	110210	0	0	0	83339	0	0	0	0	0	116490	0	0	155040	0	35239	0	0	0	0	0	0
LGGATAEIMSDLLAFEADRR	frv2_114753	frv2_114753	yes	yes	3.0851e-13	122.63	29287000	0	0	0	0	763500	139520	8974.6	0	252810	0	0	131500	186560	316550	233230	223520	0	246010	0	0	463000	0	0	0	771000	156820	0	0	0	0	575990	0	0	781670	73740	161800	0	349450	411290	520160	54479	262650
MHLSATEYGPYLQNEPSPLHTTTIVEK	frv2_114753	frv2_114753	yes	yes	2.7979e-60	153.6	45187000	0	0	0	0	210810	275630	21039	0	307780	0	0	0	161070	269360	183000	164870	0	280600	178560	517780	545470	0	0	444440	1443100	814670	273310	0	49642	0	1025100	1432700	0	2512900	1613000	543650	0	0	367580	1014900	1083800	731860
VHDSVVFIF	frv2_114753	frv2_114753	yes	yes	0.06618	56.721	4021300	0	0	0	0	0	40248	0	0	0	0	0	9117.9	26049	0	17336	0	0	19057	0	56413	0	65979	38378	0	118810	58334	57673	0	0	0	121050	0	0	173310	122560	81884	0	0	44394	0	93578	52945
YPPYQSIFAK	frv2_114753	frv2_114753	yes	yes	0.0093732	80.231	4035100	0	0	0	0	0	0	0	0	0	0	19121	0	0	0	0	0	0	0	0	0	0	0	46163	0	0	0	0	0	0	0	0	0	0	0	0	0	0	0	0	0	0	0
ELENTTLYGSR	frv2_114795	frv2_114795	yes	yes	0.059988	81.017	168600000	1509100	2187500	2469300	7042900	8028100	352600	116900	157400	495900	674700	570060	0	217130	343650	196360	133580	0	109090	2405000	1857800	657820	202200	118000	122500	309380	105030	43971	1492000	794870	835820	211790	311430	0	0	0	0	2616300	2203100	992020	358620	999980	294560
LAIEDYPFANDGLLIWDAIK	frv2_114795	frv2_114795	yes	yes	0.00029945	82.755	1367600	12944	18038	0	0	0	27316	0	0	18140	67677	0	0	0	0	0	0	0	31448	0	0	0	0	0	0	0	0	0	105180	19330	0	0	0	0	0	0	0	0	0	0	0	0	0
NDLGMSNYPMVPGHEVVGEVLEVGSNVTR	frv2_114804	frv2_114804	yes	yes	4.9496e-28	114.85	21313000	92914	0	0	0	811240	0	0	0	205550	0	0	76726	85365	120240	121540	102410	0	0	0	1124300	0	0	0	0	0	0	0	0	0	173990	0	0	0	0	226900	0	0	792760	407320	0	0	279370
TTVGLAATDPSGILTPYTYTLR	frv2_114804	frv2_114804	yes	yes	3.4862e-12	113.78	22417000	52760	93033	154940	360520	842880	98195	27448	0	118910	97968	255920	116250	121690	183960	125870	138050	0	115020	133320	319390	155320	68311	26967	83701	304110	0	0	110100	102330	0	202430	0	0	315620	142330	358130	0	571400	344720	285980	98821	247150
ELYLTGESYAGHYIPQLANAILDYNAR	frv2_114807	frv2_114807	yes	yes	3.9376e-17	109.84	12327000	0	0	0	0	0	114700	0	0	0	0	0	0	119250	122380	119670	157500	0	97295	0	0	0	0	0	0	181130	0	0	0	0	0	299630	0	0	310010	0	0	0	408560	0	374290	0	0
GQVGGWATEYGNLLTFATVR	frv2_114807	frv2_114807	yes	yes	5.3811e-30	148.44	7943900	0	0	0	0	0	78350	0	0	0	0	0	0	109860	128150	112580	129220	0	68183	0	195210	136120	0	0	0	87224	0	0	0	0	0	223580	0	0	294350	0	0	0	0	138460	177890	0	102100
GVAIGNPLLNLDR	frv2_114807	frv2_114807	yes	yes	0.0013254	90.759	999280	0	0	0	0	0	0	0	0	0	0	0	0	0	0	0	0	0	0	0	0	0	0	0	0	0	0	0	0	0	53686	0	158810	0	227450	0	0	0	0	0	0	190930	0
ITVPYGAWFHK	frv2_114807	frv2_114807	yes	yes	0.050855	83.883	919410	0	0	0	56678	0	0	0	0	0	0	0	14142	13707	0	14877	27690	0	0	0	0	0	0	0	0	0	0	0	0	0	0	0	0	0	0	0	0	0	0	0	0	0	0
IVQNHIPVWVFSGDQDSVVPLLGSR	frv2_114807	frv2_114807	yes	yes	5.7166e-06	80.002	12855000	0	0	0	0	941260	0	0	0	0	0	0	162780	0	0	456120	0	0	0	0	0	552900	0	0	0	0	0	0	0	0	0	0	0	0	0	0	0	0	825640	0	0	0	0
TNLPYPWSMCSR	frv2_114807	frv2_114807	yes	yes	0.091424	38.238	24312000	140630	37696	12534	42770	0	165510	83260	450070	130590	28323	29037	0	0	59589	0	10670	0	0	0	97955	0	310580	0	158700	0	0	29092	0	0	0	0	0	0	0	0	0	144630	125420	63861	282560	1742600	270760
VLSSPDVQSDQPSATHVNQNQLLNLTSSEGR	frv2_114827	frv2_114827	yes	yes	0.00039242	50.593	1775700	0	0	0	0	0	0	0	0	0	0	0	0	0	76654	0	0	0	0	0	0	0	0	0	74092	97146	0	0	0	0	0	72367	211990	0	0	0	0	0	0	0	0	0	0
NLNTLIQIITS	frv2_115136	frv2_115136	yes	yes	0.00039659	122.55	2574500	20521	0	32923	67135	107960	25485	0	0	15473	0	0	19730	30135	47350	24274	28985	0	18511	0	0	0	7548.8	0	30161	49989	23742	0	0	0	0	61222	42054	0	84632	0	31972	0	0	0	24021	0	0
SLHVAVLAFPYGTHAAPLLSLVTK	frv2_115136	frv2_115136	yes	yes	4.5805e-23	127.07	1804600	0	0	0	0	0	0	0	0	0	0	0	0	0	0	0	58542	0	0	0	0	0	0	0	0	0	0	0	0	0	0	0	0	0	0	0	0	0	0	0	0	0	0
SNATLFSSSNEFHLPNIK	frv2_115136	frv2_115136	yes	yes	0.00064936	82.865	11354000	0	34827	0	0	0	51358	13361	0	128990	0	87522	80569	95978	128120	91957	70648	0	75523	0	187220	270580	27843	0	64476	199570	146190	46208	0	0	0	276670	118470	0	364360	270350	56268	0	0	0	109260	130730	0
DIVALSGAHTLGR	frv2_115141	frv2_115141	yes	yes	0.00096272	92.906	3996700	0	19499	0	53531	195640	27508	5917.5	0	17705	9894.5	0	0	0	0	0	0	0	0	46890	60033	21638	0	0	21290	17596	28590	0	0	17331	0	0	78195	0	55629	40177	0	53094	80194	30519	0	64566	37910
FDNSYFEILLEEDSAGLLK	frv2_115141	frv2_115141	yes	yes	1.6836e-28	148.19	1741700	0	0	0	0	0	19713	0	0	0	0	0	0	0	0	0	0	0	0	0	0	0	0	0	0	0	0	0	0	0	0	0	0	0	71048	0	0	0	0	0	0	0	0
HYVELYAK	frv2_115141	frv2_115141	yes	yes	0.0055279	101.43	980670	3709.2	0	0	0	0	5139.8	0	0	7757.4	0	0	0	0	0	0	0	0	0	12366	0	14391	7715.7	0	0	10980	13004	4872.1	14943	0	11980	11463	40388	0	46409	21148	11860	7725.6	0	6792.7	0	23625	6781.7
HYVELYAKDEDAFFR	frv2_115141	frv2_115141	yes	yes	0.015374	63.292	435100	0	0	0	0	0	0	0	0	0	0	0	0	0	0	0	0	0	0	0	0	0	0	0	0	0	0	0	0	0	0	0	0	0	209050	0	0	0	0	0	0	0	0
ISYADLYQLAGVVAVEVTGGPTVNFVPGRR	frv2_115141	frv2_115141	yes	yes	1.8806e-58	141.69	21236000	0	175260	342970	721970	1748500	59993	0	0	22019	195460	199860	15654	46969	0	18926	117250	0	53547	299230	0	91695	0	0	0	118310	0	0	171610	0	0	67554	0	0	114050	0	42253	0	330160	122280	59116	0	0
KLSELGFVPSSK	frv2_115141	frv2_115141	yes	yes	0.00036415	111.66	2906200	7339.1	0	0	0	80241	9665.9	0	0	7845	16408	9418.3	8864.1	6874.5	25477	9813.3	10733	0	11533	51215	30525	22978	0	0	11289	39176	20342	0	32214	0	12518	35869	53064	0	0	38773	0	0	45913	0	33371	31437	23883
LAWHDAGTYDATSK	frv2_115141	frv2_115141	yes	yes	0.009248	70.68	759560	0	0	0	0	0	8003.9	4533.5	6773.9	10279	0	4763.9	0	0	11806	5068.6	0	0	0	26374	12502	0	15836	0	0	0	23101	0	0	11372	0	0	0	0	0	0	0	0	0	0	0	0	0
LSELGFVPSSK	frv2_115141	frv2_115141	yes	yes	1.0822e-07	132.56	9553500	37998	66721	65449	150190	206480	0	13344	15928	0	34774	40652	35704	24373	50870	28485	30117	0	0	0	84967	0	71808	0	34032	83896	55816	0	70873	29224	0	0	162350	0	187810	0	63111	67201	110190	82261	125470	144980	102430
MGLTDKDIVALSGAHTLGR	frv2_115141	frv2_115141	yes	yes	2.6064e-70	193.41	35170000	0	92203	135390	233580	1062600	167370	46449	24690	125520	175920	107530	106280	151860	309530	108510	126260	0	148710	495850	454670	261220	109880	34143	146420	399040	142030	50028	385190	75696	118070	300390	815220	0	818580	544410	156840	80287	451450	214500	257960	553760	173950
SGFDGAWTEDPLKFDNSYFEILLEEDSAGLLK	frv2_115141	frv2_115141	yes	yes	0.0071539	39.978	553400	0	0	0	0	0	0	0	0	0	0	0	0	0	0	0	0	0	0	0	0	0	0	0	0	0	0	0	82535	0	0	0	0	0	0	0	0	0	0	0	0	0	0
TAGIMMEHIEGLEVR	frv2_115202	frv2_115202	yes	yes	0.0012873	85.006	812590	0	0	30438	0	0	0	0	0	47962	0	0	0	0	0	0	0	0	0	0	0	0	0	0	0	58822	107900	0	0	0	0	0	0	0	0	0	83761	0	0	0	0	0	0
YLTATIHLR	frv2_115202	frv2_115202	yes	yes	0.0016086	107.57	1447000	0	0	0	0	27871	8871.9	0	0	26791	0	0	3685.2	0	20598	0	11392	4417.4	29609	0	0	0	0	0	0	44210	24034	29801	0	0	0	35017	0	0	66749	42124	66357	0	0	10336	0	0	21376
YYDPLWWGR	frv2_115202	frv2_115202	yes	yes	0.0097902	83.948	1636500	0	0	0	0	0	0	0	0	37131	0	0	17701	0	0	25293	21034	0	0	0	0	0	0	0	0	0	69859	30898	0	0	0	0	0	0	0	0	90137	0	0	0	0	0	0
MAELDPDPFWVENR	frv2_115230	frv2_115230	yes	yes	0.0016583	100.22	34494000	0	0	0	0	0	0	108510	185170	527010	0	0	0	0	0	0	0	0	0	0	0	0	55408	72106	164250	0	164060	0	0	0	0	0	250840	0	0	0	0	0	0	0	248360	0	590850
CNVLVNIEQQSPDIAQGVHGHLSK	frv2_115233	frv2_115233	yes	yes	0.083511	29.842	759080	0	0	0	0	0	0	0	0	0	0	17579	0	27548	70262	0	0	0	29345	0	30010	0	0	0	0	0	0	0	0	0	0	0	0	0	92927	0	0	0	0	0	0	0	0
TIVAEYGQTILDLLLSEAQPR	frv2_115242	frv2_115242	yes	yes	5.1626e-97	197.94	6596100	0	20656	10218	28980	188530	0	0	0	46171	0	54407	0	24718	4667.2	0	53489	0	72270	0	0	85774	0	0	0	96319	0	45385	0	0	18191	26358	0	0	61607	72213	26541	0	163560	56630	22635	0	0
FVEVDEEQSR	frv2_115271	frv2_115271	yes	yes	0.012931	75.652	329770	3151.9	0	8072.1	42340	47042	0	0	0	0	0	0	0	0	0	0	0	0	0	17572	11508	4614.2	0	0	0	0	0	0	0	0	0	0	0	0	0	0	0	0	0	0	0	0	0
GFVPFSQMSTK	frv2_115271	frv2_115271	yes	yes	0.0066301	84.821	2762500	0	0	22721	0	80260	0	0	28052	0	33915	39242	22657	15939	57359	0	0	0	0	0	29620	0	58238	21114	0	0	0	0	40823	13920	181440	0	0	0	75425	0	30065	79699	34220	0	0	0	0
HVEDVGIVSGVK	frv2_115271	frv2_115271	yes	yes	0.042	56.205	180290	0	0	0	0	0	0	0	0	0	0	0	0	0	0	0	0	0	0	25308	13880	0	0	0	0	0	0	0	16369	0	0	0	0	0	0	0	0	7009.2	0	0	0	0	0
IIGTVFATETSGAFVDITSK	frv2_115271	frv2_115271	yes	yes	1.6267e-06	103.45	8050300	119270	92108	0	0	155810	82668	7363	0	0	163540	0	0	75544	119280	61795	0	0	0	317320	116580	84120	0	0	0	0	0	0	0	56503	0	108880	0	0	85793	0	0	0	0	0	0	61849	0
ISDIETVLQPGDVLK	frv2_115271	frv2_115271	yes	yes	3.891e-38	191.63	50438000	549820	678890	678780	1534600	1324400	0	0	0	0	331250	216680	0	0	0	0	0	0	0	1998100	553920	420990	0	0	0	0	0	0	905320	315800	323000	0	0	0	0	0	0	880170	983720	409410	0	0	0
KLEPTPGDMIR	frv2_115271	frv2_115271	yes	yes	0.016925	89.561	1496600	23321	27873	20729	84433	92908	0	0	0	0	24106	0	0	0	0	0	0	0	0	110050	0	0	0	0	0	0	0	0	53239	24801	23784	0	0	0	0	0	0	0	0	0	0	0	0
NPTLVFEKAEEMAQTFR	frv2_115271	frv2_115271	yes	yes	2.0115e-96	213.69	18234000	114040	271810	297190	798570	2065100	73140	14866	0	0	301880	201330	92085	67327	366940	78273	48557	0	30188	597110	230540	74126	0	0	0	99458	29599	0	0	64677	90215	94554	0	0	0	0	0	208920	225190	131960	0	0	0
QLQAEDAVVK	frv2_115271	frv2_115271	yes	yes	0.03724	62.166	134860	0	9928	0	25892	0	0	0	0	0	0	0	0	0	0	0	0	0	0	0	5667.9	0	0	0	0	0	0	0	0	0	0	0	0	0	0	0	0	0	0	0	0	0	0
SLQYDLAWER	frv2_115271	frv2_115271	yes	yes	0.00088936	120.57	14869000	142960	266670	208080	571320	519760	34658	0	21719	0	172980	112790	65292	66516	88392	33602	25237	0	25363	525720	127210	67808	47219	23779	0	52687	0	0	179280	88096	84999	41618	63757	0	78920	81040	45550	232590	137590	79382	0	67124	45687
SPGEEVIEMEIPLK	frv2_115271	frv2_115271	yes	yes	4.2705e-17	161.04	13418000	349510	244410	111220	437100	263350	0	19823	0	0	74972	40565	24839	0	0	38761	0	0	0	641170	216510	149980	0	0	0	0	0	0	188530	144020	112580	61357	0	0	122760	144790	66594	260700	182270	92373	0	0	0
SPGEEVIEMEIPLKFVEVDEEQSR	frv2_115271	frv2_115271	yes	yes	3.0936e-39	142.27	11338000	67848	252710	324440	361730	0	0	0	0	0	458770	507910	100120	230830	414420	170360	116260	0	0	0	0	0	0	0	0	0	0	0	0	0	0	0	0	0	0	0	0	119260	0	0	0	0	0
STAYLPLR	frv2_115271	frv2_115271	yes	yes	0.0017957	109.01	7965300	60574	104660	84584	273420	206720	21212	9412.7	8062.3	13643	78959	60693	28729	0	42716	25690	22045	0	0	265970	62920	0	37161	16986	0	12864	0	0	121970	65319	64576	0	111200	0	48221	41002	24042	146280	85646	29237	0	50324	0
TAPMEGVSFTLDQFTGAIENYDFESEIGAK	frv2_115271	frv2_115271	yes	yes	1.9677e-05	62.107	13357000	111320	120170	175580	312810	388750	136910	0	0	0	270130	238300	22298	77013	23549	0	62332	14090	0	741760	320660	197760	45310	0	0	76706	0	0	225540	0	231950	0	0	0	93593	128540	0	0	213240	0	0	0	0
VMILSHDR	frv2_115271	frv2_115271	yes	yes	0.0023458	122.52	1427700	16827	21574	15202	50515	44968	0	0	0	4443.8	11049	0	0	0	0	0	0	0	0	98122	32396	18157	0	0	0	0	0	0	43082	17368	17387	14641	0	0	0	0	0	34412	0	9511.9	7882.7	0	0
VMILSHDRER	frv2_115271	frv2_115271	yes	yes	0.013965	86.898	1248300	0	0	0	67306	98560	0	0	0	0	53130	24174	16889	18047	16377	13909	7717.8	0	10009	0	0	0	0	0	0	0	0	0	19725	0	21852	0	0	0	0	0	0	0	0	0	0	0	0
AGLNVDIAPDLIANQLNVR	frv2_115295	frv2_115295	yes	yes	4.9613e-44	159.4	8225500	93921	101970	100920	271760	469410	0	0	0	0	143360	70268	22537	0	0	0	0	0	0	0	145520	0	0	0	0	0	0	0	208490	48619	0	0	0	0	0	0	0	131210	125620	0	0	0	0
RIVPQLIQFGK	frv2_115295	frv2_115295	yes	yes	0.033018	117.52	411360	0	0	0	0	0	0	0	0	0	0	0	0	0	0	0	0	0	0	0	0	0	0	0	0	0	0	0	0	0	0	0	0	0	0	0	0	0	0	0	0	0	0
ANVTDEMVDAFMAVRPLPYMFD	frv2_115395	frv2_115395	yes	yes	0.0014092	76.492	5110200	0	0	0	0	141350	18917	0	0	19602	32490	67369	8599.2	38159	42573	18251	84420	0	55219	0	0	0	0	0	0	132110	0	0	34939	0	0	33712	0	0	69508	0	63115	0	44189	43513	0	0	0
EQEDEQVVTPWEVSGK	frv2_115395	frv2_115395	yes	yes	0.058452	43.042	6389100	0	0	0	0	0	97921	0	8449.6	49604	0	0	10339	21237	77566	14940	0	0	0	0	0	0	155720	76347	125640	191550	257310	32471	0	0	0	67860	410320	0	0	0	0	0	0	0	141150	91931	70463
TAIGVLGDLADTLGSNAGSLIQQSLSSR	frv2_115428	frv2_115428	yes	yes	6.1879e-47	133.29	4074200	0	0	0	0	0	0	0	0	0	0	71392	0	0	0	0	43715	0	21463	0	114510	114340	0	0	0	73029	0	0	0	0	34372	41272	0	0	148980	111120	0	0	90199	0	0	0	0
AAVLGFVGAPFTLASYVVEGGSSK	frv2_115449	frv2_115449	yes	yes	1.4121e-114	203.64	52579000	436650	527080	608750	1347000	2651400	47245	0	0	83623	538480	402470	146140	152280	189850	110970	95962	0	61835	2233100	418310	371530	0	0	0	114360	32914	0	740570	184170	182820	153780	0	0	139160	0	84264	496870	908990	235250	101780	0	57519
EFIPEESVPYVGEALSILR	frv2_115449	frv2_115449	yes	yes	2.6781e-06	107.65	21285000	199360	153230	229390	346560	485080	50552	0	0	38531	187620	158050	0	0	0	0	0	0	62191	1135200	301270	0	0	0	0	0	0	49473	436800	110880	0	0	0	0	0	0	0	276800	469450	214050	246570	0	0
EFIPEESVPYVGEALSILRK	frv2_115449	frv2_115449	yes	yes	0.017923	53.565	3925100	54244	67754	123620	126630	381300	0	0	0	0	140100	107970	0	47487	0	0	0	0	0	215070	0	0	0	0	0	0	0	0	0	0	0	0	0	0	0	0	0	0	0	0	0	0	0
GKGPVIFDPVYSAGQVDQVR	frv2_115449	frv2_115449	yes	yes	5.4374e-44	161.97	35015000	291760	249950	232330	673740	1418600	37216	0	0	44363	518190	250570	177100	128360	143570	67959	78448	0	58067	1741000	487850	104370	0	0	27086	95941	0	0	461590	150790	201380	124880	0	0	198550	0	0	594830	498010	183040	0	0	0
GPVIFDPVYSAGQVDQVR	frv2_115449	frv2_115449	yes	yes	3.8505e-58	193.19	23793000	204420	195350	201070	578450	725370	0	0	0	0	286120	160890	0	0	0	0	0	0	0	1002400	304670	213290	30150	0	0	0	0	0	337980	150890	72231	0	60216	0	0	123320	75505	382280	299220	86451	0	115050	0
HILNLGHGIVVGTPEENVAHFFEVAK	frv2_115449	frv2_115449	yes	yes	4.5962e-30	127.1	3945900	0	0	0	0	0	0	0	0	0	0	0	0	0	0	0	0	0	0	981890	0	0	0	0	0	0	0	0	121350	0	0	0	0	0	0	0	0	0	0	0	0	0	0
ILHSLLQK	frv2_115449	frv2_115449	yes	yes	0.00081277	134.48	3732500	39195	60420	66720	229310	221270	0	0	0	0	0	0	0	0	0	0	0	0	0	280340	78016	29216	0	0	0	0	0	0	131020	36271	36256	0	14556	0	0	0	0	80070	28433	0	0	0	0
LGPNVAIQGNVDPGVLFGSK	frv2_115449	frv2_115449	yes	yes	1.7616e-82	197.05	49988000	472620	515030	710720	1330400	1421600	63828	0	0	80553	567020	370770	105060	190000	99239	56834	93530	0	60658	1946800	665320	359480	0	0	0	132920	0	0	683040	227220	86515	0	0	0	0	0	0	461330	680870	278700	168590	0	69855
RLGPNVAIQGNVDPGVLFGSK	frv2_115449	frv2_115449	yes	yes	1.097e-23	135.18	9131900	73459	92468	137840	245310	445870	0	0	0	0	172310	0	41847	41270	0	29529	0	0	0	370520	141680	0	0	0	0	0	0	0	181290	32414	0	0	0	0	0	0	0	153010	191450	0	0	0	0
SHPELPLILYASGSGGLLER	frv2_115449	frv2_115449	yes	yes	4.9298e-38	150.9	22028000	168950	205920	154760	620500	1114000	0	0	0	0	384850	246370	93468	117190	40141	24260	57403	0	27608	1357100	420380	212720	0	0	0	0	0	0	390250	122580	0	53426	0	0	0	0	0	149920	225660	74027	0	0	0
VFKPDGVILFSDILTPLSGMNIPFDIVK	frv2_115449	frv2_115449	yes	yes	5.338e-38	129.4	93156000	565720	1513600	1733600	4479000	5924400	17849	0	0	0	1679100	1082800	67573	94768	24239	12678	101590	0	44021	5970600	734500	662450	0	0	0	0	0	0	1833400	0	0	65680	0	0	0	0	0	53726	1034600	221570	49838	0	0
YIQYQADNGAQAVQIFDSWATELSPVDFEQFSLPYLK	frv2_115449	frv2_115449	yes	yes	0.024093	27.181	3062900	13107	37464	90234	198560	237240	0	0	0	0	45138	64090	0	0	0	0	0	0	0	648320	178900	0	0	0	0	0	0	0	103610	0	0	0	0	0	0	0	0	0	98761	0	0	0	0
GSGSASQGEVSFLSWNSK	frv2_115505	frv2_115505	yes	yes	3.1257e-07	113.14	6000200	0	0	0	0	0	88062	0	0	78825	0	69780	0	0	0	65984	56251	0	73313	0	0	91233	0	0	0	223280	0	0	0	0	0	0	0	0	0	219200	0	0	184850	0	0	0	161480
IPGVISASSFDGK	frv2_115505	frv2_115505	yes	yes	0.00049194	101.39	12695000	0	0	42798	0	297320	0	0	24521	60013	21279	0	30017	0	0	38937	61145	0	54326	0	165860	158740	0	42551	0	97677	0	27303	61493	29614	103150	134840	249290	0	340890	281450	139530	61480	222030	155800	190950	184790	147160
LVSFHPGTSAGASEVYVHNMVTEDGLVSR	frv2_115505	frv2_115505	yes	yes	1.5007e-22	111.33	21342000	0	0	0	0	0	124760	0	0	159320	0	0	57265	63031	148940	66536	102510	0	139390	0	357800	300440	0	0	0	309960	186860	150550	0	0	0	431290	392450	0	777120	449400	213630	0	311170	187930	383210	439960	352660
IKNLDQNLGALSVK	frv2_115535	frv2_115535	yes	yes	0.0026557	100.18	402900	0	0	0	0	0	0	0	0	0	0	0	21695	26168	63763	13766	33368	0	26630	0	0	0	0	0	0	0	0	0	0	0	0	0	0	0	0	0	0	0	0	0	0	0	0
NLDQNLGALSVK	frv2_115535	frv2_115535	yes	yes	4.6402e-18	185.2	8504800	0	0	38070	122730	159240	27051	20171	17230	44634	20616	44461	41206	40537	97872	49217	29217	0	42474	98407	101540	65214	103380	51637	46957	112850	80418	33660	0	32615	53507	90638	217100	0	205410	170320	104110	32632	112830	73460	78933	167150	85026
YYNGLDHFSWK	frv2_115535	frv2_115535	yes	yes	0.00038178	115.92	6479900	0	0	26437	0	93475	35188	0	0	23614	68363	32844	29110	46577	86583	31793	30161	0	35300	257310	106730	66558	0	0	0	54845	0	0	0	0	21429	55303	476430	0	414450	62163	0	0	0	0	75703	0	52460
YIDTHFEGPSLFPNGSPDKEFAEEMISYTDTFSK	frv2_115543	frv2_115543	yes	yes	1.1586e-10	82.211	533420	0	0	0	0	0	0	0	0	0	0	0	0	0	0	0	0	0	0	0	0	0	0	0	0	0	0	0	0	0	0	0	0	0	0	0	0	0	0	0	0	0	0
AAELAVSSLQALLQR	frv2_115573	frv2_115573	yes	yes	4.2234e-15	153.14	12203000	0	0	35002	174940	223500	53341	8245.2	0	73059	0	69276	65162	60443	0	62833	68114	6883.8	0	0	247360	112970	26737	0	48519	75174	57016	55785	0	27990	0	135280	134380	0	152390	94988	66827	112120	303700	116540	174260	151830	75833
SAVFPLQLLGFDVDPIHSVQFSNHTGYPSFK	frv2_115573	frv2_115573	yes	yes	0.022905	33.885	80353000	0	0	0	0	0	0	0	0	0	0	463240	669690	1025100	1426100	1753700	1922800	0	3253300	0	0	0	193680	54974	405870	0	0	0	0	0	0	0	1201800	0	0	0	0	0	1606500	0	0	0	0
VLSIQSHTVQGYVGNK	frv2_115573	frv2_115573	yes	yes	6.649e-05	101.45	14583000	0	14334	0	0	199730	72748	22845	34313	68367	35013	36514	50430	61838	138910	55865	39440	0	43508	88473	125810	106740	121650	52244	83952	167690	102950	19777	61497	49669	87499	234800	368770	0	263010	298640	103950	23791	88476	113500	120180	230690	162240
IEVIGQIR	frv2_115597	frv2_115597	yes	yes	0.027854	78.77	563710	0	0	0	0	0	0	0	0	0	0	0	0	0	0	0	0	0	0	0	0	0	0	0	0	0	0	0	0	0	0	0	0	0	0	0	0	0	0	0	0	0	0
LDIGENSSDSNLSVPIVDLQDIHINPASR	frv2_115597	frv2_115597	yes	yes	2.462e-20	103.36	2109100	0	0	0	0	0	0	0	0	0	0	0	0	0	0	0	0	0	43849	0	0	0	0	0	0	0	0	0	0	0	0	0	272430	0	533740	266530	219630	0	0	0	0	0	0
EAGYAVQLSNKPLLDVRPSNEHNK	frv2_115600	frv2_115600	yes	yes	0.0024466	66.448	3067600	39234	0	0	63050	210750	0	0	0	0	62474	45327	13721	21284	46466	0	0	0	0	295010	78992	33441	0	0	0	0	0	0	74498	0	0	0	0	0	0	0	0	0	139700	45965	36215	0	0
FAGIGGVSEFLGWTDQQR	frv2_115600	frv2_115600	yes	yes	3.9987e-06	110.26	3426700	90336	38695	70393	0	0	0	0	0	0	0	0	0	0	0	0	0	0	0	407170	123000	0	0	0	0	0	0	0	0	57998	0	0	0	0	0	0	0	123310	0	0	0	0	0
GSTWIPIFDVDNGLDIGTIPR	frv2_115600	frv2_115600	yes	yes	1.8443e-55	160.05	8247800	106460	106020	87462	149510	379900	0	0	0	0	133610	119210	22873	30477	42541	10159	0	0	0	465900	71536	0	0	0	0	0	0	0	178150	61721	0	0	0	0	0	0	0	49102	196200	84228	0	0	0
ADWLVFNFQDLINSLG	frv2_115636	frv2_115636	yes	yes	7.0843e-06	110.84	466000	0	6298.6	0	34297	0	0	0	0	0	0	0	0	0	0	0	0	0	0	49484	31207	8952.3	0	0	0	0	0	0	14055	0	0	0	0	0	0	0	0	0	0	0	0	0	0
INGNASQEDVFTQIDASLTTLLEQR	frv2_115736	frv2_115736	yes	yes	0.00057411	58.373	376630	0	0	0	0	0	0	0	0	0	0	0	14329	0	0	0	0	0	0	200310	0	0	0	0	0	0	0	0	0	0	0	0	0	0	0	0	0	0	0	0	0	0	0
KYDLVHVAAGDLLR	frv2_115736	frv2_115736	yes	yes	0.041977	55.176	3519900	17368	55612	36836	106160	235060	0	0	0	0	41567	0	25264	21260	64352	11832	12813	0	11881	178420	0	0	0	0	0	0	0	0	0	0	0	0	0	0	0	0	0	88984	0	0	0	0	0
IEHTDVPLSYYTGILGMPGITAYGGFFELGTPK	frv2_115747	frv2_115747	yes	yes	0.00012415	54.097	100810	0	0	0	0	0	0	0	0	0	0	0	0	0	0	0	0	0	0	0	0	0	0	0	0	0	0	0	0	0	0	0	0	0	0	0	0	0	0	0	0	0	0
NLANPTALLLSSVSMLR	frv2_115749	frv2_115749	yes	yes	5.9828e-40	174.68	14689000	36992	83222	99706	299270	464770	54285	0	0	28963	59033	88608	57912	58331	96120	83831	63295	0	42256	122500	201140	148170	0	0	0	153080	48796	0	0	36251	0	138200	33451	0	180110	0	57536	0	185840	87580	155150	0	75184
QIFQAAEAPIEWEEHYVGTEVDPR	frv2_115749	frv2_115749	yes	yes	4.6412e-06	84.159	12210000	0	0	0	0	0	0	0	0	0	0	0	0	0	0	0	0	0	0	0	312090	0	0	0	0	361530	297810	0	0	0	0	339550	218450	0	655360	272980	120580	0	281570	237000	347840	184250	271530
TADLGGISK	frv2_115749	frv2_115749	yes	yes	0.065853	47.706	15711000	51243	131250	110670	527720	366440	85322	32732	73871	130450	0	0	35386	11960	43079	0	33261	0	0	0	71766	29494	38145	18203	28836	40687	46784	22743	0	60305	154110	0	0	0	0	0	0	121050	313700	130120	221960	421020	231690
GFNEQPLDILGSLSLSPIVR	frv2_116017	frv2_116017	yes	yes	2.3429e-70	190.79	14167000	0	66425	69320	197140	352910	105820	0	0	71983	51387	102600	63897	119210	229940	161000	90047	0	58265	0	141250	0	0	0	51243	281020	45940	0	82506	34342	95360	154990	0	0	233170	130210	78991	51053	0	122690	242210	0	118490
QVFSVADLSSALNDDGRAELINALK	frv2_116017	frv2_116017	yes	yes	0.00027733	65.149	6494100	0	0	0	0	0	112370	0	0	0	0	121490	113960	133120	356910	139330	103080	0	0	0	0	0	0	0	0	249270	0	0	0	0	0	215460	0	0	188950	0	0	0	215090	0	0	0	0
GGGGYIPATGDNLNLLSELSNAAAVR	frv2_116039	frv2_116039	yes	yes	0.003481	62.735	3766900	0	0	0	0	0	47598	0	0	57799	0	0	0	29434	107740	0	0	0	0	0	0	0	0	0	0	145200	109100	0	0	0	0	0	0	0	120880	0	0	0	0	80807	0	132730	74484
GTTGEAIVSPLSQSVK	frv2_116039	frv2_116039	yes	yes	0.067572	48.729	1817300	0	0	0	0	0	12582	0	0	22992	0	0	0	10112	0	14582	8896.9	0	0	0	30807	0	34825	34409	18760	52744	52805	0	0	0	0	0	94919	0	56395	53325	29993	0	0	28896	0	41826	0
QMGVTPTGQNPNLFR	frv2_116039	frv2_116039	yes	yes	0.0043135	74.133	4158900	0	0	0	83898	0	28643	14550	23695	34333	0	0	0	20700	50067	23134	0	0	16777	0	0	0	56590	46862	58286	84103	68830	22781	0	0	34799	53668	158620	0	98491	127710	48450	0	0	43030	63508	126230	84457
WGKPTYSSPASSSNSTFQNPVNGVAK	frv2_116039	frv2_116039	yes	yes	0.00028769	63.522	713560	0	0	0	0	0	0	0	0	0	0	0	24281	0	0	0	0	0	23707	0	0	0	0	14903	0	0	0	0	0	0	0	0	137070	0	0	0	0	0	0	0	0	0	0
VMIQSTHSSILK	frv2_116117	frv2_116117	yes	yes	7.6996e-05	112.02	783640	0	0	0	0	31423	4398.6	0	0	0	0	6742.6	0	4489	0	0	6265.7	0	0	0	26694	14716	0	0	0	0	0	0	0	0	0	22538	49525	0	0	0	0	0	0	0	0	0	0
NVTEVQPQFDVVVK	frv2_116158	frv2_116158	yes	yes	8.0524e-13	136.39	13442000	34330	47015	37428	0	313210	93114	32938	31605	0	0	73467	0	0	0	0	0	0	0	97578	194030	196340	0	0	93669	298970	190440	0	0	0	0	0	0	0	794680	623470	319020	0	0	0	287050	0	0
YYVVDAFTDSAFK	frv2_116158	frv2_116158	yes	yes	2.6591e-08	133.16	13709000	0	0	0	0	490800	0	0	0	69812	0	231850	140610	157320	195510	152360	94769	0	122920	0	0	0	0	25367	64720	138100	85245	61214	0	74012	0	217610	309380	0	354280	323780	220580	329520	704620	375020	373710	373600	231590
SSTLSDAIVEHTQILR	frv2_116161	frv2_116161	yes	yes	0.00039853	94.203	2010300	0	0	0	0	0	0	0	0	0	0	0	0	0	0	0	0	0	57431	0	0	0	0	0	0	140110	130270	0	0	0	24361	0	93931	0	221970	153230	0	0	0	0	98886	195650	0
ANYLPYGIDFEGGPTGR	frv2_116176	frv2_116176	yes	yes	2.0432e-39	170.79	44696000	51264	99578	107380	202140	748440	380630	105900	98723	93898	0	64075	172980	422060	1096500	442800	485780	0	129130	0	196120	605590	441200	254750	307650	434680	155120	54883	0	0	186450	846510	1328500	0	879160	768450	145070	0	233440	396380	449680	332780	342490
EETGQQLGDRISFSGQVQNYQK	frv2_116176	frv2_116176	yes	yes	0.00040776	72.676	1698200	0	0	0	0	0	0	13161	0	0	0	0	18124	65198	149680	75475	44671	0	18446	0	0	0	0	0	0	0	0	0	0	0	0	46080	0	0	0	0	0	0	0	0	66056	0	0
ISFSGQVQNYQK	frv2_116176	frv2_116176	yes	yes	4.1238e-45	210.44	14593000	0	19423	16738	78467	104610	93789	21881	38545	25061	0	0	21545	46155	97908	62938	32215	0	15956	0	78404	141210	291870	135870	124870	147320	68568	0	0	0	89924	313740	709020	111140	566000	341400	49399	0	52537	71764	123800	288020	59244
NEHLFWDAFHPTEVGNTVIGK	frv2_116176	frv2_116176	yes	yes	1.4068e-23	130.09	17638000	0	0	0	143540	409200	176620	0	0	0	0	0	0	57434	127870	71677	0	0	0	0	290590	441660	0	0	0	0	0	0	0	0	0	382890	0	0	698530	0	0	0	0	0	317190	349400	0
SLVNQLNNELNDAR	frv2_116176	frv2_116176	yes	yes	1.4734e-28	180.06	9274400	0	0	0	179030	461160	98243	35861	21491	0	0	0	0	0	0	0	75402	0	58658	0	116610	0	110350	40996	62386	175220	49830	0	0	0	76481	239430	325210	0	336750	224480	69130	0	0	0	0	157570	0
TTVDVIAELLGFDGYISPYSTAR	frv2_116176	frv2_116176	yes	yes	6.0112e-113	195.48	18737000	28990	29614	106780	367100	1302500	107980	0	0	16107	0	97446	0	184610	50824	24277	242120	0	46202	0	114140	459640	0	0	24207	227310	0	18939	0	0	117900	192030	0	0	451800	251370	13585	0	178010	77278	25624	0	0
TVSQVVNLLGDEDTAANYLSK	frv2_116176	frv2_116176	yes	yes	1.1168e-96	196.98	42605000	0	0	0	0	1417900	445870	48554	71599	63264	0	38709	103090	255600	810930	226000	259740	0	80840	0	324740	496120	94123	35001	458900	570620	114670	0	0	0	0	876220	1098500	363830	1286000	379990	122930	0	0	279460	508940	467690	263940
ASPSLFDLPLPDPLK	frv2_116233	frv2_116233	yes	yes	1.0063e-13	139.66	6878400	0	38263	23674	0	172030	0	0	0	0	28684	0	0	0	149810	66822	57556	0	44225	0	112360	0	0	0	75446	0	0	58065	0	0	0	0	400920	234580	246990	0	251630	68819	0	141590	215740	278020	167230
ELGLPLYDGGDAADLFYDYVFADVAK	frv2_116233	frv2_116233	yes	yes	5.9507e-23	116.35	5815700	0	0	0	0	0	0	0	0	0	22280	102920	0	39742	0	0	56986	0	23113	114440	151670	121810	0	0	0	122540	0	0	22411	0	55879	71228	0	0	268180	300560	24315	0	348160	31116	0	0	0
GSPLVVSILDGSTLR	frv2_116233	frv2_116233	yes	yes	2.8079e-09	122.33	953780	0	0	0	0	0	0	0	0	0	0	0	0	0	0	0	0	0	0	0	0	0	0	0	0	0	0	0	0	0	0	0	0	0	0	0	0	0	0	0	0	193760	0
QYIAAIADELKGSPLVVSILDGSTLR	frv2_116233	frv2_116233	yes	yes	0.0038535	50.986	1855700	0	0	0	0	0	0	0	0	0	45201	100240	47943	66782	147460	72192	105530	0	50065	0	0	0	0	0	0	0	0	0	0	0	0	0	0	0	0	0	0	0	0	0	0	0	0
SIAAIADEPFFSPETEYEPLQASQILK	frv2_116233	frv2_116233	yes	yes	6.3985e-12	99.923	9147300	0	0	0	0	0	123010	15238	21267	0	0	0	164470	237520	463900	276390	243600	0	144820	0	244900	156410	52321	0	59346	471160	262200	0	0	0	0	349760	0	0	838380	0	198250	0	0	0	0	0	0
LQELNNAVLVLSLTTQLTK	frv2_116332	frv2_116332	yes	yes	8.9348e-07	110.16	4080800	0	46464	55737	149040	179640	0	0	0	0	0	0	0	0	0	0	0	0	0	120810	0	78450	0	0	0	0	0	0	0	0	0	0	0	0	0	0	0	0	144430	0	78211	0	0
SLLHYMLPR	frv2_116332	frv2_116332	yes	yes	0.024003	71.379	1167500	0	0	0	0	0	0	0	0	0	0	0	0	0	0	0	0	0	0	0	0	0	0	0	0	0	0	0	0	0	0	0	0	0	0	0	0	0	0	0	0	0	0
SANPAFNVPVHDDGTVLWK	frv2_116395	frv2_116395	yes	yes	0.013791	53.504	7766100	37784	65413	29611	0	190620	73075	0	0	84985	0	0	29278	36628	47466	28320	29989	0	45901	64126	121580	72860	0	0	0	233390	0	87371	0	0	0	0	0	0	288480	275880	120760	0	111080	57400	88474	0	64099
WLQQEAVSSKPDSWLNDVADFSR	frv2_116395	frv2_116395	yes	yes	4.4215e-08	94.234	10052000	90454	0	0	0	0	0	0	0	0	0	0	117600	90732	0	0	141690	0	117990	0	0	0	0	0	0	0	0	0	113860	0	0	0	0	0	493730	0	0	0	478400	0	0	0	144670
LLGSVLEDQDAALR	frv2_116433	frv2_116433	yes	yes	6.7816e-13	137.73	5924500	0	0	0	0	105330	0	0	0	98401	0	0	0	22413	0	0	0	0	0	0	0	0	30969	0	0	0	0	0	0	0	0	0	0	0	0	169990	66717	0	97915	0	0	0	77448
LNENWPTLFK	frv2_116470	frv2_116470	yes	yes	1.7761e-07	171.67	132350000	250600	381470	437190	967710	2902100	800880	90792	93871	382640	0	98606	136180	153320	286270	270700	383450	6744.9	221650	190350	1210000	1355500	615650	267030	350790	1052400	304440	141600	161060	117100	512600	1448300	2481900	550010	2981800	2097600	592520	161730	798970	732360	1251900	1336000	651830
LNENWPTLFKK	frv2_116470	frv2_116470	yes	yes	5.3047e-09	175.74	59128000	31082	135520	107160	264910	2702300	285430	22423	12590	42728	19623	61311	81572	262350	561810	319220	579100	12394	301650	0	129530	439710	66771	105840	62400	640160	64615	34669	0	29496	332580	742690	814410	0	1135200	727390	292740	55803	160710	483590	268730	78573	200130
DGGYLASMNPLDVAVAR	frv2_116499	frv2_116499	yes	yes	2.5393e-82	205.98	15908000	71055	0	0	170720	0	108400	44778	54033	79140	0	0	36453	26590	37256	50301	68074	0	40382	0	102310	117170	87581	61931	92205	238420	141990	0	0	0	0	176420	209830	0	322370	277450	0	0	150970	0	124730	83112	100670
GYLFNQPEIPPLQLEQGHNDSPADGGESK	frv2_116499	frv2_116499	yes	yes	0.00072726	51.766	5862200	0	0	0	0	0	0	0	0	78745	0	0	0	0	0	0	0	0	0	0	0	0	0	0	0	0	0	0	0	0	0	0	0	0	0	352460	0	0	0	0	0	0	0
ANSDVEPPAAPSIEPSSSVLENEESISQFFIQVASLVK	frv2_116576	frv2_116576	yes	yes	0.0001988	45.842	17031000	155160	128740	103640	362720	542020	0	0	0	0	498020	413530	0	0	0	0	0	0	0	945180	465170	192400	0	0	0	100930	0	0	374680	26366	282700	94354	27817	0	212610	198680	34484	0	451590	85615	40307	0	0
SPAPGEPPFVK	frv2_116576	frv2_116576	yes	yes	0.017428	69.672	458750	9453.6	12185	10278	27250	20024	0	0	0	0	8472.3	0	3886.2	0	0	0	0	0	0	31223	0	0	0	0	0	0	0	0	20650	8647.3	12119	0	0	0	0	0	0	26741	0	10049	0	0	0
SPMAGTFYR	frv2_116576	frv2_116576	yes	yes	0.0002242	167.12	6376500	43526	54830	39642	161040	136890	14919	11637	20550	29380	45326	28541	11486	11544	26076	16330	0	0	8953.2	222530	48453	45871	47003	20292	0	36816	36373	0	93430	44373	50879	30688	87886	0	66402	53103	29627	89384	74959	43601	24246	31238	22973
ALDALSQGYFDQALDLLTEAILLNPHSAILYATR	frv2_116602	frv2_116602	yes	yes	6.4709e-05	56.57	294000	0	0	0	0	0	0	0	0	0	0	0	0	0	0	0	0	0	0	0	0	0	0	0	0	0	0	0	0	0	0	0	0	0	0	0	0	0	0	0	0	0	0
LLSSQVLDPLR	frv2_116640	frv2_116640	yes	yes	0.057641	54.343	2786600	0	0	0	0	0	41790	0	0	26205	0	10976	21568	0	63255	0	17241	0	13319	0	0	0	52167	32085	0	79534	0	0	0	0	0	57599	98962	0	82845	119280	46012	0	0	0	125960	0	44856
TMYFLAEAVHPYDAESENELSFSK	frv2_116640	frv2_116640	yes	yes	0.0076175	46.099	1696100	0	0	0	0	0	0	0	0	0	0	0	0	0	0	60190	0	0	0	0	0	0	0	0	0	221240	62372	0	0	0	0	0	0	0	0	0	0	0	0	0	0	0	0
VSQTGWSEGECNGKGGWFPSGYVEK	frv2_116640	frv2_116640	yes	yes	0.058599	36.217	7224700	0	0	0	0	0	0	0	0	0	0	0	0	0	0	109250	74725	0	259820	0	0	0	0	0	0	0	0	0	0	0	0	0	0	0	0	135140	0	0	0	293860	485470	0	528220
AAIDSLDGIIDTVSASHPILPLVSILK	frv2_116683	frv2_116683	yes	yes	3.4438e-31	129.02	90337000	53671	60827	1287600	5034800	9839900	25279	0	0	86552	121330	186260	19994	112160	44052	65626	296410	0	220930	3564800	150420	244950	0	0	0	189130	155750	0	99122	0	0	182610	0	0	382980	169580	36202	0	2366000	131610	95219	0	0
HDVKPEIEIVPIDYINTAMER	frv2_116683	frv2_116683	yes	yes	6.3815e-43	150.61	104940000	208390	216910	267270	462830	1969000	646140	74999	0	651400	267220	618580	262320	397740	505150	403480	668900	0	684540	1604300	1653700	1114400	0	0	338250	1818500	830550	354100	412580	268150	158660	1062700	490360	0	2484100	1734000	1061700	350680	1526000	1338100	1445200	1151500	1460700
KLVAGSVIGGIK	frv2_116683	frv2_116683	yes	yes	0.0060521	94.402	5106800	19757	24176	24613	95822	176740	15766	6172.9	5419.7	19365	0	9246.8	12544	11964	19910	15426	9658.7	0	0	108360	112750	88009	15072	0	18939	47364	15717	9913.6	73585	15786	52578	68746	98364	0	0	0	0	40484	52388	14951	21675	32753	0
LVAGSVIGGIK	frv2_116683	frv2_116683	yes	yes	0.00026015	147.3	19781000	60171	96689	45735	251830	403680	87926	12852	27707	131300	37133	35790	46415	37622	63772	39857	34762	0	33001	306310	340500	231500	163170	45720	96278	205210	150630	78889	126060	39829	121980	263650	469030	0	471500	394400	182870	98743	197080	52148	89224	165520	69673
LVAGSVIGGIKETQEMIDFAAK	frv2_116683	frv2_116683	yes	yes	5.2278e-17	120.71	8506400	0	0	88869	0	828100	0	0	0	0	130870	127330	110530	104890	213100	0	111520	0	84139	93659	0	0	0	0	0	82109	0	0	0	0	0	0	0	0	0	0	0	0	0	0	0	0	0
LVMVGGVSKPLELPVSSLLR	frv2_116683	frv2_116683	yes	yes	1.7297e-70	191.51	160860000	530860	763980	879630	2579900	5158700	537830	42343	27823	687890	784360	1029500	633370	770940	910990	785120	898130	89129	596130	1969200	2221700	1447800	0	0	243960	1041400	435610	340350	935610	357360	219140	1513300	1348700	0	1927400	1466400	1163600	537760	1428600	788560	698690	867630	458150
LNILVNNVGTNVR	frv2_116697	frv2_116697	yes	yes	1.9089e-08	138.21	21943000	38396	94330	65819	274840	421030	63525	12278	17290	105720	43353	109180	70755	50762	74571	42987	53550	0	69725	227440	304130	190110	59362	32087	61662	145210	90625	81783	121890	54846	113460	186860	183980	0	296880	215310	211980	83465	270330	129620	187110	179020	159800
TPLVEHLIANEEFVNEVLSR	frv2_116697	frv2_116697	yes	yes	1.7828e-51	169.67	17832000	0	0	0	0	0	115000	0	0	140620	72369	144100	94022	105100	127340	102110	89641	0	84613	267120	0	225560	0	0	0	266920	74273	0	0	58484	104400	186060	0	0	224120	0	0	0	0	179210	202570	0	156460
WSLAGFTALVTGGTR	frv2_116697	frv2_116697	yes	yes	2.3277e-09	123.63	14389000	46112	129210	104920	0	279860	81734	0	0	87149	24759	117190	0	81227	135780	63514	66830	0	46920	98030	108210	147490	0	0	0	119290	45941	0	65169	15843	0	116940	0	0	139000	0	118490	0	0	0	98615	19302	66486
SNLNPVWNEEHMLSVPEDYGQLK	frv2_116847	frv2_116847	yes	yes	0.00012961	73.346	8080200	0	0	0	0	0	0	29705	75347	211280	0	0	0	0	0	23270	88387	0	255820	0	0	0	0	0	0	0	197480	115070	0	0	0	88284	114690	0	0	133600	286880	0	0	0	0	0	0
SYHGDTLGAMEAQAPSSYTGFLQQPWYTGR	frv2_116851	frv2_116851	yes	yes	1.6096e-06	65.056	3195500	0	0	0	0	0	0	0	0	0	0	0	0	54631	0	43180	0	0	0	0	0	0	0	0	0	0	65937	0	0	0	0	199470	0	0	0	0	0	0	0	0	0	0	0
SRPLPSWLSQQDINYYASK	frv2_116899	frv2_116899	yes	yes	1.3817e-13	128.94	7719900	0	0	0	0	224420	0	0	0	0	0	0	0	0	0	0	0	0	0	219280	0	0	0	0	0	172450	0	0	0	52466	37234	0	130010	0	425210	0	254010	0	539590	164110	0	0	0
SSWADLAANSAAENAPLPTSVNNATSQPPSRPVYVPPHLR	frv2_117042	frv2_117042	yes	yes	6.3753e-06	55.779	21325000	0	0	0	228630	0	218810	0	0	198970	68845	89767	74771	0	0	158530	137060	0	152710	0	278520	0	0	0	0	503680	230120	106870	109220	0	0	0	495390	0	562400	325860	224050	0	369010	0	376920	293680	370240
VDILSESLPFIQK	frv2_117125	frv2_117125	yes	yes	0.00025609	109.15	0	0	0	0	0	0	0	0	0	0	0	0	0	0	0	0	0	0	0	0	0	0	0	0	0	0	0	0	0	0	0	0	0	0	0	0	0	0	0	0	0	0	0
ASDLGVESIVIGMAHR	frv2_117139	frv2_117139	yes	yes	0.014818	57.034	12001000	0	0	0	0	0	0	9455.2	0	78414	0	55900	29659	18958	58663	31638	46062	0	80014	0	216520	163050	70538	0	88836	263490	128280	50052	77413	41563	68251	332380	448740	0	519840	179430	76341	0	341170	212660	0	176050	120670
EFFLGVWR	frv2_117139	frv2_117139	yes	yes	0.0038329	101.28	2354200	0	0	0	0	0	26638	0	0	28478	0	0	0	0	0	0	0	0	0	0	0	0	0	0	0	0	28948	0	0	0	0	0	0	0	67987	0	71064	0	0	38502	0	88883	0
FGLEGGETLIPGMK	frv2_117139	frv2_117139	yes	yes	0.0021849	83.243	1356300	0	0	0	0	0	0	0	0	0	0	0	0	0	0	0	0	0	0	151090	0	0	0	14277	0	0	0	0	0	37530	0	0	0	0	0	0	159300	0	0	0	0	0	0
IHLSLVANPSHLEAVNPVVVGK	frv2_117139	frv2_117139	yes	yes	2.9404e-33	145.17	10451000	0	51193	50802	172850	370990	21660	0	0	0	55412	35141	31763	42789	73165	41695	43304	0	31410	273410	237490	153520	0	0	34095	45117	0	0	113640	31717	0	118230	200310	0	0	0	0	33297	123350	0	45200	0	0
LAWSSLFENFLATK	frv2_117139	frv2_117139	yes	yes	8.4259e-166	266.85	29574000	80622	171960	215310	553620	938030	72232	0	0	107710	114580	124470	78489	71410	91992	96574	89868	0	75991	377720	401370	341870	0	0	0	225300	0	0	226430	74168	106470	263970	47198	0	488260	0	171270	84345	542000	300180	375350	22471	137770
LNVLGNVVR	frv2_117139	frv2_117139	yes	yes	0.00093999	131.22	5212300	27744	49419	44318	0	155020	0	0	0	11895	27279	30736	22725	14984	21015	14120	14241	0	0	120750	142720	74316	18887	0	0	29353	0	0	93154	0	86352	0	96259	0	0	0	0	53468	87411	22893	0	0	0
MAGFLSENRPVQTLR	frv2_117139	frv2_117139	yes	yes	9.7997e-13	135.91	38904000	32582	120360	94621	199470	426600	144510	34902	27803	64404	78569	198360	159370	78451	140650	108340	126260	0	68095	500690	590410	370350	106080	33594	157690	381460	200530	29274	268500	83104	291540	518460	922410	0	998670	669490	118430	161070	754500	333930	594330	735710	518670
QIPDDLDPALYGFSEADLDR	frv2_117139	frv2_117139	yes	yes	0.033904	70.555	3497600	0	0	0	0	0	0	0	0	0	0	0	0	0	0	0	0	0	0	0	0	0	27475	0	0	0	0	0	0	0	0	0	100500	0	237610	0	86648	0	0	0	0	96254	0
YHLGTSYDRPTR	frv2_117139	frv2_117139	yes	yes	0.00041176	112.94	2569700	0	8189.1	5809.7	29861	51404	9714	0	0	10726	7732.2	0	12417	0	0	0	0	0	0	29177	28228	32018	10271	0	20283	41242	53376	0	14624	13611	22740	76994	62946	0	224610	53548	30527	17660	42982	19449	23509	69784	68401
VSPISLTYYGFCLANGSYTVNLHFAEIMIPDDQTYGSLGR	frv2_117217	frv2_117217	yes	yes	0.044298	19.698	5455100	0	0	0	74348	280380	0	0	0	0	0	0	0	0	0	0	43953	0	0	0	0	0	0	0	0	0	0	0	0	0	0	0	0	0	0	0	0	0	0	0	0	0	0
VSPISLTYYGFCLANGSYTVNLHFAEIMIPDDQTYGSLGRR	frv2_117217	frv2_117217	yes	yes	0.070684	3.7687	114490	0	0	0	0	0	0	0	0	0	0	0	0	0	0	0	0	0	0	0	0	0	0	0	0	0	0	0	0	0	0	0	0	0	0	0	0	0	0	0	0	0	0
DGIMSIWDLADVIK	frv2_117218	frv2_117218	yes	yes	0.0018414	85.287	1466200	0	0	0	0	0	14413	0	0	22483	0	0	12177	0	28914	12144	16170	0	22548	0	0	0	0	0	11700	0	0	0	0	0	0	0	0	0	60047	0	20751	0	63726	16645	20642	0	0
ATGGSSIKDGEVELMLHR	frv2_117283	frv2_117283	yes	yes	0.00090562	79.347	2844400	0	0	0	0	161110	26752	11991	0	11365	0	0	10528	16758	54074	25125	27794	0	22226	0	0	62217	0	0	35239	59387	39722	0	0	0	0	0	65594	0	0	0	0	0	37107	0	0	0	0
DHREDWPLQVTQPVAGNYYPLNLGIYTK	frv2_117283	frv2_117283	yes	yes	1.9284e-69	149.93	26714000	50090	0	0	377940	1310900	182870	0	0	0	0	0	73094	139170	583160	186860	368360	0	153040	0	501250	229230	0	0	0	234090	103700	0	0	0	0	329130	0	0	750960	0	0	0	229610	171090	154470	0	99418
EDWPLQVTQPVAGNYYPLNLGIYTK	frv2_117283	frv2_117283	yes	yes	4.4232e-59	149.18	18295000	0	0	0	0	420640	278680	0	0	111180	0	0	0	27099	48076	141060	43861	0	0	0	437780	396850	0	0	85055	420940	0	0	0	0	0	388430	183670	0	480850	0	90169	0	0	0	0	0	0
GGSVSTSDFVVELGPMEIR	frv2_117283	frv2_117283	yes	yes	1.913e-28	148.15	24359000	0	0	76275	211580	0	270940	35897	37141	113440	0	117150	134690	245050	247240	248160	242970	0	112310	0	242480	271190	85675	59151	244910	570220	263460	0	0	0	0	402430	41691	0	596620	239030	131420	0	187070	231420	279910	0	202370
GNYYISLDNVGAGSR	frv2_117283	frv2_117283	yes	yes	1.0895e-37	185.86	28199000	79530	70297	95641	334130	801890	204400	69858	0	98206	0	83633	97036	170020	331260	212330	179720	0	108590	0	268890	264980	258690	0	176940	296530	186520	0	0	0	188330	308340	616040	0	691400	454920	121890	0	226890	176610	283930	360180	155210
GPLVDEVHQTFSSWIYQVTR	frv2_117283	frv2_117283	yes	yes	5.4743e-10	119.51	16276000	97043	0	188300	450240	1209500	239170	0	0	66969	0	0	0	0	0	181690	183160	0	109460	0	0	329990	0	0	0	0	0	0	0	0	0	255760	0	0	246160	0	47817	0	0	120830	0	0	0
GTIMDPNYSLPPNVALLTLEELDGGIVLLR	frv2_117283	frv2_117283	yes	yes	0.00015292	54.675	12768000	0	50597	86248	248600	333690	28737	0	0	0	0	119070	0	85706	0	0	154160	0	13958	0	310970	302740	0	0	0	110670	0	0	0	0	0	59367	0	0	335110	0	0	0	226810	44428	0	0	0
LAHLYEQSEDAQYSTLAK	frv2_117283	frv2_117283	yes	yes	9.4667e-195	266.29	40354000	61615	63899	81073	343160	704110	225450	95827	91764	110750	0	94012	129530	193960	571550	233840	231630	0	196990	0	262550	354160	262600	89169	189280	540950	241010	58494	33090	64022	236690	362340	866780	0	1166700	763350	147520	0	156560	217390	436360	394600	270640
MTTNMATNKEFYTDSNGR	frv2_117283	frv2_117283	yes	yes	0.062616	45.618	315410	0	0	0	0	0	0	0	0	0	0	0	6087.7	0	24987	0	12220	0	13805	0	0	0	0	0	0	23284	0	0	0	0	0	0	0	0	0	0	0	0	0	0	0	0	0
RTTGQEIYSPLLLAFTHENAENWK	frv2_117283	frv2_117283	yes	yes	7.4169e-05	75.945	2602200	0	0	0	0	0	63155	0	0	0	0	0	43227	67315	75014	87659	82799	0	0	0	0	90397	0	0	0	0	0	0	0	0	0	0	0	0	0	0	0	0	0	76371	0	0	0
TTGQEIYSPLLLAFTHENAENWK	frv2_117283	frv2_117283	yes	yes	5.2458e-17	115.88	44192000	100980	114200	96217	264710	1311100	418850	27826	0	135990	0	197410	185700	373720	619790	514580	508280	0	297140	0	527480	598150	0	0	0	574090	192060	0	0	0	0	749970	276470	0	742580	347780	0	0	407380	325960	509920	394250	215650
GVVVDLTPGPSSMFTFALK	frv2_117298	frv2_117298	yes	yes	0.016787	56.121	4357300	0	0	0	0	246940	0	0	0	0	0	0	0	42787	58483	18386	73240	0	29494	0	135020	91742	0	0	0	104420	0	0	0	0	0	56596	0	0	110180	0	42882	0	0	0	0	0	0
HVEIPVPTPK	frv2_117298	frv2_117298	yes	yes	0.00086844	119.53	3034500	0	0	0	0	0	14588	7527.6	8528	15672	0	0	9453.8	9106.6	26010	12589	14759	0	11521	0	30984	16565	17193	13353	30569	60328	37899	15475	0	10939	21478	45936	67640	0	77509	105490	37047	0	41792	15243	20163	57557	28155
LTHQYGGGLAEFAVASESLTAARPSEVSAAEAAGLPIAGLTAR	frv2_117298	frv2_117298	yes	yes	0.0038469	29.659	18172000	0	0	0	0	0	0	0	0	0	329940	325340	202720	466950	1141900	463370	542570	0	456720	0	707050	0	0	0	0	0	0	0	0	0	0	0	0	0	0	0	0	0	0	0	0	0	0
PSEVSAAEAAGLPIAGLTAR	frv2_117298	frv2_117298	yes	yes	1.7439e-05	94.188	5242700	0	0	0	0	0	61780	0	0	47989	0	0	0	0	0	0	0	0	0	0	85397	56120	50593	25269	32416	50847	76069	0	0	0	0	0	123780	0	164820	181820	0	0	0	0	46145	187110	0
SLGADEVLDYKTPEGVALK	frv2_117298	frv2_117298	yes	yes	4.216e-13	129.46	22935000	31288	0	73007	0	424080	65641	92707	61221	132420	76043	66786	70615	153330	379570	131220	133520	0	192540	114700	76407	73471	172970	114190	220330	419790	287110	61919	0	0	102160	299680	515180	0	572870	519940	233430	81510	119600	77620	274590	148920	183810
EADDLHAVTQHFHGLNR	frv2_117300	frv2_117300	yes	yes	0.046232	44.691	2056900	0	0	0	0	110750	0	0	0	0	28909	27358	0	9733.1	17916	6010.1	4108.3	0	0	177790	45401	46639	0	0	0	0	0	0	52385	0	0	37645	0	0	90493	0	0	42613	0	36766	0	0	0
GAGVVLLYASK	frv2_117300	frv2_117300	yes	yes	0.0099374	76.332	756860	0	20817	0	0	0	0	0	0	0	23675	0	9031.8	0	0	0	0	0	0	59596	17673	19703	0	0	0	0	0	0	43309	0	20863	0	0	0	0	0	0	22436	0	0	0	0	0
LVTAIVGHSK	frv2_117300	frv2_117300	yes	yes	0.00086844	127.83	2232900	12909	0	0	32553	73170	5349.2	0	0	0	0	19444	10280	0	0	0	8785.9	0	0	111540	36398	20919	5618.7	0	0	0	0	0	54390	0	0	22875	23518	0	22281	0	14478	42424	33727	20945	0	0	0
LENTLLDGSSSPQLKICDFGYSK	frv2_117310	frv2_117310	yes	yes	0.026579	44.054	105470	0	0	0	0	0	0	0	0	0	0	0	0	0	0	0	0	0	0	0	0	0	0	0	0	0	0	0	0	0	0	0	0	0	0	0	0	0	0	0	0	0	0
VADVWSCGVTLYVMLVGGYPFEDPDDPR	frv2_117310	frv2_117310	yes	yes	0.016324	37.436	359960	0	0	0	0	0	0	0	0	0	0	0	0	0	0	0	0	0	0	0	0	0	0	0	0	0	0	0	0	0	0	0	0	0	0	359960	0	0	0	0	0	0	0
WDIPVMLAWGLSDK	frv2_117349	frv2_117349	yes	yes	1.7697e-06	119.65	1217600	35697	28800	31745	85032	143560	0	0	0	19833	0	0	0	0	0	0	0	0	0	249940	0	0	0	0	0	0	0	0	125470	23507	0	0	0	0	0	0	0	0	0	0	0	0	0
DFLAHYYAKGLDGTSSSEPFKL	frv2_117361	frv2_117361	yes	yes	0.0013515	75.743	5253700	0	0	0	0	0	0	0	0	0	0	0	0	36063	0	0	0	0	0	0	0	0	0	0	0	0	0	0	180490	53884	0	36819	0	0	0	0	0	0	0	0	61918	0	0
NSNELEESSNFTSVR	frv2_117361	frv2_117361	yes	yes	0.0098845	68.044	114230	0	0	0	0	0	0	0	0	0	0	0	0	0	0	0	0	0	0	0	0	0	0	0	0	0	0	0	0	0	0	0	0	0	0	0	0	0	0	0	0	0	0
GTGEKVDALVSGIGTGGTITGAGK	frv2_117485	frv2_117485	yes	yes	0.0015861	70.593	2702600	0	0	0	0	121700	28520	0	0	32528	0	24417	16223	35552	36625	18400	19673	0	33825	0	0	45503	0	0	27158	80334	33169	30574	0	0	0	52233	0	0	89880	83982	0	0	0	51129	0	0	0
LIITMPTTMSLER	frv2_117485	frv2_117485	yes	yes	0.00089526	94.122	12523000	0	91077	82045	227230	511410	91460	0	0	130520	0	0	0	0	0	74403	53410	0	88559	237570	352440	271330	113740	0	0	225650	94823	0	204780	80633	0	153460	0	0	0	0	248740	0	174100	0	0	194970	0
TPNAYILQQFDNPANPK	frv2_117485	frv2_117485	yes	yes	5.2892e-151	250.38	35569000	62010	0	132310	284950	1108000	188670	68130	53230	367740	131030	199000	184420	168790	280130	190910	180460	0	356200	443730	344030	214350	0	0	0	345740	323660	135150	166250	60231	177930	281560	356830	0	462040	566820	398640	0	218650	238070	223090	321410	273670
VDALVSGIGTGGTITGAGK	frv2_117485	frv2_117485	yes	yes	9.643e-96	206.63	23282000	85656	0	0	0	353340	136260	0	47860	214180	23975	42204	42969	0	0	0	28606	0	58484	338810	358780	256720	196560	66843	123570	238080	309980	144950	184340	0	100520	190350	434350	0	516380	489240	258160	0	205620	116430	160170	0	130960
FYFNSGDTGFK	frv2_117494	frv2_117494	yes	yes	7.6657e-05	155	31977000	76789	100520	124510	344320	463780	0	43825	64022	237700	73815	147720	104560	86101	155000	94502	74875	0	111560	193280	353910	229240	155660	60142	104600	278140	247490	88592	137210	68916	167340	229440	469940	0	548320	451030	284370	126700	464590	234780	222170	308520	229220
SHIPDGPGYEEKFYFNSGDTGFK	frv2_117494	frv2_117494	yes	yes	0.039285	41.615	1548900	0	0	0	0	0	0	0	0	0	0	93974	37921	62086	148650	49952	42344	0	49098	0	0	0	0	0	0	0	0	0	0	0	0	0	0	0	0	0	0	0	0	0	0	0	0
FVLVISGHEK	frv2_117499	frv2_117499	yes	yes	0.070445	53.597	402850	0	0	0	0	0	5983.1	0	0	18884	0	0	0	0	0	0	0	0	9427.7	19956	0	0	0	0	0	0	0	0	0	0	0	0	0	0	0	0	17119	0	11683	0	10769	0	0
LPFLNPMNLLQVEILK	frv2_117499	frv2_117499	yes	yes	0.00023291	98.582	2255400	0	27238	13368	39601	106080	0	0	0	21546	0	0	0	0	0	0	0	0	0	64840	32134	45852	0	0	0	0	0	0	33951	0	0	0	0	0	0	0	0	0	0	0	0	0	0
NVVYENPEFLSYFHEATPEAELGFLNIGSR	frv2_117499	frv2_117499	yes	yes	0.041335	31.054	6490500	0	0	0	0	0	88083	0	0	123000	0	0	0	0	0	0	0	0	0	0	0	0	0	0	0	145100	0	0	0	0	0	110870	0	0	487340	0	61724	0	0	0	0	0	0
ELTEALTPLLQLSSSPTIVNVSSSMGR	frv2_117542	frv2_117542	yes	yes	2.6713e-23	112.42	14553000	41619	69212	0	170440	939890	72199	0	0	0	56035	172120	32662	79816	100640	51544	144350	0	87240	330900	304430	431040	0	0	0	336210	40831	0	110510	0	0	169920	0	0	647480	0	237380	0	0	0	0	0	0
LDILVNNAGIPGVHIDSEALAAANIVEENR	frv2_117542	frv2_117542	yes	yes	6.0088e-12	87.28	475470	0	0	0	0	0	0	0	0	0	0	0	0	0	0	0	0	0	0	0	0	0	0	0	0	0	0	0	0	0	151340	0	0	0	0	218720	105420	0	0	0	0	0	0
TDINYNTGHLTPDEGAESIVR	frv2_117542	frv2_117542	yes	yes	0.00010018	81.788	6626900	0	0	28350	103300	183840	68676	27819	0	108010	26045	46872	34602	55577	87881	43909	49769	0	92179	0	82217	102900	32120	0	48336	152410	145060	71543	0	0	124230	128700	207030	0	387410	210230	167780	0	0	0	0	0	0
GFAFVTMSR	frv2_117566	frv2_117566	yes	yes	6.5213e-05	143.37	10789000	137190	101440	91184	254030	419860	57357	12629	24097	0	119170	96391	63884	71609	116410	56293	32302	0	0	427090	122350	90557	68606	20795	36215	61943	47058	19285	119900	68329	93972	0	92084	0	0	0	0	216910	133630	104710	0	0	49417
LYFGNLPYSVDSAQLAGLVEDYGSAELIEVLYDRDTGK	frv2_117566	frv2_117566	yes	yes	1.0317e-05	62.455	4323100	0	62938	83862	262220	407360	39229	0	0	0	168050	137200	0	0	0	0	0	0	0	304300	0	0	0	0	0	0	0	0	0	0	0	0	0	0	0	0	0	0	105700	0	0	0	0
SLGDLMQEANQEVPAWLTR	frv2_117570	frv2_117570	yes	yes	1.3295e-59	183.22	7485000	0	0	0	0	0	132460	0	0	96123	0	53088	31821	54029	85271	64605	68153	0	67185	0	0	0	0	0	0	334220	152670	42865	0	36943	0	0	0	0	0	0	0	0	0	139560	0	0	0
TPILVATDVAAR	frv2_117570	frv2_117570	yes	yes	1.9755e-05	122.39	6515700	0	0	0	65005	136140	26638	9843.9	23276	42233	0	19915	15146	11105	22360	17671	17701	0	14045	41218	0	34552	48640	25313	27581	73272	91236	0	20810	0	0	0	140110	0	174820	134360	89016	0	71434	42367	68561	0	105320
EGVDYESVDVLDEDYNYGLR	frv2_117598	frv2_117598	yes	yes	0.0014343	70.986	3241600	87901	130140	57535	157010	0	0	0	0	0	29365	0	17968	0	0	0	0	0	0	160380	0	0	0	0	0	0	0	0	98686	72944	0	0	0	0	0	0	0	138550	146530	0	0	0	0
GEVAGLFKK	frv2_117598	frv2_117598	yes	yes	0.010548	102.07	176160	0	0	4976.3	0	34712	0	0	0	0	5808.5	3442.6	0	0	0	0	0	0	0	29732	0	0	0	0	0	0	0	0	0	2658.2	12320	0	0	0	0	0	0	0	0	0	0	0	0
HVQLTVSLEELVDKLVK	frv2_117598	frv2_117598	yes	yes	3.225e-58	194.32	1207600	0	0	0	0	120510	0	0	0	0	92447	55023	0	0	0	0	0	0	0	0	0	0	0	0	0	0	0	0	0	0	0	0	0	0	0	0	0	0	0	0	0	0	0
NIAATISAHR	frv2_117598	frv2_117598	yes	yes	0.00085299	133.91	2365600	19940	22739	40388	41484	70439	7163.3	0	0	7112.6	22490	9789.9	10601	10256	11692	6348.1	6520.9	0	0	118050	40373	19449	12790	0	0	12500	7453.7	0	55927	24773	37907	0	34225	0	30864	0	0	55974	42086	12551	14536	19552	17224
NIAATISAHRK	frv2_117598	frv2_117598	yes	yes	0.051672	74.237	772350	4580.4	4608.2	6476	19844	42654	0	0	0	0	18229	10379	8552.4	7081.1	10450	7048.1	6096	0	0	30324	10267	8360.7	0	0	0	4245.6	0	0	19880	0	18660	6408.1	0	0	0	0	0	17113	20006	0	0	0	0
NLGETESVTVSPESDGPAGELPPEAGVYAVYDKDGELQFIGLSR	frv2_117598	frv2_117598	yes	yes	0.00082587	35.03	6049400	116050	158010	0	0	0	0	0	0	0	0	151220	0	107970	128930	0	0	0	0	415770	0	0	0	0	0	0	0	0	97458	126280	0	0	0	0	0	0	0	0	0	0	0	0	0
VGVVDEPDREALTQAWK	frv2_117598	frv2_117598	yes	yes	0.00041295	102.36	13212000	158300	193920	171160	472200	503520	0	0	0	0	245240	124210	91325	96014	130050	22655	27876	0	31131	701530	113820	0	0	0	0	0	0	0	279640	144800	198820	114190	0	0	76886	0	61600	309860	322810	172510	0	0	0
VIGILEKEGVDYESVDVLDEDYNYGLR	frv2_117598	frv2_117598	yes	yes	2.4326e-06	77.689	2490800	0	0	0	0	0	0	0	0	0	231620	200950	93008	111820	146730	0	0	0	0	0	0	0	0	0	0	0	0	0	0	0	0	0	0	0	0	0	0	0	0	0	0	0	0
ANYAPYGIDFPAGPTGR	frv2_117604	frv2_117604	yes	yes	2.486e-24	146.67	26633000	0	0	0	0	680370	214440	50400	61816	55158	0	103050	206390	328000	0	400180	320790	0	97108	0	155920	388060	310030	126870	283090	317490	138350	78258	0	0	181470	581010	640920	196280	685590	470160	51153	0	0	284260	221210	138200	225490
AYNAQSASDAYPFDINHLAQI	frv2_117604	frv2_117604	yes	yes	1.8866e-23	132.67	88279000	530280	1393400	1377900	1909700	1907100	336280	87418	32568	117910	623490	479680	422520	248570	0	234930	0	0	220390	0	1577500	2529700	89594	35182	260370	251640	117970	0	1402300	137300	0	871520	446110	0	416260	298880	135990	1088900	1274400	706040	754240	191310	714500
GVNYASAAAGIREETGQQLGQR	frv2_117604	frv2_117604	yes	yes	6.8252e-18	128.72	2110400	0	0	0	0	0	0	0	0	0	0	0	47090	105660	193580	75112	86997	0	28159	0	0	0	0	0	0	0	0	0	0	0	0	0	0	0	0	0	0	0	0	0	0	0	0
QFTPQQYADVLLQAYAQQLR	frv2_117604	frv2_117604	yes	yes	6.512e-97	210.39	27058000	0	49594	81087	247700	985690	164460	0	0	32352	0	0	127960	135690	249630	266360	333630	0	55502	0	62758	554640	0	0	92506	241920	0	0	0	9941.9	127190	546730	167840	0	738700	129090	94636	0	71699	94916	270310	27824	54027
SLVDQFNNQFPNAR	frv2_117604	frv2_117604	yes	yes	4.3811e-60	205.62	18149000	0	0	55268	0	622180	99305	0	0	0	0	40116	121670	134680	234320	177580	171220	0	85294	0	190900	269480	108720	39438	0	198850	0	0	0	0	160760	462050	475600	0	595230	354450	84755	0	0	105930	142580	0	114260
TVSQLVNNFGDESTTANYLSK	frv2_117604	frv2_117604	yes	yes	4.6859e-97	201.12	15117000	0	0	0	172920	637940	150900	30458	0	0	0	0	109620	225690	334500	257730	191420	0	63117	0	154450	315910	144660	0	141750	289010	84295	0	0	0	59767	0	0	0	814450	511980	71690	0	0	0	0	0	0
ATDAATTMPTESNPYVSPAPVPAPTPAK	frv2_117630	frv2_117630	yes	yes	9.5618e-15	98.299	28021000	35774	53231	0	0	0	125510	42480	60862	182450	0	78041	91716	142380	234490	150890	95842	0	135990	0	122960	233650	226650	94713	188210	350940	224210	132230	0	44341	48778	260010	756330	74257	715260	758810	233990	0	137010	225770	381570	313800	307620
HIQEALQSR	frv2_117630	frv2_117630	yes	yes	0.034643	65.627	418580	0	0	0	7098.8	0	0	0	0	4359.5	0	0	0	0	0	3001.8	0	0	0	0	0	5724.5	0	0	0	5870.5	0	0	0	0	0	0	8615.8	0	31844	15772	13187	0	0	7173.4	7355.3	0	10215
IDPNDVAPPPPPSQSVATESR	frv2_117630	frv2_117630	yes	yes	0.0042976	61.304	1533800	0	0	0	0	0	13734	8966.1	0	16133	0	0	0	0	30132	19064	0	0	21855	0	0	0	0	0	27927	25477	33607	26553	0	0	24554	43351	43381	0	0	0	0	0	0	0	32483	0	0
KAEDLAGNMWQHLK	frv2_117630	frv2_117630	yes	yes	0.047736	54.199	4037700	0	0	0	0	114690	28775	0	0	0	19036	27188	0	28794	61059	21711	23896	0	21683	0	66114	50750	0	0	15270	48540	0	16721	23079	0	39731	98235	34319	0	127090	93225	55420	0	102950	38465	67364	90945	72201
LAFSSDNPLSYQTGDQTQWSYYK	frv2_117630	frv2_117630	yes	yes	8.7238e-41	148.4	21027000	0	0	0	0	210990	63291	0	0	84939	0	168640	128170	89390	182840	153580	122520	0	85263	0	0	108370	0	0	0	121920	0	0	0	0	0	370430	127340	0	674930	106890	334490	0	174280	123210	375480	0	296860
VVIPLHQLR	frv2_117630	frv2_117630	yes	yes	0.0016795	107.01	5780000	0	18792	16956	95564	119590	28945	5500	7424.4	35370	3986.9	20975	11511	11459	34429	21197	13758	0	16238	29717	32982	35429	17241	0	13709	50751	0	13305	23764	0	31640	54285	74537	0	122330	60692	64432	25794	100310	51451	60540	105410	78346
DMDWESTFHLR	frv2_117668	frv2_117668	yes	yes	9.6831e-06	161.19	24844000	0	43110	128670	121330	0	304600	31591	181420	353320	65575	37791	28077	161480	476200	242130	234060	0	249320	302790	490120	402400	70067	47242	475000	839520	1165600	211800	117240	49961	131860	1249500	871110	0	1922400	940090	577850	0	0	0	0	0	0
GLEAVQTEVKDMDWESTFHLR	frv2_117668	frv2_117668	yes	yes	6.5629e-73	180.03	13834000	0	0	0	0	0	0	0	0	0	116350	492140	334620	673900	1077700	432380	147930	0	321930	0	0	0	0	0	0	385210	0	0	0	0	0	266050	0	0	233200	0	0	0	0	0	0	0	0
GAAEMMYVGSTLPVLPIIMWDDQPIGDGK	frv2_117707	frv2_117707	yes	yes	0.045669	31.535	1496400	0	0	0	0	0	23275	0	0	31099	0	0	0	0	0	0	0	0	25697	0	0	0	0	0	0	81402	29398	0	0	0	0	0	0	0	146950	97345	61326	0	0	29468	0	0	0
VGELTMLVSDLLWDDMVAGPETQR	frv2_117707	frv2_117707	yes	yes	0.0010168	57.806	2204100	0	0	0	47017	0	0	0	0	0	0	0	0	0	0	0	0	0	0	103740	50649	62431	0	0	0	47563	0	0	23155	0	0	0	0	0	40714	0	0	0	0	0	0	0	0
NATFAAINEGIVPGGGATYVHLLDLIPSIK	frv2_117838	frv2_117838	yes	yes	4.3979e-16	98.267	6538000	71626	0	67304	291370	0	0	0	0	0	144950	148580	36637	54739	56647	30703	47840	0	0	598730	0	246670	0	0	0	0	0	0	173300	0	0	0	0	0	0	0	0	0	218650	0	0	0	0
APGGAPANVAIAVNR	frv2_117858	frv2_117858	yes	yes	9.5026e-39	194.06	33013000	45004	71747	74627	257910	447290	106310	57425	0	0	70317	160400	168390	164910	332030	165280	130740	4796.5	129890	122320	323680	271040	91588	79186	135390	345420	279520	124720	139390	85821	294950	576280	406710	72643	847890	837730	262670	198450	741180	439420	558980	588750	548770
EFMFYRNPSADMLLKPEELNLELIR	frv2_117858	frv2_117858	yes	yes	5.1625e-07	84.107	1868900	0	0	0	0	0	0	0	0	0	0	0	0	36047	0	36800	56978	0	0	0	0	0	0	0	0	0	0	0	0	0	0	0	0	0	0	0	0	0	0	151420	0	0	0
KQILSIWEK	frv2_117858	frv2_117858	yes	yes	0.0074446	107.45	7377500	0	0	33878	103740	248570	15498	8301.6	0	13786	51178	43665	41984	41928	126600	44645	47806	0	43528	58515	76716	0	32727	9405.9	35095	101900	37878	0	0	16723	56025	152170	85044	0	242670	259330	124650	52672	211310	82464	185960	174670	127870
LGDDEFGHMLAGILK	frv2_117858	frv2_117858	yes	yes	1.007e-29	181.98	33915000	86779	0	49303	247990	425040	180110	22317	0	126060	32144	80960	129270	156760	161910	206820	171130	0	147680	131590	607010	211950	0	0	50380	505250	176920	60398	126820	37859	0	746500	0	0	1137100	227930	408960	94927	810590	520250	836640	594490	409060
LLLVTLGEHGAK	frv2_117858	frv2_117858	yes	yes	1.1567e-05	142.89	31505000	43362	0	0	83687	0	57154	48224	0	35410	23278	203900	172950	210550	489290	136860	227300	5273.5	150750	0	398880	335340	117910	75773	192930	455430	292600	130900	54127	75939	83923	595340	844520	0	977910	889470	104400	169000	667990	420000	852710	1178900	852630
LPLWPSADEAR	frv2_117858	frv2_117858	yes	yes	0.0020977	97.472	8998000	0	0	0	178050	0	86843	40547	0	0	0	0	0	0	97546	0	0	0	15298	0	66460	0	0	0	75995	0	0	72619	0	0	86881	170610	373570	125600	417170	400720	185790	62332	135470	0	169820	303170	163160
NPSADMLLKPEELNLELIR	frv2_117858	frv2_117858	yes	yes	3.0773e-44	161.75	50793000	126440	122640	81778	330780	713980	191910	0	0	308600	0	216520	151860	212860	145720	169870	178820	0	261290	229780	580970	512890	0	0	57781	662460	114330	85404	228740	147230	0	690440	205480	0	2057900	656050	729420	147400	1100300	749610	968850	194430	385760
VSDNELEFLTGSDKIDDETALTLWHPNLK	frv2_117858	frv2_117858	yes	yes	2.3956e-37	125.39	94912000	72738	0	0	0	872040	567460	0	0	253470	179070	1015300	500700	1164000	1069800	773770	965200	0	915530	667980	693500	558600	0	0	0	1685300	261800	0	419900	217720	164750	2462600	0	0	2707400	1079800	923590	0	2774100	1965800	2517700	0	1591500
INPSLVADLYSDWIMPLTK	frv2_117903	frv2_117903	yes	yes	2.2479e-08	113.49	4118200	18331	25951	41906	138450	252790	0	0	0	0	104980	55286	10328	42969	19247	11367	33158	0	19342	163810	0	41525	0	0	0	22843	0	0	122060	0	0	0	0	0	52380	0	0	0	0	0	0	0	0
DSMLGGSPFGNILQQGFVTGLR	frv2_117927	frv2_117927	yes	yes	0.055177	41.296	1749500	28763	41905	0	0	0	0	0	0	0	0	0	17016	0	0	0	0	0	0	148130	0	0	0	0	0	0	0	0	0	20316	0	0	0	0	0	0	0	0	0	0	0	0	0
INYLATSVIALSQGIPFFHSGDEILR	frv2_117927	frv2_117927	yes	yes	0.00029044	60.939	915360	0	0	0	0	0	0	0	0	0	0	0	0	0	0	0	0	0	0	0	0	0	0	0	0	0	0	0	0	0	0	0	0	0	0	0	0	0	0	0	0	0	0
LGDSWYPVQAGDVIWMAPFVPQWYAALGK	frv2_117959	frv2_117959	yes	yes	0.00054788	52.97	945990	0	0	0	0	0	0	0	0	0	0	0	0	0	0	0	0	0	0	0	0	0	0	0	0	0	0	0	0	0	0	0	0	0	0	0	0	0	66905	0	0	0	0
ASDSPLPTAPGYDVSGVVVK	frv2_117981	frv2_117981	yes	yes	0.01628	54.412	3601500	0	0	40222	0	0	71648	43457	77825	94619	0	0	35714	53058	0	0	0	0	0	0	116640	0	79220	58659	60341	184990	97721	46684	0	0	0	66323	0	0	142160	218580	42116	0	0	0	0	0	0
VIGSLAEYTAAEEIVLAHK	frv2_117981	frv2_117981	yes	yes	0.072967	64.537	1037100	0	0	0	0	0	20267	0	0	0	0	0	0	0	0	0	0	0	32800	0	0	0	0	0	0	0	0	26840	0	0	0	0	0	0	0	0	0	0	0	66206	66440	0	146670
AAAVAALSNVLTAEK	frv2_11802	frv2_11802	yes	yes	4.9143e-07	119.65	14162000	0	48475	36297	104190	0	119300	42136	0	71807	0	48693	67073	86683	268140	142510	82630	0	56270	0	144770	98871	190910	85353	131940	277590	181400	60423	0	0	0	127750	327970	0	290580	249330	58889	0	159730	0	0	492630	145030
AASLEGLSPQVPLYK	frv2_11802	frv2_11802	yes	yes	3.5427e-06	113.4	23582000	0	0	67827	135770	405030	135250	0	57327	142920	33240	76010	96960	84179	163980	92984	90326	0	79230	87947	159320	176080	136700	75870	114150	288070	216990	82746	85708	0	125710	260640	0	0	646640	410070	208110	63958	307660	155700	242390	367720	276560
AEALAALNNAFNSSPETAPSTDRLNSLNQGGPR	frv2_11802	frv2_11802	yes	yes	1.2551e-15	89.879	17231000	0	0	0	0	0	150390	53991	61430	86246	0	100950	84041	131780	254020	107490	136970	0	117160	0	168520	192680	0	0	180990	329730	299730	78964	0	0	0	384360	403630	0	505320	358830	193330	0	0	251410	310660	0	0
AEALAALNSAFSSSSGTK	frv2_11802	frv2_11802	yes	yes	1.9677e-83	211.67	13671000	32848	0	0	79508	109620	78069	28368	49942	80974	0	0	41282	0	115110	48072	52080	0	59944	0	118150	73984	164850	91037	132630	238070	235390	53328	0	0	78815	172480	443350	0	0	396610	112410	65678	0	91087	189130	326850	158170
QRAEALAALNNAFNSSPETAPSTDR	frv2_11802	frv2_11802	yes	yes	0.00067658	61.16	992650	0	0	0	0	0	0	0	0	0	0	0	0	0	0	0	0	0	0	0	0	0	0	0	0	0	0	0	0	0	0	0	0	0	0	0	0	0	0	0	0	0	0
QRAEALAALNNAFNSSPETAPSTDRLNSLNQGGPR	frv2_11802	frv2_11802	yes	yes	5.9721e-05	60.029	14826000	0	0	0	0	612390	115150	0	0	0	77770	158160	241310	249100	596540	198440	245050	0	166180	0	110850	0	0	0	0	490660	0	0	0	0	0	247500	0	0	0	200020	0	0	258070	245360	257070	0	0
QRAEALAALNSAFSSSSGTK	frv2_11802	frv2_11802	yes	yes	0.0076419	59.252	2676900	0	0	0	0	0	25474	10852	9450.8	21529	0	0	0	33700	147490	0	48239	0	33016	0	32546	0	21942	20942	0	63231	0	0	0	0	0	0	0	0	108320	121360	0	0	61484	61975	0	0	69472
IDVFEIISMESNPPYHPNQK	frv2_118048	frv2_118048	yes	yes	0.055685	44.662	2680500	0	0	0	0	0	0	0	0	0	0	0	0	0	0	0	0	0	0	0	0	0	0	0	71527	0	0	0	0	0	0	0	0	0	0	0	0	0	258800	173250	0	0	145030
QAFDEAIADLDTLSEESYKDSTLIMQLLR	frv2_118099	frv2_118099	yes	yes	0.00053117	54.521	3925600	0	0	0	0	0	0	0	0	0	0	1031500	15370	107690	37904	15732	205350	0	27166	0	0	0	0	0	0	0	0	0	0	0	0	99916	0	0	0	0	0	0	0	213600	0	0	0
EIPPELILPDNILPDK	frv2_118137	frv2_118137	yes	yes	5.6732e-07	117	18003000	76286	88728	74880	206370	371420	141470	43759	62004	93743	0	109860	0	94411	0	0	0	0	0	0	172720	105630	67279	37699	131630	138460	156400	63799	76651	64543	0	0	283500	175720	268940	225840	102880	85214	291450	190240	0	334160	0
FHGGYYIEEQLSR	frv2_118137	frv2_118137	yes	yes	0.00030171	100.73	16482000	58874	42506	119230	171840	485660	131770	28134	33134	63764	70449	74769	64287	78681	101380	72031	60024	0	46806	133500	273940	120170	0	7991.3	60571	69433	116200	29925	137980	0	32788	164980	341170	0	407690	178760	148920	115140	266790	158990	159070	392700	222100
KLTDEEIAFISQSATNYTNLAQVHAAENSK	frv2_118137	frv2_118137	yes	yes	7.5079e-17	101.73	38144000	0	0	0	0	0	206040	0	0	222490	356160	435410	301090	187130	0	180920	306340	0	0	0	487300	0	0	0	116530	0	178670	0	115140	267840	0	0	564480	0	980090	914020	267130	563610	566220	1093700	587730	912220	563380
YATKDEEYDSMLGVVR	frv2_118137	frv2_118137	yes	yes	0.0050493	83.54	2262400	0	27818	0	0	0	17767	0	7753.7	30594	0	0	0	22623	50479	17114	0	0	0	0	0	0	0	0	24324	62059	48886	0	0	0	0	0	0	0	0	0	0	0	65015	57404	0	0	53960
GDVNSITIGSSTNIQDNSLVHVAK	frv2_118250	frv2_118250	yes	yes	0.022466	40.779	2944600	103660	0	0	0	514680	0	0	0	115490	0	0	0	0	0	0	0	0	0	0	0	0	0	0	0	0	0	0	0	85320	0	0	0	0	0	0	0	0	0	0	0	0	0
HAMVAAGALVK	frv2_118250	frv2_118250	yes	yes	0.00039102	124.92	6592400	16706	22081	23292	70488	147970	30323	11537	6429.9	35630	31655	23622	24123	16329	27778	23412	22869	0	21064	104170	79612	60996	0	14481	28202	69409	39470	21166	40748	18606	48606	86449	0	0	127480	89886	53998	0	81915	58155	65978	73042	67194
HRPLMNVYDK	frv2_118250	frv2_118250	yes	yes	0.022049	84.817	1058800	0	0	6396.6	0	0	4252.7	0	0	0	5965.7	6123	0	0	0	0	0	0	0	15621	0	0	0	0	0	0	0	0	0	0	0	0	0	0	30320	0	0	0	18228	0	8431.7	10934	6929.6
KLTEDEMTFFSQSALNYSNLAQAHAAENAKPLDETEFVK	frv2_118250	frv2_118250	yes	yes	1.1165e-05	60.879	15521000	0	0	0	0	868210	136770	0	0	0	124060	169840	0	109900	237520	142800	128710	0	0	786540	359120	0	0	0	0	319010	0	0	0	0	0	0	0	0	0	0	257060	0	430410	428380	0	0	216660
KVARPEDGSVLGAVQDTPPETNLPNNVVVDK	frv2_118250	frv2_118250	yes	yes	5.6285e-05	60.687	17078000	57753	87096	109820	0	466020	144890	16407	0	50458	129650	184700	122930	111450	130590	120660	0	0	39455	328920	251690	0	0	0	0	0	0	0	0	0	0	189970	0	0	0	0	0	196850	409200	263900	112660	401780	186500
VARPEDGSVLGAVQDTPPETNLPNNVVVDK	frv2_118250	frv2_118250	yes	yes	3.9535e-38	121.48	28807000	98517	107510	117990	230580	723260	213730	76385	0	116440	168040	208330	134990	97890	127130	106660	60780	0	0	0	254730	124590	0	63175	119530	0	0	0	0	0	0	344290	0	0	370380	513540	0	0	568220	315140	0	533930	332790
VARPEDGSVLGAVQDTPPETNLPNNVVVDKVPK	frv2_118250	frv2_118250	yes	yes	0.0064542	39.582	3605900	0	0	0	0	0	0	0	0	79343	0	0	0	0	0	0	0	0	0	0	71320	97774	0	0	0	95330	0	0	0	0	0	0	285870	0	281560	0	0	0	0	0	0	172750	0
DLVALSGAHTIGLTR	frv2_118266	frv2_118266	yes	yes	0.0011271	113.65	6210400	0	0	0	0	0	120070	0	14475	61270	0	0	0	0	15673	0	0	0	0	0	71552	45957	17718	0	33422	0	0	45803	0	0	0	0	63737	0	70604	110830	0	0	0	0	76090	149540	42616
MSNLNPLTGSK	frv2_118266	frv2_118266	yes	yes	0.00014332	130.69	4247400	0	0	0	0	0	82999	22873	29493	0	0	0	0	0	0	0	21264	0	0	0	0	0	86716	0	51161	93373	47992	0	0	0	0	0	0	0	0	62987	0	0	0	0	0	0	0
TGNDNVYQPFDFQTPTHFDNLYYK	frv2_118266	frv2_118266	yes	yes	1.1817e-05	82.146	38370000	0	85586	0	0	809040	322590	68326	0	344270	0	80221	114910	252390	385620	266270	309110	0	379320	0	331860	323530	0	0	309060	717870	460790	196920	0	0	0	316100	612090	0	541130	286900	481650	0	367570	276900	423070	0	0
YANDNEEFFEAFAEGMVK	frv2_118266	frv2_118266	yes	yes	6.6854e-34	161.31	10963000	62318	0	0	0	0	219910	43115	31640	83208	0	0	0	0	0	0	0	0	0	0	106900	0	0	0	66285	231860	145360	0	0	0	0	0	0	0	204160	0	65948	0	221710	149430	0	71031	126310
GALGQAVNVLQQLPVPLR	frv2_118337	frv2_118337	yes	yes	7.2875e-40	170.42	16633000	138240	248620	198410	519570	627490	0	0	0	0	115320	0	23368	0	0	25248	0	0	0	893110	326650	122780	0	0	0	0	0	0	359020	167740	0	0	0	0	0	0	0	241530	208910	0	0	0	0
GALGQAVNVLQQLPVPLRDALSNGLK	frv2_118337	frv2_118337	yes	yes	0.00032459	63.044	281820	0	0	0	0	0	0	0	0	0	0	0	0	0	0	0	0	0	0	0	0	0	0	0	0	0	0	0	0	0	0	0	0	0	0	0	0	0	0	0	0	0	0
MKEEYVEGILVSPTVLENRVPEQLK	frv2_118337	frv2_118337	yes	yes	1.9171e-46	142.93	6004300	0	0	0	0	0	0	0	0	0	150810	118580	60338	28211	0	0	0	0	0	866960	179430	0	0	0	0	0	0	0	196460	0	0	0	0	0	0	0	0	0	0	0	0	0	0
NTSGIPEVLTK	frv2_118337	frv2_118337	yes	yes	0.065451	53.013	158660	21649	0	0	0	0	0	0	0	0	0	0	0	0	0	0	0	0	0	0	0	0	0	0	0	0	0	0	0	17426	0	0	0	0	0	0	0	0	0	0	0	0	0
VPLSGSFQR	frv2_118337	frv2_118337	yes	yes	0.026502	70.028	3131700	22770	57943	39494	120220	132810	3151.7	0	0	5777.1	57609	35879	14098	8611.2	6331.9	0	0	0	0	158440	35757	17895	0	0	0	0	0	0	76592	35558	19153	0	0	0	17286	0	0	71701	57730	25094	0	0	0
HYMLFK	frv2_118383	frv2_118383	yes	yes	0.048605	78.156	315800	0	0	0	0	0	0	0	0	0	0	0	0	0	0	0	0	0	0	0	0	0	0	0	0	0	0	0	0	0	0	0	0	0	0	0	0	0	0	0	0	0	0
VTNWGASIVSLVLPDNK	frv2_118383	frv2_118383	yes	yes	0.00031338	90.755	5927600	0	0	0	0	0	0	0	0	55523	0	0	0	0	0	0	34117	0	46063	0	0	0	0	0	0	148570	27132	0	0	0	0	0	0	0	161280	81396	0	0	267550	74896	201080	0	76668
NLSFIEAASVPLAMETAYEGLER	frv2_118480	frv2_118480	yes	yes	0.0041895	55.128	1629800	0	0	0	0	0	0	0	0	35271	0	0	0	28470	39467	0	20058	0	31950	0	0	0	0	0	0	47491	0	0	0	0	0	0	0	0	76971	0	30299	0	0	0	0	0	0
TPVPFSDVIEAFSYLETSR	frv2_118480	frv2_118480	yes	yes	1.489e-08	115.91	6533200	0	33860	18599	0	234160	33633	0	0	87036	17182	0	0	15051	62354	10647	88469	0	64869	0	0	0	0	0	0	106140	27263	0	0	15579	0	52929	0	0	214900	0	132690	15001	0	97501	0	0	43083
VVAASINPVDYK	frv2_118480	frv2_118480	yes	yes	0.03113	60.301	363620	0	0	0	0	0	0	0	0	0	0	0	0	0	0	9436.6	0	0	0	0	0	0	15916	0	0	0	16737	0	0	0	0	0	38942	0	0	0	0	0	0	0	0	0	0
ALQHYTELPDIK	frv2_118672	frv2_118672	yes	yes	0.0074456	77.597	565340	0	0	0	0	0	0	0	0	0	0	0	0	0	0	0	0	0	0	0	66758	0	0	0	0	0	25679	0	0	0	33789	0	0	0	124270	115470	0	0	0	28994	55839	0	0
ALQHYTELPDIKR	frv2_118672	frv2_118672	yes	yes	0.0015948	104.41	3092300	0	0	0	0	0	10512	5630.5	0	0	0	9154.8	0	13626	10559	9962.2	13114	0	0	0	64335	51993	14287	0	26171	48405	38656	0	0	13253	55175	109610	200040	0	0	149570	0	0	69028	0	89850	55539	32894
EATAFLLDVLKPNLPEHGFLQTK	frv2_118672	frv2_118672	yes	yes	2.2617e-29	130.02	21081000	0	0	47923	109770	412710	99599	0	0	102770	34012	0	0	108390	0	0	139760	0	0	201410	499400	488570	0	0	0	299340	0	0	0	39287	0	436450	0	0	542050	0	0	0	392680	369350	701230	219950	142590
FQSVPVQAGQTPPLLQYFGTLLTR	frv2_118672	frv2_118672	yes	yes	1.3719e-23	129.07	16540000	0	60577	0	0	461740	59608	0	0	44056	0	84809	73661	128480	121520	104540	144040	0	80600	0	297000	183300	0	0	0	182250	25361	0	0	34611	170550	198890	76840	0	417610	273840	128640	0	348860	182440	335930	30349	88199
QVGYTPDYLFLLQTILR	frv2_118672	frv2_118672	yes	yes	3.4005e-39	167.14	9038900	14311	26088	43726	96631	290480	17939	0	0	27775	0	51712	0	58984	0	0	88415	0	49853	110960	124700	225870	0	0	0	81615	0	0	54904	0	53724	72184	0	0	275950	0	42465	0	34456	126170	134680	0	17417
TDPQGAVNFALMMSQMEGGSPIDYNTITDLFLQR	frv2_118672	frv2_118672	yes	yes	0.02225	31.235	1117500	0	0	0	0	77457	0	0	0	0	0	0	0	0	0	0	0	0	0	91500	297290	117430	0	0	0	0	0	0	0	0	0	0	0	0	0	0	0	0	0	0	0	0	0
VIVNTHAIEPQSLVEFFGTLSR	frv2_118672	frv2_118672	yes	yes	2.497e-12	111.45	6394000	0	0	0	0	0	48195	0	0	54864	0	49908	23568	29822	0	46730	42387	0	43986	0	200250	0	0	0	0	0	0	0	0	0	144410	191930	0	0	315860	110910	62335	0	0	159670	364460	0	77006
VVAAFAEKR	frv2_118672	frv2_118672	yes	yes	0.060429	80.165	61735	0	0	0	0	0	0	0	0	0	0	0	0	0	0	0	0	0	0	0	0	0	3684.2	0	0	0	0	0	0	0	0	0	0	0	9884.2	8344.8	5478.3	0	0	5821.4	0	0	0
DSILLSGGPSWNVPLGR	frv2_118754	frv2_118754	yes	yes	2.048e-39	170.78	14178000	0	0	0	0	0	0	0	0	0	0	0	0	0	0	0	0	0	0	0	0	0	0	0	0	0	0	0	0	0	0	0	0	0	0	0	0	0	731490	177280	0	159280	0
FAFPNVNSVR	frv2_118754	frv2_118754	yes	yes	0.0040377	92.239	1829700	13042	31327	26738	112840	0	0	0	0	0	0	38590	20005	0	0	0	0	0	0	0	0	0	0	0	0	0	0	0	29116	0	0	0	0	0	0	0	0	0	0	0	0	0	0
FISDAVGSLPK	frv2_118765	frv2_118765	yes	yes	0.00036122	138.63	7882700	32769	0	0	0	0	30842	8192.9	21186	45577	0	0	46502	49429	0	45209	33953	0	30333	0	140140	55607	74429	26845	24279	174750	71227	23800	50332	0	94504	0	161620	0	0	0	0	0	146200	85784	0	152660	0
IPSDLEGMEASMEHLLALIDDIYK	frv2_118765	frv2_118765	yes	yes	3.8573e-40	147.17	803280	0	0	0	55409	0	0	0	0	0	0	0	0	0	0	0	0	0	0	125760	0	27515	0	0	0	0	0	0	25576	0	0	0	0	0	0	0	0	0	0	0	0	0	0
LVNDSLQDHLLMLYLSSITR	frv2_118765	frv2_118765	yes	yes	0.052101	39.351	7680900	29038	36681	0	169420	281740	61064	0	0	27344	0	56867	10757	0	0	20173	17398	0	0	0	163570	129000	0	0	0	73373	0	0	39448	15656	0	0	0	0	131160	0	22244	0	120660	42615	0	0	0
GFGFITFNSVEEASSAIQALDGQDLHGR	frv2_118794	frv2_118794	yes	yes	1.8545e-47	137.43	30966000	0	100000	0	206490	0	304450	0	0	332440	130400	0	101610	201830	430870	246190	132070	8296.4	163570	438470	169000	335940	0	0	0	606960	141730	0	246880	85951	173590	0	57907	0	1107700	388500	208350	109950	0	0	447010	23982	349540
GFGFITFNSVEEASSAIQALDGQDLHGRR	frv2_118794	frv2_118794	yes	yes	4.0857e-11	88.684	3938300	0	0	0	0	0	0	0	0	0	0	0	0	0	385290	0	0	0	75987	0	0	0	0	0	0	183610	0	0	0	0	0	224120	0	0	0	0	0	0	0	0	391200	0	0
LFIGGISYSTDEPSLR	frv2_118794	frv2_118794	yes	yes	3.1811e-21	151.49	20886000	50772	0	0	0	0	161950	96776	127460	103490	115660	121080	66009	101980	519100	141140	97087	0	70905	185700	0	85245	249460	153140	288900	315660	198120	103570	43930	40251	0	401010	430970	0	362520	287190	85900	0	147170	145380	292130	239310	275310
NLEDPHTSPSSDTTLPISVLTK	frv2_118819	frv2_118819	yes	yes	0.00060663	65.598	7731500	0	0	0	0	0	0	0	0	51247	69957	80211	129190	78056	165680	117440	85577	0	129780	0	126490	93062	110530	0	101100	367210	195100	53146	0	0	0	120090	0	0	331290	282300	184350	0	207970	158080	0	0	0
HGPIYIENKPLSVIQPVPYQTADGK	frv2_118833	frv2_118833	yes	yes	1.7884e-10	97.352	8626600	0	0	0	0	0	54854	0	0	124450	0	24886	42079	53261	163620	51190	87697	0	180150	0	0	0	0	0	0	216790	93995	0	0	0	0	153670	0	0	369630	370220	272970	0	0	0	159480	0	162050
ILLVYNTTSR	frv2_118833	frv2_118833	yes	yes	0.00068838	148.91	8065600	0	0	0	0	0	37049	17543	18524	59021	0	14181	21427	28001	49662	34369	42696	0	53119	0	29058	48977	52796	26824	39865	105040	104260	68868	0	0	20710	100500	161240	0	0	245740	175050	0	63854	53933	95632	87661	100670
LPSDELLLFYK	frv2_118833	frv2_118833	yes	yes	0.00038659	131.42	4610700	0	26625	0	0	0	0	0	0	79221	0	0	16730	29147	0	0	20168	0	38257	0	0	0	0	0	0	66925	0	0	0	0	0	0	0	0	188380	0	0	0	0	0	0	0	0
WESPVIADEQPNVPMWNPVLFK	frv2_118833	frv2_118833	yes	yes	8.7258e-33	143.23	6015700	0	0	0	0	0	39163	0	0	0	0	0	0	0	0	0	0	0	0	0	0	0	0	0	0	111870	64457	0	0	0	0	0	0	0	170660	0	153230	0	0	0	0	0	0
DKFHVSYGGAALNR	frv2_118868	frv2_118868	yes	yes	0.005368	73.877	405680	0	0	0	0	0	0	0	0	0	22468	13797	0	0	0	0	0	0	0	0	0	0	0	0	0	0	0	0	57308	0	0	0	0	0	38624	0	0	0	49353	0	0	0	0
FFITQSDTGR	frv2_118868	frv2_118868	yes	yes	0.0034521	95.483	1560700	16150	52997	0	129550	0	0	0	0	0	37780	15972	24793	0	22405	0	0	0	0	0	0	22313	0	0	0	0	0	0	56903	25915	49306	0	20748	0	0	0	0	61665	33047	0	0	0	0
LTIINNLLQYHPESSELLAMGEVFGLKDPEK	frv2_118868	frv2_118868	yes	yes	0.027972	35.215	2341500	0	0	0	190930	0	0	0	0	0	131560	0	0	0	0	0	0	0	0	0	0	89640	0	0	0	0	0	0	0	0	0	0	0	0	0	0	0	0	0	0	0	0	0
ADLDGDGRISGAEAVGFFQGSNLPK	frv2_118881	frv2_118881	yes	yes	0.0083767	46.569	4057100	0	0	0	0	0	0	0	0	0	0	0	0	0	0	0	0	0	0	0	0	0	0	0	0	0	0	0	0	0	0	0	0	0	0	0	0	0	0	0	0	0	0
ISGAEAVGFFQGSNLPK	frv2_118881	frv2_118881	yes	yes	0.00034476	89.502	580150	0	0	0	0	0	0	0	0	0	0	0	0	0	0	0	0	0	0	0	0	0	54509	29870	0	0	0	0	0	0	0	182870	0	0	0	157780	0	0	0	0	0	112210	0
DGFLPQHFSSVYPGSVTVNLGPSGALAYSLNQQNFLLPR	frv2_118930	frv2_118930	yes	yes	6.3173e-29	101.82	35919000	63572	265500	308960	906690	2409400	60344	0	0	59702	113520	276600	0	0	0	0	0	0	34815	684710	364740	895130	0	0	0	0	0	0	197380	0	0	0	0	0	493120	0	0	0	737500	87986	0	0	0
FTFILFDSGSK	frv2_118930	frv2_118930	yes	yes	1.3159e-08	170.04	14986000	56830	61695	70003	104860	302390	59868	17148	0	87703	30260	115000	78552	73495	76831	95764	74796	6362	65447	263400	259860	163290	34934	19157	43369	307040	84923	78701	68895	0	0	171090	107170	0	223450	110670	174060	0	340660	112880	314580	180520	147440
SPEGLQTPESNSVSALK	frv2_118930	frv2_118930	yes	yes	0.000443	85.576	1357600	0	21008	0	61257	94389	0	0	0	0	0	0	0	0	0	0	0	0	0	0	30965	0	0	0	0	0	0	0	0	0	0	0	0	0	87976	0	0	0	0	0	0	0	0
ASGLSHSVVFHQLDVADAASVATLADFVK	frv2_118934	frv2_118934	yes	yes	5.5484e-58	145.34	33847000	0	0	0	125280	1022100	242020	0	0	312890	176130	206360	145310	239320	466380	274570	252490	0	290160	0	209070	393950	0	0	0	518230	150910	0	127510	57568	0	0	0	0	0	203870	0	0	447760	351380	526900	185260	331380
DSNLFNSALITNGQALSDDELR	frv2_118934	frv2_118934	yes	yes	7.6333e-58	166.93	8330000	0	0	0	0	0	0	0	0	143290	0	0	49547	66232	106010	71284	35604	0	123770	0	0	189320	35345	0	0	380960	0	0	0	0	0	0	99417	0	650030	366390	207870	0	0	0	0	232670	0
LALLPNGGPSGLYYIR	frv2_118934	frv2_118934	yes	yes	2.5582e-15	131.96	33988000	65905	192710	206430	519080	742770	125950	29983	33928	102710	0	85393	122850	147110	139430	160510	112620	17840	59821	359070	429300	323120	89583	45540	130010	351390	238360	94858	230720	81277	24922	431760	467140	0	574860	373590	272140	120960	308540	166170	245850	343410	112110
TDITANTGLYTAK	frv2_118934	frv2_118934	yes	yes	0.017034	70.628	2133600	0	0	0	0	0	0	4138.6	0	20003	0	13921	13174	19855	19577	17311	0	0	13951	0	20678	38210	32369	14768	21946	42913	23335	18069	0	0	33958	30122	72272	0	80122	66452	38292	0	0	0	0	30050	0
DITISQNPLISAR	frv2_118953	frv2_118953	yes	yes	1.8923e-95	199.13	158860000	815980	2647200	2617900	5537200	3915400	397430	82013	57758	125510	714440	743310	556680	187720	555440	233870	239610	0	325820	2350800	1894400	3268100	159340	104150	747660	321310	211880	1344300	2156000	298320	435760	1575000	552960	0	593150	540860	380720	1936900	1488100	734330	410290	337610	924300
FLGSPIIPPIPLDPQTGVSSK	frv2_118953	frv2_118953	yes	yes	1.3491e-08	102.59	27730000	0	0	0	0	0	0	0	0	71690	223970	274570	273170	209270	328090	233650	257430	15412	301270	355030	418040	249760	48299	22392	88915	286410	125190	89709	225290	177790	213780	497390	860190	0	862020	500730	584760	359430	1258200	784250	1159200	889470	596520
MLVFVAGNDDLR	frv2_118953	frv2_118953	yes	yes	7.3819e-05	112.5	12130000	0	0	185280	0	666510	0	0	0	0	0	116270	0	0	191340	0	0	0	0	0	0	0	0	0	0	0	457110	0	0	0	154840	0	0	0	0	849110	0	289590	0	371760	667990	0	0
MLVFVAGNDDLRDR	frv2_118953	frv2_118953	yes	yes	0.0095477	86.803	1636800	0	0	0	0	0	0	0	0	0	22316	0	40805	30292	0	0	35640	0	39495	0	0	0	0	16682	0	0	40702	0	0	0	63049	0	78074	0	140800	0	0	0	56201	81687	87283	0	0
EAAHVVYVSNLAWK	frv2_119032	frv2_119032	yes	yes	1.3125e-12	131.08	4372000	45212	23223	0	70198	176980	11837	0	0	0	45752	36398	23954	33891	63082	21308	0	0	12291	219910	61910	53612	21087	0	0	0	0	0	83104	48337	51338	0	0	0	0	0	0	81590	0	0	0	0	0
FAVFNLPWSLSAQDIK	frv2_119032	frv2_119032	yes	yes	8.4546e-47	191.44	23239000	172780	244730	216500	807090	811900	20413	0	0	0	249500	171320	79035	63149	86883	55270	35121	0	18027	770370	219760	129740	0	0	0	84506	0	0	343400	137330	0	57369	0	0	99263	0	0	242690	283120	0	0	0	0
LYLANQENFHK	frv2_119077	frv2_119077	yes	yes	0.00015331	150.09	1019900	0	0	0	0	0	7213.3	6174.3	9206.7	6730.2	0	0	0	0	24215	0	0	0	0	0	0	0	39116	23240	32402	0	0	0	0	0	25106	0	99582	0	85223	76573	27834	0	0	17000	30790	0	0
TLIDPNNVFTNEQGILPK	frv2_119159	frv2_119159	yes	yes	3.342e-24	141.22	3299300	0	0	0	0	0	0	0	0	31180	0	0	0	0	54635	0	0	0	61061	0	0	0	0	0	0	0	0	40835	0	0	0	0	0	0	133980	0	150550	0	177540	91148	139950	221630	0
HAVWGITK	frv2_119206	frv2_119206	yes	yes	0.035312	73.665	2681400	5870.2	10820	8992.9	32001	40267	11215	5371.5	3932.1	13527	9168.8	16058	14968	12467	27361	15641	14106	0	9018.4	23238	31974	19249	15036	10336	17709	31206	20003	11238	0	9892.1	14896	32419	56455	0	68756	55649	27263	12175	26574	15008	0	18522	15458
NANLQGVELTVDDVANAVLFLASDDAK	frv2_119206	frv2_119206	yes	yes	2.7704e-11	97.057	3815800	0	0	19622	57248	0	16291	0	0	0	10835	76372	0	11843	0	0	31365	0	0	124590	175870	146690	0	0	0	81154	0	56788	24037	0	62002	12747	0	0	103390	253460	0	0	105970	0	0	0	0
NVAAELGNHGIR	frv2_119206	frv2_119206	yes	yes	0.001591	92.247	1629900	0	0	5541.2	22625	33838	7196.4	0	0	0	0	0	5110.9	8396.8	0	7319.9	0	0	0	0	16549	17057	0	0	0	28642	0	0	0	8448	0	0	0	0	72646	42733	24337	0	18853	11604	0	0	10274
VAVVTGGASGIGASIVR	frv2_119206	frv2_119206	yes	yes	8.7139e-69	196.45	10557000	23885	37501	31562	107460	193880	54931	27509	21999	69665	25513	39275	44960	42240	122220	37351	28490	0	24800	89600	99869	59228	105850	29072	47711	112210	81366	47558	41216	31927	75797	128030	218900	0	150220	211390	94572	18303	0	0	48151	96643	48037
YISGENLMVDGGFTR	frv2_119206	frv2_119206	yes	yes	4.4773e-29	177.04	13925000	40667	71989	71992	116520	172830	69937	29669	65009	124320	46082	0	64805	0	0	59098	66366	0	62116	0	118610	0	67354	51429	90440	0	149390	68846	66209	0	0	134010	412170	0	335030	215620	129970	0	150320	71801	134200	166110	106130
SSVVSNSNYVVPIDDSLSFSNSSSTITRPLAEILR	frv2_119333	frv2_119333	yes	yes	1.8146e-05	63.316	18105000	127720	0	0	0	0	0	0	0	0	396940	485640	120510	319100	540780	147230	146100	0	0	668680	306280	175040	0	0	0	216790	0	0	489140	138220	0	0	0	0	0	0	0	220650	445410	0	0	0	0
AKAPVQAHFGELDNFVGFSDVTAAK	frv2_119383	frv2_119383	yes	yes	0.0050223	50.873	2520800	0	0	0	0	0	0	0	0	117560	0	0	0	122790	0	88521	105930	0	0	0	0	0	0	0	0	0	0	0	0	0	0	112950	0	0	0	0	79130	0	0	0	0	0	0
APVQAHFGELDNFVGFSDVTAAK	frv2_119383	frv2_119383	yes	yes	1.5516e-22	125.75	47459000	118570	97234	0	306610	669160	280590	77310	73166	246860	104210	213310	153510	192880	289880	188110	169670	0	121570	404020	687450	381430	0	0	187810	467890	220980	100970	313180	0	0	430470	0	0	743370	508800	388490	231750	623000	404250	514760	759130	405570
ASGVPNEVHIYPGNTHAFMNR	frv2_119383	frv2_119383	yes	yes	5.4444e-17	124.73	35572000	34099	73266	34318	202180	599500	143150	23475	29178	139560	0	113430	104500	132820	277720	123890	106620	0	111550	374950	415670	255830	54967	30432	138190	428400	204460	100020	151800	76710	75433	425870	754480	0	679440	595250	265560	108360	451760	219830	358840	534550	383910
FQSWMTQYLSS	frv2_119383	frv2_119383	yes	yes	0.002593	93.839	1985700	0	29976	0	0	0	0	10326	0	0	0	0	0	0	0	0	0	0	0	0	0	0	41775	22840	43879	0	60670	0	0	0	0	0	73157	0	79611	0	0	0	0	0	0	0	0
NHAALISQLSLGFK	frv2_119383	frv2_119383	yes	yes	0.040142	59.68	1585100	0	41578	0	0	0	0	0	0	0	0	0	0	0	0	0	0	0	0	0	87770	0	0	0	0	0	0	0	32702	0	0	0	0	0	0	0	48360	0	78522	0	109630	0	38834
VGLDVAEAQHLFDGLDWPGAVK	frv2_119383	frv2_119383	yes	yes	2.7822e-111	204.78	38215000	71192	123070	77931	309680	886060	268470	0	0	242950	0	216400	107600	182980	257200	187580	115900	0	90501	493610	647570	377710	27397	0	68044	416900	151470	48770	0	0	96230	487140	0	0	825750	248360	361280	164450	579580	259750	436170	0	150400
AAVTNAPRPNAELALSK	frv2_119412	frv2_119412	yes	yes	0.036322	52.527	2508800	8110.8	0	0	0	0	12351	5574.3	12140	21094	0	0	9865.4	0	0	0	9752.8	0	10962	0	39377	35242	36682	16303	20937	77991	42196	0	0	0	44668	29121	76590	0	66586	59093	0	0	0	0	30419	49506	24674
AGVAAGMPVIGLSTR	frv2_119412	frv2_119412	yes	yes	3.0954e-05	109.83	16700000	40865	70776	80282	243800	406550	111070	38188	54949	141170	32364	49093	40046	49955	121590	57401	55234	0	58121	129120	177620	140210	148430	91131	145910	230840	166610	77243	34600	0	83098	125970	205760	0	218000	262430	117480	0	77769	64259	113670	164200	111020
ELLQQIGFNGGNPITEEFFIDTVAGK	frv2_119412	frv2_119412	yes	yes	6.799e-06	75.945	7024300	35147	0	0	174530	302460	63865	0	0	0	0	57279	0	0	0	0	37456	0	31526	0	0	119080	0	0	0	200790	0	0	0	0	0	75530	0	0	144160	0	0	0	0	0	0	0	0
GSLVEFVVQNTEFVQAK	frv2_119458	frv2_119458	yes	yes	0.00050318	114.06	3782000	0	0	0	0	0	44296	0	0	71237	0	0	0	0	135380	55291	52440	0	0	0	0	0	0	0	0	100440	52532	0	0	0	0	173560	0	0	187910	0	0	0	0	0	0	0	55297
GFSIASLVVFPGREELDSVDAGEGLVK	frv2_119505	frv2_119505	yes	yes	1.4638e-11	99.13	2208300	0	0	0	0	0	0	0	0	0	211120	218400	37249	102420	193240	62085	64519	0	0	223890	0	62679	0	0	0	0	0	0	116110	0	0	0	0	0	0	0	0	0	0	0	0	0	0
HLTLGPILTNNETISTTIPISDLR	frv2_119505	frv2_119505	yes	yes	0.016168	43.035	5339400	158960	165950	131840	294130	0	0	0	0	0	405600	208760	100750	132290	227200	0	0	0	0	689810	243290	0	0	0	0	129960	0	0	167620	107300	0	0	0	0	0	0	0	0	0	0	0	0	0
YTHLFHSR	frv2_119505	frv2_119505	yes	yes	0.015809	88.177	52775	0	4090	0	0	0	0	0	0	0	0	0	0	0	0	0	0	0	0	20890	0	0	0	0	0	0	0	0	0	0	0	0	0	0	0	0	0	0	0	0	0	0	0
AASQHGVALIAPDTSPR	frv2_119585	frv2_119585	yes	yes	1.133e-10	124.91	3764800	9648.3	0	19893	0	0	0	0	0	0	0	0	0	9920	32681	0	8823.2	0	0	0	71883	99596	40681	0	0	26175	22828	0	0	0	31856	71353	147490	0	164230	105150	64671	0	0	0	47391	36688	0
AAGITSIGVR	frv2_119638	frv2_119638	yes	yes	0.00040469	140.17	8168100	30470	0	0	86279	146170	23666	7909.3	11900	35183	22454	29821	25667	26908	44284	20939	25470	0	27264	57503	81391	67977	43205	17491	31991	64942	80428	40702	46099	20469	81297	75038	144970	0	195870	136370	68563	35864	121160	54857	58656	85061	95052
MKNDPSFTYEETVQTAISALQSVLQEDFK	frv2_119638	frv2_119638	yes	yes	4.2412e-20	103.14	7659400	21140	37668	32845	127440	292480	0	0	0	0	86141	123710	0	32394	15270	0	74424	0	43935	124100	147040	187230	0	0	0	112290	0	0	41778	0	76815	24466	0	0	148680	40094	0	0	245450	45658	0	0	0
NDPSFTYEETVQTAISALQSVLQEDFK	frv2_119638	frv2_119638	yes	yes	7.5045e-162	215.39	21021000	30414	103720	88709	432530	764200	10254	0	0	0	54590	238670	0	18025	0	0	26104	0	0	604940	848920	148590	0	0	0	121720	0	0	348430	0	141560	34934	0	0	242190	722030	25876	0	966430	0	0	0	0
YLGLLATGMTADAR	frv2_119638	frv2_119638	yes	yes	1.5536e-42	193	19427000	135470	25028	0	92943	1051600	0	14683	0	0	142620	240770	212570	155660	195660	133480	25923	0	0	386590	27715	0	102870	19194	50495	0	66191	38226	0	109110	235960	300340	414260	0	414300	249290	138270	48339	0	0	0	0	0
GTEYQGSIYDAAPTFQSYGVPHGSPDLVK	frv2_119736	frv2_119736	yes	yes	7.1931e-21	109.03	21295000	0	54456	0	202590	0	148150	41707	0	199690	52981	127210	0	117620	259390	135260	132240	0	134810	265930	263130	0	62601	21970	115710	353670	265770	82438	78894	0	0	0	0	0	721680	376330	0	0	350500	0	199840	239180	0
LIAVHAGLEK	frv2_119736	frv2_119736	yes	yes	0.0043464	91.265	678800	0	0	0	0	0	0	0	0	13648	0	0	0	7074.2	12318	0	8280.3	0	6619.5	0	0	0	0	0	9056.1	38093	0	0	0	0	0	19551	39044	0	0	28932	14482	0	0	0	0	0	0
LIIDEGGGYHDKPVAAVVLPSMK	frv2_119736	frv2_119736	yes	yes	0.010116	49.768	6600800	0	0	0	0	0	0	15684	15234	73422	0	18391	0	32544	62344	21993	21106	0	59424	0	92839	0	0	0	45021	123110	89796	43776	0	0	0	95889	120400	0	205210	126020	65651	0	79907	0	0	100780	73323
WRFSYYFLLETR	frv2_119741	frv2_119741	yes	yes	0.00011566	123.01	33187000	0	0	0	0	0	256390	14183	16557	840910	0	0	32749	0	0	90143	0	0	0	0	0	0	0	0	0	1314600	0	208100	0	0	0	195570	0	0	1362000	0	1118000	0	0	559600	903220	118810	978400
AIIKPLQQVLVNSLR	frv2_119752	frv2_119752	yes	yes	4.0382e-29	177.39	142240000	1222500	1713500	1735600	5309000	10307000	96832	11276	0	89145	1378400	489070	487550	294860	201920	94709	0	28272	0	4151300	960500	575820	0	0	0	149970	0	0	1974800	531470	233320	559690	0	0	172170	0	0	1340400	1382200	570520	199230	153630	0
AKFHVSYNGK	frv2_119752	frv2_119752	yes	yes	0.019395	69.275	393750	4022.1	0	0	15622	41075	0	0	0	0	16713	9121.2	6341.6	6191.1	0	0	4131.2	0	0	11851	0	0	0	0	0	0	0	0	12057	0	0	0	0	0	0	0	0	7371.7	9716.2	0	0	0	0
ANVYLDSSGK	frv2_119752	frv2_119752	yes	yes	0.019892	70.412	720250	12644	23452	17872	52449	54126	3665	0	0	0	11026	0	4697	2844.6	0	0	0	0	0	0	0	0	0	0	0	0	0	0	0	0	0	0	0	0	0	0	0	22826	0	8003.9	0	0	0
FHVSYNGK	frv2_119752	frv2_119752	yes	yes	0.00083571	123.69	2846300	35872	47991	34670	122490	92141	6648.8	0	0	5922.3	40143	16371	0	9171.1	0	7682.3	5649.9	0	0	182190	41249	21409	0	0	0	8226.1	3123	0	91256	29974	45954	10532	29284	0	30199	0	0	66106	41010	0	0	9767	0
GITDINIAVESGEFDTEGLLAK	frv2_119752	frv2_119752	yes	yes	7.3779e-98	202.65	70999000	945830	1497200	1191500	1272500	1414800	209840	19527	0	191540	1147800	766860	152620	443050	0	134950	300220	0	182030	3443100	1034100	664340	0	0	0	224680	0	0	883820	102170	173120	338020	0	0	0	0	0	0	1461200	725530	0	0	0
LGALLDTMNALK	frv2_119752	frv2_119752	yes	yes	1.0881e-71	223.08	178110000	1518300	1875900	1395000	4688600	3548100	405400	84200	126580	411420	1287300	654630	339610	275040	383510	208770	132520	0	12188	7850000	1844500	947090	220170	128240	267000	472000	20034	95331	2697800	1024100	568690	512770	494500	0	570080	429470	367750	2907600	2241200	1149400	518780	802100	491030
LTILNNMITYHPESSAQLALGAAFGLVAPK	frv2_119752	frv2_119752	yes	yes	7.035e-22	108.79	129900000	519950	2141900	1673000	5065900	6257800	87378	0	0	0	675910	268840	34114	0	0	0	0	0	43904	5861600	691200	818380	0	0	0	69909	0	0	1820700	0	0	0	0	0	0	0	0	0	1259300	513790	0	0	0
NLGLNVVK	frv2_119752	frv2_119752	yes	yes	0.0059268	98.458	5728800	80797	162430	115780	286620	183090	14053	0	0	16968	106560	38441	25447	24733	15549	23880	0	0	0	301130	58897	35576	13991	0	0	0	0	0	129650	63312	0	22784	51043	0	0	0	0	132410	82389	36340	0	25735	0
SLFYVETADRPGLLVDLVK	frv2_119752	frv2_119752	yes	yes	1.1318e-145	241.11	292760000	2474900	2198000	2801200	6593300	10677000	658960	54584	62162	568630	4564500	2401000	976560	1024700	724690	803110	718760	0	539570	11102000	2638300	2042200	0	0	0	739740	129000	45197	4137000	1291900	556200	936100	67471	0	957340	369390	342140	2924500	4493900	2028500	943900	393080	757230
YFLTRPSTEESSF	frv2_119752	frv2_119752	yes	yes	2.6936e-21	182.37	94410000	914410	1265200	1261700	2322300	2917400	190340	61673	90321	184570	1237900	634490	454020	312310	365490	248330	154040	0	120950	4184400	949760	436010	138680	55294	60423	236430	67099	47795	1370000	630370	681880	285560	486130	0	399040	312030	157800	1546500	876540	455790	185710	292110	166730
FVSSDGLATLNVITR	frv2_119784	frv2_119784	yes	yes	1.8877e-29	181.97	17456000	116030	148530	190620	320650	433860	35508	18207	27531	58338	202170	96317	72289	52010	57500	40745	34884	0	32319	711060	163020	98432	47511	13564	0	70793	0	0	264840	102540	79937	0	0	0	0	59576	47273	252670	236570	165180	0	60439	59393
FYGDGFAIR	frv2_119784	frv2_119784	yes	yes	0.0012666	96.034	2385600	31521	62990	37409	86772	0	0	0	0	0	48414	23601	15647	7490.3	0	0	0	0	0	117170	0	0	0	0	0	0	0	0	49789	22425	44436	0	0	0	0	0	0	91960	63958	0	0	0	0
ITFLQVQDISGLGSLK	frv2_119784	frv2_119784	yes	yes	8.6397e-85	217.65	17951000	128020	188070	157570	342640	455250	35614	0	0	48251	160850	86039	43549	25880	0	0	30114	0	0	828970	304710	182790	0	0	0	0	0	0	377220	117360	0	103360	0	0	0	0	68134	348370	238820	159170	0	62714	46309
LFIPGGSTVYSAR	frv2_119784	frv2_119784	yes	yes	0.028993	60.161	3059700	62159	0	0	0	355080	0	0	0	19965	0	0	59284	0	0	0	31682	0	0	0	0	66820	0	0	0	0	0	0	0	93170	86829	0	0	0	0	0	0	0	194990	78728	0	0	0
VIIAGATAPEYKWDTDGVK	frv2_119784	frv2_119784	yes	yes	0.015435	55.815	2861800	0	33626	71183	93899	228460	0	0	0	0	154460	78594	57396	28828	43698	26685	0	0	10713	157670	0	0	0	0	0	0	0	0	0	0	0	0	0	0	0	0	0	90687	0	51498	0	0	0
VRDDWLEQDFATWIGANR	frv2_11987	frv2_11987	yes	yes	1.2677e-05	107.13	4935100	49908	31824	0	122810	303250	43774	0	0	0	110690	92081	0	42799	69099	26634	40625	0	26546	283780	89255	85588	0	0	0	0	0	0	138710	23112	0	0	0	0	0	0	0	58264	0	0	0	0	0
LQPVANTPYDFLTPK	frv2_119937	frv2_119937	yes	yes	0.00057222	94.454	4151100	0	0	0	0	0	47826	0	0	0	0	0	0	0	0	0	0	0	0	0	0	80079	94628	44950	53024	0	44924	0	0	0	49549	111290	264570	0	183090	116770	0	0	0	0	0	0	0
YGGIALETQGFPDSVNLPNFPSQIVKPGETYK	frv2_119937	frv2_119937	yes	yes	0.00055697	49.94	7768700	0	0	0	0	297350	76735	0	0	0	0	0	49490	102030	156920	93535	114630	0	0	0	0	173130	0	0	0	211130	0	0	0	0	0	222930	0	0	288890	0	0	0	0	0	0	0	0
IGNLGNSAVEVSR	frv2_119947	frv2_119947	yes	yes	2.0797e-05	114.7	5318000	0	0	0	0	0	38339	0	0	0	0	0	0	0	0	0	38649	0	37962	0	0	123110	84289	0	0	0	0	0	0	0	0	0	201010	0	0	0	0	0	151760	98171	111500	0	101530
YEWWSEALHGVSNIGPGTR	frv2_119947	frv2_119947	yes	yes	5.9774e-19	132.67	35869000	88336	116300	86621	488150	1154100	188660	0	0	101830	0	102390	112610	116490	151080	159450	150430	0	87057	0	0	0	0	0	49968	223190	0	0	0	0	0	312480	222410	0	526490	141730	144890	0	508010	0	414820	218930	172310
EDVLQANDPVDILLLPGLAFDR	frv2_119963	frv2_119963	yes	yes	2.2844e-34	148.33	11275000	50160	0	0	66525	0	118740	0	0	108310	0	25764	7140	31083	33778	16460	28906	0	65118	78866	153690	134910	0	0	72801	211320	156020	70287	72357	22560	16000	107430	83956	0	270170	223740	153490	0	89760	112930	149190	0	125140
SQQDTAIQDIVLGAPWFK	frv2_119963	frv2_119963	yes	yes	3.7441e-24	140.35	7743600	0	63613	58920	135930	290170	67642	0	0	48005	47013	0	45413	71784	86814	52137	0	0	0	311690	127770	76523	0	6254.5	0	0	45025	0	0	31934	0	139610	69927	0	0	0	71172	52508	0	0	0	34625	55593
DLVLSNGALIPLLSQLNEQAK	frv2_120262	frv2_120262	yes	yes	0.010492	54.828	6623500	0	24435	0	48411	182340	41832	0	0	46338	0	0	30379	19168	45042	26933	28455	0	32723	0	86428	88840	20073	0	0	101860	43464	0	0	0	0	52636	42162	0	147850	0	45826	0	108520	53100	90641	29984	50910
FVEFLVR	frv2_120262	frv2_120262	yes	yes	0.063722	66.799	1945900	0	0	0	57718	0	0	0	0	0	0	10878	0	0	0	0	0	0	15492	0	31949	0	0	0	0	52540	0	0	0	0	29264	0	0	0	0	47841	52671	0	0	49209	0	0	35283
SPPIEEVIQSGVVPR	frv2_120262	frv2_120262	yes	yes	0.051992	53.038	6190300	0	0	0	0	158450	0	0	0	49881	0	0	0	0	0	29070	23574	0	25324	0	0	0	36366	0	0	103880	58437	0	0	0	0	0	129750	0	168130	153600	0	0	0	102510	127870	134200	0
FTSQFSDEIKIPR	frv2_120324	frv2_120324	yes	yes	0.065779	50.786	2416400	32146	31240	59719	134300	170440	0	8768.5	9259.8	0	0	25938	0	22118	43135	16087	0	0	0	0	26986	0	13255	0	0	40022	0	0	59973	25271	24103	43649	0	0	31047	0	0	92584	0	27825	25223	0	34895
GSVIHLVR	frv2_120324	frv2_120324	yes	yes	0.0025985	105.14	2233500	11448	12310	13936	39564	73838	10778	0	5096	11405	18511	11629	8322.9	8359.2	17783	8462.1	8826.4	0	9645.6	83471	30775	19935	17594	5218.5	11945	25297	19427	0	37487	15169	21447	16680	0	0	0	33310	0	20113	27538	0	15768	0	15182
SVLDLYVGEESFDK	frv2_120324	frv2_120324	yes	yes	0.0044677	77.204	8848500	105280	92153	69577	130800	0	88894	30471	35121	79469	0	73549	0	0	0	0	0	0	0	0	0	0	0	0	42034	0	84167	0	0	109170	0	108540	0	0	126000	0	102210	182330	169500	0	0	177860	0
DIYTGDRVEIVILNGSGIHR	frv2_120472	frv2_120472	yes	yes	0.0002377	83.666	6837700	0	0	0	0	0	0	0	0	0	0	0	0	0	0	0	0	0	322950	0	0	0	0	0	0	0	0	0	0	0	0	0	0	0	1066100	718700	0	0	0	0	0	0	0
FFPYYSFNVLGGLDSEGK	frv2_120472	frv2_120472	yes	yes	5.354e-40	171.98	34908000	66253	118970	111160	300770	587700	241040	22324	20564	173360	57728	0	93265	173960	337180	160040	167550	0	148400	272360	220980	435920	0	18686	67724	409290	200750	144790	115170	50779	149260	262570	132050	0	544270	0	213910	69185	337980	198370	1182600	207870	335370
HLTYQHQHNK	frv2_120472	frv2_120472	yes	yes	0.0067189	90.827	91052	0	0	0	0	0	0	0	0	0	0	0	0	0	0	0	0	0	0	0	0	0	0	0	0	0	0	0	0	0	0	0	0	0	0	0	0	0	0	0	0	0	0
MSSGYNILTR	frv2_120472	frv2_120472	yes	yes	1.2074e-11	180.66	22356000	41876	74270	62686	281640	412250	101770	59649	81536	149510	0	0	78101	92705	190910	0	69484	0	0	114470	189540	124850	256470	106130	164590	345130	237060	85075	0	48152	138920	255800	545070	0	410350	436300	193840	96775	0	125480	241030	362830	225420
RFFPYYSFNVLGGLDSEGK	frv2_120472	frv2_120472	yes	yes	0.0063623	63.392	10046000	0	0	0	0	391050	80854	0	0	66453	64112	164620	61611	70014	186950	92917	59104	0	0	0	0	120980	0	0	0	0	0	0	80133	0	0	178420	0	0	174060	0	74994	0	314460	0	0	0	72407
SPSPLLLPAQDAVTPLSETEAVDLVK	frv2_120472	frv2_120472	yes	yes	1.0687e-102	180.9	145830000	362360	324540	460080	723420	2255200	796660	282010	324550	875740	390480	711030	622170	885020	1485300	876980	654540	0	518370	408980	1060200	792440	371010	227430	826570	1895100	1311600	305230	476820	328850	159190	1510500	2072700	823440	2365700	1668600	1222800	491140	2102000	1086900	1625800	1648300	1206300
VGYSSQGSGSTLIMPFLDNQLK	frv2_120472	frv2_120472	yes	yes	2.3658e-126	219.61	92882000	186630	207060	241270	553410	1411700	556770	138690	149390	588810	197560	499690	304130	482720	612140	405430	484310	12437	448720	419230	813640	754520	185400	66562	550850	1090900	764690	400810	340380	149620	144070	993410	1161600	0	1558000	929870	824250	288430	1154900	651740	997120	1071200	1012700
EFGLSDNAMFHQLDVTDPTSITSLVDFVK	frv2_120501	frv2_120501	yes	yes	3.8089e-06	70.449	2874800	0	0	0	0	0	0	0	0	28756	0	0	0	0	0	0	0	0	24202	0	0	0	0	0	0	71337	0	0	64541	0	0	0	0	0	148300	0	0	0	0	0	0	0	0
ETTEAFLPLLNLSNSPK	frv2_120501	frv2_120501	yes	yes	0.012109	62.525	9665400	0	0	0	0	229660	49567	13863	24461	44097	0	77966	49113	76240	68492	61124	42194	0	67569	0	98938	100250	55717	23095	54620	105840	64050	0	0	0	0	97243	0	0	211570	142010	99265	0	0	58139	81675	67473	0
IVNVSSQAGLLK	frv2_120501	frv2_120501	yes	yes	0.0063431	78.287	5946700	20291	27359	34605	84902	162430	33594	8142.2	20957	34992	22632	23120	0	0	0	26830	0	0	21058	71258	0	0	72152	0	0	0	69394	27247	35654	0	0	0	162760	0	124560	117110	0	0	69738	26488	66641	78834	36871
LDILVNNAGVSGVNPYETVGSTVDWEQLTQTYEMVQK	frv2_120501	frv2_120501	yes	yes	0.0013445	38.225	4003300	0	0	0	0	0	0	0	0	0	0	0	0	45786	0	0	0	0	0	0	137380	0	0	0	0	133230	0	0	0	0	0	0	0	0	148270	0	0	0	0	0	0	0	0
NTGMLSVDQGAASVVR	frv2_120501	frv2_120501	yes	yes	0.053103	64.588	0	0	0	0	0	0	0	0	0	0	0	0	0	0	0	0	0	0	0	0	0	0	0	0	0	0	0	0	0	0	0	0	0	0	0	0	0	0	0	0	0	0	0
NLMLDLVSTLEDR	frv2_120535	frv2_120535	yes	yes	1.0766e-29	187.16	8839000	77897	54331	36755	151690	266870	29019	0	0	41066	53730	27018	25929	13193	25657	26167	0	0	33056	325040	164220	106770	0	0	0	75712	0	0	103530	0	0	68591	0	0	151000	0	35674	47457	142620	57813	40357	0	0
DDDGHGTHTLTTAAGSIVEEASLFGLASGTAR	frv2_120574	frv2_120574	yes	yes	0.00029047	50.865	8079200	0	245950	0	0	0	140590	33165	0	0	0	0	0	0	0	0	0	0	0	0	0	208540	0	0	0	219360	61993	0	0	0	0	171780	0	0	257040	898990	0	0	0	0	419970	0	0
QQSQVIIGILDTGIWPETK	frv2_120574	frv2_120574	yes	yes	1.0217e-12	123.42	2929600	0	0	0	0	0	66710	0	0	0	0	0	0	36112	86660	38919	36799	0	0	0	0	0	0	0	38693	113960	0	0	0	0	0	0	0	0	0	0	0	0	0	0	0	0	0
TPQFLGLPQTNTLLPQSK	frv2_120574	frv2_120574	yes	yes	0.0051858	66.893	6519000	0	25469	0	86359	225160	60616	0	22068	0	0	0	22445	37666	50338	39441	37891	4781.3	0	0	0	0	78418	52690	85590	133920	0	0	0	0	0	0	0	0	0	0	0	0	0	55729	0	95329	63862
EAVNVSLGNLLTYPFVR	frv2_120584	frv2_120584	yes	yes	6.377e-69	198.51	47705000	152900	201670	191350	571270	718910	449040	13087	0	366970	0	0	108370	173750	208070	160330	198980	0	201120	370060	639340	366590	0	0	78915	499660	212410	146040	191130	0	0	600180	136420	0	920740	320570	496550	129110	853850	408770	653670	33165	346930
FHVAAVGVGISGR	frv2_120630	frv2_120630	yes	yes	0.0010594	92.295	485950	0	0	0	0	0	0	0	0	0	0	0	0	0	0	0	0	0	0	0	0	17733	0	0	0	0	0	0	14597	0	21339	0	61839	0	0	0	0	0	0	0	0	22059	0
SMGQSTGLTLTQLLPTIIK	frv2_120630	frv2_120630	yes	yes	6.2254e-70	191.78	19151000	66034	60263	54154	0	0	93527	9534.1	0	190240	0	155080	121980	169650	87648	131480	166170	0	117890	0	192320	83206	0	0	42061	213620	116770	53749	102440	52857	0	194470	270220	0	485760	245470	288460	37685	247590	101460	114020	159970	144810
ANDTIKLDLEQNKITDFIK	frv2_120693	frv2_120693	yes	yes	0.0349	95.751	937440	0	0	0	0	0	0	0	0	0	0	0	0	0	0	0	0	0	0	0	0	0	0	0	0	0	0	0	0	0	0	0	0	0	119640	0	0	0	0	0	0	0	0
SFVSDYPIVSIEDPFDQDDWEHYSK	frv2_120712	frv2_120712	yes	yes	0.0032813	50.255	2088600	0	0	0	0	0	0	0	0	0	0	0	0	0	0	0	0	0	0	0	0	0	0	0	0	0	0	0	0	0	0	0	0	0	0	0	0	0	0	0	0	0	0
VQIVGDDLLVTNPK	frv2_120712	frv2_120712	yes	yes	0.012344	67.646	1516800	19866	24131	0	94066	0	62082	19629	27901	0	0	0	0	0	0	0	0	0	0	0	39962	0	0	21095	0	0	0	0	0	0	0	0	0	0	0	0	0	0	0	0	0	0	0
DLVALSGGHTIGQAR	frv2_120734	frv2_120734	yes	yes	2.7152e-06	115.09	1308800	0	0	0	0	0	0	0	0	0	0	0	0	10948	45599	8079.8	0	0	0	0	0	0	0	0	0	0	0	0	0	0	0	0	35709	0	0	0	0	0	0	39180	99780	172160	99753
AQNMESLPFFNQVTADLTPLNTR	frv2_120827	frv2_120827	yes	yes	3.395e-50	152.63	36749000	338210	350770	443090	781890	1205700	72195	0	0	42742	405280	224950	187030	137960	314240	147500	95320	0	0	1285400	258570	0	0	0	0	0	0	0	576490	290790	0	0	0	0	169870	0	0	435740	632380	244810	0	0	0
DASTIKEELLEAIASLDR	frv2_120827	frv2_120827	yes	yes	3.2064e-39	171.85	18917000	139650	130490	107450	340950	934540	54848	0	0	42302	353840	245390	152140	166630	268710	195420	82394	0	50342	857910	70999	76702	0	0	0	72455	0	0	346530	123440	0	50118	0	0	66909	0	0	249190	476760	136440	112230	0	0
DASTIKEELLEAIASLDRGADATPEDQQSVDQIAR	frv2_120827	frv2_120827	yes	yes	8.5349e-07	66.19	2246400	0	0	0	0	0	0	0	0	0	238050	196430	71513	90213	0	0	60164	0	0	0	0	0	0	0	0	0	0	0	0	0	0	0	0	0	0	0	0	0	0	0	0	0	0
IAGFIPVK	frv2_120827	frv2_120827	yes	yes	0.001144	114.72	4331300	43342	82282	52418	203420	124510	0	0	12720	12928	55430	0	0	15699	15646	0	0	0	0	160110	45641	0	0	0	0	0	0	0	125810	42387	29107	0	0	0	0	0	0	123750	0	0	0	0	0
IAGFIPVKAPDTAR	frv2_120827	frv2_120827	yes	yes	0.0017823	84.169	5517900	0	63502	0	0	0	0	0	20686	0	116660	0	0	69955	176420	0	46380	0	12333	0	47077	49909	45993	0	0	0	0	0	118020	101060	237790	0	0	0	0	0	0	255100	0	76628	0	0	0
MVDPSYRIPA	frv2_120827	frv2_120827	yes	yes	0.009634	107.21	1022400	0	12595	37819	68557	0	0	5735.8	0	0	48190	19624	21365	14743	0	0	0	0	0	24322	0	0	0	0	0	0	0	0	0	18014	0	0	0	0	0	0	0	0	0	0	0	0	0
SSLLDGKWELIYTTSQSILQTK	frv2_120827	frv2_120827	yes	yes	7.1169e-18	128.67	28322000	254100	315240	420580	857310	1072000	82627	0	0	74720	468480	254180	163270	149750	285190	164170	0	0	42234	1225700	0	159670	0	0	0	95676	0	0	525050	168100	0	0	0	0	96179	0	0	189310	365850	152900	0	0	0
SVTNYQAINADTLR	frv2_120827	frv2_120827	yes	yes	1.0941e-21	167.92	8807700	144880	184500	217800	415710	0	0	0	0	0	231740	0	0	0	0	0	0	0	0	602010	0	0	0	6947	0	0	0	0	171010	0	127450	0	0	0	0	0	0	320410	0	0	0	0	0
NGFDFSGASQSFNVLAEYLFGK	frv2_120839	frv2_120839	yes	yes	4.0411e-05	86.357	1030500	0	0	36909	63727	0	0	0	0	0	0	0	0	0	0	0	0	0	0	95637	0	0	0	0	0	0	0	0	63434	0	0	0	0	0	0	0	0	0	34933	0	0	0	0
EGVIQHSTINNLAIGR	frv2_120919	frv2_120919	yes	yes	1.9072e-22	157.37	13105000	96765	46951	33246	92495	120040	57430	18390	32022	72465	67320	24904	29808	25021	26911	7964.5	5891.8	0	27680	393260	168950	47569	12919	0	32869	40005	80488	26805	179270	94031	0	105900	157960	0	179930	43341	60544	262340	245350	24868	80623	214830	0
GLFIIDKEGVIQHSTINNLAIGR	frv2_120919	frv2_120919	yes	yes	5.6845e-88	180.08	71499000	497080	400670	343490	1224900	0	203040	31441	39157	247440	953670	463760	293170	406940	1150100	338110	260560	0	297600	1967700	630410	359430	0	0	0	411520	136960	58038	881030	491020	154680	452640	278980	0	551160	0	352910	675140	1170400	496210	653210	532750	412450
LSDYIGKK	frv2_120919	frv2_120919	yes	yes	0.005295	114.5	594650	0	0	0	0	0	0	0	0	0	0	0	0	0	11758	0	0	0	0	0	0	0	0	0	0	0	0	0	0	0	0	0	0	0	0	0	0	0	0	0	0	0	0
FFNLEEGGAFTFSGVDDILQVL	frv2_120944	frv2_120944	yes	yes	0.032886	40.315	224920	0	0	0	20117	0	0	0	0	0	0	0	0	0	0	0	0	0	0	28466	0	0	0	0	0	0	0	0	0	0	0	0	0	0	0	0	0	0	0	0	0	0	0
ISATISVGDKLPESTFSFLDPAGEVQTITVSDLTK	frv2_120944	frv2_120944	yes	yes	0.00083403	45.536	304910	0	0	0	0	0	0	0	0	0	0	0	0	0	0	0	0	0	0	0	0	0	0	0	0	0	0	0	0	0	0	0	0	0	0	0	0	0	0	0	0	0	0
LPESTFSFLDPAGEVQTITVSDLTK	frv2_120944	frv2_120944	yes	yes	7.0447e-38	137.9	7791600	57349	0	0	0	0	0	0	0	0	83352	95697	46054	42932	62259	31846	0	0	0	366260	0	0	0	0	0	0	0	0	136480	99338	0	0	0	0	0	0	0	306690	0	0	0	81115	0
KVLSALGFNDEKAEEIAK	frv2_121005	frv2_121005	yes	yes	0.00029338	99.915	5604700	50398	48756	40180	177060	443110	15562	0	0	0	73146	91006	38905	62770	73276	37925	21157	0	13412	473740	79072	44835	0	0	14502	0	0	0	167680	64111	56680	40210	0	0	0	0	0	195690	245320	0	0	0	0
SDFHFSSPIIPSLTKPLQK	frv2_121005	frv2_121005	yes	yes	1.6552e-50	174.68	24333000	100700	198650	222170	769440	1094000	41304	0	0	93487	244660	149010	141710	129990	230120	0	79572	0	57221	1025700	75054	136130	0	0	0	104390	0	33001	276330	154150	0	0	0	0	0	0	0	441040	441850	263010	117140	96887	74257
SGEEGETNVTHLLIGIWSQEESAGR	frv2_121005	frv2_121005	yes	yes	1.0879e-47	145.44	22503000	289720	158020	176950	229870	462500	102040	0	0	76393	215450	261860	89791	122480	0	108250	92924	0	73559	667890	424480	214790	0	0	0	172410	121660	0	290300	226530	0	169040	0	0	188520	0	46255	354710	286570	172040	190550	0	0
VGTETLLMGILVEGTSK	frv2_121005	frv2_121005	yes	yes	1.1481e-138	226.06	7424100	0	0	171700	483600	0	0	0	0	0	0	112350	84062	122820	144570	0	0	0	0	0	0	0	0	0	35197	0	0	0	302470	0	0	0	0	0	57420	0	0	0	203490	0	0	0	0
FDPIGPPGLPGFEPNR	frv2_121037	frv2_121037	yes	yes	2.3271e-10	125.67	24823000	48957	0	71401	275440	0	173470	55975	109910	167450	65934	96801	99254	132040	189790	134800	0	0	81648	0	181490	152490	161500	89984	149280	271740	235800	117870	98984	68176	105960	0	556090	0	0	497430	261040	109900	309340	168790	217280	467910	194910
DMKPETFASLVSAILYEK	frv2_121182	frv2_121182	yes	yes	1.2565e-16	131.18	10715000	0	0	0	0	553450	78939	0	0	190770	0	0	37112	0	0	74067	0	0	45216	67074	0	0	0	0	0	264360	106830	0	112740	0	0	116780	0	0	134070	0	145670	0	213420	152170	202340	0	51684
DMKPETFASLVSAILYEKR	frv2_121182	frv2_121182	yes	yes	0.015995	89.507	0	0	0	0	0	0	0	0	0	0	0	0	0	0	0	0	0	0	0	0	0	0	0	0	0	0	0	0	0	0	0	0	0	0	0	0	0	0	0	0	0	0	0
LFIGLSGLATDSQTLYQR	frv2_121182	frv2_121182	yes	yes	2.8481e-07	113.81	7547200	0	0	0	0	110700	0	0	0	47492	27746	79703	40395	29397	0	28879	0	0	0	0	278980	156730	0	0	0	0	0	0	0	0	0	0	50689	0	302890	100210	133100	0	187810	121240	0	0	0
LGVQLQTIATDFQR	frv2_121182	frv2_121182	yes	yes	5.0864e-106	240.73	41434000	86166	169480	144880	310360	778840	103590	27116	35694	206950	111210	234160	127810	135860	257620	151900	169520	5695.3	123580	462750	730330	344830	164710	40338	107970	375670	214040	127560	262200	121820	138520	462930	616400	0	763580	464520	344130	182550	695120	367850	427740	414740	306950
GTQLLSNIFSHPAFDAVQDEVEVSFGNTGGFK	frv2_121222	frv2_121222	yes	yes	3.3372e-15	90.757	2633200	0	0	0	123540	0	0	0	0	0	125670	0	0	0	0	0	0	0	0	644680	0	0	0	0	0	0	0	0	87184	0	0	0	0	0	0	0	0	0	0	0	0	0	0
SFPTEFTWELNDDTPQGHLPLTNALR	frv2_121222	frv2_121222	yes	yes	0.014928	41.45	5775900	0	54512	96749	403760	468940	0	0	0	0	164130	156030	0	0	0	34482	0	0	0	0	237850	0	0	0	0	0	0	0	183420	0	0	0	0	0	0	0	0	0	0	0	0	0	0
ENDQMQAVMGTFDGIIDTVSALHPLTPLLGLLK	frv2_121226	frv2_121226	yes	yes	0.022516	32.195	413380	0	0	0	38632	0	0	0	0	0	0	0	0	0	0	0	0	0	0	0	0	0	0	0	0	0	0	0	0	0	0	0	0	0	0	0	0	0	0	0	0	0	0
LVMVGAPDKPLELPAFSLIGGR	frv2_121226	frv2_121226	yes	yes	0.00069335	69.361	5996400	0	0	40938	200430	0	35669	0	0	59526	0	0	0	0	0	17851	0	0	29917	0	0	82562	0	0	0	53987	50353	0	0	0	0	99213	0	0	99467	0	0	0	0	0	0	0	0
FNFDNPQLR	frv2_121282	frv2_121282	yes	yes	0.00072953	133.23	1981900	0	0	0	0	0	0	0	0	0	0	0	0	5309.9	0	13570	13391	0	0	0	0	24820	0	0	0	0	0	0	0	0	50491	53319	0	0	127400	76109	25877	0	147970	142780	162710	89346	81384
GASLLEAFYK	frv2_121282	frv2_121282	yes	yes	0.00089346	118.03	1448200	0	0	0	0	0	0	0	0	0	0	0	0	0	0	0	0	0	0	0	0	0	0	0	0	0	0	0	0	0	0	56724	0	0	0	81453	0	0	179750	0	135440	183250	52924
GIVVYDGASQTQTPIMPILPDSHDTPLAHK	frv2_121282	frv2_121282	yes	yes	8.8161e-85	159.76	36572000	0	0	0	0	0	0	0	0	0	0	47501	62972	171990	261420	221950	157850	0	203070	0	0	0	0	0	0	0	0	0	0	0	0	841690	544770	0	1329600	861650	133000	229160	2165400	1780800	2925100	2912700	1829500
IINAALDEQHFFK	frv2_121282	frv2_121282	yes	yes	1.0351e-05	117.7	7602200	0	0	0	0	0	0	0	0	0	0	22840	32868	26693	111590	120970	38520	0	17504	0	0	0	0	0	0	0	0	0	0	0	65393	172250	0	0	219850	118130	67450	49955	800090	644500	439800	0	386500
NTIAVPVGGWSVIR	frv2_121282	frv2_121282	yes	yes	1.0758e-08	122.96	17310000	0	0	0	0	0	0	0	0	0	0	61113	101120	85482	172260	182940	187150	6552.6	139290	0	0	0	0	0	0	0	0	0	0	0	155440	301120	316480	0	461740	260220	147590	128180	1055400	842070	1170700	732540	490590
TNQVVGSYYMVATPYR	frv2_121282	frv2_121282	yes	yes	1.8326e-135	241.66	12491000	0	0	0	0	0	21711	0	0	0	0	51103	115100	139820	233460	191550	136190	0	133730	0	0	0	0	0	0	0	0	0	0	14000	81484	242510	314280	0	345800	243750	60441	58048	478680	661650	949200	733100	637640
VYNSMIMAYINAGEPTK	frv2_121335	frv2_121335	yes	yes	0.0022408	77.372	31829000	222180	208220	261840	374440	649540	392410	50956	36757	544900	0	0	0	0	556610	0	0	6296.8	0	661530	699250	627210	0	138310	0	770090	668620	0	0	0	0	624270	511150	0	0	0	0	0	0	432940	0	35979	571650
LDHQVQFGQHVALLGSAK	frv2_121349	frv2_121349	yes	yes	0.065091	39.853	964970	0	0	0	49215	0	0	0	0	0	39375	0	0	8814.5	0	0	0	0	0	71324	29020	0	0	0	0	0	0	0	39587	0	0	0	0	0	0	0	0	47079	0	0	0	0	0
NNVPLNWTPNGWVR	frv2_121349	frv2_121349	yes	yes	0.0024974	82.069	6935400	45577	76688	79847	184180	356980	0	0	0	0	121720	0	79855	0	0	0	0	0	0	376480	87278	80265	24203	0	0	0	0	28009	85532	32509	63966	0	0	0	0	0	41732	97765	160910	0	0	0	0
TWDTSAGSSPFVGEWQGK	frv2_121349	frv2_121349	yes	yes	0.013788	78.228	2371400	0	0	0	0	0	0	0	0	0	0	63284	58009	45597	43163	40501	21466	0	0	338930	0	0	0	0	0	37227	0	0	0	0	0	0	0	0	0	0	0	0	140490	0	0	0	0
DIALHLASLGAK	frv2_121371	frv2_121371	yes	yes	0.023727	63.091	1006400	0	0	0	0	105770	0	0	0	0	0	0	19840	0	32686	0	16428	0	33113	0	0	0	0	0	0	54469	0	0	0	0	0	0	0	0	0	0	0	0	0	0	44790	0	0
DISPVVGFLATDSAEWINGQIIR	frv2_121371	frv2_121371	yes	yes	4.6952e-22	123.17	4355800	0	0	0	0	0	16925	0	0	49386	0	29481	40390	109030	101360	69099	128590	0	119470	0	0	0	0	0	33442	55803	101660	0	0	0	48277	146520	44625	0	125230	138080	143670	0	0	71369	0	0	0
LVINYTSNSDLADSVAAHINANQATPR	frv2_121371	frv2_121371	yes	yes	0.00023586	58.802	13293000	0	0	0	0	242460	71139	0	0	0	0	86038	76492	0	258980	186910	201160	0	227010	0	172540	0	0	0	127450	288630	146020	104920	0	0	0	343280	340410	0	618880	286990	256890	0	0	0	250900	216360	0
FVQTTPLIVNPVSTGAVSVEGVPSNEYFINVK	frv2_12138	frv2_12138	yes	yes	4.4025e-07	70.109	100370000	0	0	0	0	0	0	0	0	0	0	979800	883260	2158100	3324400	1807800	2318700	24739	803480	0	925360	1231300	228650	49383	365890	1031500	0	0	0	366380	646500	2988400	2650100	0	4116300	1013800	620000	0	6018000	3434900	3271900	1830800	2484600
QGFTNLLVGSDKLPK	frv2_12138	frv2_12138	yes	yes	2.7235e-22	173.19	28248000	0	0	0	0	0	0	0	0	0	0	0	358910	473910	301350	445230	446830	0	138830	0	167040	370730	205270	101460	162510	182300	0	0	0	55849	406560	894740	918370	0	1125600	722860	203200	316150	1524700	1076200	954110	1316500	315590
RVALEAFGNYVESIVGDTSDNR	frv2_121393	frv2_121393	yes	yes	7.6369e-08	101.23	3879800	97961	73289	0	0	625580	0	0	0	29588	0	121030	0	58484	47988	0	0	0	0	460470	138020	53145	0	0	0	0	0	0	181560	68487	0	0	0	0	0	0	0	0	0	0	0	0	0
FQSVGNITLHFPDNFGGDTTK	frv2_121399	frv2_121399	yes	yes	0.043827	39.364	7874900	0	0	0	0	0	118980	0	32741	107920	0	51789	38128	90194	220050	77704	64803	0	76918	0	0	130720	0	0	104010	321340	115590	90872	0	0	0	146140	0	0	422870	187150	204690	0	0	0	0	0	154920
IHYIGLK	frv2_121399	frv2_121399	yes	yes	0.017225	91.093	995570	0	0	3906	11529	0	5161.4	0	0	10276	0	0	0	4625.9	6020.2	4007.1	4974.9	0	0	0	14820	7391.2	10971	0	11031	19596	14802	10578	0	0	0	14590	30154	0	45955	31731	0	0	8816.2	3452.7	0	7465.5	0
LNTSGEHLESNEGDPELLVFIPFTSDVK	frv2_121399	frv2_121399	yes	yes	4.4271e-08	82.302	29244000	0	0	0	0	0	270430	88583	69101	200700	0	217500	126050	277160	712760	348560	276380	0	331770	0	352630	415630	0	0	166040	1111900	584980	211300	0	0	0	499900	293440	276230	826190	404460	260520	0	0	0	0	0	0
LLNQIMELK	frv2_121444	frv2_121444	yes	yes	0.0039185	94.409	4360100	0	0	0	93498	0	21365	19038	26865	34703	16375	18424	22558	29120	51312	26393	25211	0	33456	0	47762	42476	0	43558	62949	78190	88170	32061	0	14900	48474	61296	0	0	0	0	0	0	87233	0	42884	150830	58633
EFVDNPNGLFSAQASPKPPPAMYTIVEGMR	frv2_121468	frv2_121468	yes	yes	7.5194e-06	64.547	13068000	118140	145480	150620	405770	839690	0	0	0	0	251760	123710	0	58552	85486	60769	0	0	0	814600	0	96159	0	0	0	92331	0	0	318620	124510	0	0	0	0	0	0	0	171110	0	0	0	0	0
FNVVIDNDAVSSLDLSPFQAATGMK	frv2_121521	frv2_121521	yes	yes	0.004216	52.465	2568000	0	0	0	0	0	0	0	0	0	91220	0	0	0	0	0	0	0	0	367920	0	0	0	0	0	0	0	0	0	0	0	0	0	0	0	0	0	0	0	0	0	0	0
LDAAYPWLPVLLDWR	frv2_121521	frv2_121521	yes	yes	3.7082e-05	109.48	11592000	84917	184580	209990	451510	530270	13511	0	0	14838	191540	0	35615	0	0	0	0	0	0	584720	97626	96233	0	0	0	0	0	0	240590	31415	0	0	0	0	0	0	0	31955	0	0	0	0	0
MGVVFNPEALELFVMNK	frv2_121521	frv2_121521	yes	yes	0.018596	58.98	2225300	36479	0	0	0	0	0	0	0	0	0	60923	0	0	0	0	0	0	0	470960	0	0	0	0	0	0	0	0	139510	27186	0	0	0	0	0	0	0	0	0	37590	0	0	0
MLGFGIGYELYDLVENHPLQE	frv2_121521	frv2_121521	yes	yes	6.9474e-07	99.407	5183400	40338	37085	33275	75640	154950	25257	0	0	0	159280	106340	0	7006.5	0	0	0	0	0	220930	0	0	0	0	0	0	0	0	47855	0	0	0	0	0	0	0	0	0	0	0	0	0	0
AALDLLLPYQR	frv2_121612	frv2_121612	yes	yes	0.014016	72.2	2945000	64933	0	68840	158520	0	0	0	0	0	44175	42915	0	0	0	0	0	0	0	261860	93097	0	0	0	0	0	0	0	60880	30900	55581	0	0	0	0	0	0	72359	0	43285	0	0	0
FLPIYLAAGILQHDPFEVLDQK	frv2_121612	frv2_121612	yes	yes	0.016269	45.138	4735400	79317	127670	0	245880	0	17467	0	0	0	0	0	0	12248	0	0	0	0	23687	0	0	131920	0	0	0	0	0	0	241840	17496	0	0	0	0	35054	0	0	0	0	65195	0	0	0
LGISYPELTEMQAR	frv2_121612	frv2_121612	yes	yes	0.0049192	76.01	6073500	47778	178080	77934	164700	308300	0	0	0	0	78332	46233	30912	13020	0	28176	0	0	15254	329460	140240	61103	0	0	0	0	0	0	106840	0	64589	0	0	0	0	0	0	0	75510	0	200540	0	0
LLDPPLHEFLPEGDLEQIVSELTSQTGMK	frv2_121612	frv2_121612	yes	yes	3.9555e-06	70.295	1232800	0	0	0	0	0	0	0	0	0	0	0	0	0	0	0	0	0	0	295770	0	0	0	0	0	0	0	0	106670	0	0	0	0	0	0	0	0	0	0	0	0	0	0
LLDPPLHEFLPEGDLEQIVSELTSQTGMKEDEIFSR	frv2_121612	frv2_121612	yes	yes	3.5908e-06	64.592	7764600	67317	80969	70756	183090	753920	0	0	0	0	318460	235630	0	0	0	0	0	0	0	1395500	0	139810	0	0	0	0	0	0	262320	0	0	0	0	0	0	0	0	0	0	0	0	0	0
LSEVNPMLGFR	frv2_121612	frv2_121612	yes	yes	1.4257e-08	169.52	5481000	62177	104870	78724	269720	247240	23980	0	15754	34059	73019	26937	20349	15188	0	32709	0	0	20675	387710	115790	62074	0	0	0	0	0	0	102990	44222	66723	0	0	0	0	0	0	88994	0	35664	0	0	43715
MMIMAITQEQR	frv2_121612	frv2_121612	yes	yes	0.00052828	128.85	99749000	349860	1123000	2009200	3572500	3534500	208840	127890	0	67322	761540	646640	804980	288490	874480	326900	457390	0	524120	1575500	779500	1508400	0	69612	410760	220940	237950	729940	720060	90555	181400	879770	0	0	203380	264290	219510	976090	803530	878940	755000	0	1183600
VFSEMGSSVSYK	frv2_121612	frv2_121612	yes	yes	0.00026628	114.24	1165600	32154	27531	24995	0	0	0	0	0	0	0	18589	13931	0	0	0	0	0	0	0	0	0	0	0	0	0	0	0	41657	0	0	0	0	0	0	0	0	31805	0	17753	0	0	0
FIIQGFGNVGSWAAQLINEK	frv2_121634	frv2_121634	yes	yes	4.7372e-21	139.02	1449900	0	0	0	0	0	0	0	0	0	37519	55852	0	31809	32003	0	28102	0	30570	0	0	0	0	0	0	0	0	0	0	0	0	0	0	0	0	0	0	0	0	54943	0	0	0
TSVANLPYGGAK	frv2_121634	frv2_121634	yes	yes	0.0035707	84.169	522380	0	0	0	0	0	0	0	0	0	6825.9	0	4453.6	0	0	0	3469.7	0	0	0	0	0	0	0	0	0	0	0	0	0	0	0	0	0	38730	27579	0	16333	57433	35469	45064	43999	27493
YHPEVEQDEVNALAQLMTWK	frv2_121634	frv2_121634	yes	yes	4.2717e-09	111.73	4159400	0	0	0	0	0	0	0	0	0	49090	62639	45615	30886	66379	0	50798	0	37440	0	0	0	0	0	0	0	0	0	110750	53528	0	0	0	0	228460	0	63417	77151	342170	228580	263410	93302	165360
DNISAEFLDGFLQIIIPK	frv2_121672	frv2_121672	yes	yes	0.016661	58.635	889660	7095.5	15037	13885	37858	34851	0	0	0	0	0	0	0	0	0	0	0	0	0	66598	33019	0	0	0	0	0	0	0	17370	0	0	0	0	0	0	0	0	0	0	0	0	0	0
EIPYGPFEVLWPFPTGVNK	frv2_121672	frv2_121672	yes	yes	4.2431e-05	96.143	3925800	23802	34796	0	129380	159460	30471	0	0	42228	0	0	0	0	0	0	0	0	0	119290	0	0	0	0	0	41491	0	0	0	0	0	0	0	0	0	0	0	0	0	0	0	0	0
SFITTDMNPYFDSFVR	frv2_121810	frv2_121810	yes	yes	6.6173e-30	168.41	18587000	0	0	55045	150730	337910	86241	24612	18467	184100	0	63037	51442	38218	57286	53763	74030	0	101880	0	188440	138870	0	0	47744	235870	134730	0	0	47830	0	158160	203670	0	331750	0	282840	0	347680	150690	175270	232300	177020
SSGQAYQWEILR	frv2_121810	frv2_121810	yes	yes	0.0079859	74.987	7469400	0	0	0	0	0	44303	15043	27059	84675	0	0	21145	29984	0	24979	30049	0	44214	0	86172	59284	27853	0	0	104670	84048	49254	0	0	50516	43339	214570	0	197730	169990	84924	0	0	54426	130000	125290	99028
WLSYFPPLAIEDLK	frv2_121810	frv2_121810	yes	yes	1.1659e-09	129.17	11482000	16210	32319	61314	152950	276970	79059	0	0	99052	40100	0	24904	28156	35155	32975	41128	0	72695	0	128170	0	0	0	0	147650	0	0	74613	21745	0	101000	0	0	248140	0	178370	0	226540	109810	191690	142990	99774
IIGNMCDEVGASVGATKKCR	frv2_121839	frv2_121839	yes	yes	0.00039273	99.915	17916000	136610	111000	80829	171120	0	138950	10056	19468	328610	60547	0	0	0	47340	0	0	0	57380	559400	431050	180160	0	0	29187	0	0	0	225150	0	60154	0	0	0	0	0	0	220250	0	140960	226220	0	166600
AGNVQPYQFILPPTWK	frv2_121921	frv2_121921	yes	yes	1.3707e-46	189.33	23873000	167910	216620	259170	914540	675360	0	0	0	0	357530	214250	126850	98381	152450	63181	75610	5270.5	26382	724630	152440	0	31638	17688	0	0	0	0	386060	142610	0	0	74643	0	78371	0	0	427910	290420	0	0	0	0
GNTVVLFVASANDK	frv2_121921	frv2_121921	yes	yes	0.00038392	101.53	2871400	50985	34357	0	117930	0	0	17916	18371	0	0	32756	27633	37550	50753	0	0	0	0	0	0	0	0	0	0	0	0	0	149210	66327	30074	0	0	0	0	0	0	79753	0	42320	0	0	0
IQIVASPLIR	frv2_121921	frv2_121921	yes	yes	0.0013527	109.16	29490000	190970	322180	365410	1104400	961400	44411	16575	26367	35498	238040	115770	97906	72396	117820	53160	35731	0	23148	816960	249820	177560	52755	25542	31411	0	42152	0	398150	168960	208110	90534	179440	0	149940	0	0	494460	425050	139480	101620	104630	83061
LTNKPNATIEDIGSPEK	frv2_121921	frv2_121921	yes	yes	0.0035321	82.755	968550	17628	23035	13715	0	0	0	0	0	5185.9	0	0	0	0	0	0	0	0	0	85755	12259	0	0	0	0	0	0	0	28091	27061	27628	0	0	0	0	0	0	57840	29000	24749	0	0	0
VIASLGPFVTGNTFDPDELLEMSVEK	frv2_121921	frv2_121921	yes	yes	3.2975e-07	87.729	3521300	89863	0	0	0	0	34469	0	0	42880	0	0	0	0	40140	0	0	0	0	332970	0	0	0	0	0	0	0	0	197780	84201	0	0	0	0	0	0	0	192370	0	0	0	34381	0
VIASLGPFVTGNTFDPDELLEMSVEKVDDQTYYK	frv2_121921	frv2_121921	yes	yes	7.646e-05	59.094	10058000	128370	0	0	0	866000	0	0	0	0	410130	421710	60130	147730	0	80259	79133	0	54527	564430	0	0	0	0	0	0	0	0	0	0	0	0	0	0	0	0	0	0	0	190390	0	0	120670
YVLETPFALTGSHNLAK	frv2_121921	frv2_121921	yes	yes	2.4868e-82	206.13	42395000	320180	186190	385660	1069000	1442100	79299	22072	39843	105300	440400	108080	204880	186610	0	41844	40274	0	0	1813000	520110	139810	0	0	0	107100	0	0	771190	335260	194140	0	0	0	135130	0	72247	850570	308610	213380	0	0	0
EISPVVGFLATDSAEWVNGQIIR	frv2_122081	frv2_122081	yes	yes	1.6361e-159	223.44	30697000	43836	0	0	177830	0	221000	0	0	256110	0	85629	158190	242280	475990	267660	228330	0	245000	278240	103730	161150	64695	0	220140	666010	483780	63629	63707	47519	0	535880	212460	103790	1124800	510770	503260	0	491800	344750	510830	0	407790
IILLTSSQVAALKPGFGAYTASK	frv2_122081	frv2_122081	yes	yes	0.033948	42.639	6806000	0	0	0	349420	370970	0	0	0	0	140700	128610	148000	134930	125200	98469	76769	16469	0	0	183790	162840	0	0	0	0	0	0	223220	0	0	212310	233790	0	0	0	50685	0	0	0	0	0	0
TFNSPVHILVNSAGVLDAEYPTIANTSVESFDR	frv2_122081	frv2_122081	yes	yes	4.1266e-21	94.841	23399000	0	0	0	0	0	170280	0	0	142750	0	291210	87727	181570	353960	181330	201720	0	278930	0	180940	354870	0	0	0	435190	160720	0	0	0	145600	379260	0	0	820210	0	333070	0	566850	258110	382790	0	297090
AYAVGGSFR	frv2_122113	frv2_122113	yes	yes	0.0087127	85.676	5730300	56944	71477	67572	155040	146450	13560	0	16355	12526	53365	30436	19094	24787	40456	17735	10883	0	6517.3	206110	48891	35721	36244	0	21339	17955	0	0	102080	48501	72794	0	31838	0	0	41264	0	98550	79184	21249	20476	28807	19883
HDIHYWIGKDTSQDEAGVAAIK	frv2_122168	frv2_122168	yes	yes	1.8426e-05	89.604	2922200	0	0	0	0	0	0	0	0	0	0	0	0	23415	96687	21759	20146	0	36750	0	0	60956	0	0	0	0	0	0	0	0	0	77875	0	0	160800	0	0	0	0	60840	111660	78851	102200
DVPESSAMDYVAGYALALDMTAR	frv2_122214	frv2_122214	yes	yes	1.4704e-29	133.84	3540600	0	0	0	0	0	33030	0	0	42647	0	0	27515	52659	57295	27488	51177	0	41149	0	0	87202	0	0	37011	94181	48240	0	0	26044	0	91005	45424	106340	158730	122230	85747	0	0	0	0	0	0
GQDTFTPISPILPK	frv2_122214	frv2_122214	yes	yes	0.0018779	85.006	9052000	75613	0	80420	179570	382160	49447	0	0	75286	52417	61428	64857	0	64759	52965	45576	0	87425	0	126680	122820	34609	0	0	0	86089	0	134360	58370	116990	119140	188810	0	302090	199110	162220	0	0	0	0	0	0
SPVLFLKPTSSYLK	frv2_122214	frv2_122214	yes	yes	8.7351e-09	128.95	23681000	89647	152630	207890	640310	1276800	95305	16154	20373	143610	125370	90662	135480	149890	221820	123650	139000	35886	133050	429670	393270	179040	0	23610	32716	273180	39033	32642	241610	73443	34909	144560	457650	0	125520	416330	353370	150000	302040	90592	64978	132090	76882
DLTEQTAVFFQIYK	frv2_122262	frv2_122262	yes	yes	4.4915e-22	172.85	3111600	0	0	0	0	0	39852	0	0	144180	0	0	0	0	60069	38445	35126	0	86370	0	0	0	0	0	0	109320	0	78368	0	0	0	0	0	0	0	0	189050	0	0	0	75805	0	0
GWAGLQTIPR	frv2_122262	frv2_122262	yes	yes	0.0011012	143.4	4258600	0	0	0	0	0	30860	0	32437	89785	0	0	0	0	12319	10422	0	0	25181	0	0	0	44161	34407	105810	81527	158860	77382	0	0	0	38654	168380	0	155000	182410	162840	0	0	0	0	104650	0
LMQWPIEEVENLR	frv2_122262	frv2_122262	yes	yes	5.2504e-06	119.17	3017900	0	0	0	0	0	0	0	25748	201870	0	0	0	0	0	0	0	0	63534	0	0	0	0	0	0	138350	140630	140960	0	0	0	65337	0	0	0	0	265410	0	0	0	0	0	0
TTYGTFFDIDPNLK	frv2_122262	frv2_122262	yes	yes	4.6725e-17	160.48	9972800	0	0	0	0	0	0	19019	23904	200470	0	0	0	17018	0	29319	0	0	72311	0	0	47738	59704	27930	31280	119970	180580	112440	0	0	0	120460	151870	0	154690	232330	317080	0	0	0	0	0	0
LFGLFSGSDPFYAVIAYR	frv2_122276	frv2_122276	yes	yes	2.9609e-25	147.83	1312000	0	41150	30900	54159	0	0	0	0	0	30295	0	0	0	0	0	0	0	0	147100	0	0	0	0	0	0	0	0	0	0	0	0	0	0	0	0	0	0	0	0	0	0	0
VVGHGMNAQELAK	frv2_122276	frv2_122276	yes	yes	0.022537	62.528	26890	0	0	0	0	0	0	0	0	0	3305.4	0	0	0	0	0	0	0	0	13682	0	0	0	0	0	0	0	0	0	0	0	0	0	0	0	0	0	0	0	0	0	0	0
AFAHPPEELNSPASYK	frv2_122363	frv2_122363	yes	yes	0.00053905	90.853	1896100	0	0	0	22508	35384	0	0	0	13567	0	7824.5	9228.1	0	0	5964.3	12614	0	9866.4	0	0	21369	0	0	0	12034	0	0	0	9017.6	0	37526	0	0	126540	78249	50026	0	42256	43223	35490	40157	55821
LGLVEGNVLDNVER	frv2_122549	frv2_122549	yes	yes	2.9117e-17	162.94	5895200	0	0	0	0	0	0	0	0	0	12331	0	0	0	0	0	0	0	0	0	65342	62856	45650	29031	0	0	0	46166	0	30440	117130	175600	169190	0	269530	267730	229690	84713	0	186450	320980	214300	332180
MIVSVDTNNDGLVDFNEFKEMMR	frv2_122549	frv2_122549	yes	yes	0.0019443	60.134	180930000	0	0	79433	0	0	0	0	0	0	259310	532250	762900	2174500	8065600	1899500	0	0	2514800	339160	0	0	10702000	4501800	0	0	0	0	650450	0	0	0	0	0	0	0	0	0	226430	550550	12869000	0	2084300
TDVLLNAESIVLEFGGSVVR	frv2_122626	frv2_122626	yes	yes	7.7398e-38	152	6699000	27829	41260	44907	67968	139420	31586	0	0	38323	34460	0	0	25451	0	0	36909	0	33057	134850	0	111260	0	0	0	54235	0	22314	69183	0	0	48703	0	0	85368	78098	32370	0	162010	62569	0	0	0
EMAIVGGTGAFR	frv2_122785	frv2_122785	yes	yes	1.752e-05	122.18	1420700	0	0	0	0	0	0	0	0	0	0	0	0	0	0	0	0	0	0	0	0	0	0	27359	0	0	0	0	0	23598	135030	0	378160	0	0	0	0	0	0	0	0	0	159850
VENALPFGTVVAMDDPLTAGPER	frv2_122785	frv2_122785	yes	yes	1.4299e-63	164.06	20366000	0	0	0	0	0	0	0	0	0	0	136440	102900	142550	207050	164300	106190	0	201090	0	345370	640500	30437	71881	290190	584620	140470	112950	97836	111710	0	549470	641630	0	880880	478030	370440	211690	550920	383630	573080	635390	349770
YYQSLSPTMLGFQEEK	frv2_122785	frv2_122785	yes	yes	1.4562e-15	135.08	7723200	0	0	0	0	0	0	0	0	0	61033	86659	0	106740	0	0	85702	0	0	0	345780	255630	94477	63191	96684	320530	133630	69571	97615	0	131340	0	0	0	636460	409210	101480	0	0	0	0	418920	144560
AIWEELQSAVHAVDQMTTQTPAEAAGK	frv2_122822	frv2_122822	yes	yes	1.969e-16	103.71	53465000	365350	327790	272630	728820	2143700	301110	0	0	192950	987050	522700	438630	431210	1060400	469470	284700	0	250100	2348200	508430	608000	0	0	0	642100	0	0	757890	333070	244700	0	0	0	0	208520	0	215440	727290	476320	480020	0	0
ATHVNDAGSFDLPLIQSMQNK	frv2_122822	frv2_122822	yes	yes	5.2306e-24	135.81	31251000	168770	120100	166130	427610	744310	134740	77596	148300	112070	391060	261660	221300	231600	529930	40399	136100	3045.9	102200	1059200	497800	237170	112700	86372	203930	308660	163720	74757	330840	184390	147120	323320	410140	0	379180	229260	116060	265400	347790	186050	230270	121670	0
IKEQLNAESVLVK	frv2_122822	frv2_122822	yes	yes	4.6925e-07	122.1	10693000	100190	99209	37130	262860	307810	47448	26721	42733	27995	139950	40337	30684	71591	167130	29265	22339	0	0	390600	71923	48213	40584	0	0	0	72558	15749	104670	107430	64742	0	0	0	0	0	0	235860	79800	62949	72342	150750	106330
LEDLDFFIGSGLDVMAQR	frv2_122863	frv2_122863	yes	yes	7.2036e-17	135.08	3887600	34025	23729	0	0	142190	56085	0	0	64158	0	58671	0	0	0	0	0	0	0	166960	0	125810	0	0	0	102260	0	0	0	0	0	42420	0	0	110380	0	36020	0	0	0	0	0	0
VFSYSIIDGNVGFHSYVSTVK	frv2_122863	frv2_122863	yes	yes	0.014809	47.942	4020000	0	0	0	0	0	60949	0	0	75030	0	65748	29932	37205	77758	41722	70089	0	0	0	91601	0	0	0	31417	204210	0	0	0	0	0	0	0	0	0	0	89086	0	0	0	0	0	0
LYQTSVWMSAPALNIISFEK	frv2_122893	frv2_122893	yes	yes	0.00016819	87.062	11787000	0	0	0	0	192970	41780	0	0	254310	0	0	0	0	160770	72494	103500	0	184900	0	0	0	0	12502	0	370830	177070	88926	0	0	0	42431	0	0	255730	0	353440	0	58022	0	0	0	0
LTQAQLAQVINEKPQVIQEYESGK	frv2_122906	frv2_122906	yes	yes	0.0085397	49.076	20771000	98762	111010	0	0	398610	154150	0	0	69040	52222	88660	88852	135780	369680	105420	76478	0	99356	219740	353470	175280	61701	0	160130	265760	0	84439	0	0	0	181830	264350	0	305300	232560	121200	128540	226530	0	212170	178430	60801
SDYDNVIGALPYLK	frv2_123107	frv2_123107	yes	yes	1.6903e-14	154.13	52023000	1102500	910720	994250	1450900	1735500	175010	78126	128860	205010	1146900	551050	337000	416200	545170	312320	170260	0	0	3525100	0	0	0	0	219560	0	0	0	941830	0	172400	0	0	0	0	0	0	0	597160	325730	194000	0	0
ACDMISNLWGFEFLVLR	frv2_123111	frv2_123111	yes	yes	0.0054569	68.413	9623400	0	54522	0	0	693130	68057	0	0	106650	0	72566	0	0	0	0	0	0	54563	0	0	0	0	0	0	134180	65673	0	0	0	0	0	0	0	172860	73683	0	0	0	225770	0	0	151910
LVICSNIR	frv2_123111	frv2_123111	yes	yes	0.033894	74.255	1381800	0	0	0	0	0	0	0	0	0	0	0	0	0	0	0	0	0	0	0	0	0	0	0	0	0	0	0	0	39369	0	0	0	0	122410	92557	0	0	0	0	0	0	0
DSAISATPAEVLGHVFGLSPQEVNELK	frv2_123268	frv2_123268	yes	yes	0.0089631	43.293	390170	0	0	0	0	0	0	0	0	0	0	0	0	0	0	77798	0	0	0	0	0	0	0	0	0	0	0	0	0	0	0	0	0	0	0	0	0	0	0	0	0	0	0
LLVVPQNFAVAEQAGNEGLEYVVFK	frv2_123268	frv2_123268	yes	yes	1.5986e-15	103.24	521400	0	0	0	0	0	0	0	0	0	0	0	0	0	0	0	0	0	0	0	0	0	0	0	0	0	0	0	0	0	0	0	0	0	0	0	0	0	0	0	0	0	0
FAYTHQNESSLQPR	frv2_123280	frv2_123280	yes	yes	2.6209e-15	143.56	2510000	0	0	12655	0	32989	13960	0	12402	20541	0	0	0	4933.6	10526	15060	6628.9	0	11824	46001	40319	50669	39718	19010	29707	57444	48791	20571	0	0	7862.5	0	55973	0	70917	66395	31298	0	0	0	0	0	0
LEELSQTTTGGILLPR	frv2_123296	frv2_123296	yes	yes	1.9598e-136	249.54	61411000	180520	1410700	1304000	2609700	2501700	428890	185510	56281	59426	123540	760390	572930	639220	1343300	395790	241430	0	236270	3801000	143320	957450	738260	249010	461520	592610	414150	245560	1206600	729200	749610	497010	758760	0	622470	613190	343820	0	0	0	0	0	0
VLIRLEELSQTTTGGILLPR	frv2_123296	frv2_123296	yes	yes	0.083352	39.923	1232200	0	0	0	0	0	0	0	0	0	177380	134390	47484	55261	148470	0	85490	0	0	0	0	0	0	0	0	0	0	0	0	0	0	0	0	0	0	0	0	0	0	0	0	0	0
GVYDGTLFEVLK	frv2_123481	frv2_123481	yes	yes	0.00041796	106.26	1101700	0	0	0	0	0	0	0	0	0	0	0	0	0	0	0	0	0	0	0	0	0	0	0	0	0	0	30059	0	0	0	0	0	0	0	92346	92961	0	0	0	0	0	0
DMPVLQDGPPPGGFAPVR	frv2_123630	frv2_123630	yes	yes	0.0013618	75.91	3729100	0	43430	56351	0	127380	53250	0	0	0	0	60673	43134	0	0	84774	0	0	0	0	0	0	27081	28922	0	0	63227	0	0	0	50609	0	0	0	116100	0	0	0	0	0	0	0	0
IPNTGPSAIAIFLTTFGAFSWGMYQVGQGNK	frv2_123630	frv2_123630	yes	yes	0.06038	26.706	411740	0	0	0	0	0	0	0	0	0	0	0	0	0	0	0	0	0	0	367810	0	0	0	0	0	0	0	0	0	0	0	0	0	0	0	0	0	0	0	0	0	0	0
WVPPASGELRPDVW	frv2_123630	frv2_123630	yes	yes	0.0094662	86.911	21515000	0	0	0	482400	822420	191060	0	106460	221600	0	0	0	0	0	0	0	0	0	0	0	0	155110	0	0	183280	139950	0	0	0	33466	0	0	0	277210	0	0	0	390390	0	0	472420	0
NFNIIQYQQGVLK	frv2_123634	frv2_123634	yes	yes	2.1924e-154	267.07	19719000	0	0	0	0	0	0	15792	0	413320	0	0	0	50431	78096	76296	83460	0	352740	0	0	0	68931	50128	63645	423340	240610	271860	0	0	41664	180640	207970	0	614220	441850	972950	0	167700	0	199290	0	145860
TDLWYDWPK	frv2_123634	frv2_123634	yes	yes	0.00085843	117.31	3687700	0	0	0	0	0	0	0	0	65002	0	0	14869	18441	0	23998	29225	0	76366	0	0	56809	24077	0	0	93918	85039	73911	0	0	0	0	0	0	131340	91259	139280	0	0	0	0	0	0
VDFIWYYEDVVTR	frv2_123634	frv2_123634	yes	yes	2.8809e-08	131.66	4935700	0	0	0	0	0	0	0	0	165480	0	0	24823	0	0	30283	0	0	160190	0	0	0	0	0	0	79858	0	0	0	0	0	108470	0	0	186210	0	223540	0	0	0	153790	0	0
IQQFLQELEGEFMK	frv2_123675	frv2_123675	yes	yes	2.0204e-13	145.49	5206200	50065	80538	44863	103570	215290	0	0	0	32818	76326	0	27625	27540	0	20575	13749	0	22988	358500	0	0	0	0	0	0	0	0	86403	48470	0	0	0	0	0	0	0	73249	70442	0	0	0	0
YGPPALLLLGFEADENLK	frv2_123675	frv2_123675	yes	yes	0.017193	78.501	1678400	57227	0	0	0	0	0	0	0	21627	0	0	0	0	0	0	0	0	0	0	0	40967	0	0	0	0	0	0	0	0	0	0	0	0	34793	0	0	0	153920	0	0	0	0
GGMTSHAAVVAR	frv2_123736	frv2_123736	yes	yes	0.0062134	78.548	327960	4500.3	4914.3	2635	9791	16247	0	0	0	0	5430.9	0	0	0	0	0	0	0	0	24184	9283.1	6229	0	0	0	4285.7	0	0	9284.5	10842	0	0	6910.9	0	12037	8659.4	0	6353.7	7508.4	3822.2	0	0	0
IAVDMVNEGLVDIR	frv2_123736	frv2_123736	yes	yes	0.04082	55.782	1711600	0	0	0	0	0	0	0	0	0	0	0	0	0	0	30087	0	0	18772	0	163160	0	0	0	0	0	0	0	0	0	0	0	0	0	0	0	0	0	0	0	0	0	0
KLYGEFLINAQGEDVVAGIR	frv2_123736	frv2_123736	yes	yes	6.645e-05	90.872	2879700	75414	0	77141	0	0	0	0	0	0	115010	86688	32932	54600	0	24096	26350	0	0	260260	65415	0	0	0	0	0	0	0	0	0	0	0	0	0	0	0	0	0	0	0	0	0	0
MVEPQHLDQLLHPQFEDPSK	frv2_123736	frv2_123736	yes	yes	0.00096295	69.256	2897800	45530	43252	0	0	0	39868	0	0	48939	0	0	0	0	0	0	0	0	0	313990	83364	0	0	0	0	0	0	0	124250	0	0	0	0	0	0	0	0	0	0	0	0	0	0
QPLSPPALSDDMEIFMSWADEIR	frv2_123736	frv2_123736	yes	yes	0.031705	38.949	132100	0	0	0	0	0	0	0	0	0	29032	22981	0	0	0	0	0	0	0	0	0	0	0	0	0	0	0	0	0	0	0	0	0	0	0	0	0	0	0	0	0	0	0
TETSPEDVGGMHSAVGILTAR	frv2_123736	frv2_123736	yes	yes	0.0022166	61.52	17439000	204640	159220	171850	260650	388690	72635	42555	50517	51130	227600	143100	0	109030	163630	96128	78163	0	65867	751660	251740	145850	0	0	103770	0	0	0	214880	185300	124250	127850	0	0	305810	139500	0	177340	195090	108300	99313	0	93921
VVATGLPASPGAAVGQVVFNTDDAEEWHAQGK	frv2_123736	frv2_123736	yes	yes	4.3994e-07	70.112	9268600	269450	181450	0	0	0	0	0	0	0	449430	315020	0	0	0	0	0	0	0	1420700	0	0	0	0	0	0	0	0	515070	240380	0	0	0	0	0	0	0	306830	0	0	0	0	0
VVSEGEWISLNGSTGEVILGK	frv2_123736	frv2_123736	yes	yes	1.6555e-16	121.47	2168700	0	73480	56515	0	0	0	0	0	0	89941	61207	0	0	0	0	0	0	0	399340	126630	70713	0	0	0	0	34506	0	103060	77964	0	0	0	0	0	0	0	0	0	0	0	0	0
YEWWSEALHGVSYVGPGTR	frv2_123875	frv2_123875	yes	yes	8.8393e-09	115.38	5732000	0	0	0	0	272380	70371	0	0	0	0	0	0	0	0	0	46791	0	0	0	89868	81444	0	0	0	0	0	0	0	0	0	0	0	0	0	0	0	0	188420	134950	110590	0	64583
YTFNAVVTQQDLDDTYQPPFK	frv2_123875	frv2_123875	yes	yes	0.020245	50.924	2616900	0	0	0	0	0	0	0	0	0	0	0	0	0	0	0	0	0	0	0	0	0	0	0	0	0	0	0	0	0	0	0	0	0	110750	0	0	0	0	0	0	0	0
LVAEAAQSGFGPGPDGK	frv2_123985	frv2_123985	yes	yes	4.6021e-41	176.17	13373000	20511	16280	26272	79898	133080	49132	37769	54065	90441	0	19480	34401	62814	115480	47398	31315	0	45594	47665	54285	59931	231560	112070	131900	184650	206240	64534	43643	29935	75494	155100	397270	45252	367700	318570	115390	0	98945	68513	121920	126210	105170
VADAAGDLLDAIGDYAK	frv2_123985	frv2_123985	yes	yes	1.223e-129	233.48	27668000	54675	68906	74128	101880	289020	188230	72855	133320	226890	0	73035	65931	77864	205570	104790	87570	0	89600	0	134030	180370	243210	104260	266370	441300	326530	133300	0	50697	0	321520	575440	272540	563360	261480	251110	83351	271710	133820	254240	353010	260020
IQDVHTFADYSKPLLEFLASLDPNEK	frv2_124041	frv2_124041	yes	yes	0.00079352	56.972	546560	0	0	0	0	0	0	0	0	0	0	0	0	0	0	0	24996	0	0	0	0	69325	0	0	0	0	0	0	0	0	0	0	0	0	0	0	0	0	0	86994	0	0	0
MVLHPGFK	frv2_124041	frv2_124041	yes	yes	0.051336	66.993	150410	0	0	0	0	0	0	0	0	0	0	0	0	0	0	2723.7	0	0	0	0	0	5499.5	0	0	0	0	0	0	0	0	0	0	0	0	0	0	0	0	13638	0	10793	13759	6952.5
AFDEVNSQLQTK	frv2_124150	frv2_124150	yes	yes	1.2796e-108	215.02	6303700	0	0	0	0	202810	0	0	56661	0	59626	0	0	0	138240	0	0	0	48510	0	0	0	0	70316	0	0	0	0	104040	0	0	0	0	0	366310	0	135330	70622	0	0	0	0	0
LLVSDEARR	frv2_124150	frv2_124150	yes	yes	0.059269	80.438	134620	0	0	0	0	0	0	0	0	0	0	0	6193	0	20059	0	9510.1	0	0	0	0	0	0	0	0	0	0	0	0	0	0	0	0	0	0	0	0	0	0	0	0	0	0
RAFDEVNSQLQTK	frv2_124150	frv2_124150	yes	yes	1.4215e-07	130.19	3029300	10223	15690	11084	0	65206	13989	9952.5	0	15875	9265.5	10314	12847	20033	57330	19356	0	0	0	29619	20822	0	15391	10678	27506	40049	23914	11749	11975	19397	31998	55317	84936	0	92140	104660	0	21420	43232	18395	37709	53963	44614
EIVNNIPDNEIYATLK	frv2_124159	frv2_124159	yes	yes	0.0028628	74.783	8398600	30533	0	0	76985	0	72393	35791	49909	78909	27841	35160	49917	65890	127760	74440	62760	0	71995	57566	0	0	112820	57959	78688	164420	163150	0	0	0	0	0	251710	0	0	0	0	0	0	115650	0	124350	94445
GGGGASSTQFSNSDYGLPQGKPVFK	frv2_124159	frv2_124159	yes	yes	1.7854e-05	76.78	8829900	0	0	0	0	144050	0	20323	19326	49773	32517	40582	0	69420	161140	60227	38481	0	47602	0	100720	74188	58123	30292	64397	153080	94938	24797	0	0	78346	94046	203620	0	339930	303210	74258	110040	176630	0	111840	218290	86948
GGGGASSTQFSNSDYGLPQGKPVFKK	frv2_124159	frv2_124159	yes	yes	3.411e-07	90.758	544510	0	0	0	0	0	0	0	0	0	0	0	0	22120	0	0	23306	0	17704	0	0	0	0	0	0	0	0	0	0	0	0	0	0	0	0	0	0	0	0	0	0	0	0
LLSQDPFHEVK	frv2_124159	frv2_124159	yes	yes	0.045985	64.224	0	0	0	0	0	0	0	0	0	0	0	0	0	0	0	0	0	0	0	0	0	0	0	0	0	0	0	0	0	0	0	0	0	0	0	0	0	0	0	0	0	0	0
WVDWEDQILEDTVPLVR	frv2_124443	frv2_124443	yes	yes	2.2423e-07	118.72	2046900	66490	0	0	0	0	0	0	0	0	0	0	0	0	0	0	0	0	0	249300	0	0	0	0	0	0	0	0	77180	41659	0	0	0	0	0	0	0	0	88243	0	0	0	0
WKPSGLEEVDPSEVEAVFTPLGAETR	frv2_12448	frv2_12448	yes	yes	5.5561e-06	79.94	16296000	40552	0	72898	0	0	124210	21285	0	137440	0	155050	83505	146560	203810	143590	128180	0	146330	0	306330	119930	0	0	0	274940	250850	0	0	51884	0	186630	0	0	389790	158210	0	88969	0	209590	289230	213560	179480
RNVMVKMMILMSFQLR	frv2_124511	frv2_124511	yes	yes	0.0044178	94.023	3631600	340860	0	0	0	0	126810	0	0	228460	0	0	0	0	0	0	0	0	0	0	0	369770	0	0	0	0	0	0	0	0	0	0	0	0	0	0	0	78215	0	116760	387280	0	0
GIQYEFLPEKLPNK	frv2_124697	frv2_124697	yes	yes	0.037505	73.415	4344500	0	0	0	0	0	30394	0	0	36498	0	0	0	0	49518	15802	0	0	0	0	0	45124	0	0	0	0	57351	0	0	0	0	0	0	0	168540	126510	96555	0	0	0	77145	108860	0
GIQYEFLPEKLPNKSELLLK	frv2_124697	frv2_124697	yes	yes	0.043917	59.252	11846000	19693	0	0	157440	653670	48197	0	0	96414	0	143970	0	137830	139010	85467	0	0	0	214100	134820	87836	0	0	0	227200	105360	0	64024	0	0	0	0	0	0	0	170470	70307	267560	209960	257200	60395	207590
VQLALNLK	frv2_124697	frv2_124697	yes	yes	0.02024	84.568	2838100	16779	18643	25170	48503	111090	13594	0	0	20849	16562	24420	21889	18788	13408	17299	21533	0	19643	0	37813	29112	11761	0	0	48253	20587	0	0	0	0	51284	39915	0	0	0	45947	0	0	0	0	46123	58296
WNQEFLNHQIVK	frv2_124697	frv2_124697	yes	yes	1.0646e-06	155.88	7273300	0	0	0	77666	241030	0	0	0	48289	0	0	12822	0	0	20443	26212	0	44406	0	146760	120100	18268	0	0	82574	0	0	86674	0	47949	0	126510	0	129990	91132	122170	26730	117500	0	124590	0	0
LYESQGGPIILSQIENEYGPMEYEIGAPGK	frv2_124736	frv2_124736	yes	yes	0.0081291	38.428	8829100	0	0	0	0	0	208910	0	0	68127	0	0	0	0	0	113940	148660	0	0	0	0	168310	0	0	0	0	0	0	0	0	0	0	103520	0	0	0	0	0	0	0	265930	0	218680
LENSGTSLSNIIEQDVKDNPVMLYMK	frv2_124820	frv2_124820	yes	yes	2.3277e-07	84.689	6520200	0	0	0	0	0	0	0	0	0	0	199350	42014	39842	104760	64096	0	0	0	188370	0	0	0	0	0	256030	0	0	0	0	0	228870	0	0	376600	0	0	0	237090	0	0	0	0
AVVKVVDMDDYAIDDDQYEEK	frv2_124922	frv2_124922	yes	yes	0.083188	37.85	2274800000	27740000	20595000	19255000	46554000	66829000	6248800	2465500	2324700	6467200	16394000	10743000	6227400	5060100	8222900	3310200	2410700	11198	1799000	54833000	25686000	9700900	2130900	995790	2507200	4639500	2176000	807020	32337000	20737000	20194000	5885700	6112300	0	8133200	7540000	3681600	53890000	37883000	14535000	7949400	13188000	4654400
VTVFYGTQTGTAEGFAK	frv2_124922	frv2_124922	yes	yes	9.7078e-30	155.1	2643700	0	0	0	0	0	41273	21235	51470	0	0	0	0	23987	46020	23843	21446	0	47096	0	0	0	0	0	51447	82151	137210	50220	0	0	0	0	0	0	0	130910	0	0	0	0	0	0	0
SALNWAHANVDKDWNEWTGGNML	frv2_124975	frv2_124975	yes	yes	0.00015407	74.657	5738300	112970	142290	0	0	0	0	0	0	0	340100	142330	76333	124080	175870	85589	64115	0	0	987280	0	134170	0	0	0	114380	0	0	273580	70205	0	0	0	0	133220	0	0	0	0	0	0	0	0
TFLHSEYGGPGTLLVDPFIDMADMVTER	frv2_124975	frv2_124975	yes	yes	3.7815e-37	123.74	18865000	0	257300	210450	0	1198500	62344	0	0	0	583440	0	31816	84137	0	37490	0	0	0	0	0	279970	0	0	0	0	0	0	603190	48841	0	0	0	0	154250	0	0	41653	465650	184560	0	0	0
ETLEALMSQPGMTEKLEALVSK	frv2_124999	frv2_124999	yes	yes	0.00011498	80.859	11198000	83215	78404	0	218410	445890	0	0	0	86111	53575	0	0	71417	176780	75966	82379	0	58867	0	0	0	0	0	0	326440	77453	0	0	51662	0	301890	0	0	352880	143530	151210	0	274610	219090	241020	0	195040
EVLIGLYSK	frv2_124999	frv2_124999	yes	yes	0.028689	68.846	1439000	0	0	12423	0	58454	19152	12728	14908	13155	0	0	10704	0	0	15565	0	0	0	0	0	0	60316	13188	0	41806	24965	0	0	0	0	0	0	0	63224	83812	19688	0	0	0	0	0	0
NIMLNSNIELYGPYGR	frv2_125090	frv2_125090	yes	yes	2.2653e-46	185.74	16272000	205400	258410	170320	237900	421820	0	0	0	66045	290400	171930	83489	95694	107010	51562	0	0	0	733280	264060	118560	0	0	0	0	0	0	319980	92542	0	0	0	0	0	0	0	0	0	0	0	0	0
NSEITESNKEPPSVGFAFVSSVLLPDGTPDVHFR	frv2_125090	frv2_125090	yes	yes	7.3885e-08	73.761	9818700	0	116180	0	0	559540	0	0	0	0	423560	401320	0	128640	323960	68736	71452	0	0	484010	0	0	0	0	0	0	0	0	199390	127870	0	0	0	0	0	0	0	130590	0	0	0	0	0
GQTKMTPLIK	frv2_125355	frv2_125355	yes	yes	0.077669	83.499	9496200	0	0	0	0	0	0	0	0	0	0	0	0	0	0	0	0	0	0	0	0	0	0	0	0	0	0	0	0	0	0	0	0	0	0	0	0	0	0	0	0	0	0
VWAAAVPGGGKPLNTGESWTITAAAGTQK	frv2_125355	frv2_125355	yes	yes	1.6255e-57	143	56016000	0	0	0	157900	713050	456790	76316	48049	232780	69087	245710	238250	797850	3022000	1248800	728000	29745	385310	0	600580	1387900	453790	151160	1520500	2128300	837050	333220	164700	129390	79858	1673200	3018000	367260	2473100	1961700	432950	0	0	0	0	0	0
VYDVTTFLDDHPGGDEALLSATGK	frv2_125364	frv2_125364	yes	yes	1.3623e-09	101.17	9901700	0	0	0	0	0	113080	43361	66755	75523	0	0	0	0	0	0	0	0	115700	0	0	0	0	0	112570	158210	121100	0	0	0	0	0	0	0	0	0	0	0	0	0	197340	259700	0
KVTEIPGHVKPMFSLGYLK	frv2_125438	frv2_125438	yes	yes	0.0031563	82.01	2339500	0	0	0	66600	315340	0	0	0	0	32079	0	0	0	0	0	0	0	0	134210	0	0	0	0	0	0	0	0	38471	0	0	0	0	0	0	0	0	0	0	0	0	0	0
YIETDSIQPLLHVLYGGMIFSYLVALPNER	frv2_125438	frv2_125438	yes	yes	0.00017386	57.902	7096100	40939	100140	0	0	873460	20551	0	0	0	117920	224070	0	0	0	0	23272	0	0	0	0	95868	0	0	0	0	0	0	93542	0	0	0	0	0	0	0	0	0	0	27601	0	0	0
FIKDFFLK	frv2_12552	frv2_12552	yes	yes	0.0053801	119.21	154090	0	0	0	0	0	0	0	0	0	0	0	0	0	0	0	0	0	21159	0	0	0	0	0	0	0	0	0	0	0	0	0	0	0	0	0	0	0	0	0	0	0	0
GVLVSPVLQSGATTVDAYFPK	frv2_125534	frv2_125534	yes	yes	2.0978e-32	144.4	11963000	0	0	0	137040	343660	66611	13735	10726	61883	0	0	29947	54770	65813	55701	72562	0	56778	0	131090	136720	0	0	0	109130	41583	0	0	0	0	158290	196090	0	201260	103070	96008	0	170800	147660	200190	136260	105020
EAGLFDPIASSIQVTEFTIK	frv2_125550	frv2_125550	yes	yes	4.1249e-13	120.71	3583600	0	0	0	0	0	35680	0	0	100330	0	0	0	30359	49024	16293	26840	0	90338	0	0	0	0	0	0	112020	0	0	0	0	0	0	0	0	221680	0	142150	0	0	56953	61759	0	76777
GSSFDELLTIPEQDDWTYSDGK	frv2_125550	frv2_125550	yes	yes	0.048397	42.348	536890	0	0	0	0	0	0	0	0	43470	0	0	0	0	0	0	0	0	44300	0	0	0	0	0	0	0	0	0	0	0	0	0	0	0	0	0	65288	0	0	0	0	0	0
ETLSSLVNANEATNWINK	frv2_125650	frv2_125650	yes	yes	4.2377e-276	289.5	86762000	126890	155560	84622	406460	1224900	548710	25431	23756	151760	0	93416	259920	451310	479420	791020	548690	5519.3	311910	0	1020600	1976000	226270	116230	337240	807350	106450	0	57768	124010	233970	1652200	767700	163000	2244800	1076200	289170	134940	1781500	1746400	1768400	850100	733460
FVKPYSQDVK	frv2_125650	frv2_125650	yes	yes	0.0020428	103.26	7634000	13663	15348	15669	70818	139000	19013	0	0	6943.6	0	20323	0	67549	84854	120280	32187	0	46480	0	49262	93418	59860	8730.3	29417	101080	13524	0	0	8037.2	127910	131240	161910	0	380900	144140	0	16372	150580	55079	106290	77665	0
GSNIELILDVAK	frv2_125650	frv2_125650	yes	yes	1.9163e-06	154.23	5770400	0	0	0	0	0	42996	0	0	0	0	0	0	35915	95420	70810	51324	0	0	0	0	210070	0	0	0	110370	0	0	0	0	0	237970	0	0	298060	111150	0	0	0	190370	117840	0	0
GSNIELILDVAKETLSSLVNANEATNWINK	frv2_125650	frv2_125650	yes	yes	7.2573e-05	58.319	938060	0	0	0	0	421630	0	0	0	0	0	0	0	0	0	0	9507.6	0	0	0	0	0	0	0	0	0	0	0	0	0	0	0	0	0	0	0	0	0	0	0	0	0	0
IKYITVGNEIYPNDNEAQYILPALQNIQNAISSANLQGQIK	frv2_125650	frv2_125650	yes	yes	0.082109	17.617	484040	0	0	0	0	0	0	0	0	0	0	0	0	0	0	0	54711	0	0	0	0	0	0	0	0	0	0	0	0	0	0	0	0	0	0	0	0	0	0	0	0	0	0
LYYPDEEALQALR	frv2_125650	frv2_125650	yes	yes	6.9863e-40	199.8	93553000	196790	285250	290140	851840	797070	629990	94874	157890	290540	0	66849	157750	655230	1141000	1072500	775080	7620.6	169260	109260	473690	1902400	889330	362440	867330	415170	465490	78379	73724	179480	578240	2269700	2733000	316690	3116100	2141700	473230	213080	1818600	2123300	2466100	2020200	566710
QNIHLDYALFNQQGNNDVGYQNLFDAQLDSVYAALEK	frv2_125650	frv2_125650	yes	yes	1.691e-13	82.948	14048000	0	0	0	0	0	0	0	0	0	0	77518	0	0	0	0	0	0	0	0	0	604020	37385	0	0	0	0	0	0	0	0	0	0	0	170730	0	0	0	697690	0	0	0	0
SYIQPIINFLVTNGSPFLANVYPYIAYVGDK	frv2_125650	frv2_125650	yes	yes	0.00048405	49.152	304940	0	0	0	37379	0	0	0	0	0	0	0	0	0	0	0	0	0	0	0	0	0	0	0	0	0	0	0	0	0	0	0	0	0	0	0	0	0	0	0	0	0	0
VSIAIAMSLIQNSYPPNNGAFIDPAR	frv2_125650	frv2_125650	yes	yes	0.0010616	54.306	2934400	0	0	0	0	0	0	0	0	0	0	0	0	0	0	0	0	0	0	0	0	291430	0	0	0	0	0	0	0	0	0	0	0	0	0	0	0	0	0	119560	0	0	0
YITVGNEIYPNDNEAQYILPALQNIQNAISSANLQGQIK	frv2_125650	frv2_125650	yes	yes	4.5714e-07	64.7	38009000	52658	121510	107880	148200	2270600	26273	0	0	0	0	87864	0	56075	0	0	311490	0	49216	0	579030	639630	0	0	0	325720	0	0	94384	0	316520	199490	0	0	1113000	484590	40632	0	1229200	421970	0	0	0
SDNLSDSFSYVELYR	frv2_125781	frv2_125781	yes	yes	0.00039222	97.823	7477000	0	0	0	0	0	44866	19084	21815	75967	0	48146	42535	39072	55480	53257	63053	0	74160	0	78259	75312	0	0	0	89865	57197	0	0	0	0	136180	135940	0	280810	152830	189230	0	113350	0	159340	119730	0
EYFEIPWASLR	frv2_125855	frv2_125855	yes	yes	1.9181e-08	167.18	10976000	0	0	0	0	0	35632	0	0	0	0	34739	51834	62971	102530	95600	120820	0	172180	0	0	0	0	0	0	150530	0	52235	0	22235	0	222280	186690	0	418880	102160	314870	77998	519510	395060	518380	328880	299900
ISYDYLVIATGHTEPIPK	frv2_125855	frv2_125855	yes	yes	7.7374e-05	98.227	1257000	0	0	0	0	0	0	0	0	0	0	0	0	0	0	0	0	0	46412	0	0	0	0	0	0	0	0	0	0	0	0	0	0	0	0	0	0	0	0	0	112820	176190	110260
KISYDYLVIATGHTEPIPK	frv2_125855	frv2_125855	yes	yes	8.1225e-13	124.45	8475000	0	0	0	0	0	0	0	0	0	0	0	33486	46998	98054	70499	108870	0	118770	0	0	64079	0	0	34211	61750	75238	0	0	0	0	147990	195920	0	424790	180890	199000	0	206710	212210	375650	377750	335340
EFQETLEALMSQPGKTEKLEALVSK	frv2_125861	frv2_125861	yes	yes	0.00079362	70.174	7636800	0	0	0	0	560890	0	0	0	0	0	120540	0	0	415770	147390	134720	0	0	0	0	0	0	0	0	303430	0	0	0	0	0	204390	0	0	0	0	0	0	0	0	0	0	0
AMGGGIGNTGQQYVR	frv2_125937	frv2_125937	yes	yes	5.8432e-05	108.23	220280	0	0	0	0	0	0	0	0	0	0	0	0	0	0	0	0	0	0	0	0	0	0	0	0	0	0	0	0	0	0	0	0	0	0	0	0	0	0	0	0	0	0
LSIGIIDVDLR	frv2_126001	frv2_126001	yes	yes	6.1531e-06	152.54	430120	0	0	0	0	0	0	0	0	0	0	0	0	0	0	0	0	0	0	0	0	0	0	0	0	0	0	0	0	0	0	0	0	0	0	0	0	0	0	0	0	0	0
ALAETLNERIESTVGEFLSNVGR	frv2_126055	frv2_126055	yes	yes	3.0389e-06	91.337	2709800	0	25380	95173	0	236880	0	0	0	0	188770	0	59267	104640	96086	0	46629	0	0	0	0	0	0	0	0	0	0	0	0	0	0	0	0	0	0	0	0	0	0	0	0	0	0
IESTVGEFLSNVGR	frv2_126055	frv2_126055	yes	yes	0.0017514	85.976	2459600	0	0	0	0	0	0	0	82037	0	0	0	0	0	0	0	0	0	0	0	0	0	0	45687	0	0	0	0	0	0	0	0	0	0	0	0	0	0	0	0	0	54772	0
NVLDAFFLGK	frv2_126055	frv2_126055	yes	yes	0.00090656	124.67	3108800	80237	66379	90580	299550	0	0	0	13618	0	81719	0	39931	0	0	0	0	0	0	0	74389	0	0	0	0	0	0	0	112480	65495	0	0	0	0	0	0	0	102280	73664	0	0	0	0
GEMESFNNLLSEMLSSLK	frv2_126076	frv2_126076	yes	yes	0.00039532	95.662	12175000	0	0	0	0	0	0	0	0	0	0	0	0	0	36228	0	0	0	0	0	0	0	1279400	768680	619490	0	0	0	0	0	0	0	6249500	0	628660	546680	0	0	0	0	0	0	0
IGLVYQFQIAPK	frv2_126192	frv2_126192	yes	yes	0.030097	60.691	3273700	0	0	0	0	0	39204	0	16278	45950	24847	15406	20779	32122	0	0	0	9802.3	19256	0	0	62251	33546	0	0	0	0	35617	0	0	0	0	0	0	0	0	0	0	0	0	101530	0	74369
KIGIDEVVYTVDLK	frv2_126192	frv2_126192	yes	yes	1.3613e-08	128.73	7083000	19769	0	0	0	212670	57471	0	0	55072	30668	45153	0	64079	111050	0	68416	0	68608	137300	0	0	0	0	0	176780	81244	28970	0	0	0	0	0	0	0	0	0	0	0	136420	137920	102230	0
SINNSNVIAFSGK	frv2_126303	frv2_126303	yes	yes	5.2504e-06	119.17	2878700	0	0	0	0	0	0	12159	14407	36047	0	0	0	0	0	0	38312	0	22444	0	0	0	67772	20001	26334	85557	57551	18906	0	0	33916	46624	105010	0	112540	97151	53705	0	0	38078	0	0	31315
YTSTETAIEIANTWLNTPFK	frv2_126303	frv2_126303	yes	yes	1.082e-28	147.84	11138000	0	69395	0	153610	418400	104930	0	0	82622	0	0	73333	108430	221590	101500	123090	0	92650	0	0	187140	0	0	60619	231720	124010	0	64476	22710	0	217230	0	0	386730	0	218460	0	75582	0	49980	0	54469
AFTPTQVFAMMLSNMK	frv2_126390	frv2_126390	yes	yes	1.4427e-19	140.8	12013000	0	49801	54359	181080	331320	43070	0	0	58009	43879	58424	51987	40843	56123	66319	75768	0	54031	177500	86776	108930	0	0	0	122000	18930	0	59368	0	0	108790	0	0	155400	0	122740	0	171910	0	105390	14215	0
AVLDAATIAGLNPLR	frv2_126390	frv2_126390	yes	yes	2.374e-22	167.03	17396000	60835	68371	78941	228840	432520	117020	0	0	103780	0	56800	45712	57685	0	41854	68016	4817.4	69177	213740	213520	183550	0	0	0	161090	0	0	85972	32015	19848	166950	224620	0	0	201980	168320	55342	294240	197520	207610	202540	161760
FIGIAGAASTMMNPK	frv2_126390	frv2_126390	yes	yes	7.3423e-16	156.6	20025000	0	0	0	613190	0	104260	53884	78906	145930	65281	18799	17126	20209	44044	215460	119750	13955	123520	0	0	377150	161490	105120	199380	399750	485900	112190	0	0	99509	292310	448590	0	511580	407440	227860	0	43297	28629	17259	463830	193250
LLHETTATALAYGIYK	frv2_126390	frv2_126390	yes	yes	3.2361e-16	138.28	8634200	0	0	0	152330	0	0	0	0	44765	0	0	22467	0	23286	22892	30574	0	44722	244130	302470	181950	0	0	0	57239	0	0	101950	0	26799	97318	0	0	231200	49032	159370	0	163060	131350	236490	0	0
SLPYTVTEGPDGYPLIQAR	frv2_126390	frv2_126390	yes	yes	0.00058075	82.449	5536100	0	0	0	0	459690	0	29054	24111	91990	0	0	75686	75319	112700	72274	63794	0	71390	0	0	0	0	0	0	0	0	0	0	0	0	0	0	0	0	0	0	0	0	160100	0	0	149950
AAGATWIQFDEPTLVK	frv2_126398	frv2_126398	yes	yes	5.9495e-20	145.46	13368000	0	0	103670	0	0	72124	30342	36352	88222	0	124670	59335	58949	61965	72043	69445	0	86628	0	323190	160330	0	0	0	102660	43308	40685	0	70337	0	254090	199820	0	327810	261210	112320	0	287140	124680	143370	0	128300
WFDTNYHFIVPELGPDVK	frv2_126398	frv2_126398	yes	yes	0.0017433	70.783	4546900	0	0	0	0	0	0	0	0	0	0	0	0	0	0	0	0	0	0	0	0	0	0	0	0	0	0	0	0	0	0	0	0	0	0	0	0	0	0	0	139810	0	0
DNEGPAGMPGNMLNLFEAVK	frv2_126629	frv2_126629	yes	yes	0.002623	66.777	9476400	98089	87618	0	171740	513790	42280	8906.2	13235	50183	0	0	0	37608	0	0	0	0	24243	463340	156600	151890	0	0	0	0	0	0	183100	72877	0	0	0	0	0	0	0	157430	0	0	0	0	0
DNEGPAGMPGNMLNLFEAVKK	frv2_126629	frv2_126629	yes	yes	0.016652	51.971	5928500	71475	49267	61245	143590	347770	0	0	0	0	131130	52539	27413	27161	48550	30212	36822	0	0	398830	114500	0	0	0	0	0	0	0	172940	39084	0	0	0	0	0	0	0	127600	0	79903	0	0	0
MSDIAQSLGMPPGFGDAMK	frv2_126629	frv2_126629	yes	yes	3.7174e-44	161.31	25509000	210740	200670	176950	478770	729820	52957	35421	44670	63988	262200	82807	80138	72393	135430	80130	41799	0	35650	988830	237250	123400	101170	34259	57755	105040	74196	0	305190	150920	0	95310	112810	0	0	0	0	281920	246020	171670	0	110340	102480
TQITEAAMELGSEK	frv2_126629	frv2_126629	yes	yes	0.034163	64.588	1159300	0	0	0	0	0	0	0	0	0	30075	0	7096.5	11310	0	0	0	0	0	0	0	0	0	0	0	0	0	0	0	0	27034	0	0	0	0	0	0	31409	0	0	0	0	0
VSLLVTEAYK	frv2_126629	frv2_126629	yes	yes	2.5554e-05	164.33	4916000	56411	54739	52626	156620	142310	0	0	13374	0	29394	19217	0	11314	0	0	0	0	0	213800	76981	44219	50325	0	0	0	0	0	112230	27235	0	0	54317	0	0	0	0	98560	72748	27982	27101	0	0
VSLLVTEAYKDAHQK	frv2_126629	frv2_126629	yes	yes	1.0799e-13	147.51	13483000	101080	114410	120820	304740	447250	30250	10371	10701	11398	236690	116170	98940	110350	252850	77999	45236	0	37233	116540	61474	68605	25602	0	24149	83728	27737	0	197820	114590	162830	135200	66387	0	79615	50306	0	221860	0	155130	93774	23274	38539
IPGISPGIIFTDITR	frv2_126816	frv2_126816	yes	yes	7.4163e-14	142.19	21876000	0	0	0	0	0	0	0	0	0	0	0	0	0	0	0	0	0	82185	0	0	0	0	0	0	0	0	0	0	0	0	0	0	0	130320	57438	552970	0	922670	822060	1753000	494510	1144400
RLVLTDNKPFEVVFVDATESSI	frv2_126816	frv2_126816	yes	yes	0.02713	55.907	3239400	0	0	0	0	0	0	0	0	0	0	0	0	0	0	0	0	0	79290	0	0	0	0	0	0	0	0	0	0	0	0	0	0	0	0	0	0	0	159010	139460	297880	0	210220
SWIGIGGVEEHGDDILDGLFSIQK	frv2_126816	frv2_126816	yes	yes	5.126e-64	162.42	6183200	0	0	0	0	0	0	0	0	0	0	0	0	0	0	0	32788	0	79025	0	0	0	0	0	0	0	0	0	0	0	0	0	0	0	126270	0	75739	0	578020	255510	0	0	0
WVVISDGFPR	frv2_126816	frv2_126816	yes	yes	0.0022775	103.26	7691300	0	0	0	0	0	0	0	0	0	0	0	0	0	0	0	0	0	33075	0	0	0	0	0	0	0	0	0	0	0	0	0	0	0	51715	0	131850	78783	258890	237200	527740	513310	459420
ENLSGEGEEFIYHSK	frv2_126839	frv2_126839	yes	yes	0.063408	51.004	12809000	257210	169300	132860	176800	313260	0	0	12784	0	61353	0	0	0	0	0	0	0	0	498550	178940	0	0	0	0	0	0	0	350650	116420	76088	0	0	0	0	0	0	315840	317890	143360	90686	0	55694
GLGGFFK	frv2_126839;frv2_67433	frv2_126839	yes	yes	0.021724	87.582	6299500	0	0	0	0	0	0	0	0	0	0	0	83602	0	0	0	0	0	0	0	201360	0	0	0	415390	0	0	166360	0	0	0	0	0	226210	0	0	0	79117	0	0	0	0	0
NLNPEWNEDLTLSISDPK	frv2_126881	frv2_126881	yes	yes	7.3256e-34	160.76	5694300	0	0	0	0	0	45906	0	0	233160	0	0	0	24718	0	37311	34693	0	126820	0	0	80905	0	0	0	155670	231880	138710	0	0	0	120080	0	0	281410	0	263370	0	0	0	0	0	0
EQNIDSAVLQWDDSDFQF	frv2_126966	frv2_126966	yes	yes	0.024549	55.031	1524700	37850	53943	67990	76161	0	0	0	0	0	22269	45662	0	21488	0	0	0	0	0	131450	0	0	0	0	0	33306	0	0	0	30879	0	0	0	0	0	0	0	0	0	0	0	0	0
LTISSLNLLK	frv2_126966	frv2_126966	yes	yes	0.0020928	104.43	3057100	44157	74844	34859	158880	202720	0	0	8358.4	0	0	31916	0	0	0	0	0	0	0	176380	0	0	0	0	0	0	0	0	0	22604	0	0	0	0	0	0	0	0	0	0	0	0	0
VISEQEGCPIEELNAGK	frv2_126966	frv2_126966	yes	yes	0.041271	52.372	13771000	0	0	0	0	0	61736	463790	597750	31776	0	30932	14577	0	62066	0	0	25202	0	0	0	0	48036	111300	55086	0	49746	53233	0	0	0	0	833560	0	0	152080	0	126770	0	91252	189230	1719500	297200
TVNNSGTFHGNGNGGYTEGNFDASTTNFNK	frv2_12740	frv2_12740	yes	yes	4.9369e-05	57.339	642830	0	0	0	0	0	0	0	0	0	0	0	23490	27546	0	0	0	0	0	0	0	0	0	0	0	0	0	0	0	0	0	0	61358	0	0	0	0	0	0	0	0	0	0
AAIAGGLISSPVIGWSLYTLK	frv2_127830	frv2_127830	yes	yes	5.1491e-12	117.37	4058600	44252	73160	94248	185300	206120	0	0	0	0	0	0	0	0	0	0	0	0	0	0	0	0	0	0	0	0	0	0	0	0	0	0	0	0	0	0	0	0	0	0	0	0	0
ISEDINPPNSYMDLIFK	frv2_127846	frv2_127846	yes	yes	2.2778e-16	134.82	6582000	0	0	0	0	0	141720	19414	18668	74009	0	0	0	29061	69333	0	0	0	36124	0	0	0	0	0	0	136850	52822	0	0	0	0	0	120310	0	0	0	0	0	0	78241	0	149770	107040
HADFIQTNR	frv2_127847	frv2_127847	yes	yes	0.018852	74.165	568880	3394.3	0	0	0	0	0	0	0	0	0	0	0	0	0	0	5812.1	0	0	0	0	0	0	0	0	0	0	0	22429	0	21269	12819	0	0	35100	0	0	0	11545	0	0	0	0
IVQVAQLTSNALALINNLATSHA	frv2_127847	frv2_127847	yes	yes	2.443e-88	181.61	20665000	22959	62253	68000	503810	1028600	34529	0	0	13258	0	36926	10886	81569	114970	113490	376890	3733	116960	0	0	269010	0	0	0	119060	0	0	0	0	164600	280130	0	0	601880	338840	88069	0	186160	168480	197120	0	18681
FIKDEFGVTPR	frv2_127896	frv2_127896	yes	yes	0.00032662	119.27	932780	0	0	0	0	0	0	0	0	0	0	0	0	0	15677	6804.5	5442.7	0	0	0	0	0	0	0	0	0	0	0	0	0	0	0	39499	0	52165	0	0	0	0	0	0	27159	0
SLEVVWQGSK	frv2_127896	frv2_127896	yes	yes	0.01194	76.927	829340	0	0	0	0	0	9581.3	0	0	0	0	0	0	11818	0	0	0	0	0	0	0	0	35869	0	0	20829	0	0	0	0	0	0	0	0	0	0	0	0	0	0	0	0	0
SVEMHHEQLAEAIPGDNVGFNVK	frv2_128083	frv2_128083	yes	yes	4.1891e-08	98.804	12192000	0	0	0	0	0	0	0	0	0	0	0	31310	0	0	0	68417	0	190990	0	286460	376370	0	0	0	0	270610	649150	0	0	0	448490	0	0	0	0	191390	0	136870	0	0	0	402500
[truncated: 2,798 more rows]
[truncated: 48 more columns]
