# Supplementary material for: Subcellular Phenotyping: Using Proteomics to Quantitatively Link Subcellular Leaf Protein and Organelle Distribution Analyses of Pisum sativum Cultivars
Source: Front Plant Sci. 2019 May 17;10:638. doi: 10.3389/fpls.2019.00638 (PMC6534152; doi:10.3389/fpls.2019.00638)
Supplement: Table S4 — List of 138 proteotypic target peptides (proteins) with subcellular localization analysis. [file Table_4.xlsx]

## Sheet: Tab S4
Table S4. List of 138 proteotypic target peptides (proteins) with subcellular localization analysis.
Accession	Description	Localizationa	Sequence	NAF Chloroplastb
frv2_112163	Prolyl-tRNA synthetase family protein	chloroplast	DLPLLINQWANVTR
295137014	ATP synthase subunit alpha	chloroplast	EGTVGIALNLESK
3893097	Ribulose-1,5-bisphosphate carboxylase/oxygenase large subunit	chloroplast	EIKFEFPAMDTL
frv2_82899	Sedoheptulose-1,7-bisphosphatase	chloroplast	EQVAAAMGVLGPR
295137004	Cytochrome b-559 alpha subunit	chloroplast	FDSLEQLDEFSR
753534344	Photosystem I P700 apoprotein A2	chloroplast	FSQGLAQDPTTR
frv2_119784	Mog1/PsbP/DUF1795-like photosystem II reaction center PsbP family protein	chloroplast	FYGDGFAIR
frv2_82899	Sedoheptulose-1,7-bisphosphatase	chloroplast	GIFTNVTSPTAK
frv2_88785	Ferredoxin-dependent glutamate synthase	chloroplast	GRENEIRPFGNPK
461501	FruCtose-bisphosphate aldolase 2	chloroplast	GSYADELVK
frv2_111576	Peptidyl-prolyl cis-trans isomerase	chloroplast	HVVFGHVIEGLDIVK
frv2_111059	Weak movement under blue light-like protein	chloroplast	IASDDEAFSGLAFK
frv2_114287	Oxygen-dependent coproporphyrinogen-III oxidase	chloroplast	IESILVSLPLTSR
frv2_47306	NAD(P)-binding Rossmann-fold superfamily protein	chloroplast	IFVAGATGSTGK
frv2_80315	Stem-loop-binding protein of 41 kDa protein A	chloroplast	ILEALKVPVSV
frv2_80307	50S ribosomal protein L19-2	chloroplast	LGDVMGILHK
295137043	30S ribosomal protein S19	chloroplast	LGEFSPTLNFGGFAK
3913218	Magnesium-chelatase subunit (CHLD)	chloroplast	LIGSVDVEESVK
frv2_83471	Pisum_sativum_v2_Contig5709_5 hypothetical protein	chloroplast	LIVTVHPSFGER
295136999	30S ribosomal protein S15	chloroplast	LLSYLSK
frv2_122262	Beta-fructofuranosidase	chloroplast	LMQWPIEEVENLR
frv2_110900	Adenylosuccinate synthetase isoenzyme 2	chloroplast	LSDLTHADFYEVK
295136999	30S ribosomal protein S15	chloroplast	LTSHFELHPK
frv2_72274	Ribulose bisphosphate carboxylase small chain 3A	chloroplast	PMFGTTDASQVLK
295137004	Cytochrome b-559 alpha subunit	chloroplast	QGIPLITGR
295137004	Cytochrome b559 subunit alpha	chloroplast	SFADIITSIR
frv2_86230	Endonuclease	chloroplast	SFFLGEVGDGAK
frv2_51174	Thioredoxin reductase	chloroplast	SHTVIFATGATAK
frv2_107818	Uncharacterized protein	chloroplast	SLMQALQK
frv2_49159	Glutamate-1-semialdehyde 2,1-aminomutase	chloroplast	SVGGQPIIIDSVK
frv2_120827	Plastid lipid-associated protein	chloroplast	SVTNYQAINADTLR
frv2_108091	2-cys peroxiredoxin-like protein	chloroplast	SYGVLIPDQGIALR
frv2_13952	Putative glutamyl endopeptidase	chloroplast	TENTQYYFVSWPDAK
295137014	ATP synthase subunit alpha	chloroplast	TFTGEAEAILK
295137015	ATP synthase subunit b	chloroplast	TIGATIGMFGSMK
frv2_99775	Glutamine synthetase leaf isozyme	chloroplast	TISKPVSHPSELPK
frv2_82899	Sedoheptulose-1,7-bisphosphatase	chloroplast	TTYVLALK
295137005	Cytochrome b559 subunit beta	chloroplast	TYPIFTVR
295136980	ATP synthase epsilon chain	chloroplast	VEAIVETIK
295136980	ATP synthase epsilon chain	chloroplast	VEAIVETIKR
frv2_121612	Pyruvate orthophosphate dikinase 1	chloroplast	VFSEMGSSVSYK
frv2_80414	Elongation factor P	chloroplast	VIDVDLPTTVK
295137014	ATP synthase subunit alpha, chloroplastic	chloroplast	VVNALAKPIDGR
frv2_60154	50S ribosomal protein L27	chloroplast	VYGDQVAKPGSIIVR
295136986	Photosystem I iron-sulfur center	chloroplast	VYLWHETTR
frv2_119752	ACT domain-containing protein ACR11	chloroplast	YFLTRPSTEESSF
frv2_52065	ATP-dependent Clp protease	chloroplast	YFSPTEAVEYGIIDK
543866	ATP synthase subunit alpha	mitochondrium	AAELTTLLESR
543866	ATP synthase subunit alpha	mitochondrium	AVDSLVPIGR
frv2_54270	Succinate dehydrogenase [ubiquinone] flavoprotein subunit 2	mitochondrium	AVIELENYGLPFSR
frv2_48605	Cytochrome P450 family protein	mitochondrium	EVGVPNLSDFFPMLK
frv2_83368	Mitochondrial phosphate carrier protein 3	mitochondrium	FASFETIVEQIYK
frv2_53446	NADH-ubiquinone oxidoreductase	mitochondrium	FVYLMGADDTNIDK
frv2_88811	NADH dehydrogenase	mitochondrium	HLFYDDAANLR
frv2_85635	Isoflavone-7-O-methyltransferase	mitochondrium	ISPLTGFLSLIEIYP
543866	ATP synthase subunit alpha	mitochondrium	ITNFYTNFQVDEIGR
frv2_80227	NAD-dependent malic enzyme 59 kDa isoform	mitochondrium	IVVVGAGSAGLGVLK
frv2_117139	E1 subunit-like 2-oxoglutarate dehydrogenase	mitochondrium	LNVLGNVVR	X
frv2_112323	Pyruvate dehydrogenase E1 component subunit alpha	mitochondrium	LVLAHDISTEK
543866	ATP synthase alpha subunit	mitochondrium	RTGSIVDVPAGK
frv2_49658	Subtilisin protease-like dd21.5 protein (Fragment)	mitochondrium	SALMTTAYTAYK
frv2_49658	Subtilisin protease-like dd21.5 protein (Fragment)	mitochondrium	SALMTTAYTAYKDGK
frv2_114489	Iron-sulfur cluster scaffold protein	mitochondrium	SLFAIDGITR
737595	Glycine cleavage system H protein	mitochondrium	SNVLDGLK
543866	ATP synthase subunit alpha	mitochondrium	TAIAIDTILNQK
frv2_78954	Acetylornithine aminotransferase	mitochondrium	TMGAVALTSK	X
543866	ATP synthase alpha subunit	mitochondrium	VVDALGVPIDGR
frv2_83471	Bifunctional L-3-cyanoalanine synthase	mitochondrium	YLSSVLYQDLR
frv2_115573	Pyridoxal kinase	cytosol	AAELAVSSLQALLQR
662225959	5-methyltetrahydropteroyltriglutamate-homocysteine methyltransferase	cytosol	ASHIVGYPR
frv2_113168	Endo-beta-mannosidase-like mannosylglycoprotein	cytosol	ATMPSEGWQIPVFK
282925	Legumin K (Fragment)	cytosol	ATPAEVLANAFGLR
frv2_49395	Nascent polypeptide-associated complex subunit alpha-like protein	cytosol	DIELVVTQAGVPR
frv2_131292	Phosphoenolpyruvate carboxylase 4	cytosol	EITSIWQTDEL
frv2_60999	Alcohol dehydrogenase 1	cytosol	FITHTIPFSEINK
frv2_46469	Elongation factor	cytosol	GGGQVIPTAR
frv2_51115	Delta-1-pyrroline-5-carboxylate synthetase	cytosol	GPVGVDGLLTTR
frv2_83696	L-idonate 5-dehydrogenase	cytosol	IIVVDVDDHR
frv2_82229	UDP-glucose 6-dehydrogenase 1	cytosol	ILTTNLWSAELSK
frv2_85494	Phenylcoumaran benzylic ether reductase-like protein	cytosol	ILVLGGTGYLGK
frv2_111385	Coatomer subunit alpha	cytosol	IVLGDLQTPFIK
frv2_68928	T-complex protein 1 subunit beta	cytosol	LAIGDLATQYFADR
frv2_78865	Fructose-bisphosphate aldolase	cytosol	LASINVENVESNR
frv2_49395	Nascent polypeptide-associated complex subunit alpha-like protein 2	cytosol	LGMKPVTGVSR
frv2_112029	UTP-glucose-1-phosphate uridylyltransferase	cytosol	LIADDFLPLPSK
frv2_80944	Vesicle-fusing ATPase	cytosol	LQILQIHTNK
frv2_27909	Lysine-tRNA ligase	cytosol	LVFYDLHGGGFK
frv2_84968	UMP-CMP kinase family protein	cytosol	NPTVVFVLGGPGSGK
frv2_62122	Aconitate hydratase	cytosol	SDETVAMIEAYLR
frv2_80789	Aconitate hydratase	cytosol	SDETVSMIESYLR
frv2_85077	Fructose-1,6-bisphosphatase	cytosol	SPIFLGSYDDIEEIK
frv2_48008	Limonoid UDP-glucosyltransferase	cytosol	TLLFGEK
frv2_76411	ATP-citrate synthase beta chain protein	cytosol	TTQALFYNYK
frv2_83143	26S protease regulatory subunit	cytosol	TYGLGPYSTSIK
frv2_95545	Peptidyl-prolyl cis-trans isomerase	cytosol	VFFDMTVGGQPAGR
frv2_75710	60S ribosomal protein L26-2	cytosol	VLMSAPLSADLR
frv2_47222	60S ribosomal protein L15-1	cytosol	VLNSYWVNEDSTFK
frv2_49134	Cytosol aminopeptidase family protein	cytosol	YAEDVSSGIIFGR
296511935	Monodehydroascorbate reductase I	cytosol	YILIGGGVSAGYAAR
frv2_80818	Seryl-tRNA synthetase/serine-tRNA ligase	cytosol	YVHLLNSTLTATER
frv2_98354	V-type proton ATPase subunit a	vacuole	AGDFFHSAQSR
frv2_113168	Mannosylglycoprotein endo-beta-mannosidase	vacuole	AQLVNYIQYR
frv2_110547	peroxidase	vacuole	DAVFLSGGPEYKVPLGR
frv2_110547	peroxidase	vacuole	DIGQAAGLLR
frv2_109379	V-type proton ATPase subunit E	vacuole	DLIIQSLLR
frv2_113075	V-type proton ATPase subunit C	vacuole	FVWDDAKYPTMSPLK
frv2_40409	Purple acid phosphatase	vacuole	GDVEAQLNPILQNIDHR
frv2_24850	Peroxidase	vacuole	GFLNSDQTLFTFTQTR
frv2_102814	At5g19740	vacuole	HLIYGPSK
frv2_113075	V-type proton ATPase subunit C	vacuole	HSFDTPLYR
frv2_110547	peroxidase	vacuole	IFDKDIGQAAGLLR
frv2_80154	V-type proton ATPase subunit G1	vacuole	ISEDVVAMLLK
frv2_82038	Aspartyl aminopeptidase-like protein	vacuole	ITYSFSPNSK
frv2_113075	V-ATPase subunit C	vacuole	LFSESILR
frv2_82227	Vacuolar H+-ATPase subunit H	vacuole	LISGTSLQLLR
frv2_82038	Aspartyl aminopeptidase-like protein	vacuole	NHSTIVAFAVGK
frv2_86963	SOUL heme-binding family protein	vacuole	SSFVVSFYVPKK
frv2_24850	Peroxidase	vacuole	TGNLDATPVIFDNQYFK
frv2_82038	Probable aspartyl aminopeptidase	vacuole	TVDVGAPQLSMHSIR
frv2_111135	V-type proton ATPase catalytic subunit A	vacuole	VGHDNLIGEIIR
frv2_113075	V-type proton ATPase subunit C	vacuole	VGTLDSLLSLSDDLNK
frv2_82227	Vacuolar H+-ATPase subunit H	vacuole	VLLTILDSSNDPR
frv2_24576	Aspartyl aminopeptidase	vacuole	YATNAVTSFIFR
frv2_82038	Protein disulfide-isomerase like	vacuole	YGVSGYPTIQWFPK
frv2_87505	Acid phosphatase	plasma membrane	FAGEANNLSPWK
frv2_53794	Phototropin	plasma membrane	FLQGPETDQATVSR
frv2_15438	Gamma-glutamyltranspeptidase	plasma membrane	INIMSDPGLR
frv2_114460	L-type lectin-domain receptor kinase IV.2-like protein	plasma membrane	KIDVTLAPIDVVKPK
frv2_55115	Transmembrane protein	plasma membrane	LLGVSEGASFDDILR	X
frv2_83260	Lecithine cholesterol acyltransferase-like protein	plasma membrane	SSESNLWLLPNPK
frv2_47402	Hypersensitive-induced response protein	plasma membrane	SSSVFIPHGPGAVK
frv2_15438	Gamma-glutamyltranspeptidase	plasma membrane	TLFQPAIELAK
frv2_5803	Patellin	plasma membrane	VVLTIDNQTSKK
frv2_5803	Patellin	plasma membrane	YIAPEQVPVQYGGLSR
frv2_76113	Glutamate-glyoxylate aminotransferase	peroxisome	AVMQILNTIIR
frv2_81144	Poly(A)-binding protein	peroxisome	GYGFVQFDSEEAAQK
frv2_81083	Peroxisomal (S)-2-hydroxy-acid oxidase/Peroxisomal glycolate oxidase	peroxisome	ISMPIMIAPTAMQK
frv2_47654	Glyoxylate aminotransferase	peroxisome	LAVEAWGLK
aSubcellular annotation according toTargetP (Emanuelsson et al., 2000) and WoLF PSORT protein localization predictor (Horton et al., 2007). b Three peptides were reannotated according to the NAF (Figure 3)
